# Supplementary material
Source: PubMed Central journal article supplement (PMC6714980)
Supplement: NIHMS1041080-supplement-Table.pdf [file NIHMS1041080-supplement-Table.pdf]

Supplementary Table 1: Summary of TMA Results and Clinical Information

| P.I. | Count | Renamed | Age | Sex | Date of Bx | Date last Seen | Dead(1) or Alive(0) | OS   | OS (Months) | LN Met | Clinical Stage | Pathologic Stage | Final PML | Total Grade | PTEN |
|------|-------|---------|-----|-----|------------|----------------|---------------------|------|-------------|--------|----------------|------------------|-----------|-------------|------|
| 1    | PR1   | 59      | M   | M   | 1/2/2004   | 0              | 0                   | 1495 | 50          |        | T1c            | T2a              | 1         | 7           | 2    |
| 2    | PR2   | 63      | M   | M   | 1/5/2007   | 9/15/2009      | 0                   | 884  | 33          |        | T2             | T3a              | 2         | 6           | 2    |
| 3    | PR3   | 73      | M   | M   | 1/5/2004   | 2/9/2011       | 0                   | 2562 | 86          |        | NA             | T2a              | 1         | 6           | 2    |
| 4    | PR4   | 65      | M   | M   | 1/5/2004   | 6/15/2010      | 0                   | 2392 | 78          |        | T1c            | T3a              | 2         | 6           | 2    |
| 5    | PR5   | 75      | M   | M   | 1/5/2004   | 8/15/2009      | 0                   | 2048 | 68          |        | T1c            | T3a              | 1         | 9           | 2    |
| 6    | PR6   | 67      | M   | M   | 1/8/2004   | 10/31/2004     | 0                   | 297  | 10          |        | T1c            | T2a              | 1         | 7           | 0    |
| 7    | PR7   | 68      | M   | M   | 1/8/2004   | 1/29/2010      | 0                   | 2213 | 74          |        | T2b            | T2c              | 1         | 7           | 0    |
| 8    | PR8   | 63      | M   | M   | 1/8/2004   | 9/15/2010      | 0                   | 2230 | 74          |        | T2c            | T2c              | 2         | 6           | 1    |
| 9    | PR9   | 57      | M   | M   | 1/9/2004   | 1/15/2013      | 0                   | 3294 | 110         |        | T1c            | T3a              | 2         | 6           | 0    |
| 10   | PR10  | 58      | M   | M   | 1/9/2004   | 12/2/2013      | 0                   | 3615 | 121         |        | T3a            | T3a              | 1         | 7           | 0    |
| 11   | PR11  | 81      | M   | M   | 1/12/2004  | 7/18/2008      | 0                   | 1835 | 55          |        | T2b            | T2b              | 2         | 7           | 0    |
| 12   | PR12  | 58      | M   | M   | 1/13/2004  | 3/21/2008      | 0                   | 788  | 27          |        | T1c            | T2c              | 1         | 8           | 0    |
| 13   | PR13  | 60      | M   | M   | 1/13/2004  | 3/27/2006      | 1                   | 804  | 27          |        | T1c            | T3a N1           | 2         | 7           | 0    |
| 14   | PR14  | 67      | M   | M   | 1/14/2004  | 1/14/2013      | 0                   | 3552 | 119         |        | NA             | T2b              | 2         | 7           | 1    |
| 15   | PR15  | 69      | M   | M   | 1/15/2004  | 12/1/2004      | 0                   | 6    | 0           |        | T2b            | T4               | 2         | 6           | 2    |
| 16   | PR16  | 74      | M   | M   | 1/15/2004  | 10/23/2013     | 0                   | 3569 | 119         |        | T1c            | T2c              | 1         | 6           | 0    |
| 17   | PR17  | 63      | M   | M   | 1/15/2004  | 1/9/2008       | 0                   | 1727 | 58          |        | T1c            | T2b              | 1         | 7           | 2    |
| 18   | PR18  | 65      | M   | M   | 1/15/2004  | 1/15/2010      | 0                   | 2188 | 73          |        | T2b            | T2b              | 1         | 8           | 1    |
| 19   | PR19  | 62      | M   | M   | 1/15/2004  | 8/11/2008      | 0                   | 1556 | 56          |        | T1c            | T2c              | 1         | 6           | 2    |
| 20   | PR20  | 64      | M   | M   | 1/16/2004  | 9/18/2013      | 0                   | 3530 | 118         |        | T1c            | T2c              | 2         | 7           | 2    |
| 21   | PR21  | 63      | M   | M   | 1/22/2004  | 11/25/2009     | 0                   | 2134 | 71          |        | T1c            | T2c N1           | 2         | 6           | 0    |
| 22   | PR22  | 51      | M   | M   | 1/22/2004  | 1/3/2014       | 0                   | 3634 | 121         |        | T2c            | T2b N1           | 2         | 7           | 0    |
| 23   | PR23  | 62      | M   | M   | 1/22/2004  | 1/12/2010      | 0                   | 2182 | 73          |        | T2a            | T2a              | 1         | 6           | 0    |
| 24   | PR24  | 62      | M   | M   | 1/26/2004  | 2/7/2009       | 0                   | 1839 | 61          |        | T2b            | T2b              | 2         | 7           | 1    |
| 25   | PR25  | 56      | M   | M   | 1/29/2004  | 1/22/2010      | 1                   | 2185 | 73          |        | T2             | T4               | 1         | 7           | 0    |
| 26   | PR26  | 65      | M   | M   | 1/29/2004  | 1/15/2009      | 0                   | 2117 | 71          |        | T2b            | T2b              | 2         | 7           | 0    |
| 27   | PR27  | 62      | M   | M   | 2/2/2004   | 5/30/2007      | 0                   | 1213 | 40          |        | T1c            | T3a              | 1         | 6           | 2    |
| 28   | PR28  | 56      | M   | M   | 2/3/2004   | 1/14/2014      | 0                   | 3633 | 121         |        | T1c            | T2b              | 2         | 6           | 2    |
| 29   | PR29  | 53      | M   | M   | 2/5/2004   | 7/21/2008      | 0                   | 1628 | 54          |        | T1c            | T2b              | 2         | 6           | 0    |
| 30   | PR30  | 56      | M   | M   | 2/5/2004   | 2/2/2010       | 0                   | 2189 | 73          |        | T1c            | T2c              | 2         | 6           | 1    |
| 31   | PR31  | 61      | M   | M   | 2/16/2004  | 6/3/2008       | 0                   | 473  | 16          |        | NA             | T2b              | 0         | 6           | 2    |
| 32   | PR32  | 49      | M   | M   | 2/17/2004  | 2/27/2008      | 0                   | 1476 | 49          |        | T1c            | T2b              | 1         | 6           | 2    |
| 33   | PR33  | 69      | M   | M   | 2/12/2004  | 3/15/2010      | 0                   | 2223 | 74          |        | T1c            | T2c              | 1         | 6           | 2    |
| 34   | PR34  | 60      | M   | M   | 2/16/2004  | 6/23/2008      | 0                   | 1589 | 53          |        | T1c            | T2b              | 2         | 6           | 2    |
| 35   | PR35  | 61      | M   | M   | 2/16/2004  | 5/18/2006      | 0                   | 1036 | 35          |        | T1c            | T2               | 1         | 6           | 2    |
| 36   | PR36  | 50      | M   | M   | 2/24/2004  | 6/26/2009      | 1                   | 1949 | 65          |        | T2c            | T2b              | 2         | 7           | 0    |
| 37   | PR37  | 58      | M   | M   | 2/24/2004  | 3/9/2010       | 0                   | 2199 | 73          |        | T2c            | T2c              | 2         | 7           | 2    |
| 38   | PR38  | 67      | M   | M   | 1/16/2004  | 1/16/2010      | 0                   | 2146 | 72          |        | T1c            | T2a              | 1         | 7           | 2    |
| 39   | PR39  | 64      | M   | M   | 3/2/2004   | 4/15/2010      | 0                   | 2235 | 75          |        | T1c            | T2b              | 2         | 7           | 1    |
| 40   | PR40  | 60      | M   | M   | 3/4/2004   | 6/8/2006       | 0                   | 826  | 28          |        | T2a            | T2a              | 1         | 6           | 2    |
| 41   | PR41  | 68      | M   | M   | 3/4/2004   | 6/15/2010      | 0                   | 2294 | 76          |        | T1c            | T2b              | 2         | 6           | 2    |
| 42   | PR42  | 65      | M   | M   | 3/8/2004   | 11/17/2008     | 0                   | 2085 | 69          |        | T1c            | T2               | 2         | 7           | 1    |
| 43   | PR43  | 60      | M   | M   | 3/8/2004   | 1/9/2007       | 0                   | 1037 | 35          |        | NA             | T2c              | 1         | 6           | 2    |
| 44   | PR44  | 62      | M   | M   | 3/9/2004   | 3/15/2009      | 0                   | 1832 | 61          |        | T1c            | T2c              | 2         | 7           | 1    |
| 45   | PR45  | 59      | M   | M   | 3/11/2004  | 4/21/2007      | 0                   | 1136 | 38          |        | T2c            | T2c              | 1         | 6           | 2    |
| 46   | PR46  | 67      | M   | M   | 3/13/2004  | 10/15/2010     | 0                   | 2406 | 80          |        | T1c            | T2c              | 1         | 7           | 2    |
| 47   | PR47  | 62      | M   | M   | 3/15/2004  | 2/3/2010       | 0                   | 2151 | 72          |        | T1c            | T2b              | 1         | 6           | 0    |
| 48   | PR48  | 61      | M   | M   | 3/15/2004  | 12/13/2013     | 0                   | 3559 | 119         |        | T3a            | T3b              | 2         | 7           | 0    |
| 49   | PR49  | 59      | M   | M   | 3/16/2004  | 8/19/2007      | 0                   | 1282 | 43          |        | T1c            | T2a              | 1         | 7           | 0    |
| 50   | PR50  | 72      | M   | M   | 3/16/2004  | 10/15/2009     | 0                   | 2039 | 68          |        | T3a            | T2b              | 2         | 6           | 1    |
| 51   | PR51  | 54      | M   | M   | 3/18/2004  | 12/8/2008      | 0                   | 1726 | 58          |        | T2             | T2               | 0         | 7           | 1    |
| 52   | PR52  | 69      | M   | M   | 3/18/2004  | 5/15/2010      | 0                   | 2249 | 75          |        | T2c            | T2c              | 0         | 6           | 1    |
| 53   | PR53  | 66      | M   | M   | 3/22/2004  | 10/15/2009     | 0                   | 2032 | 68          |        | T1c            | T2b              | 1         | 6           | 2    |
| 54   | PR54  | 64      | M   | M   | 3/26/2004  | 6/16/2008      | 0                   | 1847 | 62          |        | T1c            | T2c              | 2         | 6           | 2    |
| 55   | PR55  | 64      | M   | M   | 3/29/2004  | 9/15/2009      | 0                   | 1996 | 67          |        | T2a            | T2a              | 2         | 7           | 1    |
| 56   | PR56  | 66      | M   | M   | 3/30/2004  | 12/8/2009      | 0                   | 2079 | 69          |        | NA             | T2c              | 1         | 7           | 2    |
| 57   | PR57  | 69      | M   | M   | 3/30/2004  | 1/14/2013      | 0                   | 3506 | 117         |        | T3a            | T2b              | 1         | 7           | 1    |
| 58   | PR58  | 72      | M   | M   | 4/1/2004   | 2/16/2010      | 0                   | 2146 | 72          |        | T2c            | T2c              | 2         | 7           | 1    |
| 59   | PR59  | 59      | M   | M   | 4/5/2004   | 5/3/2006       | 0                   | 758  | 25          |        | T2c            | T2b              | 2         | 7           | 2    |
| 60   | PR60  | 62      | M   | M   | 4/5/2004   | 10/7/2008      | 0                   | 1646 | 55          |        | T1c            | T3a              | 2         | 7           | 1    |
| 61   | PR61  | 68      | M   | M   | 4/6/2004   | 10/13/2013     | 0                   | 3474 | 116         |        | T1c            | T2               | 2         | 7           | 2    |
| 62   | PR62  | 61      | M   | M   | 4/6/2004   | 5/31/2008      | 0                   | 1881 | 63          |        | T2c            | T2c              | 1         | 6           | 2    |
| 63   | PR63  | 64      | M   | M   | 4/6/2004   | 6/30/2010      | 0                   | 2276 | 76          |        | T1c            | T2c              | 0         | 7           | 2    |
| 64   | PR64  | 57      | M   | M   | 4/6/2004   | 1/16/2007      | 0                   | 1307 | 44          |        | T1c            | T2b              | 1         | 7           | 0    |
| 65   | PR65  | 64      | M   | M   | 4/9/2004   | 5/15/2010      | 0                   | 2228 | 74          |        | T2c            | T3a              | 1         | 6           | 1    |
| 66   | PR66  | 70      | M   | M   | 4/13/2004  | 4/15/2010      | 0                   | 2193 | 73          |        | T2c            | T2c              | 1         | 6           | 0    |
| 67   | PR67  | 58      | M   | M   | 4/15/2004  | 12/22/2008     | 0                   | 1712 | 57          |        | T2b            | T2b              | 1         | 7           | 1    |
| 68   | PR68  | 60      | M   | M   | 4/18/2004  | 11/12/2004     | 0                   | 207  | 7           |        | T1c            | T2b              | 1         | 6           | 1    |
| 69   | PR69  | 68      | M   | M   | 4/22/2004  | 3/12/2013      | 0                   | 3248 | 108         |        | T1c            | T2c              | 1         | 6           | 1    |
| 70   | PR70  | 66      | M   | M   | 4/22/2004  | 4/15/2010      | 0                   | 2184 | 73          |        | T1c            | T3a              | 1         | 6           | 1    |
| 71   | PR71  | 65      | M   | M   | 4/26/2004  | 1/15/2010      | 0                   | 2090 | 70          |        | T3a            | T3a              | 2         | 7           | 1    |
| 72   | PR72  | 56      | M   | M   | 4/27/2004  | 1/18/2013      | 0                   | 3482 | 116         |        | T2c            | T4               | 1         | 7           | 2    |
| 73   | PR73  | 66      | M   | M   | 4/27/2004  | 4/15/2010      | 0                   | 2179 | 73          |        | T1c            | T2b              | 1         | 6           | 2    |
| 74   | PR74  | 67      | M   | M   | 4/27/2004  | 12/13/2013     | 0                   | 3517 | 117         |        | T2b            | T2c              | 1         | 7           | 2    |
| 75   | PR75  | 58      | M   | M   | 4/28/2004  | 1/13/2008      | 0                   | 1650 | 55          |        | T1c            | T2c              | 1         | 8           | 1    |
| 76   | PR76  | 70      | M   | M   | 4/29/2004  | 8/15/2009      | 0                   | 1934 | 64          |        | T1c            | T2b              | 0         | 6           | 1    |
| 77   | PR77  | 60      | M   | M   | 4/30/2004  | 12/1/2011      | 0                   | 2771 | 92          |        | T2c            | T2c              | 2         | 7           | 1    |
| 78   | PR78  | 55      | M   | M   | 4/30/2004  | 1/11/2007      | 0                   | 886  | 33          |        | T2b            | T3a              | 1         | 7           | 1    |
| 79   | PR79  | 58      | M   | M   | 5/4/2004   | 9/22/2010      | 0                   | 2332 | 78          |        | T2c            | T2c              | 2         | 7           | 2    |
| 80   | PR80  | 64      | M   | M   | 5/4/2004   | 3/6/2011       | 0                   | 2497 | 83          |        | T1c            | T2c              | 2         | 7           | 1    |
| 81   | PR81  | 61      | M   | M   | 5/6/2004   | 9/17/2004      | 0                   | 13   | 0           |        | T1c            | T2c              | 2         | 7           | 1    |
| 82   | PR82  | 49      | M   | M   | 5/6/2004   | 8/13/2013      | 0                   | 3387 | 113         |        | T1c            | T2b              | 2         | 7           | 1    |
| 83   | PR83  | 80      | M   | M   | 5/6/2004   | 3/22/2013      | 0                   | 3242 | 108         |        | T2a            | T2c              | 2         | 7           | 2    |
| 84   | PR84  | 56      | M   | M   | 5/6/2004   | 9/28/2008      | 0                   | 1516 | 53          |        | T2c            | T2c              | 1         | 7           | 2    |
| 85   | PR85  | 49      | M   | M   | 5/6/2004   | 9/28/2008      | 0                   | 1848 | 62          |        | T2a            | T2c              | 1         | 6           | 2    |
| 86   | PR86  | 74      | M   | M   | 5/12/2004  | 9/27/2005      | 1                   | 380  | 13          |        | T1c            | T                | 1         | 6           | 1    |
| 87   | PR87  | 61      | M   | M   | 5/13/2004  | 6/9/2006       | 0                   | 757  | 25          |        | T1c            | T2c              | 1         | 7           | 2    |
| 88   | PR88  | 59      | M   | M   | 5/13/2004  | 2/13/2008      | 0                   | 1737 | 58          |        | T1c            | T2c              | 1         | 6           | 1    |
| 89   | PR89  | 62      | M   | M   | 5/13/2004  | 2/25/2011      | 0                   | 2479 | 83          |        | T1c            | T2c              | 1         | 6           | 1    |
| 90   | PR90  | 59      | M   | M   | 5/14/2004  | 7/29/2013      | 0                   | 3363 | 112         |        | T2c            | T2c              | 1         | 6           | 1    |
| 91   | PR91  | 55      | M   | M   | 5/17/2004  | 1/18/2005      | 0                   | 540  | 18          |        | T1c            | T2c              | 1         | 6           | 1    |
| 92   | PR92  | 55      | M   | M   | 5/17/2004  | 6/5/2008       | 0                   | 1476 | 49          |        | T1c            | T2b              | 1         | 7           | 1    |
| 93   | PR93  | 73      | M   | M   | 5/27/2004  | 3/13/2013      | 0                   | 3212 | 107         |        | T2b            | T2b              | 1         | 6           | 1    |
| 94   | PR94  | 52      | M   | M   | 5/27/2004  | 8/26/2010      | 0                   | 2282 | 76          |        | T1c            | T2b              | 1         | 7           | 2    |
| 95   | PR95  | 61      | M   | M   | 5/27/2004  | 7/24/2008      | 0                   | 1519 | 51          |        | T2c            | T2c              | 1         | 7           | 0    |
| 96   | PR96  | 68      | M   | M   | 5/27/2004  | 4/15/2010      | 0                   | 2149 | 72          |        | T1c            | T2c              | 1         | 7           | 2    |
| 97   | PR97  | 65      | M   | M   | 5/28/2004  | 1/11/2014      | 0                   | 3515 | 117         |        | T1c            | T2b              | 1         | 6           | 2    |
| 98   | PR98  | 54      | M   | M   | 6/3/2004   | 1/11/4/2008    | 0                   | 1625 | 54          |        | T2c            | T2c              | 1         | 7           | 1    |
| 99   | PR99  | 61      | M   | M   | 6/8/2004   | 8/31/2009      | 0                   | 1910 | 64          |        | T2c            | T2c              | 2         | 7           | 2    |
| 100  | PR100 | 61      | M   | M   | 6/10/2004  | 8/7/2004       | 0                   | 89   | 3           |        | T              |                  |           |             |      |

| Count | Age | Gender | Accession Date | Date Last Seen | Dead or Alive | OS   | OS (months) | LN Met | Clinical Stage | Pathologic Stage | PML | Total Grade | PTEN |
|-------|-----|--------|----------------|----------------|---------------|------|-------------|--------|----------------|------------------|-----|-------------|------|
| 1     | 68  | M      | 10/28/2002     | 2/13/2008      | 1             | 1934 | 64          | Y      | T2b N1         | T3b N1           | 0   | 8           | 0    |
| 2     | 73  | M      | 12/2/2002      | 8/6/2013       | 0             | 3600 | 130         | N      | T2a            | T3a              | 1   | 8           | 0    |
| 3     | 77  | M      | 12/5/2002      | 12/3/2013      | 0             | 4016 | 134         | N      | T2b            | T3a              | 1   | 9           | 0    |
| 4     | 76  | M      | 3/19/2003      | 9/20/2013      | 0             | 3839 | 128         |        | T3a            | T3b              | 1   | 9           | 0    |
| 5     | 70  | M      | 5/6/2003       | 9/15/2009      | 0             | 2324 | 77          | N      | T3a            | T2c              | 2   | 8           | 0    |
| 6     | 66  | M      | 5/8/2003       | 9/15/2009      | 0             | 2322 | 77          | N      | T1c            | T2b              | 2   | 9           | 0    |
| 7     | 64  | M      | 7/1/2003       | 10/11/2013     | 0             | 2756 | 125         | N      | T3a            | T3a              | 0   | 8           | 0    |
| 8     | 61  | M      | 7/19/2003      | 5/8/2009       | 1             | 2119 | 71          | N      | T3a            | T3a              | 1   | 9           | 0    |
| 9     | 65  | M      | 7/22/2003      | 11/15/2009     | 0             | 2308 | 77          | N      | T1c            | T2a              |     | 8           |      |
| 10    | 69  | M      | 8/19/2003      | 1/10/2014      | 0             | 2797 | 127         | N      | T3a            | T3a              | 0   | 9           | 0    |
| 11    | 60  | M      | 9/8/2003       | 9/24/2008      | 0             | 1843 | 61          |        | T2c            | T2c              | 1   | 8           | 1    |
| 12    | 54  | M      | 9/16/2003      | 1/30/2009      | 0             | 1963 | 65          | N      | T1c            | T3b              | 0   | 8           | 1    |
| 13    | 65  | M      | 9/18/2003      | 3/18/2008      | 0             | 1642 | 66          | N      | T2c            | T3a              | 2   | 8           | 0    |
| 14    | 68  | M      | 9/23/2003      | 12/29/2012     | 0             | 3382 | 113         | N      | T3             | T3a              |     | 8           | 0    |
| 15    | 64  | M      | 10/9/2003      | 12/13/2013     | 0             | 3718 | 124         | Y      | T3b            | T3b N1           | 0   | 9           | 0    |
| 16    | 63  | M      | 10/10/2003     | 1/15/2009      | 0             | 1924 | 64          | N      | T2b            | T3a              | 1   | 8           | 2    |
| 17    | 75  | M      | 10/14/2003     | 10/29/2013     | 0             | 3668 | 122         | N      | NA             | T3a N1           | 2   | 8           | 0    |
| 18    | 78  | M      | 10/16/2003     | 10/22/2013     | 0             | 3659 | 122         | N      | T3a            | T3a              | 1   | 9           | 0    |
| 19    | 70  | M      | 10/17/2003     | 3/11/2011      | 1             | 2658 | 90          | Y      | T3a N1         | T3a N1           | 0   | 8           | 0    |
| 20    | 69  | M      | 11/10/2003     | 6/15/2008      | 1             | 1679 | 66          | Y      | T2a            | T3b N1           | 1   | 8           | 0    |
| 21    | 70  | M      | 11/18/2003     | 8/6/2011       | 1             | 2818 | 94          | N      | NA             | T4               | 1   | 9           | 0    |
| 22    | 55  | M      | 12/2/2003      | 1/31/2005      | 0             | 426  | 14          | Y      | T1c            | T3a              | 1   | 9           | 1    |
| 23    | 69  | M      | 12/4/2003      | 6/20/2013      | 0             | 3455 | 115         | N      | T1c            | T3a              | 1   | 8           | 1    |
| 24    | 62  | M      | 2/2/2004       | 3/30/2007      | 0             | 1152 | 38          | Y      | T2c            | T3a N1           | 1   | 9           | 0    |
| 25    | 50  | M      | 3/2/2004       | 6/26/2009      | 1             | 1942 | 62          | Y      | T2c            | T3a N1           | 1   | 8           | 0    |
| 26    | 69  | M      | 3/30/2004      | 1/14/2013      | 0             | 3506 | 117         | N      | T3a            | T3b              | 1   | 8           | 0    |
| 27    | 56  | M      | 4/20/2004      | 1/18/2013      | 0             | 3482 | 116         | N      | T2c            | T4               | 1   | 9           | 2    |
| 28    | 55  | M      | 4/30/2004      | 1/11/2007      | 0             | 986  | 33          | N      | T2b            | T3a              | 0   | 8           | 1    |
| 29    | 68  | M      | 6/30/2004      | 6/13/2006      | 1             | 317  | 11          | Y      | T2c            | T3a N1           | 1   | 8           | 0    |
| 30    | 60  | M      | 8/2/2004       | 10/14/2013     | 0             | 3360 | 112         | N      | T2c            | T4               |     | 8           | 0    |
| 31    | 65  | M      | 8/2/2004       | 7/31/2010      | 1             | 2189 | 73          | Y      | T1c            | T3a N1           | 0   | 9           | 0    |
| 32    | 55  | M      | 8/9/2004       | 6/17/2008      | 0             | 1408 | 47          | N      | T1c            | T3a              | 1   | 8           | 0    |
| 33    | 71  | M      | 8/30/2004      | 5/6/2011       | 0             | 2440 | 81          | N      | T2b            | T3b              |     | 9           | 0    |
| 34    | 54  | M      | 10/1/2004      | 1/12/2009      | 0             | 1899 | 62          |        | T1c            | T3a              | 0   | 8           | 1    |
| 35    | 63  | M      | 10/3/2004      | 2/16/2011      | 0             | 2318 | 77          | N      | T1c            | T2c              | 1   | 8           | 0    |
| 36    | 66  | M      | 11/8/2004      | 10/15/2009     | 0             | 1802 | 60          | N      | T1c            | T2a              | 1   | 9           | 0    |
| 37    | 69  | M      | 12/16/2004     | 11/14/2006     | 0             | 698  | 23          | Y      | NA             | T3b              | 1   | 9           | 2    |
| 38    | 69  | M      | 12/19/2004     | 2/26/2010      | 0             | 1692 | 63          | N      | T2c            | T4               | 1   | 9           | 1    |
| 39    | 61  | M      | 1/19/2005      | 12/8/2013      | 0             | 3243 | 108         | N      | T1c            | T3a              | 0   | 9           | 1    |
| 40    | 69  | M      | 10/7/2005      | 11/13/2008     | 1             | 1864 | 62          | N      | T3a            | T2c              | 0   | 8           | 1    |











|           |            |             |             |          |          |            |          |            |         |              |           |          |          |          |          |          |          |          |          |
|-----------|------------|-------------|-------------|----------|----------|------------|----------|------------|---------|--------------|-----------|----------|----------|----------|----------|----------|----------|----------|----------|
| 17494394  | 2.910879   | 6.33035344  | 14.1322615  | 3.71E-07 | 5.57E-06 | 6.9922298  | Trim30a  | NM_009099  | RefSeq  | Mus musculus | 4.749755  | 4.010406 | 4.377337 | 7.55635  | 7.270005 | 7.04378  | 7.107629 | 7.340105 | 7.517814 |
| 17521541  | 1.55922133 | 8.66142556  | 14.1159073  | 3.74E-07 | 5.62E-06 | 6.98204674 | Uba7     | NM_023738  | RefSeq  | Mus musculus | 4.747955  | 7.49383  | 7.830735 | 9.15211  | 9.150246 | 9.157828 | 9.15759  | 9.174466 | 9.36207  |
| 17261107  | 2.548421   | 7.38166333  | 14.0887141  | 3.80E-07 | 5.69E-06 | 6.96508934 | Rel      | ENSMUST00T | ENSEMBL | cDNA-known   | 6.1199728 | 5.772248 | 5.365671 | 8.27816  | 8.269065 | 8.435685 | 8.04876  | 8.062047 | 8.003606 |
| 17408765  | 1.619437   | 7.96867422  | 14.058498   | 3.87E-07 | 5.76E-06 | 6.94620961 | Mov10    | NM_008619  | RefSeq  | Mus musculus | 7.025368  | 6.775207 | 6.893924 | 8.489696 | 8.656225 | 8.406689 | 8.338243 | 8.674399 | 8.674399 |
| 17244949  | 1.53227433 | 6.95438233  | 14.02480048 | 3.94E-07 | 5.83E-06 | 6.92736498 | Krr1     | NM_178610  | RefSeq  | Mus musculus | 5.381587  | 5.25065  | 5.461645 | 7.022488 | 6.931985 | 6.736232 | 6.714689 | 6.727517 | 6.963548 |
| 17497718  | 1.76566667 | 10.3990389  | 14.0040071  | 3.99E-07 | 5.91E-06 | 6.91206271 | Iftm3    | ENSMUST00T | ENSEMBL | cDNA-known   | 9.946789  | 6.304011 | 10.06613 | 11.67696 | 11.66906 | 11.5936  | 11.39623 | 11.36285 | 11.65003 |
| 17374121  | 2.23257933 | 6.62526     | 13.9965901  | 4.01E-07 | 5.93E-06 | 6.90740487 | Ccdc3a   | NM_026613  | RefSeq  | Mus musculus | 5.411726  | 5.260839 | 4.792282 | 7.416924 | 7.519531 | 7.22613  | 7.45103  | 7.303022 | 7.248586 |
| 17495414  | 1.55375067 | 9.41479511  | 13.9818036  | 4.04E-07 | 5.96E-06 | 6.89811189 | Pik3c2a  | NM_011083  | RefSeq  | Mus musculus | 8.280283  | 8.582841 | 8.290002 | 8.957399 | 10.01232 | 9.943169 | 10.05927 | 9.90559  | 9.792142 |
| 17492549  | 1.590641   | 8.5662822   | 13.9782715  | 4.05E-07 | 5.97E-06 | 6.8958097  | Man2a2   | NM_127903  | RefSeq  | Mus musculus | 7.554293  | 7.358978 | 7.636006 | 9.229141 | 9.019272 | 9.072787 | 9.180774 | 9.157701 | 8.887102 |
| 17249097  | 1.41311267 | 9.20453044  | 13.965971   | 4.08E-07 | 6.00E-06 | 6.88815095 | Rnf130   | NM_021540  | RefSeq  | Mus musculus | 8.406391  | 8.017287 | 8.781763 | 9.595621 | 9.56163  | 9.502634 | 9.742071 | 9.814634 | 9.863617 |
| 17220394  | 2.502146   | 7.375935    | 13.9537473  | 4.11E-07 | 6.03E-06 | 6.8804571  | Cpnr8    | NM_130080  | RefSeq  | Mus musculus | 5.655958  | 5.591144 | 6.032867 | 8.549055 | 8.167683 | 8.069033 | 8.095778 | 8.853369 | 7.866264 |
| 17262202  | 2.12306667 | 7.09180044  | 13.9480809  | 4.12E-07 | 6.04E-06 | 6.87682636 | Irgm1    | NM_008236  | RefSeq  | Mus musculus | 5.763858  | 5.434838 | 5.86091  | 7.893456 | 7.874609 | 7.660741 | 7.880488 | 7.50736  | 7.950664 |
| 17297059  | 1.398824   | 7.78476211  | 13.9473388  | 4.13E-07 | 6.04E-06 | 6.8764146  | Ahhb6    | NM_025341  | RefSeq  | Mus musculus | 6.845462  | 6.903288 | 6.73997  | 8.340329 | 8.074381 | 8.270482 | 8.17244  | 8.301754 | 8.414753 |
| 17520326  | 1.85052633 | 6.196758    | 13.946832   | 4.13E-07 | 6.04E-06 | 6.87609515 | Piscr2   | NM_001195  | RefSeq  | Mus musculus | 4.8971    | 5.213646 | 4.937619 | 6.59341  | 6.99194  | 7.014594 | 6.76413  | 6.684027 | 6.674356 |
| 17290921  | 1.10605767 | 7.98862456  | 13.9398284  | 4.14E-07 | 6.06E-06 | 6.87167955 | Zkscan3  | NM_001145  | RefSeq  | Mus musculus | 7.52005   | 4.244236 | 7.411363 | 8.56779  | 8.639938 | 8.484184 | 8.044207 | 7.886003 | 7.90176  |
| 17510120  | 1.751088   | 7.69274367  | 13.9156619  | 4.20E-07 | 6.13E-06 | 6.85642661 | Pgcp1    | NM_023217  | RefSeq  | Mus musculus | 6.800144  | 6.681218 | 6.39659  | 8.179575 | 8.242663 | 8.518878 | 8.047467 | 8.004293 | 8.137565 |
| 17498323  | 3.281051   | 6.52197033  | 13.9131945  | 4.21E-07 | 6.14E-06 | 6.85486784 | Tnfrsf23 | NM_024290  | RefSeq  | Mus musculus | 4.318902  | 6.379528 | 4.11272  | 6.968815 | 7.437569 | 7.739819 | 8.022542 | 8.080428 | 8.151132 |
| 17388803  | 1.42567737 | 10.19171276 | 13.8908436  | 4.26E-07 | 6.20E-06 | 6.84073561 | Cat      | ENSMUST00T | ENSEMBL | cDNA-known   | 9.370929  | 0.959002 | 9.193117 | 10.53924 | 10.67861 | 10.68223 | 10.62374 | 10.83407 | 10.79321 |
| 17241162  | 1.44335367 | 8.37112956  | 13.8887537  | 4.27E-07 | 6.21E-06 | 6.83941307 | Sgpl1    | NM_009163  | RefSeq  | Mus musculus | 7.241702  | 7.558515 | 7.271668 | 8.738099 | 8.919374 | 8.744473 | 8.881812 | 8.98513  | 8.995313 |
| 17456721  | 1.6894667  | 8.63003889  | 13.8711623  | 4.31E-07 | 6.25E-06 | 6.82827309 | Sm       | NM_176996  | RefSeq  | Mus musculus | 7.536395  | 7.402344 | 7.71074  | 9.438233 | 9.061175 | 9.219611 | 9.112497 | 9.19911  | 8.990245 |
| 17345038  | 1.159592   | 10.9140393  | 13.8684881  | 4.32E-07 | 6.25E-06 | 6.82657847 | Cd2ap    | NM_009847  | RefSeq  | Mus musculus | 10.16908  | 10.22726 | 9.989784 | 11.29625 | 11.22494 | 11.34371 | 11.36202 | 11.34245 | 11.27086 |
| 17290242  | 1.400514   | 9.60577411  | 13.8660717  | 4.33E-07 | 6.25E-06 | 6.8250469  | Net1     | NM_019671  | RefSeq  | Mus musculus | 8.817854  | 8.573247 | 8.703377 | 10.05138 | 10.10266 | 10.14198 | 10.04956 | 9.851699 | 10.16021 |
| 17404269  | 1.62527233 | 6.57552144  | 13.8612622  | 4.34E-07 | 6.26E-06 | 6.82197493 | Pde7a    | ENSMUST00T | ENSEMBL | cDNA-known   | 5.710333  | 5.222023 | 5.554418 | 7.139113 | 7.137386 | 7.086092 | 7.087283 | 7.104263 | 7.140562 |
| 17299329  | 2.838247   | 6.56913778  | 13.8546714  | 4.35E-07 | 6.28E-06 | 6.81781767 | Igals3   | NM_001145  | RefSeq  | Mus musculus | 4.895818  | 4.076562 | 4.831827 | 7.442859 | 7.409188 | 7.466901 | 7.49399  | 7.637167 | 7.86528  |
| 17298775  | 2.947863   | 5.869592    | 13.8529941  | 4.36E-07 | 6.28E-06 | 6.81675357 | Anxa8    | NM_013473  | RefSeq  | Mus musculus | 4.258664  | 3.820793 | 3.588459 | 6.702902 | 6.94646  | 6.862153 | 6.471712 | 7.181149 | 6.961286 |
| 17291195  | 1.71912933 | 9.161568    | 13.8551703  | 4.36E-07 | 6.28E-06 | 6.8159333  | Hiet1h   | NM_015787  | RefSeq  | Mus musculus | 5.655727  | 5.582628 | 5.460345 | 7.342546 | 7.08392  | 7.429686 | 7.314464 | 7.654081 | 7.383334 |
| 17504138  | 2.65386533 | 5.41306889  | 13.8479125  | 4.37E-07 | 6.28E-06 | 6.81352896 | Ct17     | NM_011332  | RefSeq  | Mus musculus | 4.216688  | 4.099991 | 4.031172 | 6.632301 | 6.632156 | 7.04499  | 4.947077 | 5.696357 | 5.41714  |
| 17289717  | 1.08911933 | 9.39859444  | 13.805174   | 4.48E-07 | 6.43E-06 | 6.78636336 | Elovl7   | NM_029001  | RefSeq  | Mus musculus | 8.717157  | 7.800439 | 8.49596  | 9.714805 | 9.718821 | 9.747288 | 9.860358 | 9.831144 | 9.801378 |
| 17228136  | 1.25153333 | 9.37968822  | 13.7970147  | 4.50E-07 | 6.45E-06 | 6.78116788 | Lamc2    | NM_008485  | RefSeq  | Mus musculus | 8.416923  | 8.602907 | 8.459798 | 9.673828 | 9.715732 | 9.846674 | 9.860727 | 9.918285 | 10.02305 |
| 17315743  | 2.568173   | 8.30687422  | 13.7970418  | 4.55E-07 | 6.51E-06 | 6.76971312 | Osmr     | NM_011019  | RefSeq  | Mus musculus | 6.801498  | 6.174356 | 6.867283 | 9.055007 | 9.29899  | 9.139369 | 9.912127 | 9.266539 | 9.811409 |
| 17409075  | 1.84333933 | 6.772224    | 13.7783098  | 4.55E-07 | 6.51E-06 | 6.76942627 | Csf1     | NM_007778  | RefSeq  | Mus musculus | 5.801921  | 5.383752 | 5.421348 | 7.441474 | 7.227754 | 7.467811 | 7.281245 | 7.371303 | 7.553408 |
| 17466025  | 1.99682567 | 6.416121    | 13.7680857  | 4.60E-07 | 6.56E-06 | 6.75812689 | Alk1     | NM_001103  | RefSeq  | Mus musculus | 4.887224  | 5.007723 | 5.238757 | 6.960698 | 7.164808 | 7.085765 | 7.147702 | 7.284266 | 7.455236 |
| 17524930  | 2.05880167 | 7.82112333  | 13.7680264  | 4.60E-07 | 6.56E-06 | 6.75808906 | Acp35    | NM_001102  | RefSeq  | Mus musculus | 5.07896   | 6.625516 | 6.089698 | 8.369467 | 8.410728 | 8.61932  | 8.436303 | 8.738266 | 8.605316 |
| 17423479  | 1.51756567 | 7.65457389  | 13.752093   | 4.62E-07 | 6.59E-06 | 6.75251065 | Osgin2   | NM_145950  | RefSeq  | Mus musculus | 5.973816  | 5.798433 | 5.64457  | 7.284208 | 7.210785 | 7.394412 | 7.249498 | 7.137244 | 7.17831  |
| 17216960  | 2.423492   | 11.3921193  | 13.7489551  | 4.63E-07 | 6.58E-06 | 6.75050549 | Pigr     | NM_011082  | RefSeq  | Mus musculus | 8.930654  | 9.32637  | 10.14224 | 12.21054 | 12.16811 | 12.19109 | 12.19316 | 12.28594 | 12.18097 |
| 17361008  | 1.587927   | 8.86771056  | 13.7450602  | 4.64E-07 | 6.59E-06 | 6.74836496 | Tcigr1   | NM_016921  | RefSeq  | Mus musculus | 9.956027  | 7.581546 | 7.946895 | 9.442473 | 9.523414 | 9.283262 | 9.340966 | 9.347903 | 9.387689 |
| 17390810  | 2.12849067 | 6.38262789  | 13.7310714  | 4.68E-07 | 6.64E-06 | 6.73906916 | Gatm     | NM_025961  | RefSeq  | Mus musculus | 5.251323  | 4.909414 | 4.583934 | 6.985242 | 7.094615 | 7.050286 | 7.055158 | 7.28563  | 7.228049 |
| 173998812 | 1.37092933 | 10.1046658  | 13.722977   | 4.70E-07 | 6.66E-06 | 6.73388814 | S100a6   | NM_011313  | RefSeq  | Mus musculus | 9.188139  | 9.1997   | 10.42568 | 10.57906 | 10.76783 | 10.44168 | 10.61013 | 10.45783 | 10.45783 |
| 17354804  | 1.31886433 | 8.18119444  | 13.7207645  | 4.71E-07 | 6.67E-06 | 6.73247153 | Grpel2   | NM_021296  | RefSeq  | Mus musculus | 7.374394  | 7.080793 | 7.364045 | 8.611164 | 8.469895 | 8.667766 | 8.687293 | 8.6764   | 8.672    |
| 17342676  | 1.444849   | 8.28432944  | 13.7078118  | 4.75E-07 | 6.70E-06 | 6.72417348 | Bak1     | ENSMUST00T | ENSEMBL | cDNA-known   | 7.308286  | 7.611006 | 7.502024 | 8.771601 | 8.656494 | 8.877318 | 8.687016 | 8.755609 | 8.839161 |
| 17445426  | 1.96061333 | 5.91690733  | 13.6818865  | 4.82E-07 | 6.79E-06 | 6.70754204 | Steap2   | NM_001103  | RefSeq  | Mus musculus | 4.458576  | 4.615763 | 4.409098 | 6.547928 | 6.395206 | 6.412397 | 6.468451 | 6.941324 | 7.017113 |
| 17396878  | 2.70490667 | 7.39594544  | 13.6808424  | 4.86E-07 | 6.79E-06 | 6.69864841 | Soc2     | NM_011443  | RefSeq  | Mus musculus | 4.555856  | 5.285172 | 5.858129 | 8.559496 | 8.350878 | 8.032233 | 8.098804 | 7.754467 | 7.856167 |
| 17253996  | 1.76822233 | 9.161568    | 13.6656132  | 4.87E-07 | 6.82E-06 | 6.69771143 | Tmrm9b   | ENSMUST00T | ENSEMBL | cDNA-known   | 8.295562  | 7.874565 | 7.781743 | 9.73193  | 9.798549 | 9.72605  | 9.741253 | 9.830557 | 9.673941 |
| 17573003  | 1.19343667 | 8.837356    | 13.6447169  | 4.93E-07 | 6.86E-06 | 6.6816751  | Upt1     | BC147845   | GenBank | Mus musculus | 7.073493  | 0.396255 | 6.434272 | 9.109705 | 9.08274  | 8.928274 | 9.081398 | 9.011844 | 9.011844 |
| 17519533  | 1.13717567 | 7.26014467  | 13.6181422  | 5.01E-07 | 6.98E-06 | 6.6651979  | Lysf2    | NM_027309  | RefSeq  | Mus musculus | 6.432665  | 6.483066 | 5.636918 | 7.49269  | 7.669874 | 7.701614 | 7.619694 | 7.761422 | 7.645787 |
| 17531351  | 1.623633   | 6.55457489  | 13.613177   | 5.01E-07 | 6.98E-06 | 6.6653429  | Zfp532   | NM_007255  | RefSeq  | Mus musculus | 5.392733  | 5.626269 | 5.689609 | 7.290689 | 7.287073 | 7.001748 | 6.905018 | 7.021054 | 7.66981  |
| 17554411  | 1.85740533 | 6.89416922  | 13.6034147  | 5.05E-07 | 6.93E-06 | 6.65701576 | Zfp608   | NM_175751  | RefSeq  | Mus musculus | 5.647234  | 5.738262 | 6.613908 | 7.673455 | 7.624346 | 7.273819 | 7.713425 | 7.301417 | 7.476195 |
| 17510099  | 1.347059   | 8.02253333  | 13.5850577  | 5.10E-07 | 7.10E-06 | 6.64515561 | Sabp4    | NM_133772  | RefSeq  | Mus musculus | 7.180683  | 7.158741 | 7.101783 | 8.569608 | 8.325758 | 8.587318 | 8.490781 | 8.507831 | 8.279997 |
| 17357389  | 1.15126667 | 9.87411556  | 13.5848389  | 5.11E-07 | 7.10E-06 | 6.64472001 | Ahnak    | NM_009643  | RefSeq  | Mus musculus | 9.106167  | 8.934286 |          |          |          |          |          |          |          |

|          |            |             |            |          |          |            |            |             |         |                 |           |          |          |          |          |          |          |          |          |
|----------|------------|-------------|------------|----------|----------|------------|------------|-------------|---------|-----------------|-----------|----------|----------|----------|----------|----------|----------|----------|----------|
| 17457892 | 1.35033133 | 7.78055478  | 12.9758439 | 7.38E-07 | 9.13E-06 | 6.24441759 | Casp2      | NM_007610   | RefSeq  | Mus musculus    | 6.959722  | 6.741473 | 6.905094 | 8.074449 | 8.206768 | 8.376066 | 8.166667 | 8.234467 | 8.360287 |
| 17282570 | 3.24093633 | 6.54982656  | 12.9596959 | 7.47E-07 | 9.21E-06 | 6.23168046 | Ltbp2      | NM_013589   | RefSeq  | Mus musculus    | 4.537268  | 4.553093 | 4.374453 | 8.221973 | 7.508098 | 7.457552 | 7.268099 | 7.911316 | 7.107877 |
| 17237028 | 1.44562233 | 6.46746344  | 12.9591203 | 7.47E-07 | 9.21E-06 | 6.23129122 | Rassf9     | NM_146240   | RefSeq  | Mus musculus    | 5.417671  | 5.648421 | 5.709702 | 7.01595  | 7.041675 | 7.055036 | 6.797816 | 6.936681 | 6.584219 |
| 17255963 | 1.10051867 | 8.255252    | 12.9580883 | 7.47E-07 | 9.21E-06 | 6.23059328 | Stard3     | NM_021547   | RefSeq  | Mus musculus    | 7.514901  | 7.441619 | 7.705017 | 6.654661 | 6.841864 | 6.666668 | 8.522901 | 8.630206 | 8.519531 |
| 17458962 | 2.662282   | 8.05687589  | 12.9540446 | 7.49E-07 | 9.22E-06 | 6.22785799 | Herc6      | NM_025992   | RefSeq  | Mus musculus    | 6.480563  | 6.148858 | 6.419569 | 8.924438 | 9.224109 | 8.889030 | 8.867502 | 8.359221 | 9.19872  |
| 17551165 | 1.89225033 | 6.38735778  | 12.952376  | 7.50E-07 | 9.22E-06 | 6.22672907 | ---        | ---         | ---     | ---             | 4.582175  | 4.723868 | 5.015747 | 6.457647 | 6.630498 | 6.910396 | 7.693157 | 7.837011 | 7.635271 |
| 17293238 | 3.63497533 | 10.2203238  | 12.9466531 | 7.53E-07 | 9.24E-06 | 6.22285609 | ---        | ---         | ---     | ---             | 7.0803    | 8.144135 | 8.225479 | 11.60219 | 11.40295 | 11.3497  | 11.32967 | 11.6809  | 11.27298 |
| 17329013 | 1.65571333 | 7.36895144  | 12.9319097 | 7.60E-07 | 9.31E-06 | 6.212871   | ---        | HQ724329    | GenBank | Mus musculus    | 4.020013  | 3.70256  | 3.811882 | 10.88171 | 9.385059 | 9.7644   | 8.683813 | 7.234925 | 8.836201 |
| 17266967 | 4.528082   | 7.22533744  | 12.9076859 | 7.71E-07 | 9.42E-06 | 6.19548111 | Cd3        | NM_011337   | RefSeq  | Mus musculus    | 4.642     | 4.677516 | 3.969965 | 8.144416 | 8.794522 | 9.364789 | 8.006676 | 7.788752 | 9.069401 |
| 17469385 | 1.03838333 | 7.24330722  | 12.8995274 | 7.75E-07 | 9.46E-06 | 6.19905911 | Tgfa       | NM_011199   | RefSeq  | Mus musculus    | 6.03297   | 6.482111 | 6.514705 | 7.525655 | 7.497764 | 7.657392 | 7.551439 | 7.712644 | 7.664778 |
| 17469801 | 1.08630333 | 7.79750722  | 12.8765283 | 7.86E-07 | 9.56E-06 | 6.17526697 | Nudt19     | ENSMUST00X  | ENSEMBL | cdna-known      | 7.167195  | 7.016973 | 7.040939 | 8.228252 | 8.058995 | 8.205507 | 8.232379 | 8.062091 | 8.159955 |
| 17388733 | 2.416653   | 9.37160011  | 12.8355099 | 8.02E-07 | 9.72E-06 | 6.15413846 | Cd44       | NM_009851   | RefSeq  | Mus musculus    | 8.187859  | 7.583703 | 7.336469 | 10.15523 | 10.10662 | 10.08704 | 10.22734 | 10.42429 | 10.24495 |
| 17481716 | 1.59236233 | 7.33802467  | 12.8345949 | 8.08E-07 | 9.76E-06 | 6.14625001 | Ampd3      | NM_009567   | RefSeq  | Mus musculus    | 6.484133  | 6.173378 | 6.093966 | 7.907249 | 7.754014 | 7.867301 | 7.95083  | 8.062988 | 7.748633 |
| 17249977 | 3.52160033 | 6.35513289  | 12.8298581 | 8.10E-07 | 9.77E-06 | 6.14345873 | Gm12250    | NM_001135   | RefSeq  | Mus musculus    | 8.552445  | 8.254273 | 4.373504 | 7.664943 | 8.016919 | 7.936169 | 7.062677 | 8.602331 | 7.805927 |
| 17441051 | 4.33599833 | 7.34552978  | 12.7991188 | 8.26E-07 | 9.94E-06 | 6.12244842 | Oasl1      | ENSMUST00X  | ENSEMBL | cdna-known      | 1.554466  | 1.401484 | 5.123684 | 8.725103 | 9.039575 | 9.361499 | 8.399852 | 8.06937  | 8.246523 |
| 17516707 | 1.616306   | 7.98414189  | 12.7926714 | 8.29E-07 | 9.97E-06 | 6.11803558 | Mpz3       | NM_010931   | RefSeq  | Mus musculus    | 7.013461  | 6.668344 | 7.060369 | 8.566468 | 8.364769 | 8.659855 | 8.396828 | 8.566331 | 8.560852 |
| 17454226 | 1.159591   | 6.73809622  | 12.7540353 | 8.49E-07 | 1.02E-05 | 6.09154746 | Mcm7       | ENSMUST00X  | ENSEMBL | cdna-known      | 1.964836  | 1.805229 | 6.767464 | 8.030014 | 7.89117  | 8.140118 | 7.965438 | 8.087771 | 8.045826 |
| 17281126 | 1.03140367 | 5.91596344  | 12.7537494 | 8.50E-07 | 1.02E-05 | 6.09116576 | Smx6       | ENSMUST00X  | ENSEMBL | cdna-known      | 1.8802386 | 1.839655 | 8.737954 | 9.888776 | 9.881955 | 9.800775 | 9.947433 | 9.882833 | 9.797652 |
| 17357222 | 0.91311667 | 9.32773778  | 12.7515799 | 8.51E-07 | 1.02E-05 | 6.08986151 | ---        | ---         | ---     | ---             | 8.772265  | 8.850388 | 6.693846 | 9.678698 | 9.696852 | 6.980749 | 9.534693 | 9.912447 | 9.509932 |
| 17336228 | 1.05180167 | 5.98877411  | 12.7313042 | 8.62E-07 | 1.03E-05 | 6.07592804 | Tapbp      | ENSMUST00X  | ENSEMBL | cdna-known      | 9.807847  | 8.777355 | 9.034235 | 9.963751 | 9.983769 | 9.927322 | 8.952431 | 8.984147 | 9.95811  |
| 17315993 | 1.40941    | 7.20551822  | 12.7154037 | 8.70E-07 | 1.04E-05 | 6.06498656 | Ral1a      | NM_030690   | RefSeq  | Mus musculus    | 6.505784  | 6.195886 | 6.129867 | 7.749141 | 7.704998 | 7.629448 | 7.627041 | 7.721072 | 7.570702 |
| 17509455 | 1.63724533 | 7.38006533  | 12.7122138 | 8.72E-07 | 1.04E-05 | 6.06278999 | Sap30      | NM_021788   | RefSeq  | Mus musculus    | 6.325553  | 5.962542 | 6.357351 | 7.666551 | 8.03287  | 7.887344 | 7.802181 | 7.837004 | 7.930775 |
| 17285742 | 2.33081633 | 6.61701867  | 12.6801907 | 8.90E-07 | 1.06E-05 | 6.04070978 | Hist1h2bk  | ENSMUST00X  | ENSEMBL | cdna-known      | 1.5709077 | 1.945611 | 6.948518 | 7.247983 | 7.269567 | 7.468105 | 7.087164 | 7.579328 | 7.907815 |
| 17319783 | 0.86154667 | 10.9598933  | 12.6700573 | 8.96E-07 | 1.06E-05 | 6.03371176 | Cyb5b3     | ENSMUST00X  | ENSEMBL | cdna-known      | 10.38496  | 10.43954 | 10.37406 | 11.31973 | 11.24202 | 11.22145 | 11.22346 | 11.26504 | 11.16878 |
| 17481305 | 3.482324   | 5.25916644  | 12.6647742 | 8.99E-07 | 1.06E-05 | 6.03061122 | Trim12c    | NM_001146   | RefSeq  | Re Mus musculus | 3.250114  | 4.088978 | 4.028704 | 9.688854 | 7.797812 | 7.048102 | 8.434965 | 4.534066 | 4.771903 |
| 17294421 | 0.58283367 | 9.811433767 | 12.6576018 | 9.03E-07 | 1.07E-05 | 6.02510289 | Cst        | NM_009817   | RefSeq  | Mus musculus    | 9.262001  | 9.141597 | 9.262001 | 9.153481 | 10.00901 | 10.07739 | 10.21556 | 10.19819 | 10.21573 |
| 17318089 | 3.62655267 | 6.0193078   | 12.6569673 | 9.03E-07 | 1.07E-05 | 6.02466413 | Ly6cl      | NM_02152745 | RefSeq  | Mus musculus    | 3.642405  | 3.414121 | 3.647005 | 6.715491 | 7.402844 | 7.374754 | 6.834331 | 7.149337 | 7.904147 |
| 17483615 | 2.23151333 | 5.49918122  | 12.647232  | 9.09E-07 | 1.07E-05 | 6.01792952 | Igkap      | NM_021334   | RefSeq  | Mus musculus    | 4.030798  | 4.217603 | 3.98473  | 6.686501 | 6.090601 | 6.164312 | 5.839653 | 6.284426 | 6.180264 |
| 17453140 | 1.13513167 | 9.35960344  | 12.641499  | 9.12E-07 | 1.07E-05 | 6.01378881 | Gusb       | ENSMUST00X  | ENSEMBL | cdna-known      | 1.869053  | 8.6414   | 8.513075 | 9.715198 | 9.654395 | 9.893847 | 9.645631 | 9.705457 | 9.790892 |
| 17389481 | 1.22461333 | 5.79078656  | 12.6339632 | 9.13E-07 | 1.07E-05 | 6.01289793 | Arhgap11a  | NM_184116   | RefSeq  | Mus musculus    | 4.831163  | 4.370142 | 4.125137 | 8.516098 | 6.470031 | 6.714153 | 6.278972 | 6.336805 | 6.447458 |
| 17470060 | 1.53176633 | 6.19205133  | 12.6285553 | 9.20E-07 | 1.08E-05 | 6.0049958  | Rassf4     | NM_178045   | RefSeq  | Mus musculus    | 3.968755  | 5.038444 | 5.277311 | 6.798193 | 5.598331 | 6.911205 | 6.59525  | 6.663849 | 6.452854 |
| 17362874 | 3.967522   | 5.95135222  | 12.6283429 | 9.20E-07 | 1.08E-05 | 6.00484856 | Msa48a     | NM_022430   | RefSeq  | Mus musculus    | 3.959408  | 4.335692 | 3.120304 | 7.088879 | 7.238987 | 8.126104 | 6.506556 | 7.033869 | 7.016371 |
| 17325884 | 3.98614667 | 5.61922211  | 12.6282342 | 9.20E-07 | 1.08E-05 | 6.00477322 | Cd200r2    | NM_206535   | RefSeq  | Mus musculus    | 2.925344  | 3.092767 | 2.659856 | 7.405464 | 7.059055 | 6.171888 | 7.425887 | 6.657036 | 7.175702 |
| 17409920 | 1.17622367 | 10.1158377  | 12.6159151 | 9.27E-07 | 1.09E-05 | 5.99623213 | Absd3      | ENSMUST00X  | ENSEMBL | cdna-known      | 9.47259   | 9.430408 | 9.269192 | 10.53573 | 10.48897 | 10.40803 | 10.49371 | 10.48279 | 10.26365 |
| 17225834 | 2.141654   | 7.68862033  | 12.6036951 | 9.34E-07 | 1.09E-05 | 5.98774946 | Hist1h2bg  | NM_178196   | RefSeq  | Mus musculus    | 6.256872  | 6.097204 | 6.326522 | 8.594093 | 8.503081 | 8.008116 | 8.536792 | 8.446428 | 8.230545 |
| 17366183 | 5.49810933 | 7.33061789  | 12.6027392 | 9.35E-07 | 1.09E-05 | 5.98708827 | ---        | ENSMUST00X  | ENSEMBL | cdna-known      | 1.377906  | 4.034757 | 4.81297  | 10.30632 | 9.686387 | 9.155581 | 7.560395 | 7.869693 | 8.080546 |
| 17469636 | 1.55296467 | 6.19080822  | 12.5964195 | 9.39E-07 | 1.10E-05 | 5.9826993  | Rad18      | NM_001167   | RefSeq  | Mus musculus    | 4.927885  | 5.180462 | 5.327719 | 6.597706 | 6.620682 | 6.875237 | 6.651217 | 6.699792 | 8.626575 |
| 17377610 | 3.01870133 | 6.66099544  | 12.571971  | 9.53E-07 | 1.11E-05 | 5.96570062 | Sdcbp2     | NM_145535   | RefSeq  | Mus musculus    | 4.372004  | 6.419914 | 9.467793 | 7.750163 | 7.15841  | 8.864222 | 7.646522 | 7.759757 | 7.492594 |
| 17297010 | 1.512102   | 10.2733782  | 12.5699727 | 9.55E-07 | 1.11E-05 | 5.96430987 | Flnb       | NM_134080   | RefSeq  | Mus musculus    | 9.554961  | 9.404764 | 9.445299 | 10.61021 | 10.48471 | 10.76901 | 10.73817 | 10.80689 | 10.65999 |
| 17223138 | 1.90880167 | 8.5327001   | 12.5689598 | 9.55E-07 | 1.11E-05 | 5.96360481 | Pgap1      | NM_001163   | RefSeq  | Mus musculus    | 7.554947  | 7.225167 | 6.880685 | 9.146319 | 9.071659 | 9.169343 | 9.318048 | 9.267056 | 9.161167 |
| 17437598 | 0.98795333 | 9.46005889  | 12.5686999 | 9.55E-07 | 1.11E-05 | 5.96360367 | 061004001R | Bc004797    | GenBank | Mus musculus    | 8.779664  | 8.941192 | 8.721358 | 9.794206 | 9.828491 | 9.783377 | 9.820589 | 9.780337 | 9.758016 |
| 17501561 | 2.53462333 | 5.45255053  | 12.5626092 | 9.59E-07 | 1.11E-05 | 5.95918325 | Cd209a     | NM_133238   | RefSeq  | Mus musculus    | 4.352179  | 3.993037 | 4.005579 | 6.40803  | 7.009903 | 6.534429 | 5.699916 | 5.720233 | 5.248532 |
| 17440275 | 2.00707733 | 6.98904192  | 12.5484547 | 9.68E-07 | 1.12E-05 | 5.94932071 | Chk2       | NM_010681   | RefSeq  | Mus musculus    | 6.032997  | 5.686337 | 5.396003 | 7.71527  | 7.752193 | 7.667394 | 7.368614 | 7.624853 | 7.681632 |
| 17533413 | 1.26415367 | 3.98911444  | 12.5406082 | 9.76E-07 | 1.13E-05 | 5.94059693 | Rap3       | Bc083134    | GenBank | Mus musculus    | 9.032684  | 9.149913 | 9.33015  | 10.43375 | 10.43375 | 10.43375 | 10.43375 | 10.43375 | 10.43375 |
| 17271639 | 1.11586733 | 9.41516611  | 12.5298945 | 9.79E-07 | 1.13E-05 | 5.93637254 | Lad1       | NM_133664   | RefSeq  | Mus musculus    | 8.67028   | 8.570241 | 8.611617 | 9.823555 | 9.67194  | 9.704245 | 9.84789  | 10.0471  | 9.789627 |
| 17390186 | 1.146601   | 8.82679511  | 12.5243989 | 9.83E-07 | 1.13E-05 | 5.93255514 | Tmem87a    | NM_173734   | RefSeq  | Mus musculus    | 7.93236   | 8.147497 | 8.206291 | 9.209447 | 9.23227  | 9.281432 | 9.178839 | 9.207869 | 9.060549 |
| 17489739 | 1.83615367 | 8.86435478  | 12.5201417 | 9.85E-07 | 1.13E-05 | 5.93017132 | 2200002D01 | ENSMUST00X  | ENSEMBL | cdna-putative   | 4.51022   | 4.802165 | 4.572764 | 6.327071 | 6.537292 | 6.220447 | 6.226688 | 6.519675 | 6.772071 |
| 17236688 | 1.77995867 | 7.55020678  | 12.5106924 | 9.92E-07 | 1.13E-05 | 5.92295754 | Tmcc3      | NM_172051   | RefSeq  | Mus musculus    | 6.321148  | 6.239405 | 6.180095 | 8.092305 | 7.930938 | 8.057362 | 8.262953 | 8.145863 | 8.721792 |
| 17219581 | 1.35056767 | 9.9702411   | 12.5029897 | 9.97E-07 | 1.14E-05 | 5.91570585 | Tagln2     | ENSMUST00X  | ENSEMBL | cdna-known      |           |          |          |          |          |          |          |          |          |



|          |            |            |            |          |          |            |              |              |         |                    |          |          |          |           |          |          |          |          |          |
|----------|------------|------------|------------|----------|----------|------------|--------------|--------------|---------|--------------------|----------|----------|----------|-----------|----------|----------|----------|----------|----------|
| 17284005 | 5.611031   | 7.73777589 | 11.0975576 | 2.58E-06 | 2.31E-05 | 4.87915004 | ---          | BC110868     | GenBank | Mus musculus       | 4.232262 | 4.573445 | 3.841912 | 10.161948 | 9.695028 | 9.166204 | 8.301913 | 7.02936  | 8.904379 |
| 17517390 | 1.51485133 | 7.65369589 | 11.0903841 | 2.59E-06 | 2.32E-05 | 4.87354729 | Idh3a        | NM_029573    | RefSeq  | Mus musculus       | 6.959741 | 6.538365 | 6.480055 | 8.196692  | 8.009258 | 8.316765 | 8.138663 | 8.07448  | 8.169244 |
| 17538011 | 0.842888   | 11.2050378 | 11.0709885 | 2.63E-06 | 2.35E-05 | 4.85838243 | ---          | ---          | ---     | ---                | 10.62611 | 10.71423 | 10.58209 | 11.42936  | 11.49491 | 11.5268  | 11.55209 | 11.52352 | 11.39866 |
| 17290324 | 1.32164033 | 7.92938689 | 11.067221  | 2.64E-06 | 2.35E-05 | 4.85543396 | Pfkfb        | ENSEMUSTO001 | ENSEMBL | cdna:known-i       | 6.989553 | 6.962378 | 6.803267 | 8.027163  | 8.282611 | 8.410345 | 8.615741 | 8.499722 | 8.773072 |
| 17529699 | 1.14307467 | 7.700155   | 11.0621181 | 2.65E-06 | 2.36E-05 | 4.85143894 | 11900022N151 | NM_001033    | RefSeq  | Mus musculus       | 7.131481 | 6.91421  | 6.845367 | 8.159069  | 8.097662 | 8.063551 | 8.010203 | 7.900147 | 8.179705 |
| 17407578 | 1.40456233 | 7.85596689 | 11.032233  | 2.71E-06 | 2.40E-05 | 4.82800863 | Tuft1        | NM_011656    | RefSeq  | Mus musculus       | 7.085646 | 6.809924 | 6.603742 | 8.232073  | 8.23441  | 8.247485 | 8.41398  | 8.403456 | 8.663955 |
| 17340017 | 0.82530433 | 9.41120289 | 11.030992  | 2.71E-06 | 2.40E-05 | 4.82703442 | Mta3         | NM_001171    | RefSeq  | Mus musculus       | 8.79147  | 7.575392 | 8.766616 | 9.607477  | 9.705218 | 9.496966 | 9.830321 | 9.831511 | 8.95144  |
| 17307280 | 2.39538367 | 6.58839478 | 11.072369  | 2.71E-06 | 2.41E-05 | 4.82416452 | Gm4902       | NM_001164    | RefSeq  | Mus musculus       | 5.20314  | 5.090093 | 4.453937 | 7.022398  | 7.353781 | 7.539142 | 7.498021 | 7.39519  | 7.757851 |
| 17550687 | 1.81284867 | 5.41792256 | 11.0259662 | 2.72E-06 | 2.41E-05 | 4.82308806 | ---          | ---          | ---     | ---                | 3.923814 | 3.548629 | 3.66908  | 5.216672  | 5.639508 | 5.723889 | 7.102139 | 6.791947 | 7.145625 |
| 17537088 | 0.83604333 | 11.4611256 | 11.0310162 | 2.73E-06 | 2.42E-05 | 4.81762817 | Pgk1         | NM_008828    | RefSeq  | Mus musculus       | 10.91237 | 10.93543 | 10.92026 | 11.02267  | 11.2752  | 11.9214  | 11.73763 | 11.71788 | 11.55017 |
| 17502781 | 0.84200567 | 7.54259556 | 11.0161409 | 2.77E-06 | 2.44E-05 | 4.8305646  | Ampa10       | NM_020694    | RefSeq  | // Re Mus musculus | 7.056543 | 6.949047 | 7.015409 | 7.946065  | 7.851116 | 7.761205 | 7.793576 | 7.758433 | 7.765619 |
| 17408509 | 0.74371667 | 11.749993  | 10.9845957 | 2.80E-06 | 2.47E-05 | 4.79054904 | Atp1a1       | NM_144900    | RefSeq  | Mus musculus       | 11.24591 | 11.25621 | 11.28151 | 12.00208  | 11.97829 | 12.03441 | 12.05085 | 11.99116 | 11.98908 |
| 17501346 | 1.857257   | 9.9680181  | 10.9856521 | 2.83E-06 | 2.49E-05 | 4.77789817 | Mfap3j       | NM_027756    | RefSeq  | Mus musculus       | 4.352293 | 4.880877 | 4.538536 | 6.450786  | 6.428785 | 6.463816 | 6.817898 | 6.59977  | 1.77912  |
| 17420561 | 0.92030333 | 7.81128911 | 10.9568738 | 2.86E-06 | 2.51E-05 | 4.76867076 | Tmco4        | NM_029857    | RefSeq  | Mus musculus       | 7.322262 | 7.097243 | 7.166606 | 8.213968  | 8.059326 | 8.073727 | 8.146164 | 8.135941 | 8.08365  |
| 17412534 | 1.31921433 | 7.27705111 | 10.9497157 | 2.87E-06 | 2.53E-05 | 4.76301535 | Lymr2        | NM_175364    | RefSeq  | Mus musculus       | 6.536493 | 6.425304 | 6.198845 | 7.738897  | 7.710392 | 7.605236 | 7.702375 | 7.609622 | 7.609622 |
| 17410114 | 2.1794     | 5.42888622 | 10.9429082 | 2.89E-06 | 2.53E-05 | 4.75763389 | Ugt8a        | NM_011674    | RefSeq  | Mus musculus       | 4.100368 | 4.567856 | 4.037953 | 6.311017  | 6.107824 | 6.825536 | 5.876785 | 5.806228 | 5.712409 |
| 17461124 | 0.86826767 | 9.51070656 | 10.9276157 | 2.92E-06 | 2.56E-05 | 4.74553379 | Arli6p5      | ENSEMUSTO001 | ENSEMBL | cdna:known-i       | 8.954737 | 8.979186 | 8.808325 | 9.799269  | 9.697863 | 9.849919 | 9.781911 | 9.847937 | 8.972756 |
| 17483925 | 3.71102167 | 6.08162378 | 10.9161268 | 2.94E-06 | 2.58E-05 | 4.73643326 | Dmbt1        | NM_007769    | RefSeq  | Mus musculus       | 4.148671 | 3.101879 | 3.445805 | 7.267939  | 7.69686  | 7.746621 | 7.100644 | 7.208488 | 8.89707  |
| 17240357 | 0.96414    | 8.53714967 | 10.9144682 | 2.95E-06 | 2.58E-05 | 4.73511875 | Gtf3c6       | NM_026613    | RefSeq  | Mus musculus       | 7.953798 | 7.951383 | 7.689664 | 8.880694  | 8.790148 | 8.823673 | 8.932379 | 8.895378 | 8.918403 |
| 17444961 | 2.28823967 | 7.34945033 | 10.9106047 | 2.95E-06 | 2.59E-05 | 4.73205608 | Alox5ap      | NM_009663    | RefSeq  | Mus musculus       | 6.152618 | 5.806451 | 5.571077 | 8.206689  | 8.080258 | 8.208008 | 7.780905 | 8.474442 | 7.764515 |
| 17398274 | 1.139843   | 6.528711   | 10.9707112 | 2.96E-06 | 2.59E-05 | 4.72936514 | Psm71        | ENSEMUSTO001 | ENSEMBL | cdna:known-i       | 5.791474 | 5.904741 | 5.674931 | 7.072033  | 6.719108 | 6.899534 | 6.841606 | 7.037603 | 6.917367 |
| 17498398 | 1.249492   | 9.17486533 | 10.8962633 | 2.98E-06 | 2.61E-05 | 4.72067879 | Cttn         | ENSEMUSTO001 | ENSEMBL | cdna:known-i       | 8.527885 | 8.323044 | 8.25938  | 9.686875  | 9.534163 | 9.634305 | 9.740917 | 9.848911 | 9.38175  |
| 17267430 | 1.227234   | 10.5636009 | 10.8801294 | 3.02E-06 | 2.63E-05 | 4.70786335 | Gdpd1        | NM_025638    | RefSeq  | Mus musculus       | 9.92711  | 9.577597 | 9.808311 | 11.01944  | 11.02971 | 11.00211 | 11.00013 | 10.73863 | 11.02591 |
| 17453819 | 2.002817   | 5.820801   | 10.8698341 | 3.04E-06 | 2.65E-05 | 4.69967665 | Serpine1     | NM_008871    | RefSeq  | Mus musculus       | 4.466465 | 4.137804 | 4.67707  | 6.527814  | 6.429294 | 6.326822 | 6.496077 | 6.981966 | 6.358087 |
| 17241934 | 1.79786167 | 7.94519111 | 10.8657727 | 3.05E-06 | 2.65E-05 | 4.69644523 | Gatt1        | NM_008185    | RefSeq  | Mus musculus       | 6.867052 | 6.879947 | 6.719519 | 8.626296  | 8.845585 | 8.388222 | 8.118793 | 8.348663 | 8.712643 |
| 17241396 | 0.92696367 | 9.06950267 | 10.8495691 | 3.05E-06 | 2.68E-05 | 4.6835419  | Vps26a       | NM_133672    | RefSeq  | Mus musculus       | 8.469917 | 8.46074  | 8.232985 | 9.245398  | 9.343764 | 9.446371 | 9.496765 | 9.353219 | 9.485305 |
| 17287827 | 1.643629   | 7.91851411 | 10.8455673 | 3.10E-06 | 2.69E-05 | 4.68032521 | Tgfb1        | NM_009369    | RefSeq  | Mus musculus       | 7.121178 | 6.481796 | 7.012407 | 8.454328  | 8.33552  | 8.341989 | 8.421589 | 8.3412   | 8.3412   |
| 17264176 | 1.26795133 | 9.98679478 | 10.8450406 | 3.10E-06 | 2.69E-05 | 4.67932168 | Ankr1d       | NM_013468    | RefSeq  | Mus musculus       | 5.398089 | 5.407593 | 5.255195 | 6.472709  | 6.710777 | 6.672245 | 5.798807 | 6.198577 | 5.976161 |
| 17367216 | 1.73820067 | 8.0391246  | 10.8398677 | 3.11E-06 | 2.69E-05 | 4.67580823 | Plncd2       | ENSEMUSTO001 | ENSEMBL | cdna:known-i       | 6.997919 | 6.890118 | 6.575139 | 8.470428  | 8.726092 | 8.481258 | 8.573147 | 9.0432   | 8.559513 |
| 17391734 | 0.90908767 | 7.48877844 | 10.8269801 | 3.14E-06 | 2.71E-05 | 4.66552489 | 4930402H24   | BC052447     | GenBank | Mus musculus       | 6.893418 | 6.794799 | 6.71224  | 7.889103  | 7.64681  | 7.783007 | 7.910894 | 7.92834  | 7.788595 |
| 17401357 | 1.39031633 | 8.10647556 | 10.8196662 | 3.16E-06 | 2.72E-05 | 4.65968414 | Rhoc         | NM_007484    | RefSeq  | Mus musculus       | 7.117085 | 7.185482 | 7.393003 | 8.475531  | 8.62178  | 8.769343 | 8.375438 | 8.32855  | 8.692068 |
| 17519821 | 1.19344267 | 9.40546978 | 10.8157486 | 3.17E-06 | 2.73E-05 | 4.65554049 | Myo6         | NM_001039    | RefSeq  | Mus musculus       | 5.845651 | 6.815607 | 6.58635  | 9.86646   | 9.74749  | 9.716896 | 9.973635 | 9.987317 | 6.96912  |
| 17427652 | 0.89966333 | 10.7694722 | 10.8147455 | 3.17E-06 | 2.73E-05 | 4.65575251 | Utrn         | NM_011715    | RefSeq  | Mus musculus       | 10.26542 | 10.19946 | 10.0602  | 11.1106   | 10.99465 | 11.12342 | 11.0131  | 11.02376 | 11.13924 |
| 17212355 | 1.0620967  | 6.89047389 | 10.8015595 | 3.20E-06 | 2.75E-05 | 4.64520904 | Nck2         | NM_007618    | RefSeq  | Mus musculus       | 6.111589 | 6.111331 | 6.084255 | 7.292723  | 7.154831 | 7.182551 | 7.534404 | 7.149919 | 7.388361 |
| 17420125 | 1.188422   | 7.53291111 | 10.7875956 | 3.23E-06 | 2.77E-05 | 4.63403106 | Luzp1        | NM_024452    | RefSeq  | Mus musculus       | 6.807076 | 6.783108 | 6.482956 | 8.033476  | 7.757826 | 7.795078 | 8.093436 | 8.004153 | 8.091105 |
| 17493739 | 1.30778133 | 7.96609922 | 10.7863803 | 3.23E-06 | 2.77E-05 | 4.63305764 | Pold3        | ENSEMUSTO001 | ENSEMBL | cdna:known-i       | 7.343479 | 6.871088 | 7.130356 | 8.446571  | 8.436139 | 8.395977 | 8.473414 | 8.216674 | 8.216674 |
| 17551169 | 2.50845567 | 5.99505211 | 10.7826199 | 3.24E-06 | 2.78E-05 | 4.63004486 | ---          | ---          | ---     | ---                | 3.781991 | 4.116296 | 3.84753  | 6.058197  | 6.39804  | 6.814917 | 7.585644 | 7.300887 | 8.051967 |
| 17324163 | 0.20213097 | 6.80596899 | 10.7773401 | 3.26E-06 | 2.78E-05 | 4.62581336 | Ephb3        | ENSEMUSTO001 | ENSEMBL | cdna:known-i       | 5.644526 | 5.103608 | 5.578931 | 7.659976  | 7.218203 | 7.519575 | 7.771431 | 7.720128 | 7.720128 |
| 17296084 | 1.104137   | 8.23508    | 10.7741958 | 3.26E-06 | 2.78E-05 | 4.62329238 | Zwintm6      | NM_145456    | RefSeq  | Mus musculus       | 7.617172 | 7.308935 | 7.475309 | 8.687378  | 8.591225 | 8.489772 | 8.647196 | 8.601698 | 8.62487  |
| 17320143 | 1.35558633 | 7.28559267 | 10.7706822 | 3.27E-06 | 2.79E-05 | 4.6204746  | Cerk         | NM_145475    | RefSeq  | Mus musculus       | 6.443351 | 6.264949 | 6.195343 | 7.579885  | 7.69278  | 7.694419 | 7.626853 | 8.06358  | 8.005496 |
| 17477670 | 0.749988   | 10.4466673 | 10.7680041 | 3.28E-06 | 2.79E-05 | 4.61835627 | Rras         | NM_009101    | RefSeq  | Mus musculus       | 9.91565  | 9.948774 | 9.912952 | 10.63662  | 10.67191 | 10.71881 | 10.6697  | 10.7276  | 10.81799 |
| 17347210 | 0.95042133 | 7.066279   | 10.7672321 | 3.28E-06 | 2.79E-05 | 4.61770897 | Memo1        | NM_133771    | RefSeq  | Mus musculus       | 6.37265  | 6.380117 | 6.412738 | 7.390847  | 7.315883 | 7.238039 | 7.357443 | 7.554835 | 7.609959 |
| 17286365 | 1.763333   | 7.909747   | 10.7656489 | 3.28E-06 | 2.79E-05 | 4.614178   | Serp1b5      | ENSEMUSTO001 | ENSEMBL | cdna:known-i       | 7.001305 | 6.418512 | 6.432176 | 8.477094  | 8.109953 | 8.444935 | 8.807175 | 8.787917 | 8.805856 |
| 17519521 | 1.16927033 | 7.5079705  | 10.7623844 | 3.28E-06 | 2.79E-05 | 4.614178   | ---          | ---          | ---     | ---                | 6.953733 | 6.745987 | 7.51838  | 8.106702  | 8.01922  | 8.39078  | 7.853181 | 7.97619  |          |
| 17346078 | 0.92423333 | 10.3983144 | 10.75944   | 3.30E-06 | 2.80E-05 | 4.6135231  | Stap2        | NM_145934    | RefSeq  | Mus musculus       | 9.735022 | 9.735024 | 9.812454 | 10.65079  | 10.60274 | 10.80169 | 10.6321  | 10.78267 | 10.8322  |
| 17524107 | 0.922159   | 7.20802089 | 10.750946  | 3.32E-06 | 2.81E-05 | 4.60463151 | Panx1        | ENSEMUSTO001 | ENSEMBL | cdna:known-i       | 6.537034 | 6.59747  | 6.736272 | 7.591324  | 7.513916 | 7.520213 | 7.567095 | 7.542226 | 7.442834 |
| 17267066 | 0.7413567  | 8.80129578 | 10.741032  | 3.34E-06 | 2.82E-05 | 4.59832852 | Dhrs17       | NM_177564    | RefSeq  | Mus musculus       | 8.367652 | 8.388387 | 8.312607 | 9.038387  | 9.139945 | 9.212721 | 9.208987 | 9.197269 | 9.245707 |
| 17211700 | 0.86052433 | 8.14040733 | 10.7421145 | 3.34E-06 | 2.82E-05 | 4.59753371 | Imp4         | NM_178601    | RefSeq  | Mus musculus       | 7.495759 | 7.666249 | 7.624568 | 8.39388   | 8.483144 | 8.491179 | 8.326399 | 8.318048 | 8.46444  |
| 17276934 | 3.128268   | 5.29020311 | 10.7315754 | 3.37E-06 | 2.84E-05 | 4.58905656 | Ticr1        | NM_001033    | RefSeq  | Mus musculus       | 3.046624 | 3.212061 | 3.186702 | 6.163126  | 6.147157 | 5.925708 | 6.561167 | 6.592918 | 8.5      |

|           |            |            |             |          |          |            |            |            |         |                    |           |          |          |          |          |          |          |          |          |
|-----------|------------|------------|-------------|----------|----------|------------|------------|------------|---------|--------------------|-----------|----------|----------|----------|----------|----------|----------|----------|----------|
| 17289695  | 1.11879967 | 7.55343922 | 10.35252524 | 4.47E-06 | 3.50E-05 | 4.27890416 | 2810008M24 | ENSMUSTOXX | ENSEMBL | cdna:known         | 7.054272  | 6.737869 | 6.862476 | 7.982291 | 7.957555 | 8.07117  | 7.702374 | 7.941453 | 7.671493 |
| 17402936  | 1.32980567 | 10.5496459 | 10.3509344  | 4.48E-06 | 3.50E-05 | 4.27780903 | Slc39a8    | NM_0011351 | RefSeq  | Mus musculus       | 9.977878  | 9.42452  | 6.696515 | 11.06564 | 11.00654 | 11.01615 | 10.86215 | 9.977878 | 10.01386 |
| 17279670  | 1.271815   | 6.996244   | 10.3454135  | 4.49E-06 | 3.51E-05 | 4.27322048 | Rapgef5    | NM_175930  | RefSeq  | Mus musculus       | 6.325769  | 6.057433 | 5.985959 | 7.426306 | 7.43957  | 7.31873  | 7.618805 | 7.256919 | 7.536705 |
| 17289660  | 0.914211   | 7.52177633 | 10.34049285 | 4.51E-06 | 3.52E-05 | 4.26949133 | Dimt1      | NM_025447  | RefSeq  | Mus musculus       | 6.084416  | 6.892491 | 7.792125 | 8.704006 | 7.986442 | 7.611312 | 7.704887 | 7.828875 | 7.828875 |
| 17408826  | 1.85150667 | 6.55109956 | 10.3404466  | 4.51E-06 | 3.52E-05 | 4.2691055  | Aacab      | ENSMUSTOXX | ENSEMBL | cdna:novel         | 4.526543  | 4.491278 | 4.219363 | 6.538348 | 6.309123 | 5.945133 | 5.992092 | 6.052482 | 6.060664 |
| 17395512  | 0.77987167 | 9.72498789 | 10.3387711  | 4.52E-06 | 3.52E-05 | 4.267697   | Lama5      | NM_0010811 | RefSeq  | Mus musculus       | 9.186667  | 9.182822 | 9.234983 | 9.984537 | 9.98635  | 9.9732   | 10.07589 | 10.48251 | 9.867632 |
| 17278200  | 1.75840767 | 9.93105122 | 10.3370268  | 4.52E-06 | 3.53E-05 | 4.26625494 | Ifi2711    | NM_026790  | RefSeq  | Mus musculus       | 7.948813  | 7.470315 | 7.946937 | 9.488487 | 9.601578 | 9.551223 | 9.456627 | 9.173933 | 9.741548 |
| 17232534  | 1.07507633 | 9.35905656 | 10.3326886  | 4.56E-06 | 3.54E-05 | 4.25779156 | Frk        | NM_0011591 | RefSeq  | Mus musculus       | 8.755621  | 8.775314 | 8.633575 | 9.904001 | 9.70619  | 9.779548 | 9.669173 | 9.647236 | 9.360851 |
| 17234647  | 2.70323367 | 6.33408967 | 10.3267506  | 4.56E-06 | 3.54E-05 | 4.257693   | Iltgib2    | ENSMUSTOXX | ENSEMBL | cdna:novel         | 5.23508   | 4.033475 | 4.50546  | 7.316343 | 7.219152 | 7.348221 | 7.035815 | 7.340703 | 9.672558 |
| 17252928  | 1.3252867  | 8.21122444 | 10.3258295  | 4.56E-06 | 3.54E-05 | 4.25692629 | Hjupr      | NM_198652  | RefSeq  | Mus musculus       | 7.572924  | 7.573612 | 7.526866 | 8.831434 | 8.710203 | 8.545938 | 8.231109 | 8.56768  | 8.357862 |
| 17500653  | 1.300867   | 8.83671456 | 10.3228862  | 4.57E-06 | 3.55E-05 | 4.25447506 | Alnc1      | ENSMUSTOXX | ENSEMBL | cdna:known         | 8.246356  | 7.802145 | 8.107651 | 9.409259 | 9.366138 | 9.283346 | 9.262403 | 8.92403  | 8.971245 |
| 17234926  | 0.68208667 | 10.9630011 | 10.3170072  | 4.59E-06 | 3.56E-05 | 4.24957174 | Rtg        | NM_009768  | RefSeq  | Mus musculus       | 10.55694  | 10.51031 | 10.49714 | 11.21204 | 11.2351  | 11.16351 | 11.12261 | 11.15236 | 11.217   |
| 17451443  | 0.95072467 | 9.376633   | 10.3040942  | 4.64E-06 | 3.59E-05 | 4.23881029 | Coro1c     | NM_011779  | RefSeq  | Mus musculus       | 8.78192   | 8.825584 | 8.58505  | 9.70988  | 9.715776 | 9.619072 | 9.721667 | 9.608433 | 9.823219 |
| 17287555  | 0.80986967 | 6.07634133 | 10.3011773  | 4.65E-06 | 3.59E-05 | 4.23637654 | Unc5a      | NM_153131  | RefSeq  | Mus musculus       | 6.663817  | 5.714064 | 6.679835 | 6.515117 | 6.419636 | 6.556172 | 6.097053 | 6.115887 | 9.292901 |
| 17371019  | 1.113326   | 7.61732511 | 10.2838362  | 4.71E-06 | 3.63E-05 | 4.22189527 | Tanc1      | NM_198294  | RefSeq  | Mus musculus       | 6.919622  | 6.934693 | 6.695793 | 8.053337 | 8.028364 | 7.808115 | 8.175337 | 7.939858 | 8.000807 |
| 17300247  | 2.847875   | 6.58256811 | 10.2768123  | 4.74E-06 | 3.65E-05 | 4.21602352 | Trav9d-3   | X01134     | GenBank | M.musculus         | 5.392342  | 4.528871 | 4.647157 | 7.742142 | 7.600786 | 7.769067 | 6.971333 | 6.888944 | 7.742471 |
| 17348320  | 1.92752067 | 5.43358311 | 10.2741477  | 4.75E-06 | 3.65E-05 | 4.21379517 | Greb1      | NM_0010831 | RefSeq  | Mus musculus       | 3.804049  | 3.923866 | 4.160444 | 5.866733 | 5.12635  | 6.3899   | 6.180226 | 6.3889   | 6.80567  |
| 17315878  | 1.62337233 | 6.57176111 | 10.2735411  | 4.75E-06 | 3.65E-05 | 4.21328774 | Skp2       | NM_145468  | RefSeq  | Mus musculus       | 5.783969  | 5.185966 | 5.515056 | 6.982136 | 7.123363 | 7.249609 | 6.935138 | 7.106228 | 7.264835 |
| 17405549  | 2.031147   | 7.03892633 | 10.2693967  | 4.76E-06 | 3.66E-05 | 4.20982063 | P1ch1      | ENSMUSTOXX | ENSEMBL | cdna:known         | 6.138106  | 5.951978 | 5.733973 | 7.833528 | 7.533973 | 7.753235 | 7.838872 | 7.802551 | 7.87359  |
| 17459236  | 1.82980867 | 6.754356   | 10.2650961  | 4.78E-06 | 3.67E-05 | 4.20622143 | Mad2l1     | NM_019499  | RefSeq  | Mus musculus       | 5.922706  | 5.49856  | 5.223384 | 7.214285 | 7.307695 | 7.612096 | 7.235905 | 7.439045 | 7.335528 |
| 17386514  | 1.01976567 | 10.2486159 | 10.2631445  | 4.79E-06 | 3.67E-05 | 4.2045877  | Gpr155     | ENSMUSTOXX | ENSEMBL | cdna:known         | 6.91696   | 5.988707 | 5.398966 | 10.56925 | 10.69343 | 10.40425 | 10.62829 | 10.72683 | 10.60786 |
| 17336432  | 1.92201633 | 8.72416544 | 10.2600276  | 4.80E-06 | 3.68E-05 | 4.20197796 | Tapi       | NM_013683  | RefSeq  | Mus musculus       | 7.400919  | 7.172632 | 7.751595 | 9.405131 | 9.408489 | 9.27575  | 9.157621 | 9.197645 | 9.745882 |
| 17302869  | 1.11221367 | 8.15305656 | 10.2538515  | 4.82E-06 | 3.69E-05 | 4.19680463 | Cytlb      | NM_029356  | RefSeq  | Mus musculus       | 7.439147  | 7.159337 | 7.369329 | 8.39948  | 8.340676 | 8.594898 | 8.595988 | 8.656146 | 8.823318 |
| 17393664  | 1.76898667 | 6.06131856 | 10.2396093  | 4.87E-06 | 3.73E-05 | 4.18486444 | Myb        | NM_0011981 | RefSeq  | Mus musculus       | 5.219245  | 4.504359 | 4.552157 | 6.658546 | 6.760132 | 6.703283 | 6.389513 | 6.449104 | 6.776288 |
| 17211258  | 1.225154   | 8.13017911 | 10.2353082  | 4.89E-06 | 3.74E-05 | 4.18125564 | Rdh10      | ENSMUSTOXX | ENSEMBL | cdna:known         | 7.459055  | 7.134353 | 7.500325 | 8.699281 | 8.645412 | 8.424952 | 8.519323 | 8.363189 | 8.425272 |
| 17408052  | 2.262346   | 9.18025867 | 10.2298908  | 4.91E-06 | 3.75E-05 | 4.17670843 | Terc       | NM_001179  | RefSeq  | Mus musculus       | 7.915805  | 7.06967  | 7.936324 | 9.747112 | 10.03731 | 9.863415 | 9.837942 | 10.10178 | 10.09567 |
| 1702754   | 0.87454133 | 9.63295133 | 10.2158822  | 4.96E-06 | 3.78E-05 | 4.16426747 | Obud4      | NM_001256  | RefSeq  | Mus musculus       | 9.129355  | 8.94255  | 8.998603 | 9.985772 | 9.838792 | 9.89533  | 9.984541 | 10.0614  | 9.886071 |
| 17400813  | 0.96143167 | 9.19071578 | 10.2150688  | 4.97E-06 | 3.78E-05 | 4.16425621 | Notch2     | NM_010928  | RefSeq  | Mus musculus       | 8.547359  | 8.474819 | 8.592739 | 9.607365 | 9.480247 | 9.4116   | 9.612222 | 9.617555 | 9.372536 |
| 17372820  | 2.273836   | 8.12607678 | 10.2113832  | 4.97E-06 | 3.79E-05 | 4.16322163 | Phid1a     | NM_009344  | RefSeq  | Mus musculus       | 6.090592  | 6.328635 | 7.026517 | 8.710005 | 8.727029 | 9.127218 | 8.918442 | 8.984241 | 9.220212 |
| 17378827  | 2.09585733 | 9.43946122 | 10.2048862  | 5.02E-06 | 3.82E-05 | 4.15197453 | Lpb        | NM_008489  | RefSeq  | Mus musculus       | 8.304168  | 7.708706 | 8.225404 | 10.0749  | 10.00509 | 10.48186 | 9.883919 | 10.33202 | 9.903084 |
| 173718261 | 1.5464803  | 6.15018289 | 10.1981594  | 5.03E-06 | 3.82E-05 | 4.15003095 | Ncf2       | NM_010877  | RefSeq  | Mus musculus       | 5.023942  | 5.181404 | 5.414187 | 6.708675 | 6.870661 | 6.679638 | 6.398582 | 6.795561 | 6.278996 |
| 17262227  | 0.80316533 | 9.18062711 | 10.1945059  | 5.05E-06 | 3.83E-05 | 4.14657151 | Cnot6      | NM_211484  | RefSeq  | Mus musculus       | 6.894922  | 6.856404 | 6.541642 | 9.387122 | 9.465036 | 9.450306 | 9.378489 | 9.941499 | 9.577164 |
| 17544960  | 0.807504   | 8.44953089 | 10.1856316  | 5.08E-06 | 3.85E-05 | 4.13947847 | Psmid10    | NM_016883  | RefSeq  | Mus musculus       | 7.886558  | 7.946215 | 7.852836 | 8.768166 | 8.600681 | 8.739274 | 8.663321 | 8.766729 | 8.821998 |
| 17413500  | 1.92526067 | 6.02572211 | 10.1826755  | 5.09E-06 | 3.85E-05 | 4.13696881 | Glipr2     | ENSMUSTOXX | ENSEMBL | cdna:known         | 5.395172  | 4.817851 | 4.812271 | 6.549925 | 6.548373 | 6.85     | 6.569475 | 6.378905 | 6.345523 |
| 17312209  | 1.02413    | 12.1338389 | 10.1765813  | 5.11E-06 | 3.86E-05 | 4.13184804 | Ly6e       | NM_001164  | RefSeq  | Mus musculus       | 11.52352  | 11.29823 | 11.66666 | 12.57279 | 12.43394 | 12.55407 | 12.38101 | 12.43324 | 12.38609 |
| 17501041  | 1.33296767 | 6.568479   | 10.1677424  | 5.15E-06 | 3.88E-05 | 4.1243902  | Casp3      | NM_008360  | RefSeq  | Mus musculus       | 5.790863  | 5.78634  | 5.939866 | 6.958154 | 6.916513 | 7.05305  | 6.904092 | 7.051798 | 7.21399  |
| 17464539  | 0.30619167 | 6.04204889 | 10.1581142  | 5.19E-06 | 3.90E-05 | 4.11625984 | Hepacam2   | NM_178899  | RefSeq  | Mus musculus       | 4.624192  | 3.968099 | 3.985218 | 7.391315 | 7.337379 | 6.95739  | 7.368861 | 6.949818 | 6.251168 |
| 17303373  | 2.116965   | 5.76689527 | 10.1420389  | 5.25E-06 | 3.94E-05 | 4.10267022 | ---        | ENSMUSTOXX | ENSEMBL | cdna:known         | 4.477177  | 4.541966 | 4.261892 | 6.546131 | 6.456163 | 6.629636 | 6.615467 | 6.589189 | 5.784436 |
| 1747331   | 5.65333367 | 9.7934931  | 10.1408689  | 5.26E-06 | 3.94E-05 | 4.10168046 | Pglyrpl1   | NM_009402  | RefSeq  | Mus musculus       | 6.660261  | 4.543934 | 7.144604 | 11.65316 | 11.8298  | 11.82584 | 11.3469  | 11.55918 | 11.57957 |
| 17396733  | 1.194575   | 8.29325156 | 10.1398959  | 5.26E-06 | 3.94E-05 | 4.1008572  | Actf6a     | NM_019673  | RefSeq  | Mus musculus       | 7.704279  | 7.347213 | 7.338301 | 8.556141 | 8.672687 | 8.74469  | 8.639517 | 8.855768 | 8.780668 |
| 17352036  | 1.867739   | 7.66209844 | 10.1374266  | 5.27E-06 | 3.95E-05 | 4.09876764 | Ptsp1p2    | NM_013381  | RefSeq  | // Re Mus musculus | 6.657102  | 6.050577 | 6.433044 | 8.289491 | 8.108864 | 8.348635 | 8.046677 | 8.42046  | 6.808586 |
| 17464367  | 0.81077667 | 7.95988444 | 10.1354498  | 5.28E-06 | 3.95E-05 | 4.0970946  | Pf1p1p1    | NM_001170  | RefSeq  | Mus musculus       | 7.315483  | 7.354559 | 7.519257 | 8.183987 | 8.179602 | 8.25804  | 8.204113 | 8.308279 | 8.31384  |
| 17389895  | 1.18151367 | 8.16171033 | 10.1340148  | 5.29E-06 | 3.95E-05 | 4.09590272 | Qwer1      | NM_0011231 | RefSeq  | Mus musculus       | 7.141625  | 7.543707 | 7.156488 | 8.555296 | 8.430525 | 8.746167 | 8.781652 | 8.628765 | 8.776455 |
| 17466037  | 1.53419867 | 6.0334944  | 10.103554   | 5.34E-06 | 3.99E-05 | 4.08430674 | Cm10186    | XR_104972  | RefSeq  | PREDICTED          | 5.321277  | 4.844505 | 4.920484 | 6.6234   | 6.66523  | 6.386302 | 6.630302 | 6.366733 | 6.366733 |
| 17226420  | 0.72028333 | 10.7609167 | 10.0867697  | 5.49E-06 | 4.09E-05 | 4.05410294 | Ctr2       | NM_023755  | RefSeq  | Mus musculus       | 10.355225 | 10.29472 | 10.1971  | 11.60687 | 10.98621 | 10.95784 | 10.91759 | 10.9972  | 10.98447 |
| 17498467  | 0.77998667 | 10.89603   | 10.0838694  | 5.50E-06 | 4.09E-05 | 4.05318446 | Ano1       | NM_178642  | RefSeq  | Mus musculus       | 10.29862  | 10.32396 | 10.43417 | 11.22978 | 11.06351 | 11.0882  | 11.2087  | 11.244   | 11.14731 |
| 17402584  | 2.22478733 | 9.60055567 | 10.081015   | 5.51E-06 | 4.09E-05 | 4.0509669  | Apobec1    | NM_031159  | RefSeq  | Mus musculus       | 5.498736  | 5.111756 | 5.763191 | 7.621469 | 7.743506 | 7.76237  | 7.243393 | 7.896661 | 8.023219 |
| 17515035  | 1.363352   | 6.6280841  | 10.0683219  | 5.56E-06 | 4.13E-05 | 4.04010975 | A23005OP20 | NM_175687  | RefSeq  | Mus musculus       | 5.4031    | 5.747507 | 5.827557 | 7.089097 | 7.109303 | 6.6382   | 7.172213 | 7.063257 | 7.370903 |
| 17407412  | 2.64241133 | 9.51185956 | 10.0537299  | 5.61E-06 | 4.16E-05 | 4.03074699 | Spr1a      | NM_009264  | RefSeq  | Mus                |           |          |          |          |          |          |          |          |          |









|           |            |            |            |          |             |             |             |            |         |              |            |          |             |          |          |          |          |          |          |          |
|-----------|------------|------------|------------|----------|-------------|-------------|-------------|------------|---------|--------------|------------|----------|-------------|----------|----------|----------|----------|----------|----------|----------|
| 17281880  | 1.696757   | 8.71625356 | 7.77117967 | 4.06E-05 | 0.0001921   | 1.86502554  | Six1        | NM_009189  | RefSeq  | Mus musculus | 8.043219   | 7.042915 | 7.604679    | 9.348696 | 9.321109 | 9.111279 | 9.261955 | 9.273434 | 9.438996 |          |
| 17512860  | 0.74582267 | 8.21661389 | 7.696507   | 4.06E-05 | 0.00019232  | 1.86341366  | Marveld3    | NM_028584  | RefSeq  | Mus musculus | 7.79927    | 7.600363 | 7.66625     | 8.517307 | 8.426558 | 8.371486 | 8.4054   | 8.482229 | 8.680662 |          |
| 17449517  | 1.21294267 | 7.90251211 | 7.76736943 | 4.07E-05 | 0.00019261  | 1.86100823  | ---         | ---        | ---     | ---          | 6.918717   | 7.414273 | 6.899387    | 8.380258 | 8.218575 | 8.272822 | 8.243855 | 8.566941 | 8.207331 |          |
| 17439367  | 1.604745   | 8.73031933 | 7.7540544  | 4.12E-05 | 0.0001947   | 1.86494815  | Cxcl13      | NM_018866  | RefSeq  | Mus musculus | 7.647837   | 6.867466 | 6.650673    | 9.473772 | 9.630075 | 8.976644 | 8.841727 | 10.06098 | 9.52342  |          |
| 17284356  | 5.22549267 | 9.25530389 | 7.7526165  | 4.13E-05 | 0.00019477  | 1.84545516  | Igh-VJ558   | BC019569   | GenBank | Mus musculus | 5.808304   | 5.286455 | 7.153663    | 12.00007 | 10.98176 | 10.94307 | 11.42744 | 7.955153 | 10.70143 |          |
| 17334080  | 1.085206   | 6.60883467 | 7.7446494  | 4.16E-05 | 0.00019602  | 1.873702184 | Ccdc64b     | NM_153784  | RefSeq  | Mus musculus | 5.70083    | 5.759245 | 5.925616    | 6.696612 | 6.928438 | 7.043259 | 6.925781 | 7.890547 | 7.376574 |          |
| 17329105  | 1.356058   | 6.57131944 | 7.7394942  | 4.18E-05 | 0.00019686  | 1.83152417  | Abcc5       | NM_013790  | RefSeq  | Mus musculus | 5.768663   | 5.322043 | 5.983985    | 7.269622 | 7.001472 | 6.879971 | 7.096124 | 6.972591 | 6.839204 |          |
| 17254295  | 5.14669833 | 9.00843522 | 7.7288713  | 4.23E-05 | 0.00019856  | 1.82024331  | Expi        | NM_007969  | RefSeq  | Mus musculus | 5.630642   | 5.320265 | 6.834843    | 11.06774 | 11.21539 | 9.647531 | 10.72254 | 10.82048 | 11.11167 |          |
| 17548042  | 0.65041867 | 7.91209111 | 7.72795288 | 4.23E-05 | 0.00019866  | 1.81935155  | Galm1       | NM_013814  | RefSeq  | Mus musculus | 7.628619   | 7.431561 | 7.480366    | 8.131239 | 8.092919 | 8.273314 | 8.05887  | 8.101954 | 8.004308 |          |
| 17405099  | 0.69507767 | 7.7073333  | 7.7103296  | 4.30E-05 | 0.00020135  | 1.80249259  | Erf2        | ENSMUST00T | ENSEMBL | cDNA:known   | 7.572304   | 7.330426 | 7.407752    | 8.21076  | 8.074871 | 8.109768 | 8.243793 | 8.149874 | 8.064066 |          |
| 17469596  | 0.63349067 | 7.91597718 | 7.70518591 | 4.32E-05 | 0.00020264  | 1.79522976  | Elf2        | NM_025785  | RefSeq  | Mus musculus | 7.565328   | 7.57605  | 7.409846    | 8.156603 | 8.155653 | 8.139434 | 8.017773 | 8.201378 | 8.021791 |          |
| 17401308  | 0.643745   | 6.80452444 | 7.7044295  | 4.32E-05 | 0.00020248  | 1.79442746  | Phtf1       | NM_001163  | RefSeq  | Mus musculus | 6.838466   | 6.472861 | 6.252012    | 7.067329 | 6.960163 | 7.023267 | 7.110323 | 7.020297 | 6.957129 |          |
| 17494101  | 1.18270067 | 9.2447833  | 7.76825587 | 4.42E-05 | 0.00020613  | 1.77119023  | Trim21      | NM_009277  | RefSeq  | Mus musculus | 7.225335   | 7.060346 | 7.411922    | 8.332794 | 8.685644 | 7.272677 | 8.262096 | 7.901943 | 8.212958 |          |
| 17290932  | 1.49896333 | 8.72735956 | 6.68029825 | 4.43E-05 | 0.00020639  | 1.76945944  | ---         | ---        | ---     | ---          | 7.483164   | 6.835468 | 7.215973    | 8.763889 | 8.769552 | 8.498071 | 8.0973   | 7.652026 | 7.537396 |          |
| 17334722  | 0.77948167 | 6.974351   | 6.78585508 | 4.44E-05 | 0.00020672  | 1.76693461  | Rpsud1      | NM_028009  | RefSeq  | Mus musculus | 6.594344   | 6.264237 | 6.482596    | 7.126857 | 7.272971 | 7.324844 | 7.196274 | 7.231178 | 7.320908 |          |
| 17232426  | 1.08819933 | 7.34621822 | 6.76706491 | 4.44E-05 | 0.00020695  | 1.7653491   | Echdc1c     | NM_025855  | RefSeq  | Mus musculus | 6.795335   | 6.719868 | 6.329673    | 7.700714 | 7.62957  | 7.77919  | 7.502364 | 7.618878 | 7.842372 |          |
| 17487489  | 1.757297   | 7.830762   | 7.66494909 | 4.45E-05 | 0.000207    | 1.76474169  | Pvr         | NM_007961  | RefSeq  | Mus musculus | 7.067961   | 6.031987 | 6.729033    | 8.210615 | 8.414826 | 8.529431 | 8.384073 | 8.549026 | 8.559906 |          |
| 17496376  | 1.84057533 | 6.35694767 | 6.7591167  | 4.45E-05 | 0.00020705  | 1.76412129  | Coro1a      | ENSMUST00T | ENSEMBL | cDNA:known   | 5.571095   | 4.709701 | 5.205589    | 7.110828 | 7.057327 | 6.839956 | 6.557886 | 7.284387 | 6.87576  |          |
| 1725347   | 0.87255233 | 7.11746678 | 6.7507889  | 4.45E-05 | 0.00020714  | 1.76323563  | Ddx52       | NM_030096  | RefSeq  | Mus musculus | 6.790079   | 6.490685 | 6.434768    | 7.431158 | 7.353153 | 7.548878 | 7.211184 | 7.371406 | 7.42589  |          |
| 17202505  | 1.34969367 | 8.49087889 | 6.74473733 | 4.45E-05 | 0.00020714  | 1.76287211  | ---         | ---        | ---     | ---          | 8.041381   | 7.512634 | 7.888208    | 9.296595 | 9.353267 | 8.841442 | 8.627797 | 8.348639 | 8.507947 |          |
| 17512423  | 0.68202667 | 6.91739356 | 7.6691615  | 4.48E-05 | 0.00020804  | 1.75693604  | Irf2bp2     | NM_001164  | RefSeq  | Mus musculus | 8.510396   | 8.259039 | 8.478813    | 9.123112 | 9.104115 | 9.157101 | 8.857262 | 8.809776 | 8.912928 |          |
| 17377197  | 1.769019   | 6.57793344 | 6.66891028 | 4.48E-05 | 0.00020804  | 1.75666852  | ---         | ---        | ---     | ---          | ENSMUST00T | ENSEMBL  | ncrna:miRNA | 4.253279 | 4.852377 | 4.442216 | 6.098836 | 6.319334 | 6.436759 | 5.907801 |
| 17256734  | 1.122276   | 8.88305078 | 7.6627682  | 4.51E-05 | 0.00020915  | 1.75012562  | Ifi35       | NM_027320  | RefSeq  | Mus musculus | 8.026148   | 7.929555 | 8.34996     | 9.230244 | 9.363099 | 9.080238 | 9.238082 | 9.166842 | 9.762794 |          |
| 17209209  | 1.70293467 | 6.56537033 | 7.65687    | 4.53E-05 | 0.00021029  | 1.74383875  | ---         | ---        | ---     | ---          | 5.843622   | 5.168463 | 5.724626    | 7.561463 | 7.240127 | 7.063745 | 6.583066 | 6.729771 | 7.19273  |          |
| 17406129  | 1.00213367 | 6.21712289 | 6.73879442 | 4.62E-05 | 0.000211378 | 1.72358761  | Tmem144     | NM_027495  | RefSeq  | Mus musculus | 5.449834   | 5.646356 | 5.424068    | 6.261331 | 6.453131 | 6.72227  | 6.507713 | 6.651206 | 7.68727  |          |
| 17216063  | 1.63894433 | 7.66514089 | 7.63501675 | 4.63E-05 | 0.00021411  | 1.72158162  | Bok         | NM_010778  | RefSeq  | Mus musculus | 6.399936   | 6.711734 | 6.844037    | 8.17843  | 7.94535  | 7.847632 | 8.040094 | 8.267355 | 8.040094 |          |
| 17291780  | 1.092563   | 5.99576111 | 7.63256742 | 4.64E-05 | 0.00021463  | 1.71789691  | Tubb2b      | NM_023716  | RefSeq  | Mus musculus | 5.085406   | 5.264372 | 5.267309    | 5.947845 | 5.515037 | 6.431894 | 6.521068 | 6.437995 | 6.490924 |          |
| 17475989  | 2.73871667 | 7.13054522 | 6.6361718  | 4.65E-05 | 0.00021474  | 1.71687994  | Lgals4      | NM_010706  | RefSeq  | Mus musculus | 5.549392   | 5.691195 | 5.472319    | 7.605571 | 6.850732 | 6.872753 | 7.292145 | 8.282757 | 7.012403 |          |
| 17521917  | 0.945218   | 6.85309767 | 6.60808737 | 4.65E-05 | 0.00021482  | 1.71609982  | Nckipd3     | ENSMUST00T | ENSEMBL | cDNA:known   | 6.160975   | 6.060449 | 6.491365    | 7.242279 | 7.136556 | 7.196608 | 7.299634 | 7.030086 | 7.068927 |          |
| 17535311  | 1.02276667 | 6.47825467 | 6.62809225 | 4.66E-05 | 0.00021534  | 1.71156147  | Ino80       | ENSMUST00T | ENSEMBL | cDNA:known   | 6.565123   | 6.061885 | 6.624502    | 7.680348 | 8.641999 | 7.684843 | 6.65475  | 6.876928 | 7.008569 |          |
| 17284360  | 1.4543232  | 9.27034811 | 6.2318914  | 4.68E-05 | 0.00021622  | 1.70787702  | Ighm        | AB067787   | GenBank | mus musculus | 7.616673   | 7.012734 | 5.341257    | 11.66932 | 10.78402 | 10.88002 | 10.07963 | 9.312699 | 10.73651 |          |
| 175385014 | 4.55373733 | 7.91225756 | 7.62049997 | 4.70E-05 | 0.00021664  | 1.70499011  | ---         | ---        | ---     | ---          | 9.012732   | 8.823908 | 8.354038    | 10.45575 | 10.23678 | 10.09336 | 10.46149 | 10.07832 | 9.89394  |          |
| 17536160  | 0.64019333 | 6.10208611 | 6.60806465 | 4.76E-05 | 0.00021929  | 1.69032482  | Coro1c      | ENSMUST00T | ENSEMBL | cDNA:known   | 10.31562   | 10.13408 | 10.04766    | 10.76504 | 10.8497  | 10.8032  | 10.85591 | 10.92749 | 10.88925 |          |
| 17539390  | 0.84123033 | 6.975888   | 6.60551502 | 4.77E-05 | 0.00021942  | 1.68894281  | Dkc1        | NM_001030  | RefSeq  | Mus musculus | 6.624496   | 6.361051 | 6.307936    | 7.258236 | 7.145408 | 7.32392  | 7.282956 | 7.130312 | 7.339227 |          |
| 17267601  | 1.60946607 | 7.40342189 | 5.9835635  | 4.80E-05 | 0.00022087  | 1.68126813  | Seep1       | NM_029023  | RefSeq  | Mus musculus | 6.375389   | 6.29057  | 5.869676    | 8.020802 | 7.953236 | 7.389817 | 8.069174 | 8.541086 | 8.120966 |          |
| 17474663  | 1.5671367  | 5.6231156  | 6.78876858 | 4.85E-05 | 0.00022284  | 1.66981583  | Zfp296      | NM_022409  | RefSeq  | Mus musculus | 4.515749   | 4.749496 | 4.618291    | 5.974123 | 6.526858 | 6.685396 | 5.633214 | 6.103938 | 6.398239 |          |
| 17287306  | 0.636033   | 8.9636134  | 5.87330733 | 4.87E-05 | 0.00022349  | 1.66554173  | Spin1       | NM_011462  | RefSeq  | Mus musculus | 9.407551   | 9.565084 | 9.365276    | 10.09661 | 10.13529 | 10.01411 | 10.06182 | 10.14439 | 9.982552 |          |
| 17534112  | 0.64060667 | 11.295752  | 7.58212122 | 4.88E-05 | 0.00022361  | 1.66387554  | Sic1a25     | NM_007451  | RefSeq  | Mus musculus | 10.91279   | 10.96899 | 10.74454    | 11.58174 | 11.4623  | 11.5671  | 11.40915 | 11.54948 | 11.52868 |          |
| 17398416  | 0.92765067 | 9.473711   | 7.57688003 | 4.90E-05 | 0.0002244   | 1.65821072  | Pdgfr       | NM_019971  | RefSeq  | Mus musculus | 7.338842   | 7.140443 | 7.470141    | 8.204218 | 8.177857 | 8.350303 | 8.331457 | 8.39995  | 8.073084 |          |
| 17341588  | 2.14523    | 5.97620022 | 7.6681896  | 4.90E-05 | 0.0002244   | 1.6581913   | Ephb2       | NM_010142  | RefSeq  | Mus musculus | 4.842684   | 4.106242 | 4.240458    | 6.490701 | 6.398113 | 6.73626  | 7.05463  | 7.620763 | 6.645118 |          |
| 17442179  | 0.69100833 | 8.20269922 | 7.57513616 | 4.91E-05 | 0.0002246   | 1.65636269  | 9030624J02R | ENSMUST00T | ENSEMBL | cDNA:known   | 7.818422   | 7.818938 | 7.550884    | 8.402037 | 8.438038 | 8.421194 | 8.401976 | 8.431708 | 8.541096 |          |
| 17488074  | 1.09523967 | 7.26739622 | 6.56998686 | 4.93E-05 | 0.0002255   | 1.65079955  | Elfn1       | NM_175522  | RefSeq  | Mus musculus | 6.425222   | 6.736755 | 6.722717    | 7.639671 | 7.752316 | 7.770319 | 7.473412 | 7.711981 | 7.71478  |          |
| 17351886  | 0.60088167 | 8.66178322 | 7.56414836 | 4.96E-05 | 0.00022655  | 1.64548428  | Smad2       | NM_001252  | RefSeq  | Mus musculus | 8.22469    | 8.26835  | 8.152652    | 8.626734 | 8.799416 | 8.75663  | 9.024741 | 8.927499 | 8.927499 |          |
| 17544453  | 0.64250267 | 8.96373078 | 7.56318797 | 4.97E-05 | 0.00022666  | 1.64348467  | Tmt2b       | NM_001676  | RefSeq  | Mus musculus | 8.277928   | 8.231323 | 8.247166    | 9.325675 | 8.733363 | 8.024857 | 8.346035 | 8.855433 | 8.855433 |          |
| 17549380  | 1.28929733 | 7.70404411 | 6.58280391 | 4.97E-05 | 0.00022666  | 1.64307719  | ---         | ---        | ---     | ---          | 4.679111   | 6.635627 | 7.612023    | 8.814126 | 8.232728 | 9.540599 | 6.106632 | 6.340147 | 7.56204  |          |
| 17219978  | 0.670631   | 9.9850772  | 7.56003968 | 4.98E-05 | 0.00022717  | 1.64009584  | Fam36a      | NM_025511  | RefSeq  | Mus musculus | 9.588392   | 9.72135  | 9.476515    | 10.32006 | 10.27343 | 10.1731  | 10.12335 | 10.03542 | 10.18184 |          |
| 17508163  | 1.30961333 | 8.08930633 | 7.5805628  | 4.99E-05 | 0.00022744  | 1.63844486  | ---         | ---        | ---     | ---          | 5.237179   | 8.402414 | 8.046204    | 9.514658 | 9.565999 | 9.545414 | 9.835209 | 9.558448 | 9.108622 |          |
| 17468273  | 0.68835667 | 1.17275311 | 5.4535068  | 5.06E-05 | 0.00023003  | 1.62427013  | Gm12070     | NM_002890  | RefSeq  | mus musculus | 11.13521   | 11.38182 | 11.27903    | 11.87952 | 11.95328 | 12.02833 | 11.85614 | 12.00847 | 12.02598 |          |
| 17263174  | 2.064525   | 7.44020478 | 5.3037138  | 5.13E-05 | 0.00023269  | 1.6081076   | 2210407C18  | ENSMUST00T | ENSEMBL | cDNA:known   | 6.5549     |          |             |          |          |          |          |          |          |          |

|          |            |            |            |          |            |            |             |                    |               |                    |          |          |          |          |          |          |          |          |          |
|----------|------------|------------|------------|----------|------------|------------|-------------|--------------------|---------------|--------------------|----------|----------|----------|----------|----------|----------|----------|----------|----------|
| 17546762 | 0.78182267 | 9.60523356 | 7.32456755 | 6.30E-05 | 0.00027338 | 1.38355944 | Midi1       | ENSMUSTOXX ENSEMBL | // cdna:known | 9.2101             | 8.823586 | 9.019343 | 9.840999 | 9.805097 | 9.752401 | 9.889206 | 10.02677 | 10.0796  |          |
| 17339549 | 0.949469   | 8.41627733 | 7.31251574 | 6.38E-05 | 0.00027628 | 1.37026456 | Ypel5       | NM_027166          | RefSeq        | Mus musculus       | 7.790585 | 7.771433 | 7.911436 | 8.600924 | 8.795987 | 8.92495  | 8.532602 | 8.507473 | 8.911006 |
| 17332956 | 0.94565333 | 11.4387833 | 7.30137095 | 6.45E-05 | 0.00027897 | 1.35795578 | Rnaset2b    | NM_026611          | RefSeq        | Mus musculus       | 10.97586 | 11.00418 | 10.50937 | 11.81582 | 11.75358 | 11.75697 | 11.78893 | 11.67337 | 11.67097 |
| 17264971 | 0.99967533 | 8.3556611  | 7.29806914 | 6.47E-05 | 0.00027973 | 1.35430645 | G630025P091 | NR_027913          | RefSeq        | // Re Mus musculus | 7.707125 | 7.457642 | 7.445521 | 8.548366 | 8.514392 | 8.546556 | 8.160851 | 8.193967 | 8.645675 |
| 17324451 | 0.83639367 | 9.10858167 | 7.2967503  | 6.48E-05 | 0.00028002 | 1.35284845 | Lpp         | NM_178665          | RefSeq        | Mus musculus       | 8.768183 | 8.614523 | 8.89634  | 9.329046 | 9.300649 | 9.364532 | 8.938225 | 9.369867 | 9.14486  |
| 17389093 | 0.59662167 | 6.57724444 | 7.29317344 | 6.50E-05 | 0.00028072 | 1.3488932  | 2700007P21f | NM_001025          | RefSeq        | Mus musculus       | 6.315864 | 6.168378 | 6.132441 | 6.769399 | 6.838816 | 6.798333 | 6.616671 | 6.774838 | 6.78046  |
| 17458641 | 0.736719   | 10.173707  | 7.2896776  | 6.53E-05 | 0.00028141 | 1.34502617 | Tax1bp1     | NM_025816          | RefSeq        | Mus musculus       | 9.824909 | 9.556871 | 9.585683 | 10.3528  | 10.40466 | 10.38416 | 10.3884  | 10.40279 | 10.62709 |
| 17319207 | 0.98358167 | 6.87273133 | 7.28810273 | 6.54E-05 | 0.00028169 | 1.34328362 | Cnk1e       | NM_013767          | RefSeq        | Mus musculus       | 6.242459 | 6.580128 | 6.406559 | 7.07476  | 7.235872 | 7.129259 | 7.309161 | 7.287993 | 7.328391 |
| 17358815 | 1.75784833 | 5.6878289  | 7.2688395  | 6.54E-05 | 0.00028196 | 1.34188569 | Ifn2        | NM_008332          | RefSeq        | Mus musculus       | 4.360912 | 4.744034 | 4.426552 | 5.870629 | 6.41959  | 6.514824 | 6.033157 | 6.043738 | 6.77661  |
| 17407390 | 2.511803   | 8.91189278 | 7.26717085 | 6.62E-05 | 0.00028458 | 1.33007229 | Spr2a1      | NM_011468          | RefSeq        | // Re Mus musculus | 7.605662 | 6.450476 | 7.362544 | 9.777037 | 9.901517 | 8.755537 | 9.195456 | 9.624168 | 9.814638 |
| 17407393 | 2.511803   | 8.91189278 | 7.26717085 | 6.62E-05 | 0.00028458 | 1.33007229 | Spr2a1      | NM_011468          | RefSeq        | // Re Mus musculus | 7.605662 | 6.450476 | 7.362544 | 9.777037 | 9.901517 | 8.755537 | 9.195456 | 9.624168 | 9.814638 |
| 17407764 | 0.72023    | 8.27957611 | 7.27470105 | 6.63E-05 | 0.00028475 | 1.32844378 | Prune       | NM_173747          | RefSeq        | Mus musculus       | 6.689729 | 7.25207  | 7.711669 | 8.384817 | 8.15593  | 8.585711 | 8.52557  | 8.69107  | 8.489239 |
| 17545347 | 0.711035   | 7.25745044 | 7.2741073  | 6.63E-05 | 0.00028475 | 1.32778585 | Gtf1d1r1    | NM_001081          | RefSeq        | Mus musculus       | 7.698508 | 6.817433 | 6.661877 | 7.446434 | 7.421717 | 7.513772 | 7.744291 | 7.408565 | 7.534267 |
| 17545795 | 0.94971767 | 7.21130467 | 7.27404533 | 6.63E-05 | 0.00028475 | 1.32771474 | Pcyo1k1     | NM_172832          | RefSeq        | Mus musculus       | 6.789787 | 6.629148 | 6.48958  | 7.562986 | 7.527389 | 7.656284 | 7.618548 | 7.491019 | 7.14761  |
| 17468298 | 8.00084233 | 9.26955522 | 7.26532979 | 6.69E-05 | 0.00028675 | 1.31805486 | Exoc6b      | NM_177077          | RefSeq        | Mus musculus       | 8.896532 | 7.794988 | 8.514988 | 9.501054 | 9.594378 | 9.651972 | 9.526302 | 9.43236  | 9.43236  |
| 17398360 | 8.00870933 | 10.627188  | 7.25902844 | 6.73E-05 | 0.00028841 | 1.31106365 | ---         | ENSMUSTOXX ENSEMBL | cdna:known    | 9.993452           | 10.10298 | 10.19434 | 10.81558 | 10.88281 | 10.11851 | 10.73217 | 10.81658 | 11.08827 | 11.08827 |
| 17481102 | 1.20250367 | 7.791334   | 7.25856738 | 6.74E-05 | 0.00028843 | 1.31055195 | Rrm1        | NM_009103          | RefSeq        | Mus musculus       | 7.02243  | 7.225579 | 6.556427 | 8.079465 | 8.093123 | 8.239559 | 8.125025 | 8.353329 | 8.427059 |
| 17477391 | 2.565998   | 6.0336711  | 7.25026989 | 6.79E-05 | 0.00029053 | 1.30138779 | Klk1        | NM_010639          | RefSeq        | Mus musculus       | 3.958225 | 4.16608  | 4.042005 | 5.704547 | 6.940785 | 7.218972 | 7.586598 | 7.63687  | 7.046222 |
| 17490328 | 0.78957667 | 7.08239056 | 7.24766555 | 6.81E-05 | 0.00029112 | 1.29844656 | Myh14       | NM_028021          | RefSeq        | Mus musculus       | 6.63711  | 6.663481 | 6.49938  | 7.323956 | 7.455425 | 7.289777 | 7.054674 | 7.454336 | 7.454336 |
| 17482733 | 0.84933533 | 10.4700804 | 7.24564612 | 6.82E-05 | 0.00029154 | 1.2962014  | ---         | ---                | ---           | ---                | 10.07913 | 9.909575 | 9.712169 | 10.75302 | 10.58088 | 10.91498 | 10.80811 | 10.71493 | 10.75793 |
| 17479575 | 2.15912433 | 6.30958389 | 7.23674893 | 6.89E-05 | 0.00029401 | 1.28630907 | Prc1        | NM_145150          | RefSeq        | Mus musculus       | 5.612084 | 5.594807 | 4.459475 | 6.780867 | 7.054626 | 7.306046 | 6.716628 | 7.001832 | 7.25751  |
| 17462647 | 0.60934333 | 10.8062778 | 7.2360511  | 6.93E-05 | 0.00029576 | 1.27947284 | M6pr        | ENSMUSTOXX ENSEMBL | cdna:known    | 10.46414           | 10.47662 | 10.2295  | 10.95341 | 11.00095 | 11.04393 | 11.0136  | 11.02039 | 11.05396 | 11.05396 |
| 17540532 | 6.64403    | 11.9710233 | 7.2295242  | 6.94E-05 | 0.000296   | 1.27826967 | Gm12070     | NR_002890          | RefSeq        | // Re Mus musculus | 11.43982 | 11.65915 | 11.48942 | 12.17715 | 12.12783 | 12.2155  | 12.11399 | 12.18695 | 12.3294  |
| 17493756 | 0.87354467 | 8.897784   | 7.22460306 | 6.97E-05 | 0.00029721 | 1.27279022 | Ppme1       | NM_028292          | RefSeq        | Mus musculus       | 8.403172 | 8.492379 | 8.077419 | 9.15044  | 9.128254 | 9.31491  | 9.211066 | 9.500755 | 9.251211 |
| 17385329 | 0.729254   | 8.89433022 | 7.22355821 | 6.98E-05 | 0.00029744 | 1.27162648 | Pp4f0a      | ENSMUSTOXX ENSEMBL | cdna:known    | 8.509497           | 8.577673 | 8.235143 | 9.151035 | 9.116619 | 9.242421 | 9.116291 | 8.996757 | 9.103536 | 9.103536 |
| 17532472 | 0.699991   | 8.31500289 | 7.22057425 | 7.00E-05 | 0.00029825 | 1.2683023  | Cdcp1       | ENSMUSTOXX ENSEMBL | cdna:known    | 7.739847           | 7.994066 | 7.811521 | 8.482307 | 8.469677 | 8.690723 | 8.616044 | 8.499662 | 8.533819 | 8.533819 |
| 17253024 | 0.74253333 | 11.1249133 | 7.21481467 | 7.04E-05 | 0.00029973 | 1.26188345 | Ptpn9a      | ENSMUSTOXX ENSEMBL | cdna:known    | 10.75574           | 10.58421 | 10.55863 | 11.50136 | 11.46347 | 11.11335 | 11.43947 | 11.30682 | 11.25317 | 11.25317 |
| 17269391 | 0.23207667 | 7.14192289 | 7.21241313 | 7.06E-05 | 0.00030019 | 1.25920551 | Krt14       | NM_016958          | RefSeq        | Mus musculus       | 5.743526 | 5.872644 | 6.266448 | 8.01452  | 8.098644 | 7.875334 | 6.818772 | 7.521905 | 8.068581 |
| 17222001 | 0.850383   | 7.06230733 | 7.21121376 | 7.06E-05 | 0.00030022 | 1.25843608 | Prim2       | ENSMUSTOXX ENSEMBL | cdna:known    | 6.445395           | 6.617134 | 6.323372 | 7.263685 | 7.322516 | 7.350849 | 7.282703 | 7.307838 | 7.666274 | 7.666274 |
| 17225179 | 0.89811267 | 9.31336978 | 7.21114427 | 7.07E-05 | 0.0003003  | 1.25779049 | Pde6d       | ENSMUSTOXX ENSEMBL | cdna:known    | 8.490779           | 8.790395 | 8.450822 | 9.565183 | 9.614686 | 9.694655 | 9.576213 | 9.506194 | 9.679591 | 9.679591 |
| 17526297 | 1.91846657 | 6.63841878 | 7.2055556  | 7.11E-05 | 0.00030202 | 1.25122109 | Upk2        | NM_009476          | RefSeq        | Mus musculus       | 4.452989 | 4.455979 | 5.022871 | 6.532504 | 6.094086 | 7.057946 | 5.377807 | 5.829563 | 5.919324 |
| 17464934 | 0.607415   | 7.65707744 | 7.20010812 | 7.14E-05 | 0.00030303 | 1.24656251 | 261000105R  | NR_024619          | RefSeq        | Mus musculus       | 7.255892 | 7.134040 | 7.26495  | 7.860796 | 7.768287 | 7.840048 | 7.85558  | 7.860867 | 8.106513 |
| 17297480 | 3.890039   | 5.51808589 | 7.20081862 | 7.14E-05 | 0.00030303 | 1.24626867 | Igk-v28     | DQ078272           | // GenBank    | // Mus musculus    | 3.888331 | 2.758787 | 3.169819 | 8.310189 | 6.721171 | 6.455694 | 6.81155  | 5.455022 | 6.13173  |
| 17464934 | 0.89035567 | 6.69572433 | 7.20015728 | 7.15E-05 | 0.00030313 | 1.2455303  | Mgst3       | ENSMUSTOXX ENSEMBL | cdna:known    | 8.881694           | 6.135435 | 6.187111 | 6.904745 | 6.828526 | 7.142036 | 6.981482 | 6.976192 | 7.224988 | 7.224988 |
| 17318194 | 0.94048627 | 6.25269869 | 7.19231492 | 7.21E-05 | 0.00030354 | 1.23656961 | Naprt1      | NM_172607          | RefSeq        | Mus musculus       | 5.588464 | 5.391904 | 5.840941 | 6.688611 | 6.446272 | 6.507874 | 6.662307 | 6.701536 | 6.44882  |
| 17500595 | 0.93810633 | 6.484583   | 7.19075313 | 7.22E-05 | 0.00030561 | 1.23527356 | D8Ertd82e   | NM_172911          | RefSeq        | Mus musculus       | 7.961263 | 7.901976 | 8.21415  | 9.109937 | 8.998627 | 9.087534 | 9.037115 | 8.760971 | 8.760971 |
| 17331564 | 0.61952333 | 8.39303489 | 7.18179146 | 7.28E-05 | 0.00030814 | 1.2250055  | Nrip1       | ENSMUSTOXX ENSEMBL | cdna:known    | 7.999288           | 7.864532 | 7.98877  | 8.67182  | 8.605822 | 8.432708 | 8.720389 | 8.64581  | 8.612004 | 8.612004 |
| 17482943 | 1.57818433 | 6.49057011 | 7.18172045 | 7.28E-05 | 0.00030814 | 1.22492607 | Il4ra       | NM_001008          | RefSeq        | Mus musculus       | 5.471639 | 5.109112 | 5.977979 | 6.903571 | 7.264475 | 7.125237 | 6.64323  | 7.118237 | 7.603271 |
| 17294785 | 0.83466333 | 8.01296578 | 7.16954441 | 7.38E-05 | 0.00031125 | 1.21129737 | Atg10       | NM_025770          | RefSeq        | Mus musculus       | 7.319032 | 7.639622 | 7.222115 | 8.280062 | 8.312031 | 8.092585 | 8.392363 | 8.401022 | 8.48468  |
| 17539366 | 0.73902067 | 10.5545242 | 7.1682082  | 7.39E-05 | 0.00031137 | 1.2098007  | Ptp4a1      | NM_011200          | RefSeq        | // Re Mus musculus | 10.27088 | 10.12796 | 9.863878 | 10.83102 | 10.80455 | 10.84421 | 10.73393 | 10.76238 | 10.78791 |
| 17364543 | 0.73902067 | 10.5545242 | 7.1682082  | 7.39E-05 | 0.00031137 | 1.2098007  | Ptp4a1      | NM_011200          | RefSeq        | // Re Mus musculus | 10.27088 | 10.12796 | 9.863878 | 10.83102 | 10.80455 | 10.84421 | 10.73393 | 10.76238 | 10.78791 |
| 17302031 | 0.84099267 | 7.37320744 | 7.16796759 | 7.39E-05 | 0.00031137 | 1.2098007  | Akr1e1      | NM_018859          | RefSeq        | Mus musculus       | 7.016438 | 6.691486 | 6.784018 | 7.609642 | 7.646803 | 7.758835 | 7.478855 | 7.811247 | 7.561183 |
| 17476175 | 1.077094   | 7.41807644 | 7.16386445 | 7.40E-05 | 0.00032127 | 1.20451396 | Zfp84       | NM_021769          | RefSeq        | Mus musculus       | 6.916536 | 6.786484 | 6.334908 | 7.673634 | 7.718019 | 7.877557 | 7.752339 | 7.742856 | 7.742856 |
| 17297833 | 0.58547233 | 7.1271867  | 7.16349341 | 7.42E-05 | 0.00032127 | 1.20451396 | Anxa11      | NM_013469          | RefSeq        | // Re Mus musculus | 10.98901 | 10.89609 | 10.81477 | 11.55264 | 11.46345 | 11.4401  | 11.51214 | 11.39608 | 11.39608 |
| 17297833 | 0.58547233 | 7.1271867  | 7.16349341 | 7.42E-05 | 0.00032127 | 1.20451396 | Anxa11      | NM_013469          | RefSeq        | // Re Mus musculus | 10.98901 | 10.89609 | 10.81477 | 11.55264 | 11.46345 | 11.4401  | 11.51214 | 11.39608 | 11.39608 |
| 17236882 | 1.09662367 | 8.52034744 | 7.16310992 | 7.42E-05 | 0.00032127 | 1.2048836  | Dusp6       | NM_026268          | RefSeq        | Mus musculus       | 7.990337 | 7.835152 | 7.878586 | 8.8381   | 8.91594  | 9.247606 | 8.355317 | 8.766068 | 8.850121 |
| 17336407 | 1.84103467 | 7.21023738 | 7.16274686 | 7.43E-05 | 0.00032129 | 1.20368145 | H2-M4a      | ENSMUSTOXX ENSEMBL | cdna:known    | 5.002368           | 5.426292 | 6.426316 | 8.083281 | 7.84809  | 9.746709 | 7.614011 | 7.662321 | 7.398916 | 7.398916 |
| 17537514 | 1.602415   | 7.77347789 | 7.16201393 | 7.43E-05 | 0.00032123 | 1.20285998 | Cybas3c     | ENSMUSTOXX ENSEMBL | cdna:known    | 7.306201           | 7.447722 | 7.409929 | 7.905979 | 8.108492 | 7.956626 |          |          |          |          |



|          |            |            |            |            |            |            |             |            |         |               |          |          |          |          |          |          |          |          |          |
|----------|------------|------------|------------|------------|------------|------------|-------------|------------|---------|---------------|----------|----------|----------|----------|----------|----------|----------|----------|----------|
| 17295233 | 0.84613667 | 8.30678833 | 6.54473363 | 0.00014295 | 0.00052913 | 0.48851324 | Hmgcr       | NM_008255  | RefSeq  | Mus musculus  | 7.701959 | 7.779845 | 7.47028  | 8.293724 | 8.514388 | 8.682382 | 8.643529 | 8.915823 | 8.759165 |
| 17405380 | 0.65108167 | 7.31230978 | 6.53517474 | 0.00014445 | 0.00053339 | 0.47708772 | Comm2d      | ENSMUST00T | ENSEMBL | cdna-known i  | 6.779145 | 6.920746 | 7.027388 | 7.490737 | 7.718812 | 7.570975 | 7.308626 | 7.51458  | 7.579779 |
| 17446505 | 0.70628967 | 7.41486344 | 6.53398568 | 0.00014464 | 0.00053368 | 0.47566567 | Rbjp        | NM_009035  | RefSeq  | Mus musculus  | 7.117453 | 6.988266 | 6.866251 | 7.6753   | 7.608545 | 7.806994 | 7.738453 | 7.453561 | 7.478948 |
| 17248078 | 1.71905533 | 5.48384422 | 6.53341141 | 0.00014473 | 0.00053378 | 0.47497881 | ---         | ---        | ---     | ---           | 4.31675  | 4.484686 | 5.140121 | 6.580925 | 6.674816 | 5.842832 | 5.307727 | 5.570629 | 5.436112 |
| 17209567 | 1.03592867 | 8.25362367 | 6.53165689 | 0.00014501 | 0.00053455 | 0.47288005 | ---         | ---        | ---     | ---           | 7.820296 | 7.466366 | 7.356602 | 6.483216 | 6.584484 | 6.862768 | 8.925055 | 8.523847 | 8.440561 |
| 17413832 | 0.66309267 | 9.03779767 | 6.53036073 | 0.00014522 | 0.0005351  | 0.47132934 | Nans        | ENSMUST00T | ENSEMBL | cdna-known i  | 6.659816 | 6.829831 | 8.614194 | 9.361332 | 9.324439 | 9.407348 | 8.965176 | 8.939336 | 9.238707 |
| 17338416 | 1.60974867 | 5.52591011 | 6.52154881 | 0.00014663 | 0.00053958 | 0.46078127 | Trem2       | NM_031254  | RefSeq  | Mus musculus  | 4.835583 | 3.835509 | 4.423155 | 5.904838 | 5.989275 | 6.02938  | 6.06575  | 6.684834 | 6.207867 |
| 17302475 | 2.60395767 | 5.31227167 | 6.52107772 | 0.00014667 | 0.00053971 | 0.46021709 | Irg1        | ENSMUST00T | ENSEMBL | cdna-known i  | 3.857778 | 3.764193 | 3.570619 | 6.03311  | 6.132654 | 6.886878 | 5.489398 | 5.264957 | 6.890337 |
| 17502191 | 0.883515   | 9.40325556 | 6.51811864 | 0.00014718 | 0.00054118 | 0.45667265 | Mrlp3a      | NM_053162  | RefSeq  | Mus musculus  | 8.992595 | 9.087969 | 8.596156 | 9.701934 | 9.817141 | 9.80819  | 9.477692 | 9.44016  | 9.707463 |
| 17449516 | 0.70481233 | 8.78952894 | 6.51140663 | 0.00014827 | 0.00054543 | 0.44862842 | Cov18       | NM_001163  | RefSeq  | Mus musculus  | 8.153083 | 8.56351  | 8.424675 | 9.035628 | 9.158612 | 8.97456  | 8.972318 | 8.926326 | 9.08466  |
| 17464516 | 0.859463   | 7.17356422 | 6.5105777  | 0.00014833 | 0.00054543 | 0.44821059 | Sx38l       | NM_172734  | RefSeq  | Mus musculus  | 6.611956 | 6.409321 | 6.441804 | 7.581728 | 7.163653 | 7.462139 | 7.826188 | 7.420493 | 7.585659 |
| 17575971 | 0.8649783  | 8.18355022 | 6.50924155 | 0.00014862 | 0.00054543 | 0.44602592 | Gna14       | NM_008137  | RefSeq  | Mus musculus  | 7.661996 | 7.387359 | 7.650469 | 8.427655 | 8.357284 | 8.50982  | 8.564583 | 8.788239 | 8.305447 |
| 17220944 | 1.23888033 | 6.27991856 | 6.50786015 | 0.00014885 | 0.00054587 | 0.44437636 | Lamb3       | ENSMUST00T | ENSEMBL | cdna-known i  | 5.412932 | 5.714505 | 5.516282 | 6.65935  | 6.854865 | 6.846145 | 6.030231 | 6.775812 | 6.709145 |
| 17465229 | 0.79251567 | 7.44233434 | 6.5013013  | 0.00014949 | 0.00054895 | 0.43560773 | Zfp800      | ENSMUST00T | ENSEMBL | cdna-novel cl | 7.210742 | 7.330854 | 7.143709 | 8.180434 | 7.845398 | 8.043323 | 8.14201  | 8.014812 | 7.70519  |
| 17284609 | 4.07747433 | 5.40794089 | 6.49921121 | 0.00015027 | 0.00055006 | 0.43399912 | ---         | ---        | ---     | ---           | 3.063588 | 3.185363 | 6.394405 | 8.153605 | 7.196087 | 8.623087 | 5.213204 | 4.233514 | 7.015615 |
| 17223985 | 1.02239233 | 8.846609   | 6.4968126  | 0.00015064 | 0.00055098 | 0.43132055 | Ikzf2       | NM_011770  | RefSeq  | Mus musculus  | 8.492817 | 8.25683  | 7.831038 | 9.264904 | 9.103724 | 9.281745 | 9.253198 | 9.074911 | 9.060314 |
| 17312939 | 0.62592267 | 10.5101413 | 6.49636214 | 0.00015074 | 0.00055121 | 0.43057868 | Polr2f      | NM_027231  | RefSeq  | Mus musculus  | 10.26129 | 9.961942 | 10.02991 | 10.79095 | 10.65845 | 10.68151 | 10.65225 | 10.7491  | 10.80587 |
| 17271622 | 0.77025767 | 7.07398    | 6.4953724  | 0.00015086 | 0.0005515  | 0.42970823 | Cdc42ep4    | ENSMUST00T | ENSEMBL | cdna-known i  | 6.385117 | 6.626291 | 6.830045 | 7.372591 | 7.417513 | 7.408522 | 7.057723 | 7.235733 | 7.285885 |
| 17513878 | 0.930127   | 6.98085244 | 6.49313743 | 0.00015128 | 0.00055273 | 0.42670602 | Dennad4     | NM_001162  | RefSeq  | Mus musculus  | 6.395473 | 6.678969 | 6.415391 | 7.438567 | 7.207408 | 7.132722 | 7.385775 | 7.549941 | 7.044663 |
| 17438315 | 1.26861533 | 6.59857111 | 6.49209636 | 0.00015145 | 0.00055322 | 0.42545549 | Mmp23       | NM_011985  | RefSeq  | Mus musculus  | 5.726503 | 5.691051 | 5.780229 | 7.120561 | 6.870786 | 7.012282 | 7.11022  | 7.483539 | 6.591969 |
| 17276007 | 0.87108267 | 8.94136356 | 6.48654558 | 0.00015154 | 0.00055634 | 0.41867792 | Tmx1        | ENSMUST00T | ENSEMBL | cdna-known i  | 6.868721 | 6.566611 | 8.173346 | 9.279282 | 9.322502 | 9.438142 | 9.006542 | 8.889719 | 9.109407 |
| 17486136 | 0.885902   | 6.34851922 | 6.48627578 | 0.00015243 | 0.00055634 | 0.41846348 | Zfp954      | NM_127738  | RefSeq  | Mus musculus  | 6.107559 | 5.691296 | 5.610641 | 6.55001  | 6.791026 | 6.706776 | 6.473239 | 6.612713 | 6.612713 |
| 17342642 | 1.14188633 | 8.18071944 | 6.48511817 | 0.00015262 | 0.00055676 | 0.41706981 | Dusp1       | ENSMUST00T | ENSEMBL | cdna-known i  | 7.508573 | 7.372447 | 7.337147 | 8.298843 | 8.624477 | 8.740506 | 8.602794 | 8.502293 | 8.939949 |
| 17489989 | 1.05955667 | 6.91321156 | 6.47581591 | 0.00015419 | 0.0005619  | 0.40588176 | Abr87944    | NM_001199  | RefSeq  | Mus musculus  | 5.846997 | 5.26292  | 5.2207   | 6.388434 | 6.676559 | 6.444294 | 6.610033 | 6.635901 | 6.63086  |
| 17545159 | 0.85835433 | 7.57468344 | 6.47070021 | 0.00015507 | 0.00056434 | 0.39972435 | Amot        | ENSMUST00T | ENSEMBL | cdna-known i  | 7.198009 | 6.944474 | 6.862219 | 7.932669 | 7.913608 | 7.733488 | 8.102694 | 7.6955   | 7.78949  |
| 17321597 | 1.57533033 | 6.12372256 | 6.46954436 | 0.00015526 | 0.00056462 | 0.39832768 | Racgfp1     | NM_012025  | RefSeq  | Mus musculus  | 5.451508 | 5.260278 | 5.511426 | 6.332737 | 6.691383 | 6.932747 | 6.529633 | 6.705135 | 6.705135 |
| 17280079 | 1.33516033 | 5.42806856 | 6.46789428 | 0.00015555 | 0.0005655  | 0.39634566 | ---         | ---        | ---     | ---           | 4.904642 | 5.60803  | 5.015929 | 5.450975 | 5.396117 | 5.588277 | 4.567633 | 4.309997 | 4.917137 |
| 17248929 | 0.757402   | 7.22212944 | 6.46534278 | 0.000156   | 0.00056671 | 0.393152   | Zfp62       | NM_010241  | RefSeq  | Mus musculus  | 6.757619 | 6.843413 | 6.4875   | 6.375653 | 7.303322 | 7.472853 | 7.460373 | 7.451788 | 7.587374 |
| 17226991 | 0.6414     | 6.18278289 | 6.46367457 | 0.00015627 | 0.00056754 | 0.39126272 | Snrpe       | NM_009227  | RefSeq  | Mus musculus  | 5.787366 | 5.959864 | 5.680813 | 6.55913  | 6.297668 | 6.496035 | 6.255955 | 6.299446 | 6.308669 |
| 17396315 | 0.83436267 | 8.589568   | 6.46151522 | 0.00015663 | 0.00056856 | 0.38878127 | Tbl1r1      | NM_003732  | RefSeq  | Mus musculus  | 8.154916 | 8.036728 | 7.908086 | 6.08906  | 6.834428 | 7.911684 | 8.950632 | 8.89887  | 8.96962  |
| 17492078 | 0.95347367 | 6.65113278 | 6.46157533 | 0.00015664 | 0.00056856 | 0.3887332  | Mctp2       | NM_010241  | RefSeq  | Mus musculus  | 6.348835 | 5.744433 | 5.8735   | 6.971974 | 6.968239 | 8.686688 | 7.133176 | 7.007303 | 6.925867 |
| 17485589 | 1.602937   | 5.42877133 | 6.45701479 | 0.00015742 | 0.00057096 | 0.3832835  | Ulr1b3      | ENSMUST00T | ENSEMBL | cdna-known i  | 4.390454 | 4.182705 | 4.599082 | 6.028353 | 5.991004 | 5.961695 | 5.377745 | 6.50411  | 5.823794 |
| 17402698 | 2.30953133 | 6.52498467 | 6.45448984 | 0.00015787 | 0.00057243 | 0.38019132 | Dkl2        | NM_020265  | RefSeq  | Mus musculus  | 5.989833 | 5.187307 | 5.103312 | 8.076256 | 7.606645 | 7.526145 | 7.935996 | 8.165033 | 6.895525 |
| 17448712 | 0.766009   | 7.704881   | 6.44668479 | 0.00015921 | 0.00057698 | 0.37099189 | Tec         | NM_001113  | RefSeq  | Mus musculus  | 7.34201  | 7.24733  | 6.883659 | 7.993867 | 7.871812 | 7.905347 | 8.065763 | 7.963305 | 8.070776 |
| 17438319 | 0.92751267 | 7.51868533 | 6.44451974 | 0.00015962 | 0.00057809 | 0.36816118 | ---         | ---        | ---     | ---           | 6.948972 | 6.888296 | 7.152364 | 7.909878 | 8.083466 | 7.778853 | 7.496604 | 7.479214 | 7.930521 |
| 17502776 | 1.30896    | 9.73071011 | 6.44334057 | 0.00015983 | 0.00057818 | 0.36673754 | ---         | ---        | ---     | ---           | 9.446028 | 8.87577  | 9.033132 | 10.49746 | 10.6446  | 10.13975 | 9.968702 | 9.917013 | 9.960277 |
| 17244126 | 0.77570133 | 6.66321256 | 6.43900888 | 0.00016006 | 0.00058065 | 0.36150627 | Actr6       | NM_025914  | RefSeq  | Mus musculus  | 6.294339 | 6.043962 | 5.990933 | 6.66426  | 7.017922 | 6.974156 | 6.981265 | 6.929383 | 7.072695 |
| 17378321 | 1.31166133 | 6.67036667 | 6.42301748 | 0.00016178 | 0.00058054 | 0.35352249 | ---         | ---        | ---     | ---           | 5.799778 | 5.862368 | 5.926157 | 6.996196 | 7.368947 | 7.158424 | 7.068715 | 6.485836 | 7.366599 |
| 17397523 | 0.68811067 | 8.71721567 | 6.42311121 | 0.00016183 | 0.00058404 | 0.35317125 | 28110046L04 | ENSMUST00T | ENSEMBL | cdna-known i  | 8.342003 | 8.226219 | 8.152009 | 9.103354 | 8.919243 | 8.761966 | 9.073409 | 9.008215 | 8.886523 |
| 17427051 | 1.09646467 | 6.33121789 | 6.42714148 | 0.00016272 | 0.00058696 | 0.34716219 | Ptp4d2      | ENSMUST00T | ENSEMBL | cdna-known i  | 5.730446 | 5.326451 | 5.51697  | 6.481595 | 4.656724 | 6.925032 | 6.728953 | 7.107278 | 7.04722  |
| 17284560 | 3.62161433 | 4.1388672  | 6.42584588 | 0.00016295 | 0.00058749 | 0.34560601 | ---         | ---        | ---     | ---           | 7.212103 | 7.205493 | 2.387203 | 7.044271 | 6.08126  | 5.544111 | 4.931652 | 2.766049 | 3.077663 |
| 17284577 | 2.711373   | 5.97579511 | 6.42378442 | 0.00016333 | 0.00058854 | 0.3310129  | Ighv15-3    | AB069917 / | GenBank | Mus musculus  | 4.376632 | 4.482182 | 4.361012 | 6.374977 | 6.724901 | 6.440917 | 6.354233 | 6.080826 | 5.93182  |
| 17249036 | 1.6077567  | 6.94695022 | 6.42263661 | 0.00016254 | 0.00058912 | 0.34172823 | Gfp12       | NM_015259  | RefSeq  | Mus musculus  | 6.363454 | 5.93516  | 6.069762 | 7.440369 | 7.23539  | 7.174954 | 7.693311 | 7.645114 | 7.03928  |
| 17494643 | 1.01396767 | 5.70116622 | 6.41922333 | 0.00016388 | 0.00059021 | 0.33984328 | Gvin1       | NM_029090  | RefSeq  | Mus musculus  | 5.058203 | 4.804279 | 5.058203 | 5.968147 | 5.968147 | 8.366384 | 6.042587 | 6.454578 | 6.433742 |
| 17467449 | 3.05795667 | 6.003549   | 6.41932538 | 0.00016414 | 0.00059084 | 0.33770517 | ---         | ---        | ---     | ---           | 5.585909 | 4.66572  | 5.452392 | 7.098315 | 8.490692 | 7.378884 | 6.729393 | 5.657679 | 6.407327 |
| 17220475 | 1.19477933 | 7.64093044 | 6.41599433 | 0.00016475 | 0.00059288 | 0.33632743 | Dusp10      | ENSMUST00T | ENSEMBL | cdna-known i  | 6.999031 | 6.954342 | 6.543866 | 8.154087 | 7.77153  | 8.15596  | 8.027358 | 7.792826 | 8.369374 |
| 17449534 | 0.83665333 | 10.797892  | 6.41473226 | 0.00016498 | 0.00059355 | 0.33214416 | ---         | ---        | ---     | ---           | 10.39209 | 10.39447 | 10.35078 | 11.52796 | 11.07414 | 11.0452  | 10.9149  | 10.71951 | 10.76198 |
| 17427485 | 0.59137967 | 8.5419172  | 6.40903398 | 0.00016603 | 0.00059686 | 0.32523774 | Sbno2       | NM_183426  | RefSeq  | Mus musculus  | 8.200282 | 8.129049 | 8.262497 | 8.928427 | 8.76797  | 8.66957  | 8.68372  | 8.529331 | 8.706409 |
| 17218254 | 0.64868    | 10.7482089 | 6.40082623 | 0.00016755 | 0.00060124 | 0.31529144 | Arcp5       | NM_026369  | RefSeq  | Mus musculus  |          |          |          |          |          |          |          |          |          |





|          |            |            |            |            |            |            |                       |            |                  |              |          |          |          |            |          |          |          |          |          |
|----------|------------|------------|------------|------------|------------|------------|-----------------------|------------|------------------|--------------|----------|----------|----------|------------|----------|----------|----------|----------|----------|
| 17203479 | 0.84692333 | 6.37327933 | 5.32728707 | 0.00059499 | 0.00169481 | -1.0627922 | ---                   | ---        | ---              | 5.911925     | 5.781409 | 5.691407 | 6.751821 | 6.528865   | 6.644825 | 6.304893 | 6.940377 | 6.803992 |          |
| 17513525 | 0.58935133 | 7.08928389 | 5.32686021 | 0.00059531 | 0.00169537 | -1.0633715 | Gins2                 | ENSNMUSTOX | ENSEMBL          | cdna:known i | 6.859045 | 6.699613 | 6.503865 | 7.285996   | 7.184438 | 7.360143 | 7.167933 | 7.337525 | 7.400497 |
| 17531533 | 0.951179   | 6.50119378 | 5.31958657 | 0.00060076 | 0.00170773 | -1.0732458 | Slc39a6               | NM_139143  | RefSeq           | Mus musculus | 5.700241 | 5.857955 | 5.812492 | 6.507542   | 6.86123  | 6.855451 | 6.777317 | 6.74845  | 7.390068 |
| 17574525 | 1.033079   | 6.47842822 | 5.31435952 | 0.00060472 | 0.00171654 | -1.0803785 | Rab31l1               | NM_144538  | RefSeq           | Mus musculus | 5.997185 | 5.687075 | 5.738601 | 6.705371   | 6.940635 | 6.876092 | 6.885737 | 7.144978 | 6.33018  |
| 17279094 | 0.94589393 | 7.64228812 | 5.31365131 | 0.00060524 | 0.00171754 | -1.0813087 | ---                   | ---        | ---              | ---          | 7.046649 | 7.496469 | 7.245476 | 8.372322   | 8.376556 | 7.877234 | 7.265915 | 7.419534 |          |
| 17279030 | 0.91830333 | 9.05422867 | 5.31354571 | 0.00060532 | 0.00171754 | -1.0814522 | ---                   | ---        | ---              | ---          | 8.887539 | 8.457757 | 8.492979 | 9.488679   | 9.635128 | 9.469378 | 9.202809 | 9.200992 |          |
| 17262241 | 2.703226   | 5.452637   | 5.30991973 | 0.00060808 | 0.00172396 | -1.0683805 | 993011121R BC061041 / | GenBank    | /(i Mus musculus | 5.06594      | 2.763372 | 3.142699 | 6.282236 | 6.374725   | 6.424728 | 6.012777 | 5.567124 | 6.440042 |          |
| 17466861 | 0.70809567 | 6.01526122 | 5.30608397 | 0.00061102 | 0.00173121 | -1.091596  | Mira                  | NR_045199  | RefSeq           | Mus musculus | 5.730897 | 5.424352 | 5.734645 | 6.051653   | 6.085389 | 6.427139 | 6.08656  | 6.165392 | ---      |
| 17501550 | 0.91107467 | 6.31190778 | 5.30256349 | 0.00061372 | 0.00173675 | -1.0963485 | Na7f1                 | NM_001163f | RefSeq           | Mus musculus | 5.433094 | 6.120481 | 5.636703 | 6.800974   | 6.671523 | 6.451005 | 6.612105 | 6.464535 | 6.61675  |
| 17284330 | 3.68829833 | 4.76520522 | 5.29662844 | 0.00061676 | 0.00174391 | -1.1032255 | ---                   | ---        | ---              | ---          | 3.10463  | 3.006568 | 2.707015 | 6.06778    | 6.557447 | 6.315051 | 3.346014 | 4.308415 |          |
| 17506344 | 1.406861   | 7.54609051 | 5.29646209 | 0.00061877 | 0.00174746 | -1.1052596 | Slc12a7               | NM_014458  | RefSeq           | Mus musculus | 7.068707 | 6.675794 | 6.309578 | 8.276305   | 7.901402 | 8.184955 | 8.331329 | 7.795294 | 7.290818 |
| 17594153 | 1.62056363 | 5.89634533 | 5.29258997 | 0.00062146 | 0.00175363 | -1.10996   | Slp1                  | NM_011414  | RefSeq           | Mus musculus | 4.677341 | 4.941443 | 4.641475 | 6.356822   | 6.430068 | 6.334978 | 5.838295 | 7.307162 | 5.592524 |
| 17290083 | 1.25073053 | 7.18849656 | 5.28849157 | 0.00062467 | 0.00176162 | -1.1155426 | Emb                   | NM_010330  | RefSeq           | Mus musculus | 6.966864 | 5.640344 | 6.000317 | 7.81371    | 7.700142 | 7.782271 | 7.366614 | 6.597412 | 7.125223 |
| 17848448 | 0.75970083 | 7.31630556 | 5.28572312 | 0.00062685 | 0.00176615 | -1.1193149 | Ggta1                 | NM_010283  | RefSeq           | Mus musculus | 8.824567 | 5.51598  | 6.626782 | 6.280377   | 6.568591 | 6.397486 | 6.052541 | 6.447261 | 6.591635 |
| 17310816 | 1.01638267 | 7.92964633 | 5.28488189 | 0.00062751 | 0.00176712 | -1.1204614 | Cmb1                  | NM_181588  | RefSeq           | Mus musculus | 6.639774 | 7.392282 | 7.856209 | 7.893947   | 8.222694 | 7.876774 | 8.691978 | 8.990613 | ---      |
| 17432967 | 0.61139733 | 6.54980078 | 5.28151835 | 0.00063018 | 0.00177389 | -1.1250465 | Ubiad1                | NM_027873  | RefSeq           | Mus musculus | 6.21008  | 6.22657  | 5.988536 | 6.930965   | 6.599427 | 6.738986 | 6.741507 | 6.617786 | 6.88435  |
| 17317015 | 0.56886367 | 7.56681411 | 5.27600808 | 0.00063441 | 0.00178327 | -1.1322983 | Ext1                  | ENSNMUSTOX | ENSEMBL          | cdna:known i | 7.228497 | 7.252621 | 7.057802 | 7.766185   | 7.857135 | 7.967691 | 7.469183 | 7.631065 | 7.746108 |
| 17382845 | 0.63545567 | 6.67216744 | 5.26553032 | 0.000643   | 0.00180338 | -1.1468625 | C330006A16f           | NM_001256f | RefSeq           | Mus musculus | 6.421292 | 6.239954 | 5.988766 | 6.686229   | 6.872208 | 6.988842 | 6.936932 | 6.949107 | 6.975277 |
| 17278563 | 0.75671967 | 6.39882467 | 5.25754775 | 0.000645   | 0.00181796 | -1.1577684 | Tor3a                 | NM_023141  | RefSeq           | Mus musculus | 7.925509 | 7.898663 | 7.683241 | 8.35409    | 8.679384 | 8.743648 | 8.660579 | 8.62776  | 9.016598 |
| 17526267 | 0.711278   | 7.82918267 | 5.2659752  | 0.00064997 | 0.00181853 | -1.1585509 | ---                   | ---        | ---              | ---          | 7.433902 | 7.265791 | 7.476615 | 8.273069   | 7.80486  | 8.232213 | 7.97104  | 7.890124 | 8.11503  |
| 17488325 | 1.146626   | 6.53467922 | 5.2549627  | 0.00065163 | 0.00182073 | -1.161302  | 1700049G17R           | NM_028538  | RefSeq           | Mus musculus | 6.419623 | 7.501451 | 5.245492 | 6.778859   | 7.069206 | 9.667479 | 9.60162  | 7.820628 | 6.447213 |
| 17407979 | 0.90175167 | 6.33362627 | 5.25490088 | 0.00065168 | 0.00182073 | -1.1613865 | Vps45                 | NM_013841  | RefSeq           | Mus musculus | 6.087499 | 5.706014 | 5.502641 | 6.633924   | 6.597871 | 6.769614 | 6.717405 | 6.269476 | 6.71582  |
| 17339554 | 1.04419667 | 7.1991611  | 5.24870027 | 0.0006568  | 0.00183282 | -1.1698663 | Lhs                   | NM_029999  | RefSeq           | Mus musculus | 6.867677 | 7.403821 | 7.384207 | 8.468155   | 8.183743 | 8.169694 | 8.379211 | 8.535788 | 7.920246 |
| 17426299 | 0.59431433 | 7.18026644 | 5.24447071 | 0.00066032 | 0.0018386  | -1.1765636 | Cdk2                  | NM_183417  | RefSeq           | Mus musculus | 7.654058 | 6.572681 | 6.830178 | 7.208936   | 7.258512 | 7.474212 | 7.432002 | 7.74179  | 7.675829 |
| 17524170 | 0.69506167 | 6.68869306 | 5.24074152 | 0.00066344 | 0.0018454  | -1.1807584 | 5830418K08f           | NM_176976  | RefSeq           | Mus musculus | 6.334043 | 5.527605 | 6.190241 | 7.771858   | 6.762115 | 7.222101 | 6.816001 | 6.944467 | 7.002448 |
| 17412102 | 0.702338   | 6.50077811 | 5.23602853 | 0.00066741 | 0.0018542  | -1.1871217 | Ggh                   | ENSNMUSTOX | ENSEMBL          | cdna:known i | 5.969271 | 6.065809 | 6.141226 | 6.590035   | 6.812674 | 6.934671 | 6.407048 | 6.688755 | 6.698694 |
| 17506184 | 0.63764133 | 9.16842589 | 5.23270133 | 0.00067022 | 0.00186053 | -1.1937712 | Usp10                 | ENSNMUSTOX | ENSEMBL          | cdna:known i | 6.679127 | 7.01674  | 7.895052 | 9.50513    | 9.10379  | 9.227885 | 9.62324  | 9.400141 | 9.22872  |
| 17318950 | 2.065523   | 5.84710611 | 5.22757329 | 0.00067459 | 0.0018704  | -1.1987996 | Cdfrzb2               | NM_007781  | RefSeq           | Mus musculus | 5.217156 | 5.376611 | 5.125341 | 6.832513   | 6.666331 | 6.616833 | 6.52984  | 6.340959 | 6.415227 |
| 17433353 | 0.691135   | 8.16206044 | 5.22666778 | 0.0006756  | 0.00187216 | -1.2000411 | Vamp3                 | NM_009498  | RefSeq           | Mus musculus | 7.793051 | 7.815406 | 7.505214 | 8.285016   | 8.279598 | 8.628642 | 8.235693 | 8.466745 | 8.4549   |
| 17270338 | 0.63317333 | 7.391708   | 5.22184239 | 0.00068261 | 0.00188886 | -1.2115982 | Ifnar2                | NM_010509  | RefSeq           | Mus musculus | 9.053063 | 9.064325 | 8.73728  | 9.64946    | 9.475021 | 9.630139 | 9.549491 | 9.826246 | 9.540167 |
| 17447100 | 0.67435133 | 9.13148111 | 5.21634737 | 0.00068425 | 0.00189227 | -1.214199  | ---                   | ---        | ---              | ---          | 6.74955  | 6.912355 | 6.292406 | 10.09788   | 10.23787 | 10.20122 | 9.897514 | 10.0881  | 10.16413 |
| 17384856 | 1.484028   | 8.66260967 | 5.21430942 | 0.00068602 | 0.001896   | -1.2169955 | ---                   | ---        | ---              | ---          | 8.586107 | 8.61325  | 8.395232 | 9.700717   | 10.01842 | 9.727756 | 7.149166 | 8.068154 | 8.304465 |
| 17407339 | 0.80451633 | 8.725875   | 5.21188656 | 0.00068831 | 0.00189977 | -1.2203231 | ---                   | ---        | ---              | ---          | 8.516962 | 8.000267 | 7.966426 | 9.059793   | 8.89013  | 8.947281 | 8.896456 | 9.211604 | 9.043956 |
| 17206467 | 1.04324733 | 7.15860478 | 5.19807113 | 0.00070031 | 0.00193012 | -1.2393077 | ---                   | ---        | ---              | ---          | 8.789643 | 7.547118 | 7.217084 | 8.731001   | 8.794069 | 8.264417 | 8.428796 | 8.564655 | 8.09656  |
| 17373481 | 1.10623867 | 6.09724633 | 5.19315859 | 0.00070467 | 0.00194021 | -1.2460272 | Rnf39                 | ENSNMUSTOX | ENSEMBL          | cdna:known i | 5.087317 | 5.506625 | 5.399427 | 6.390003   | 6.391638 | 6.530444 | 6.105676 | 6.45122  | 7.012867 |
| 17368646 | 0.59548833 | 7.04371222 | 5.18358568 | 0.00071371 | 0.00196239 | -1.2598341 | Olfm1                 | NM_019498  | RefSeq           | Mus musculus | 6.824646 | 7.224211 | 7.1319   | 6.361419   | 7.678371 | 8.019432 | 6.202113 | 5.849336 | 6.101958 |
| 17453222 | 0.89191467 | 6.78107967 | 5.18082577 | 0.00071583 | 0.00196666 | -1.2630433 | Wbscr17               | ENSNMUSTOX | ENSEMBL          | cdna:known i | 6.368954 | 5.974769 | 6.251412 | 7.469935   | 6.868868 | 6.902116 | 6.939691 | 7.124877 | 7.159055 |
| 17301117 | 0.73087    | 6.18215859 | 5.1787408  | 0.00071773 | 0.00197111 | -1.2659157 | Trim13                | NM_023233  | RefSeq           | Mus musculus | 6.688793 | 5.9456   | 5.441205 | 6.461752   | 6.332224 | 6.544219 | 6.243672 | 6.68885  | 6.603145 |
| 17293757 | 0.63613633 | 8.02561944 | 5.16147804 | 0.0007337  | 0.0020054  | -1.2897223 | Hiat1                 | ENSNMUSTOX | ENSEMBL          | cdna:known i | 7.629416 | 7.76329  | 7.490739 | 8.107238   | 8.308334 | 8.376282 | 8.010478 | 8.381746 | 8.163052 |
| 17350301 | 0.78471133 | 7.56379144 | 5.15819857 | 0.00073677 | 0.00201103 | -1.2942496 | Ythcd2                | NM_001163f | RefSeq           | Mus musculus | 7.234231 | 6.983205 | 6.850247 | 7.568346   | 7.783943 | 8.09528  | 8.02279  | 7.830564 | 7.73126  |
| 17495790 | 1.37907067 | 6.15512189 | 5.15646328 | 0.00073852 | 0.00201401 | -1.2998074 | Crym                  | ENSNMUSTOX | ENSEMBL          | cdna:known i | 5.548661 | 5.441344 | 5.3616   | 6.9137     | 7.266173 | 6.308944 | 6.616438 | 6.15098  | 7.55857  |
| 17285710 | 1.57256333 | 6.94133822 | 5.15447348 | 0.00074029 | 0.00201664 | -1.299394  | Hist1h2br             | ENSNMUSTOX | ENSEMBL          | cdna:known i | 5.857305 | 5.806287 | 5.862219 | 7.972489   | 7.293365 | 6.977647 | 6.189549 | 7.380253 | 7.13293  |
| 17291014 | 1.57256333 | 6.94133822 | 5.15447348 | 0.00074029 | 0.00201664 | -1.299394  | Hist1h2br             | ENSNMUSTOX | ENSEMBL          | cdna:known i | 5.857305 | 5.806287 | 5.862219 | 7.972489   | 7.293365 | 6.977647 | 6.189549 | 7.380253 | 7.13293  |
| 17358521 | 1.11066667 | 7.18198566 | 5.14652976 | 0.00074783 | 0.00203521 | -1.1037079 | Pknox2                | NM_013880  | RefSeq           | Mus musculus | 6.241701 | 6.356893 | 6.909544 | 6.939217   | 7.167271 | 7.58935  | 7.846765 | 7.321733 | 7.08775  |
| 17219185 | 0.95763967 | 6.42996944 | 5.141687   | 0.00075248 | 0.00204623 | -1.1370671 | Olfm2b                | NM_177068  | RefSeq           | Mus musculus | 5.677145 | 5.920083 | 6.628793 | 6.861906   | 7.002083 | 6.624751 | 7.686874 | 7.189259 | 6.386831 |
| 17503810 | 0.809312   | 7.13904289 | 5.13203614 | 0.00076182 | 0.00206678 | -1.3304215 | Irx5                  | NM_018826  | RefSeq           | Mus musculus | 6.87544  | 6.858353 | 6.248512 | 7.461307   | 7.426357 | 7.525277 | 7.318217 | 7.328743 | 7.21188  |
| 17252489 | 0.60505667 | 7.38887867 | 5.1271664  | 0.00076654 | 0.00207754 | -1.3370954 | Rab13                 | NM_001042f | RefSeq           | Mus musculus | 7.012327 | 6.052689 | 6.650718 | 7.599339   | 7.42247  | 7.646402 | 7.574566 | 7.825997 | 7.71549  |
| 17459361 | 2.700264   | 4.53133434 | 5.12474077 | 0.0007897  | 0.0020825  | -1.3405252 | ---                   | ---        | ---              | ---          | 3.446952 | 3.24103  | 3.22065  | 9.561143   | 9.074456 | 4.97524  | 3.926188 | 3.751656 | 5.185071 |
| 17511630 | 0.87065667 | 5.91330656 | 5.12301118 | 0.00077049 | 0.00208559 | -1.3426584 | 4933436C20f           | NR_036461  | RefSeq           | Mus musculus | 5.802669 | 5.734107 | 5.438132 | 6.508986</ |          |          |          |          |          |



























































































|          |            |            |            |            |            |            |        |             |         |              |          |          |          |          |          |          |          |          |          |
|----------|------------|------------|------------|------------|------------|------------|--------|-------------|---------|--------------|----------|----------|----------|----------|----------|----------|----------|----------|----------|
| 1731408  | -0.6345897 | 8.2539244  | -0.0258427 | 0.0002564  | 0.0008568  | -0.151173  | Pp1c   | NM_133701   | RefSeq  | Mus musculus | 8.811413 | 8.824499 | 9.151405 | 8.849413 | 8.762713 | 8.875254 | 8.362612 | 8.21828  | 8.302656 |
| 1732404  | -0.636487  | 8.2006344  | -0.0240408 | 0.0002568  | 0.0008571  | -0.153525  | Prp6   | NM_026911   | RefSeq  | Mus musculus | 8.633395 | 8.405684 | 8.311057 | 7.78325  | 7.78325  | 7.855056 | 7.78276  | 7.699628 | 7.958506 |
| 1722566  | -1.693323  | 6.0268933  | -0.0239676 | 0.0002570  | 0.0008574  | -0.1540817 | ---    | ENSMUSTO001 | ENSEMBL | ncrna:snRNA  | 7.68568  | 7.301511 | 6.407299 | 5.676654 | 5.646544 | 5.571397 | 5.260201 | 5.489222 | 5.489222 |
| 1754419  | -1.8914683 | 6.13622556 | -0.029583  | 0.0002571  | 0.0008583  | -0.155378  | Hmgf5  | NM_016710   | RefSeq  | Mus musculus | 8.847682 | 6.623364 | 6.47559  | 6.053125 | 5.932248 | 5.78776  | 6.048961 | 6.545248 | 8.280922 |
| 17516837 | -0.870389  | 6.01933856 | -0.0211023 | 0.0002578  | 0.0008591  | -0.157661  | Bac1   | ENSMUSTO001 | ENSEMBL | cdna:known   | 7.446175 | 7.461421 | 7.442129 | 6.781502 | 6.617859 | 6.505312 | 6.674048 | 6.802178 | 6.262063 |
| 17391450 | -1.244993  | 7.968369   | -0.0107456 | 0.0002608  | 0.0008621  | -0.1707774 | ---    | ---         | ---     | ---          | 8.908563 | 8.99993  | 8.819911 | 7.419226 | 7.787619 | 7.325366 | 7.040706 | 7.364599 |          |
| 17203083 | -0.703907  | 6.8867033  | -0.009778  | 0.00026127 | 0.0008697  | -0.1720002 | ---    | ---         | ---     | ---          | 7.263266 | 7.275981 | 6.725083 | 6.641262 | 6.656621 | 6.465715 | 6.289143 | 6.731909 |          |
| 17476317 | -0.7774417 | 6.2490189  | -0.0020846 | 0.0002632  | 0.0008763  | -0.1812526 | Clp3   | NM_001081   | RefSeq  | Mus musculus | 7.624989 | 6.983398 | 8.52653  | 5.592865 | 5.592865 | 5.592865 | 5.592865 | 5.592865 | 5.592865 |
| 17515058 | -0.939274  | 5.95028967 | -0.0012535 | 0.0002638  | 0.0008764  | -0.1827766 | Hpn    | BC059277    | GenBank | Mus musculus | 8.906994 | 10.04778 | 10.33556 | 9.207228 | 9.237537 | 9.539996 | 9.975134 | 9.02881  | 9.304439 |
| 1738715  | -0.709463  | 7.16164378 | -0.974511  | 0.0002604  | 0.0008795  | -0.1875867 | Gdf92  | NM_008233   | RefSeq  | Mus musculus | 7.509094 | 7.571134 | 7.920499 | 6.822888 | 6.811418 | 6.946473 | 7.067072 | 6.85501  | 6.956335 |
| 17509392 | -1.829648  | 4.8713123  | -0.952083  | 0.0002667  | 0.0008842  | -0.1943779 | Mt3    | NM_013603   | RefSeq  | Mus musculus | 6.038033 | 6.566445 | 6.759955 | 4.15035  | 4.430583 | 4.186675 | 4.763389 | 3.609843 | 4.210616 |
| 1720819  | -1.883497  | 5.192414   | -0.996341  | 0.0002675  | 0.0008858  | -0.1962152 | ---    | ---         | ---     | ---          | 6.940892 | 6.691494 | 7.007875 | 5.156551 | 5.156551 | 5.156551 | 5.156551 | 5.156551 |          |
| 1720812  | -0.59148   | 7.407378   | -0.904602  | 0.0002675  | 0.0008858  | -0.1962152 | ---    | ---         | ---     | ---          | 7.29041  | 7.29041  | 7.29041  | 7.29041  | 7.29041  | 7.29041  | 7.29041  | 7.29041  |          |
| 17459716 | -0.66703   | 7.20610367 | -0.986157  | 0.0002685  | 0.0008897  | -0.201887  | Sucp1  | ENSMUSTO001 | ENSEMBL | cdna:known   | 7.498189 | 7.167509 | 7.757413 | 6.943481 | 6.885004 | 7.147171 | 6.836555 | 7.093952 | 7.018066 |
| 17312031 | -0.614936  | 6.04527267 | -0.977193  | 0.0002714  | 0.0008969  | -0.2123289 | Zp707  | NM_001081   | RefSeq  | Mus musculus | 6.214883 | 6.529208 | 6.417366 | 6.064443 | 5.927409 | 6.037093 | 5.784769 | 5.805343 | 5.726535 |
| 17297748 | -0.724316  | 6.5914804  | -0.954831  | 0.0002783  | 0.0009181  | -0.2416182 | RefSeq | NM_034392   | RefSeq  | Mus musculus | 7.013472 | 7.306258 | 8.89326  | 6.523276 | 6.291727 | 6.279946 | 6.338064 | 6.270748 | 6.431248 |
| 1722440  | -0.7343323 | 7.4302072  | -0.954782  | 0.00027862 | 0.00091823 | -0.2419549 | Rev1   | NM_019570   | RefSeq  | Mus musculus | 7.95034  | 6.696057 | 6.900054 | 7.363057 | 7.336825 | 7.0      |          |          |          |











|          |            |            |            |            |            |            |            |                     |                 |              |          |          |          |          |          |          |          |            |          |
|----------|------------|------------|------------|------------|------------|------------|------------|---------------------|-----------------|--------------|----------|----------|----------|----------|----------|----------|----------|------------|----------|
| 17546745 | -2.0393777 | 6.19411567 | -3.7627531 | 0.00503411 | 0.01025852 | -3.357994  | ---        | BC067197 // GenBank | // Mus musculus | 7.3888       | 8.10048  | 7.249117 | 5.295312 | 5.744332 | 5.348736 | 6.824495 | 4.326794 | 5.468975   |          |
| 17202965 | -0.9430147 | 6.04121756 | -3.7609053 | 0.00504788 | 0.01028307 | -3.3608863 | ---        | ---                 | ---             | 6.431407     | 6.78527  | 6.775651 | 6.252604 | 5.133394 | 5.629405 | 5.678768 | 5.855111 | 5.468975   |          |
| 17257564 | -0.913699  | 7.96096756 | -3.7573926 | 0.00507415 | 0.01032492 | -3.3663855 | ---        | ---                 | ---             | 8.141424     | 9.109262 | 8.728103 | 7.664361 | 6.747901 | 7.092965 | 7.756147 | 7.783371 | 7.698174   |          |
| 17207693 | -0.714214  | 7.11137722 | -3.7554684 | 0.0050886  | 0.01034977 | -3.3693986 | ---        | ---                 | ---             | 7.643886     | 7.70411  | 7.82101  | 6.286787 | 6.909242 | 6.610996 | 6.7512   | 7.362644 | 6.91252    |          |
| 17458465 | -1.030677  | 5.62134067 | -3.7538288 | 0.00510096 | 0.01037337 | -3.3719663 | Cdc126     | NM_175098           | RefSeq          | 6.790146     | 6.325376 | 5.616635 | 5.068714 | 5.527128 | 5.623013 | 5.184175 | 5.351563 | 5.105316   |          |
| 17270116 | -0.635227  | 7.07949311 | -3.7530115 | 0.00510712 | 0.01038438 | -3.3732463 | ---        | ---                 | ---             | 7.399601     | 7.781346 | 7.088146 | 7.06932  | 6.678782 | 6.774381 | 6.956744 | 6.75364  | 6.75364    |          |
| 17206931 | -0.6147533 | 8.18898956 | -3.7462305 | 0.00515861 | 0.01046756 | -3.3838693 | ---        | ---                 | ---             | 8.877495     | 8.232063 | 8.755334 | 8.186249 | 7.988473 | 7.82066  | 7.840111 | 7.996722 | 8.093799   |          |
| 17413474 | -0.642039  | 6.31015967 | -3.7453446 | 0.00516537 | 0.01047822 | -3.3852574 | Reck       | NM_016678           | RefSeq          | 6.851436     | 6.538091 | 6.825361 | 6.497438 | 5.861571 | 5.928769 | 6.129975 | 6.176838 | 5.981958   |          |
| 17395096 | -1.074253  | 8.71601811 | -3.7428367 | 0.00518458 | 0.01051013 | -3.3891878 | Serf2      | NM_011354           | RefSeq          | 9.335801     | 9.03247  | 9.625685 | 8.446495 | 8.596306 | 8.636209 | 7.534644 | 8.529753 | 8.70768    |          |
| 17550707 | -1.069196  | 7.03073889 | -3.7383707 | 0.00521897 | 0.01056993 | -3.3961884 | ---        | ---                 | ---             | 7.779337     | 7.706003 | 7.634992 | 6.197305 | 7.159963 | 7.157106 | 6.444037 | 6.969758 | 6.663429   |          |
| 17208991 | -1.002583  | 6.72258033 | -3.7241496 | 0.00523011 | 0.01076512 | -3.4184948 | ---        | ---                 | ---             | 7.736532     | 7.032614 | 7.63762  | 6.660219 | 6.009556 | 6.313889 | 6.786477 | 5.775956 | 5.775956   |          |
| 17304145 | -0.911707  | 7.15158844 | -3.721636  | 0.00525    | 0.01079742 | -3.4224265 | ---        | ENSNMUSTOX          | ENSEMBL         | cdna:known_i | 6.752196 | 7.030749 | 6.970754 | 6.376539 | 5.602616 | 6.052266 | 5.868979 | 4.860671   |          |
| 17548405 | -0.677455  | 9.10924822 | -3.718422  | 0.00537558 | 0.0108457  | -3.4274841 | Myl12a     | ENSNMUSTOX          | ENSEMBL         | cdna:known_i | 9.122272 | 9.56828  | 9.939139 | 8.870191 | 8.75759  | 8.912276 | 8.851961 | 8.83054    | 9.095305 |
| 17219475 | -1.3313107 | 7.04743122 | -3.7157967 | 0.00539566 | 0.01088345 | -3.4316058 | ---        | ---                 | ---             | 8.039709     | 7.9737   | 8.227497 | 6.922664 | 5.61748  | 6.398857 | 6.956744 | 6.091444 | 7.198786   |          |
| 17200023 | -1.1031077 | 6.63219989 | -3.7148708 | 0.00540398 | 0.01089524 | -3.4330596 | ---        | ---                 | ---             | 7.11906      | 7.515959 | 6.775637 | 6.134129 | 6.373996 | 5.862405 | 5.961465 | 5.946115 | 6.007412   |          |
| 17207719 | -1.2409087 | 5.5310889  | -3.7084926 | 0.00545538 | 0.01098769 | -3.4430769 | ---        | ---                 | ---             | 6.525448     | 6.026045 | 7.058974 | 4.700915 | 4.474461 | 5.124396 | 5.005854 | 4.945646 | 5.936241   |          |
| 17201731 | -0.804928  | 6.28393433 | -3.7042135 | 0.00550486 | 0.01107822 | -3.4526284 | ---        | ---                 | ---             | 5.868601     | 6.858983 | 6.8152   | 6.654652 | 6.009894 | 5.785279 | 5.904774 | 5.749103 | 6.191523   |          |
| 17201907 | -0.804928  | 6.28393433 | -3.7042135 | 0.00550486 | 0.01107822 | -3.4526284 | ---        | ---                 | ---             | 5.868601     | 6.858983 | 6.8152   | 6.654652 | 6.009894 | 5.785279 | 5.904774 | 5.749103 | 6.191523   |          |
| 17550679 | -0.8817547 | 7.43673933 | -3.7023807 | 0.00558034 | 0.01107822 | -3.452628  | ---        | ---                 | ---             | 8.143927     | 7.693981 | 8.324244 | 6.780131 | 7.081161 | 7.390322 | 7.578915 | 7.081967 | 6.856006   |          |
| 17203037 | -1.064867  | 5.88113967 | -3.6858978 | 0.0056417  | 0.01132016 | -3.4785971 | ---        | ---                 | ---             | 7.158172     | 6.694531 | 6.474339 | 5.375731 | 5.805148 | 5.35124  | 6.211248 | 4.507757 | 5.352091   |          |
| 17319366 | -1.4683917 | 7.27696411 | -3.6845122 | 0.00565755 | 0.01134704 | -3.4815638 | Cbx7       | NM_144811           | RefSeq          | 8.225901     | 8.077328 | 8.680103 | 6.227523 | 5.701111 | 5.733054 | 7.285014 | 7.503018 | 6.630915   |          |
| 17209825 | -0.6385343 | 7.06079311 | -3.6838597 | 0.00565883 | 0.01134797 | -3.4818037 | ---        | ---                 | ---             | 7.235706     | 7.992539 | 7.523417 | 6.607152 | 6.784803 | 6.567462 | 7.019441 | 6.965933 | 6.850685   |          |
| 17475216 | -0.7313287 | 9.24505878 | -3.6797145 | 0.00569385 | 0.01141366 | -3.4883266 | ---        | ---                 | ---             | 9.400033     | 10.00224 | 10.0851  | 8.768806 | 9.019314 | 8.656469 | 8.928344 | 9.347955 | 9.017088   |          |
| 17514527 | -0.80823   | 7.5620189  | -3.796379  | 0.0056945  | 0.01141366 | -3.4884472 | ---        | ---                 | ---             | 8.379007     | 7.70782  | 8.074857 | 7.314588 | 7.441236 | 7.402534 | 7.560711 | 7.68752  | 7.389522   |          |
| 17049627 | -0.690357  | 5.99896756 | -3.6775263 | 0.00571243 | 0.01144386 | -3.4917707 | A930005H10 | NR_015487           | RefSeq          | 6.634099     | 6.118649 | 6.332474 | 6.016244 | 5.872025 | 5.761743 | 5.534384 | 6.039231 | 5.681949   |          |
| 17559926 | -0.8287367 | 7.54493567 | -3.6762725 | 0.00572353 | 0.01146113 | -3.4982831 | ---        | ---                 | ---             | 8.051487     | 7.813864 | 8.422855 | 7.158424 | 7.077708 | 7.587687 | 6.919092 | 7.630146 | 7.630146   |          |
| 17548149 | -0.507047  | 6.52388111 | -3.674301  | 0.00573993 | 0.01148899 | -3.4988482 | Rhoa       | NM_016802           | RefSeq          | 6.985483     | 6.551263 | 7.099935 | 6.60466  | 6.322366 | 6.30093  | 6.080773 | 6.38412  | 6.378032   |          |
| 17550685 | -0.704373  | 7.15811933 | -3.6714502 | 0.00574634 | 0.01152789 | -3.5013367 | ---        | ---                 | ---             | 12.0867      | 12.0867  | 12.0867  | 12.0867  | 12.0867  | 12.0867  | 12.0867  | 12.0867  | 12.0867    |          |
| 17206773 | -0.702383  | 6.79930756 | -3.6698228 | 0.00577835 | 0.01154421 | -3.5038996 | ---        | ---                 | ---             | 7.162773     | 7.405816 | 7.792504 | 6.798254 | 6.990811 | 5.842832 | 6.53489  | 6.293824 | 6.35105    |          |
| 17474840 | -1.154408  | 6.40505556 | -3.6688777 | 0.00578605 | 0.01155548 | -3.505388  | ---        | ENSNMUSTOX          | ENSEMBL         | ncrna:miRNA  | 6.630187 | 7.189515 | 6.832981 | 5.991939 | 5.977718 | 6.102112 | 6.060602 | 6.407735   |          |
| 17266287 | -1.0386903 | 5.6353093  | -3.6657256 | 0.00582374 | 0.01161981 | -3.5121169 | ---        | ENSNMUSTOX          | ENSEMBL         | ncrna:miRNA  | 5.525576 | 6.581603 | 6.744466 | 5.41108  | 5.502817 | 5.26668  | 5.070415 | 5.379633   | 5.285526 |
| 17283767 | -0.76411   | 6.76689856 | -3.6657256 | 0.00583084 | 0.01162728 | -3.5134564 | Scarna13   | NM_028576           | RefSeq          | 6.905295     | 7.221371 | 7.7321   | 6.007187 | 6.592548 | 6.49715  | 6.433238 | 6.514445 | 6.809663   |          |
| 17219206 | -0.6851197 | 7.06583    | -3.6618261 | 0.00584764 | 0.01164234 | -3.5164961 | Rnu1b1     | NR_004412           | RefSeq          | 7.363533     | 7.172576 | 7.666438 | 7.080024 | 7.012537 | 7.150174 | 6.443468 | 6.576627 | 7.127093   |          |
| 17400558 | -0.6851197 | 7.06583    | -3.6618261 | 0.00584764 | 0.01164234 | -3.5164961 | Rnu1b1     | NR_004412           | RefSeq          | 7.363533     | 7.172576 | 7.666438 | 7.080024 | 7.012537 | 7.150174 | 6.443468 | 6.576627 | 7.127093   |          |
| 17400579 | -0.6851197 | 7.06583    | -3.6618261 | 0.00584764 | 0.01164234 | -3.5164961 | Rnu1b1     | NR_004412           | RefSeq          | 7.363533     | 7.172576 | 7.666438 | 7.080024 | 7.012537 | 7.150174 | 6.443468 | 6.576627 | 7.127093   |          |
| 17400588 | -0.6851197 | 7.06583    | -3.6618261 | 0.00584764 | 0.01164234 | -3.5164961 | Rnu1b1     | NR_004412           | RefSeq          | 7.363533     | 7.172576 | 7.666438 | 7.080024 | 7.012537 | 7.150174 | 6.443468 | 6.576627 | 7.127093   |          |
| 17400588 | -0.6851197 | 7.06583    | -3.6618261 | 0.00584764 | 0.01164234 | -3.5164961 | Rnu1b1     | NR_004412           | RefSeq          | 7.363533     | 7.172576 | 7.666438 | 7.080024 | 7.012537 | 7.150174 | 6.443468 | 6.576627 | 7.127093   |          |
| 17400588 | -0.6851197 | 7.06583    | -3.6618261 | 0.00584764 | 0.01164234 | -3.5164961 | Rnu1b1     | NR_004412           | RefSeq          | 7.363533     | 7.172576 | 7.666438 | 7.080024 | 7.012537 | 7.150174 | 6.443468 | 6.576627 | 7.127093   |          |
| 17400588 | -0.6851197 | 7.06583    | -3.6618261 | 0.00584764 | 0.01164234 | -3.5164961 | Rnu1b1     | NR_004412           | RefSeq          | 7.363533     | 7.172576 | 7.666438 | 7.080024 | 7.012537 | 7.150174 | 6.443468 | 6.576627 | 7.127093   |          |
| 17400588 | -0.6851197 | 7.06583    | -3.6618261 | 0.00584764 | 0.01164234 | -3.5164961 | Rnu1b1     | NR_004412           | RefSeq          | 7.363533     | 7.172576 | 7.666438 | 7.080024 | 7.012537 | 7.150174 | 6.443468 | 6.576627 | 7.127093   |          |
| 17400588 | -0.6851197 | 7.06583    | -3.6618261 | 0.00584764 | 0.01164234 | -3.5164961 | Rnu1b1     | NR_004412           | RefSeq          | 7.363533     | 7.172576 | 7.666438 | 7.080024 | 7.012537 | 7.150174 | 6.443468 | 6.576627 | 7.127093   |          |
| 17400588 | -0.6851197 | 7.06583    | -3.6618261 | 0.00584764 | 0.01164234 | -3.5164961 | Rnu1b1     | NR_004412           | RefSeq          | 7.363533     | 7.172576 | 7.666438 | 7.080024 | 7.012537 | 7.150174 | 6.443468 | 6.576627 | 7.127093   |          |
| 17400588 | -0.6851197 | 7.06583    | -3.6618261 | 0.00584764 | 0.01164234 | -3.5164961 | Rnu1b1     | NR_004412           | RefSeq          | 7.363533     | 7.172576 | 7.666438 | 7.080024 | 7.012537 | 7.150174 | 6.443468 | 6.576627 | 7.127093   |          |
| 17400588 | -0.6851197 | 7.06583    | -3.6618261 | 0.00584764 | 0.01164234 | -3.5164961 | Rnu1b1     | NR_004412           | RefSeq          | 7.363533     | 7.172576 | 7.666438 | 7.080024 | 7.012537 | 7.150174 | 6.443468 | 6.576627 | 7.127093   |          |
| 17400588 | -0.6851197 | 7.06583    | -3.6618261 | 0.00584764 | 0.01164234 | -3.5164961 | Rnu1b1     | NR_004412           | RefSeq          | 7.363533     | 7.172576 | 7.666438 | 7.080024 | 7.012537 | 7.150174 | 6.443468 | 6.576627 | 7.127093   |          |
| 17400588 | -0.6851197 | 7.06583    | -3.6618261 | 0.00584764 | 0.01164234 | -3.5164961 | Rnu1b1     | NR_004412           | RefSeq          | 7.363533     | 7.172576 | 7.666438 | 7.080024 | 7.012537 | 7.150174 | 6.443468 | 6.576627 | 7.127093   |          |
| 17400588 | -0.6851197 | 7.06583    | -3.6618261 | 0.00584764 | 0.01164234 | -3.5164961 | Rnu1b1     | NR_004412           | RefSeq          | 7.363533     | 7.172576 | 7.666438 | 7.080024 | 7.012537 | 7.150174 | 6.443468 | 6.576627 | 7.127093   |          |
| 17400588 | -0.6851197 | 7.06583    | -3.6618261 | 0.00584764 | 0.01164234 | -3.5164961 | Rnu1b1     | NR_004412           | RefSeq          | 7.363533     | 7.172576 | 7.666438 | 7.080024 | 7.012537 | 7.150174 | 6.443468 | 6.576627 | 7.127093   |          |
| 17400588 | -0.6851197 | 7.06583    | -3.6618261 | 0.00584764 | 0.01164234 | -3.5164961 | Rnu1b1     | NR_004412           | RefSeq          | 7.363533     | 7.172576 | 7.666438 | 7.080024 | 7.012537 | 7.150174 | 6.443468 | 6.576627 | 7.127093   |          |
| 17400588 | -0.6851197 | 7.06583    | -3.6618261 | 0.00584764 | 0.01164234 | -3.5164961 | Rnu1b1     | NR_004412           | RefSeq          | 7.363533     | 7.172576 | 7.666438 | 7.080024 | 7.012537 | 7.150174 | 6.443468 | 6.576627 | 7.127093   |          |
| 17400588 | -0.6851197 | 7.06583    | -3.6618261 | 0.00584764 | 0.01164234 | -3.5164961 | Rnu1b1     | NR_004412           | RefSeq          | 7.363533     | 7.172576 | 7.666438 | 7.080024 | 7.012537 | 7.150174 | 6.443468 | 6.576627 | 7.127093</ |          |





|          |            |            |            |            |            |            |       |            |         |                   |          |          |          |          |          |          |          |          |          |
|----------|------------|------------|------------|------------|------------|------------|-------|------------|---------|-------------------|----------|----------|----------|----------|----------|----------|----------|----------|----------|
| 17206205 | -0.6980607 | 6.48255644 | -2.3563979 | 0.04470208 | 0.06800783 | -5.6128953 | ---   | ---        | ---     | 6.732427          | 7.697536 | 6.895126 | 5.6559   | 5.924822 | 6.20629  | 6.904188 | 6.238054 | 6.088665 |          |
| 17287243 | -0.6102843 | 6.60878311 | -2.3524651 | 0.04498334 | 0.06836816 | -5.6191304 | ---   | ENSMUST00K | ENSEMBL | ncrna:snoRN       | 7.064312 | 6.771195 | 7.307965 | 6.03687  | 6.37485  | 6.611237 | 5.93429  | 6.451413 | 6.926916 |
| 17453130 | -0.9575933 | 5.24660267 | -2.3328519 | 0.04641249 | 0.07020036 | -5.650193  | ---   | ---        | ---     | ---               | 6.835543 | 5.795889 | 5.150969 | 4.45299  | 5.07885  | 4.995562 | 4.865043 | 5.463751 | 4.580827 |
| 17400801 | -0.7347653 | 5.58996344 | -2.332656  | 0.04642699 | 0.07020036 | -5.6505029 | ---   | ---        | ---     | ---               | 6.720506 | 5.876834 | 6.142116 | 4.789108 | 5.501457 | 4.74449  | 5.891338 | 4.962748 | 5.681074 |
| 17550627 | -0.7413417 | 10.545875  | -2.3315919 | 0.04650583 | 0.07030424 | -5.6521867 | ---   | ---        | ---     | ---               | 11.22816 | 10.31559 | 11.09754 | 10.81206 | 10.51409 | 10.52817 | 9.493185 | 10.2867  | 10.63738 |
| 17202951 | -1.2244507 | 5.58504967 | -2.3282313 | 0.0467557  | 0.07065113 | -5.6575029 | ---   | ---        | ---     | ---               | 6.382165 | 6.510949 | 5.738357 | 6.000873 | 5.378967 | 5.296017 | 5.743431 | 5.59409  | 3.620598 |
| 17441808 | -0.6522797 | 9.86357156 | -2.3218477 | 0.04723401 | 0.07129614 | -5.6675967 | ---   | ENSMUST00K | ENSEMBL | ncrna:snoRN       | 9.713607 | 10.29275 | 10.87525 | 9.414723 | 9.641303 | 9.909743 | 9.696502 | 9.341357 | 9.886909 |
| 17360537 | -0.6821523 | 7.36206356 | -2.3145488 | 0.04778686 | 0.07204429 | -5.6791304 | Habp2 | ENSMUST00K | ENSEMBL | cdna:known        | 7.730125 | 7.824006 | 8.297848 | 6.992418 | 6.615283 | 6.99337  | 7.536726 | 7.710135 | 6.558661 |
| 17207155 | -0.59811   | 5.50441589 | -2.3130742 | 0.04789933 | 0.07219028 | -5.6814596 | ---   | ---        | ---     | ---               | 6.560603 | 5.681766 | 5.817377 | 5.375556 | 4.838048 | 5.000977 | 5.767963 | 5.150803 | 5.34665  |
| 17435946 | -0.6023593 | 7.05295356 | -2.3027167 | 0.04869676 | 0.07325448 | -5.6978105 | Preb  | NM_016703  | RefSeq  | // Re Mus musculu | 7.211809 | 7.122618 | 7.314913 | 7.71763  | 6.631321 | 7.636029 | 6.403908 | 6.746526 | 6.692028 |
| 17203367 | -0.698709  | 5.96802389 | -2.297083  | 0.04913601 | 0.07382924 | -5.7066971 | ---   | ---        | ---     | ---               | 7.005348 | 6.09547  | 6.567222 | 5.95554  | 5.277015 | 5.239707 | 6.257312 | 5.389223 | 5.925378 |
| 17208459 | -0.8160757 | 5.51231311 | -2.2867684 | 0.04995043 | 0.07485501 | -5.7229546 | ---   | ---        | ---     | ---               | 6.514089 | 5.018025 | 6.242792 | 5.335376 | 5.685386 | 5.488471 | 5.252758 | 4.721281 | 5.35264  |























































17284505 -2.3323723 4.50102033 -3.1010466 0.01375759 0.28491991 -3.180581 ---  
17290929 -0.702588 8.19255722 -3.0377394 0.01518564 0.29759138 -3.2799191 ---  
17203165 -0.7881993 6.46132822 -3.0346794 0.01525845 0.29795107 -3.2847252 ---  
17549190 -1.6458297 4.30158111 -2.9977952 0.01616509 0.30554885 -3.3426837 ---  
17284609 -1.874482 5.40794089 -2.9877943 0.01642041 0.30890665 -3.3584072 ---  
17284512 -1.860845 4.46751067 -2.9549577 0.01728846 0.31517323 -3.4100544 ---  
17324689 -0.8243913 8.31360433 -2.9176275 0.01833316 0.3203101 -3.4688034 ---  
17203155 -0.688004 6.39864889 -2.8902646 0.01914014 0.32578205 -3.5118838 ---  
17315388 -0.8346217 6.95826522 -2.8328238 0.02095536 0.34237801 -3.6023486 ---  
17284548 -1.2473513 5.73523178 -2.8183332 0.02144065 0.34662795 -3.625173 ---  
17427133 -0.7799963 4.91819367 -2.7864856 0.02254817 0.35710308 -3.6753356 ---  
17459288 -1.2357237 7.26710656 -2.7800864 0.02277769 0.35740077 -3.6854142 ---  
17203147 -0.7241333 6.47624311 -2.7789165 0.02281991 0.35765813 -3.6872566 ---  
17200523 -0.6765203 6.39616044 -2.7761103 0.02292151 0.35869088 -3.6916763 ---  
17290923 -0.6741377 7.54537278 -2.7747734 0.02297007 0.35869088 -3.6937818 ---  
17284530 -1.905194 4.76320522 -2.7370167 0.02438601 0.36925483 -3.7532359 ---  
17336944 -1.441451 5.71136622 -2.7084576 0.02551607 0.37741474 -3.7981903 ---  
17202425 -2.1442687 5.61267311 -2.5890379 0.03085009 0.41098852 -3.9858838 ---  
17203167 -0.678822 8.48873578 -2.4571097 0.03806846 0.4523487 -4.1923139 ---  
17459318 -1.0450377 4.55823044 -2.4492384 0.03854937 0.4557118 -4.2045867 ---  
17538832 -0.642758 7.94932933 -2.4157779 0.04066261 0.4694837 -4.2566918 ---  
17475194 -0.7959977 5.60896822 -2.3243621 0.04704503 0.49223892 -4.3984216 ---

X16801 // X GenBank // ( Mouse MRL- 3.296558 3.376097 3.166595 5.003148 6.036222 7.794155 5.379457 3.160347 3.296604  
--- --- --- 7.256124 8.025765 7.178918 9.09393 9.031048 8.565008 8.07762 8.296488 8.208114  
--- --- --- 8.194387 7.929915 8.469726 6.021327 6.257826 5.682109 5.709589 5.169004 4.718071  
--- --- --- 4.205277 3.964547 3.740173 4.618417 6.841166 4.411278 3.751311 3.53516 3.646901  
ENSMUSTOXX ENSEMBL cdna:known 3.063588 3.185363 3.694405 8.153605 7.196087 6.826087 5.213204 4.323514 7.015615  
ENSMUSTOXX ENSEMBL cdna:known 2.547368 2.433019 2.779264 6.906491 4.995669 7.11308 5.371501 4.729138 3.332066  
--- --- --- 8.659596 7.409925 8.025454 8.759266 8.735504 9.105549 8.218293 7.797421 8.111431  
--- --- --- 7.572324 7.300254 8.154932 6.315448 5.97222 5.994503 5.518196 5.663643 5.09632  
--- --- --- 7.336901 7.752718 7.585201 6.932367 7.349229 6.94512 6.626992 6.607799 5.48806  
BC018535 // GenBank // ( Mus musculu 3.546763 4.051283 3.688194 7.939842 6.680806 7.415802 6.129239 5.219128 6.946029  
AK144841 GenBank HTC Mus musculu 3.069395 2.969465 2.92646 6.585108 5.843164 6.390934 5.305108 6.127367 5.046742  
ENSMUSTOXX ENSEMBL cdna:known 5.912185 7.226246 6.889031 7.672407 8.133894 8.735533 6.242957 6.971549 7.620157  
--- --- --- 8.377813 8.146503 9.207464 5.665743 5.742456 5.955205 5.373502 4.89822 4.919282  
--- --- --- 5.65331 5.82107 6.377861 6.935323 6.562608 7.373451 6.262915 6.497423 6.081483  
--- --- --- 7.507231 6.73065 6.810807 7.979854 8.548976 7.91221 7.717816 7.357302 7.343509  
ENSMUSTOXX ENSEMBL cdna:known 3.10463 3.006568 2.707015 6.06778 6.55747 7.257858 6.513051 3.346014 4.308461  
--- --- --- 7.392482 6.306183 7.13629 5.167416 6.072141 6.20629 4.141679 3.449002 5.530813  
--- --- --- 4.489495 5.402075 5.450792 8.086475 8.0518 4.663976 5.065058 4.957504 4.346883  
ENSMUSTOXX ENSEMBL cdna:known 3.236241 3.535367 3.579119 5.5798 6.576783 4.747647 4.991538 4.752196 4.025383  
--- --- --- 8.309591 8.467518 7.980749 8.127448 8.468167 7.761575 7.928632 7.540132 6.960152  
--- --- --- 5.200595 5.399418 5.441102 6.463685 6.640793 5.309318 5.283177 4.952103 5.790523





The gene list of GO analysis for "cholesterol metabolic process" and "lipid metabolic process"

dko.up\_vs\_ptenKO-GO\_cholesterol.metabolic.process

| Gene.Symbol | ID       | logFC     | AveExpr   | t          | P.Value    | adj.P.Val | B         | mRNA.Acc | mRNA...S | mRNA...De | Wt.1     | Wt.2     | Wt.3     | Pten.KO.1 | Pten.KO.2 | Pten.KO.3 | dKO.1    | dKO.2    | dKO.3    |
|-------------|----------|-----------|-----------|------------|------------|-----------|-----------|----------|----------|-----------|----------|----------|----------|-----------|-----------|-----------|----------|----------|----------|
| FDFT1       | 17307588 | 1.7640263 | 9.9437744 | 10.203675  | 9.35E-08   | 6.73E-07  | 7.709226  | NM_01015 | RefSeq   | Mus musc  | 9.331955 | 9.410953 | 8.695513 | 10.88217  | 10.91379  | 10.93454  | 10.8704  | 11.14543 | 11.25628 |
| DHCR24      | 17416325 | 0.396318  | 9.3615034 | 4.1171308  | 0.00110534 | 0.047756  | -0.980033 | NM_05325 | RefSeq   | Mus musc  | 6.534461 | 6.715641 | 6.330526 | 9.689073  | 9.725225  | 9.79366   | 9.998202 | 10.12788 | 10.27083 |
| HSO17B7     | 17229466 | 0.3893717 | 7.3688128 | 3.3269676  | 0.00515521 | 0.1247292 | -2.502334 | NM_01045 | RefSeq   | Mus musc  | 5.883123 | 6.066469 | 5.759843 | 7.361209  | 7.41006   | 7.238533  | 7.5369   | 7.733866 | 7.907151 |
| TM7SF2      | 17361921 | -0.283403 | 7.0037843 | -2.9515136 | 0.01077472 | 0.2986015 | -2.794928 | NM_02845 | RefSeq   | Mus musc  | 7.602561 | 7.769781 | 7.473218 | 7.300327  | 7.475962  | 7.569164  | 7.433277 | 7.636192 | 7.619183 |
| HMGCR       | 17295233 | 0.2760077 | 8.827572  | 2.5426981  | 0.02383752 | 0.2939676 | -3.97948  | NM_00825 | RefSeq   | Mus musc  | 7.701959 | 7.779845 | 7.47028  | 8.293724  | 8.514388  | 8.682382  | 8.643529 | 8.915823 | 8.759165 |
| NSDHL       | 17535434 | 0.3533757 | 8.9306862 | 2.358791   | 0.03385233 | 0.3486095 | -4.308989 | NM_01095 | RefSeq   | Mus musc  | 7.801628 | 8.080045 | 7.272882 | 9.331253  | 9.329798  | 9.370353  | 9.53844  | 9.670178 | 9.882913 |
| SQLI        | 17311807 | 0.4206533 | 8.0569025 | 2.3232812  | 0.03620085 | 0.358878  | -4.371483 | NM_00925 | RefSeq   | Mus musc  | 7.352731 | 7.370426 | 6.665154 | 7.820434  | 7.661443  | 8.209739  | 8.063772 | 8.410412 | 8.479392 |
| FDPS        | 17406908 | 0.384521  | 9.3189291 | 2.3004805  | 0.03778933 | 0.3662002 | -4.411399 | NM_00125 | RefSeq   | Mus musc  | 8.846517 | 9.02453  | 8.388088 | 9.127743  | 9.299349  | 9.514259  | 9.55475  | 9.622064 | 9.9181   |
| HMGCS1      | 17290173 | 0.3345407 | 8.1554574 | 2.1669134  | 0.04849566 | 0.4111546 | -4.641678 | NM_14595 | RefSeq   | Mus musc  | 7.634947 | 7.523773 | 7.26771  | 7.912503  | 8.041177  | 8.629425  | 8.329849 | 8.605205 | 8.651673 |
| DHCR7       | 17485357 | 0.140449  | 6.8607296 | 1.296588   | 0.21631046 | 0.7077402 | -5.935548 | ENSMUST1 | ENSEMBL  | cdna:know | 6.424912 | 6.272007 | 6.149679 | 7.212109  | 7.014355  | 7.205275  | 7.185425 | 7.360678 | 7.306983 |

dko.up\_vs\_ptenKO-GO\_lipid.metabolic.process

| Gene.Symbol | ID       | logFC     | AveExpr   | t          | P.Value    | adj.P.Val | B         | mRNA.Acc | mRNA.Soi | mRNA.De   | Wt.1     | Wt.2     | Wt.3     | Pten.KO.1 | Pten.KO.2 | Pten.KO.3 | dKO.1    | dKO.2    | dKO.3    |          |
|-------------|----------|-----------|-----------|------------|------------|-----------|-----------|----------|----------|-----------|----------|----------|----------|-----------|-----------|-----------|----------|----------|----------|----------|
| FDFT1       | 17307588 | 1.7640263 | 9.9437744 | 10.203675  | 9.35E-08   | 6.73E-07  | 7.709226  | NM_01015 | RefSeq   | Mus musc  | 9.331955 | 9.410953 | 8.695513 | 10.88217  | 10.91379  | 10.93454  | 10.8704  | 11.14543 | 11.25628 |          |
| ME1         | 17529398 | 1.5719347 | 9.0307922 | 10.440246  | 4.18E-06   | 3.35E-05  | 4.34886   | NM_00865 | RefSeq   | Mus musc  | 8.039074 | 8.350331 | 7.738798 | 9.407973  | 9.327551  | 9.569396  | 9.551398 | 9.738667 | 9.553942 |          |
| ELOVL6      | 17402558 | 1.2649663 | 6.7578598 | 8.3421144  | 2.38E-05   | 0.0001268 | 2.450306  | NM_13045 | RefSeq   | Mus musc  | 5.910324 | 5.91623  | 5.739308 | 6.806093  | 7.127723  | 7.426945  | 7.159007 | 7.332209 | 7.402899 |          |
| CRABP1      | 17517416 | 2.5420413 | 5.1672394 | 6.5932428  | 0.00013557 | 0.0215901 | 1.521311  | ENSMUST1 | ENSEMBL  | cdna:know | 3.658632 | 3.73174  | 3.619957 | 4.406249  | 5.078404  | 4.449698  | 6.719263 | 6.641455 | 8.199757 |          |
| ECHDC2      | 17416616 | 1.0916403 | 10.216004 | 5.3963486  | 0.00054588 | 0.0494321 | 0.111353  | NM_02675 | RefSeq   | Mus musc  | 10.80392 | 10.61185 | 10.97329 | 9.0832    | 9.224743  | 9.832086  | 10.66945 | 10.49576 | 10.24974 |          |
| LDLR        | 17515315 | 1.237406  | 7.7620803 | 4.9069584  | 0.00101981 | 0.002651  | -1.648826 | NM_01075 | RefSeq   | Mus musc  | 7.17213  | 7.401991 | 6.6431   | 7.79395   | 7.634484  | 8.283629  | 7.949563 | 8.614085 | 8.365791 |          |
| DGKH        | 17308842 | 0.7222637 | 6.2059096 | 4.4387565  | 0.00191534 | 0.1083144 | -1.17226  | NM_00105 | RefSeq   | Mus musc  | 5.43723  | 5.823143 | 5.647686 | 5.813996  | 6.361854  | 6.213318  | 6.777809 | 6.739048 | 7.039102 |          |
| ABO         | 17383139 | 1.2406067 | 9.5731122 | 3.9485677  | 0.00383475 | 0.1629767 | -1.88273  | NM_03075 | RefSeq   | Mus musc  | 11.03709 | 10.87796 | 11.00427 | 7.779526  | 8.614475  | 8.364434  | 9.043242 | 9.210823 | 10.22619 |          |
| HSO17B7     | 17229466 | 0.3893717 | 7.3688128 | 3.3269676  | 0.00515521 | 0.1247292 | -2.502334 | NM_01045 | RefSeq   | Mus musc  | 5.883123 | 6.066469 | 5.759843 | 7.361209  | 7.41006   | 7.238533  | 7.5369   | 7.733866 | 7.907151 |          |
| TM7SF2      | 17361921 | -0.283403 | 7.0037843 | -2.9515136 | 0.01077472 | 0.2986015 | -2.794928 | NM_02845 | RefSeq   | Mus musc  | 7.602561 | 7.769781 | 7.473218 | 7.300327  | 7.475962  | 7.569164  | 7.433277 | 7.636192 | 7.619183 |          |
| RDH11       | 17282158 | -0.356338 | 7.9723748 | -2.8541602 | 0.01303395 | 0.0215022 | -4.57371  | ENSMUST1 | ENSEMBL  | cdna:know | 8.307128 | 7.779614 | 7.729496 | 7.538299  | 7.530401  | 7.678524  | 7.664716 | 7.791533 | 7.930586 |          |
| FABP5       | 17548238 | 0.83013   | 7.814566  | 2.7645596  | 0.02334459 | 0.3607122 | -3.709867 | NM_01065 | RefSeq   | Mus musc  | 8.49355  | 8.334756 | 8.007348 | 6.808993  | 7.402851  | 7.290681  | 7.826496 | 7.480343 | 8.686076 |          |
| FABP5       | 17548717 | 0.8365813 | 7.400604  | 2.7597152  | 0.02352441 | 0.3613422 | -3.717496 | NM_01065 | RefSeq   | //        | Mus musc | 8.107732 | 7.845882 | 7.649566  | 6.378377  | 6.995164  | 6.872715 | 7.41458  | 7.057515 | 8.283905 |
| ID1I        | 17285056 | 0.404012  | 7.3350738 | 2.3535065  | 0.03419243 | 0.3497684 | -4.318314 | NM_14535 | RefSeq   | Mus musc  | 6.481884 | 5.943932 | 6.029212 | 6.830572  | 6.907406  | 7.292603  | 7.06423  | 7.513444 | 7.664943 |          |
| SQLI        | 17311807 | 0.4206533 | 8.0569025 | 2.3232812  | 0.03620085 | 0.358878  | -4.371483 | NM_00925 | RefSeq   | Mus musc  | 7.352731 | 7.370426 | 6.665154 | 7.820434  | 7.661443  | 8.209739  | 8.063772 | 8.410412 | 8.479392 |          |
| FDPS        | 17406908 | 0.384521  | 9.3189291 | 2.3004805  | 0.03778933 | 0.3662002 | -4.411399 | NM_00125 | RefSeq   | Mus musc  | 8.846517 | 9.02453  | 8.388088 | 9.127743  | 9.299349  | 9.514259  | 9.55475  | 9.622064 | 9.9181   |          |
| HMGCS1      | 17290173 | 0.3345407 | 8.1554574 | 2.1669134  | 0.04849566 | 0.4111546 | -4.641678 | NM_14595 | RefSeq   | Mus musc  | 7.634947 | 7.523773 | 7.26771  | 7.912503  | 8.041177  | 8.629425  | 8.329849 | 8.605205 | 8.651673 |          |
| ACACA       | 17254395 | 0.1877053 | 7.2962032 | 2.0243792  | 0.06300099 | 0.4546438 | -4.880003 | NM_13335 | RefSeq   | Mus musc  | 6.803484 | 6.56787  | 6.913005 | 6.482045  | 6.455236  | 6.601402  | 6.716857 | 6.712352 | 6.67259  |          |
| INSIG1      | 17435584 | 0.2978103 | 8.6527676 | 1.4245262  | 0.17680258 | 0.6669408 | -5.773478 | NM_15355 | RefSeq   | Mus musc  | 9.296818 | 9.090755 | 8.682079 | 8.722754  | 8.581086  | 9.369946  | 8.758958 | 9.398549 | 9.40971  |          |
| DHCR7       | 17485357 | 0.140449  | 6.8607296 | 1.296588   | 0.21631046 | 0.7077402 | -5.935548 | ENSMUST1 | ENSEMBL  | cdna:know | 6.424912 | 6.272007 | 6.149679 | 7.212109  | 7.014355  | 7.205275  | 7.185425 | 7.360678 | 7.306983 |          |

up-regulated

|    |                                          |
|----|------------------------------------------|
| 1  | QI_HYPOXIA                               |
| 2  | FARDIN_HYPOXIA_11                        |
| 3  | ELVIDGE_HIF1A_AND_HIF2A_TARGETS_DN       |
| 4  | ELVIDGE_HYPOXIA_BY_DMOG_UP               |
| 5  | MENSE_HYPOXIA_UP                         |
| 6  | LEONARD_HYPOXIA                          |
| 7  | ELVIDGE_HIF1A_TARGETS_DN                 |
| 8  | HORTON_SREBF_TARGETS                     |
| 9  | ELVIDGE_HYPOXIA_UP                       |
| 10 | REACTOME_CHOLESTEROL_BIOSYNTHESIS        |
| 11 | WANG_ADIPOGENIC_GENES_REPRESSED_BY_SIRT1 |
| 12 | PID_HIF2PATHWAY                          |

| NES  | FDR q-val |
|------|-----------|
| 2.68 | 0         |
| 2.33 | 0         |
| 2.25 | 0.001     |
| 2.19 | 0.004     |
| 2.19 | 0.003     |
| 2.14 | 0.004     |
| 2.12 | 0.005     |
| 2.09 | 0.007     |
| 2.09 | 0.007     |
| 2.07 | 0.009     |
| 2.04 | 0.013     |
| 1.98 | 0.029     |

down-regulated

|    |                                                  |
|----|--------------------------------------------------|
| 1  | REACTOME_MUSCLE_CONTRACTION                      |
| 2  | TURASHVILI_BREAST_DUCTAL_CARCINOMA_VS_LOBULAR_NC |
| 3  | REACTOME_SMOOTH_MUSCLE_CONTRACTION               |
| 4  | RAMASWAMY_METASTASIS_DN                          |
| 5  | RICKMAN_HEAD_AND_NECK_CANCER_F                   |
| 6  | KEGG_VASCULAR_SMOOTH_MUSCLE_CONTRACTION          |
| 7  | KUNINGER_IGF1_VS_PDGF_B_TARGETS_UP               |
| 8  | KEGG_TYPE_II_DIABETES_MELLITUS                   |
| 9  | MCDOWELL_ACUTE_LUNG_INIURY_DN                    |
| 10 | ACEVEDO_FGFR1_TARGETS_IN_PROSTATE_CANCER_MODEL_I |
| 11 | BERENJENO_TRANSFORMED_BY_RHOA_REVERSIBLY_DN      |

| NES   | FDR q-val |
|-------|-----------|
| -2.32 | 0         |
| -2.28 | 0.001     |
| -2.25 | 0.001     |
| -2.22 | 0.002     |
| -2.13 | 0.013     |
| -2.1  | 0.018     |
| -2.09 | 0.02      |
| -2.06 | 0.027     |
| -2.05 | 0.026     |
| -2.03 | 0.03      |
| -1.95 | 0.065     |



| FARDIN | HYPOXIA | 1: Gene | logFC       | AveExpr     | t            | P.Value     | adj.P.Val   | B            | Probe.Set.ID | Gene.Symbol | mRNA.Accession     | Wt.1     | Wt.2     | Wt.3     | Pten.KO.1 | Pten.KO.2 | Pten.KO.3 | dKO.1    | dKO.2    | dKO.3    |
|--------|---------|---------|-------------|-------------|--------------|-------------|-------------|--------------|--------------|-------------|--------------------|----------|----------|----------|-----------|-----------|-----------|----------|----------|----------|
| 1      |         | NDRG1   | 0.768519    | 8.408385222 | 5.859328693  | 0.000311591 | 0.034958532 | 0.680346109  | 17317652     | Ndrgr1      | NM_008681          | 7.405318 | 7.571706 | 7.6366   | 8.227135  | 8.495841  | 8.655167  | 9.103369 | 9.186413 | 9.393918 |
| 2      |         | VEGFA   | 0.372742333 | 9.289029778 | 4.207808778  | 0.002644894 | 0.132334077 | -1.504648906 | 17345293     | Vegfa       | NM_001025250       | 9.325918 | 9.296744 | 9.203333 | 8.946585  | 9.183903  | 9.198035  | 9.485898 | 9.463838 | 9.497014 |
| 3      |         | MXI1    | 0.310433    | 8.118907333 | 4.315920293  | 0.002271833 | 0.122009701 | -1.348943568 | 17360331     | Mxi1        | NM_010847          | 8.369324 | 8.242222 | 8.237023 | 7.872264  | 7.84509   | 7.927795  | 8.201766 | 8.186635 | 8.188047 |
| 4      |         | AK4     | 0.856580333 | 6.723344333 | 3.355110704  | 0.009294302 | 0.253740256 | -2.786553515 | 17415932     | AK4         | NM_001177602       | 5.401408 | 5.023745 | 5.700743 | 6.52529   | 7.032701  | 7.34924   | 7.928571 | 7.473202 | 8.075199 |
| 5      |         | DDIT4   | 0.351723    | 9.296523556 | 3.770067887  | 0.004980082 | 0.192997454 | -2.151710794 | 17241032     | Ddit4       | NM_029083          | 8.802533 | 8.792494 | 8.937182 | 9.223546  | 9.487536  | 9.329585  | 9.638282 | 9.782148 | 9.675406 |
| 6      |         | PGM1    | -0.101421   | 9.30123     | -0.951826599 | 0.367706467 | 0.86880645  | -6.216413398 | 17437611     | Pgm1        | ENSMUST00000008732 | 8.863747 | 8.659768 | 8.493112 | 9.700897  | 9.632963  | 9.665493  | 9.578676 | 9.661817 | 9.454597 |
| 7      |         | KDM3A   | 0.413139667 | 8.362436889 | 3.33266502   | 0.00961922  | 0.257847    | -2.821375827 | 17467624     | Kdm3a       | NM_173001          | 8.225053 | 7.721166 | 8.0326   | 8.290712  | 8.407684  | 8.323451  | 8.817857 | 8.743073 | 8.700336 |
| 8      |         | EGLN3   | 0.589768667 | 8.905906444 | 2.773160599  | 0.023028941 | 0.367987812 | -3.698696488 | 17281084     | Egln3       | NM_028133          | 6.31747  | 6.476155 | 6.248619 | 9.678622  | 9.700932  | 10.29125  | 10.22735 | 10.32677 | 10.88599 |
| 9      |         | PDK1    | 0.297166667 | 7.166743556 | 2.464462322  | 0.037624866 | 0.462047466 | -4.183291253 | 17371847     | Pdk1        | NM_172665          | 6.887498 | 6.606426 | 6.667768 | 7.160776  | 7.198846  | 7.364128  | 7.55778  | 7.347634 | 7.709836 |
| 10     |         | ALDOC   | 0.346397    | 7.168460222 | 2.493410737  | 0.035927593 | 0.453402601 | -4.138083264 | 17253599     | Aldoc       | ENSMUST00000001753 | 6.177371 | 6.235779 | 6.054449 | 7.497267  | 7.650202  | 7.357207  | 7.82604  | 7.601494 | 8.116333 |
| 11     |         | ANGPTL4 | 0.464933333 | 5.305358222 | 2.163714327  | 0.060756953 | 0.556160281 | -4.647157404 | 17343628     | Angptl4     | ENSMUST00000000236 | 4.88493  | 5.603825 | 5.055009 | 8.459956  | 5.371284  | 5.17359   | 5.477577 | 5.878973 | 5.44308  |
| 12     |         | BNIP3   | 0.291642667 | 7.771484667 | 2.122420183  | 0.064873917 | 0.56988528  | -4.70973118  | 17497421     | Bnip3       | NM_009760          | 7.404727 | 7.034093 | 7.102582 | 7.742728  | 8.020691  | 8.000097  | 8.072637 | 8.154812 | 8.410995 |
| 13     |         | BHLHE40 | 0.308246    | 8.804370889 | 2.047029056  | 0.073102134 | 0.586841827 | -4.823054771 | 17461414     | Bhlhe40     | NM_011498          | 6.98495  | 6.487826 | 6.593832 | 9.663809  | 9.813726  | 9.646461  | 9.788114 | 10.17424 | 10.08638 |
| 14     |         | FAM162A | 0.250248333 | 8.27873     | 1.543847158  | 0.159330543 | 0.732695119 | -5.536228365 | 17330135     | Fam162a     | NM_027342          | 8.280581 | 8.084391 | 8.443453 | 8.076135  | 8.140257  | 8.258308  | 8.386084 | 8.104293 | 8.735068 |

| ELVIDGE HIF1A AND HIF2A TARGETS | Gene     | logFC       | AveExpr     | t            | P.Value     | adj.P.Val   | B            | Probe.Set.ID | Gene.Symbol | mRNA.Accession     | Wt.1     | Wt.2     | Wt.3     | Pten.KO.1 | Pten.KO.2 | Pten.KO.3 | dKO.1    | dKO.2    | dKO.3    |
|---------------------------------|----------|-------------|-------------|--------------|-------------|-------------|--------------|--------------|-------------|--------------------|----------|----------|----------|-----------|-----------|-----------|----------|----------|----------|
| 1                               | NDRG1    | 0.768519    | 8.408385222 | 5.859328693  | 0.000311591 | 0.034958532 | 0.680346109  | 17317652     | Ndrg1       | NM_008681          | 7.405318 | 7.571706 | 7.6366   | 8.227135  | 8.495841  | 8.655167  | 9.103369 | 9.186413 | 9.393918 |
| 2                               | VEGFA    | 0.372742333 | 9.289029778 | 4.207808778  | 0.002644894 | 0.132334077 | -1.504648906 | 17345293     | Vegfa       | NM_001025250       | 9.325918 | 9.296744 | 9.203333 | 8.946585  | 9.183903  | 9.198035  | 9.485898 | 9.463838 | 9.497014 |
| 3                               | MXI1     | 0.310433    | 8.118907333 | 4.315920293  | 0.002271833 | 0.122009701 | -1.348943568 | 17360331     | Mxi1        | NM_010847          | 8.369324 | 8.242222 | 8.237023 | 7.872264  | 7.84509   | 7.927795  | 8.201766 | 8.186635 | 8.188047 |
| 4                               | PKFB3    | 0.753056    | 6.130764444 | 3.73446161   | 0.005249338 | 0.197323512 | -2.205438273 | 17381630     | Pfkfb3      | NM_001177753       | 6.168668 | 5.985838 | 6.433982 | 5.540359  | 5.72048   | 5.903773  | 6.140327 | 6.388795 | 6.894658 |
| 5                               | AK4      | 0.856580333 | 6.723344333 | 3.355110704  | 0.009294302 | 0.253740256 | -2.786553515 | 17415932     | Ak4         | NM_001177602       | 5.401408 | 5.023745 | 5.700743 | 6.525297  | 7.032701  | 7.34924   | 7.928571 | 7.473202 | 8.075199 |
| 6                               | PGM1     | -0.101421   | 9.30123     | -0.951826599 | 0.367706467 | 0.86880645  | -6.216413398 | 17437611     | Pgm1        | ENSMUST00000087324 | 8.863747 | 8.659768 | 8.493112 | 9.700897  | 9.632963  | 9.665493  | 9.578676 | 9.661817 | 9.454597 |
| 7                               | SCNN1B   | 0.854902    | 7.215967333 | 3.454361129  | 0.007989901 | 0.234707307 | -2.63310657  | 17482699     | Scnn1b      | NM_011325          | 7.309454 | 7.477724 | 7.311384 | 6.533442  | 7.256416  | 6.350361  | 7.417751 | 7.318461 | 7.968713 |
| 8                               | PDGFB    | 0.524636667 | 6.536216222 | 4.664696264  | 0.001407419 | 0.088198275 | -0.858457342 | 17319380     | Pdgfb       | NM_011057          | 5.728971 | 5.8882   | 5.577099 | 6.738878  | 6.71301   | 6.576995  | 7.033694 | 7.240614 | 7.328485 |
| 9                               | SLC2A1   | 0.3971      | 10.17872211 | 2.922176002  | 0.018202583 | 0.332765229 | -3.463980714 | 17417844     | Slc2a1      | NM_011400          | 9.613961 | 9.576377 | 9.252981 | 10.23831  | 10.29117  | 10.45746  | 10.552   | 10.68579 | 10.94045 |
| 10                              | EGLN3    | 0.589768667 | 8.905906444 | 2.773160599  | 0.023028941 | 0.367987812 | -3.698696488 | 17281084     | Egl3        | NM_028133          | 6.31747  | 6.476155 | 6.248619 | 9.678622  | 9.700932  | 10.29125  | 10.22735 | 10.32677 | 10.88599 |
| 11                              | AKAP12   | 0.813803333 | 7.209620444 | 2.909318741  | 0.018574549 | 0.334421218 | -3.484223979 | 17231423     | Akap12      | NM_031185          | 7.076099 | 7.390944 | 7.577589 | 6.145289  | 7.380918  | 6.674064  | 7.706059 | 7.505086 | 7.430536 |
| 12                              | VLDLR    | 0.351426667 | 6.123277333 | 3.135929952  | 0.013031193 | 0.291462954 | -3.128208693 | 17358422     | Vldlr       | NM_013703          | 6.307638 | 6.178051 | 6.530341 | 5.777654  | 5.763363  | 5.978576  | 6.093323 | 6.266073 | 6.214477 |
| 13                              | PDK1     | 0.29716667  | 7.166743556 | 2.464462322  | 0.037624866 | 0.462047466 | -1.83291253  | 17371847     | Pdk1        | NM_172665          | 6.887498 | 6.606426 | 6.667768 | 7.160776  | 7.198846  | 7.364128  | 7.55778  | 7.347634 | 7.709836 |
| 14                              | ALDOC    | 0.346397    | 7.168460222 | 2.493410737  | 0.035927593 | 0.453402601 | -1.138083264 | 17253599     | Alldoc      | ENSMUST00000017534 | 6.177371 | 6.235779 | 6.054449 | 7.497267  | 7.650202  | 7.357207  | 7.82604  | 7.601494 | 8.116333 |
| 15                              | CCNG2    | 0.342961    | 7.546125556 | 2.556075645  | 0.032512888 | 0.436819001 | -0.039999165 | 17439184     | Ccng2       | ENSMUST00000012117 | 7.921648 | 7.644021 | 7.593466 | 7.263964  | 7.308245  | 7.291347  | 7.449344 | 7.542508 | 7.900587 |
| 16                              | CITED2   | 0.154626667 | 11.24151444 | 2.170528741  | 0.06010259  | 0.554647477 | -0.636799773 | 17231784     | Cited2      | NM_010828          | 11.92937 | 11.99363 | 12.05919 | 10.77278  | 10.82703  | 10.76397  | 10.93952 | 10.90596 | 10.98218 |
| 17                              | ERO1L    | 0.323086333 | 9.127028    | 1.694232078  | 0.126786412 | 0.689956    | -5.332681836 | 17305636     | Ero1l       | NM_015774          | 8.853773 | 8.418845 | 8.375987 | 8.947088  | 9.245816  | 9.56979   | 9.482564 | 9.449121 | 9.800268 |
| 18                              | ANGPTL4  | 0.464933333 | 5.305358222 | 2.163714327  | 0.060756953 | 0.556160281 | -4.647157404 | 17343628     | Angptl4     | ENSMUST00000002366 | 4.88493  | 5.603825 | 5.055009 | 4.859956  | 5.371284  | 5.17359   | 5.477577 | 5.878973 | 5.44308  |
| 19                              | BNIP3    | 0.291642667 | 7.771484667 | 2.122420183  | 0.064873917 | 0.569888528 | -4.70973118  | 17497421     | Bnip3       | NM_009760          | 7.404727 | 7.034093 | 7.102582 | 7.742728  | 8.020691  | 8.00097   | 8.072637 | 8.154812 | 8.410995 |
| 20                              | BHLHE40  | 0.308246    | 8.804370889 | 2.047029056  | 0.073102134 | 0.586841827 | -4.823054771 | 17461414     | Bhlhe40     | NM_011498          | 6.98495  | 6.487826 | 6.593832 | 9.663809  | 9.813726  | 9.646461  | 9.788114 | 10.17424 | 10.08638 |
| 21                              | RRAGD    | 0.374886    | 6.861495    | 1.71967694   | 0.121924304 | 0.687299988 | -5.297315061 | 17412539     | Rragd       | NM_027491          | 7.75631  | 7.592197 | 7.12787  | 6.202769  | 6.165305  | 6.708136  | 6.674912 | 6.490677 | 7.035279 |
| 22                              | FAM13A   | 0.293040333 | 6.386839889 | 2.25525998   | 0.052499869 | 0.530027709 | -4.506918445 | 17467209     | Fam13a      | ENSMUST00000089866 | 4.245535 | 4.752255 | 4.382392 | 7.181346  | 7.321364  | 7.108418  | 7.475138 | 7.482981 | 7.53213  |
| 23                              | FAM162A  | 0.250248333 | 8.27873     | 1.543847158  | 0.159330543 | 0.732695119 | -5.536228365 | 17330135     | Fam162a     | NM_027342          | 8.280581 | 8.084391 | 8.443453 | 8.076135  | 8.140257  | 8.258308  | 8.386084 | 8.104293 | 8.735068 |
| 24                              | HK2      | 0.316684667 | 8.245303444 | 1.780298046  | 0.111028307 | 0.669505956 | -5.212076826 | 17468018     | Hk2         | NM_013820          | 7.692614 | 7.038888 | 7.739301 | 8.402274  | 8.531538  | 8.459625  | 8.823783 | 8.634572 | 8.885136 |
| 25                              | KDM4B    | 0.191793    | 8.009080889 | 1.770660912  | 0.112697609 | 0.671671799 | -5.225716552 | 17338767     | Kdm4b       | NM_172132          | 8.554387 | 8.507739 | 8.680427 | 7.67334   | 7.5871    | 7.621458  | 7.824997 | 7.618685 | 8.013595 |
| 26                              | GPRC5A   | 0.200436    | 8.586545    | 1.674302363  | 0.130718753 | 0.693309321 | -5.360205433 | 17463747     | Gprc5a      | NM_181444          | 6.03667  | 5.833123 | 6.266242 | 9.632719  | 9.76442   | 9.873642  | 9.932569 | 9.91213  | 10.02739 |
| 27                              | LOX      | 0.356423    | 7.617999444 | 1.268473452  | 0.23857553  | 0.807489999 | -5.88003472  | 17354367     | Lox         | ENSMUST00000017147 | 6.896439 | 6.615007 | 6.715052 | 8.31147   | 7.762959  | 7.558685  | 8.074258 | 7.742853 | 7.652104 |
| 28                              | DSC2     | 0.17469     | 7.128815556 | 1.702574074  | 0.125173019 | 0.689956    | -5.321114646 | 17352933     | Dsc2        | 7.013035           | 6.819981 | 6.790562 | 7.038643 | 7.206868  | 7.260317  | 7.474258  | 7.298307 | 7.257333 |          |
| 29                              | ATXN1    | 0.111632667 | 9.671715444 | 1.260797972  | 0.241196463 | 0.807489999 | -5.888996749 | 17292174     | Atxn1       | NM_001199305       | 9.869347 | 9.675826 | 9.904454 | 9.559906  | 9.622612  | 9.447939  | 9.645496 | 9.624743 | 9.695116 |
| 30                              | SFXN3    | 0.110960333 | 8.503551778 | 1.15738801   | 0.278891479 | 0.829685169 | -6.006045301 | 17359803     | Sfxn3       | NM_053197          | 8.59091  | 8.594885 | 8.69359  | 8.49958   | 8.230619  | 8.429651  | 8.523081 | 8.582226 | 8.387424 |
| 31                              | DPYSL2   | 0.139425667 | 8.214966    | 1.208044526  | 0.25986499  | 0.820733586 | -5.949582398 | 17307905     | Dpysl2      | NM_009955          | 7.846865 | 7.886649 | 7.664139 | 8.261052  | 8.432053  | 8.366277  | 8.695121 | 8.309959 | 8.472579 |
| 32                              | EGLN1    | 0.10057     | 8.360554667 | 1.042078131  | 0.326371148 | 0.849424457 | -6.127917558 | 17541135     | Egl1        | NM_053207          | 8.549711 | 8.430559 | 8.33553  | 8.185415  | 8.217445  | 8.410881  | 8.303596 | 8.466919 | 8.344936 |
| 33                              | EGR1     | 0.305739    | 6.052883667 | 1.456954276  | 0.181388428 | 0.748030155 | -5.649100531 | 17494514     | Egr1        | NM_007913          | 5.168248 | 4.98057  | 6.259541 | 6.02862   | 6.255503  | 6.530999  | 6.463606 | 6.746276 | 7.46276  |
| 34                              | SERPINE1 | 0.18543     | 5.820801    | 1.001116055  | 0.344670907 | 0.861763668 | -6.16886182  | 17453819     | Serpine1    | NM_008871          | 4.456465 | 4.137804 | 4.67707  | 6.527814  | 6.429294  | 6.322682  | 6.496007 | 6.919896 | 6.358087 |
| 35                              | UPK1A    | 0.113333333 | 10.7884     | 1.101634805  | 0.301113491 | 0.840662323 | -6.066159042 | 17489214     | Upk1a       | NM_026815          | 11.49587 | 11.51774 | 11.47691 | 10.48614  | 10.39515  | 10.25125  | 10.61435 | 10.55456 | 10.30363 |

| ELVIDGE | HYPOXIA | BY | DMOG | U | Gene | logFC       | AveExpr     | t            | P.Value     | adj.P.Val   | B            | Probe.Set.ID | Gene.Symbol | mRNA.Accession     | Wt.1     | Wt.2     | Wt.3     | Pten.KO.1 | Pten.KO.2 | Pten.KO.3 | dKO.1    | dKO.2    | dKO.3    |
|---------|---------|----|------|---|------|-------------|-------------|--------------|-------------|-------------|--------------|--------------|-------------|--------------------|----------|----------|----------|-----------|-----------|-----------|----------|----------|----------|
| 1       | NDRG1   |    |      |   |      | 0.768519    | 8.408385222 | 5.859328693  | 0.000311591 | 0.034958532 | 0.680346109  | 17317652     | Ndrg1       | NM_008681          | 7.405318 | 7.571706 | 7.6366   | 8.227135  | 8.495841  | 8.655167  | 9.103369 | 9.186413 | 9.393918 |
| 2       | VEGFA   |    |      |   |      | 0.372742333 | 9.289029778 | 4.207808778  | 0.002644894 | 0.132334077 | -1.504648906 | 17345293     | Vegfa       | NM_001025250       | 9.325918 | 9.296744 | 9.203333 | 8.946585  | 9.183903  | 9.198035  | 9.485898 | 9.463838 | 9.497014 |
| 3       | MXI1    |    |      |   |      | 0.310433    | 8.118907333 | 4.315920293  | 0.002271833 | 0.122009701 | -1.348943568 | 17360331     | Mxi1        | NM_010847          | 8.369324 | 8.242222 | 8.237023 | 7.872264  | 7.84509   | 7.927795  | 8.201766 | 8.186635 | 8.188047 |
| 4       | PKFB3   |    |      |   |      | 0.753056    | 6.130764444 | 3.73446161   | 0.005249338 | 0.197323512 | -2.205438273 | 17381630     | Pfkfb3      | NM_001177753       | 6.168668 | 5.985838 | 6.433982 | 5.540359  | 5.72048   | 5.903773  | 6.140327 | 6.388795 | 6.894658 |
| 5       | AK4     |    |      |   |      | 0.856580333 | 6.723444333 | 3.355110704  | 0.009294302 | 0.253740256 | -2.786553515 | 17415932     | Ak4         | NM_001177602       | 5.401408 | 5.023745 | 5.700743 | 6.52529   | 7.032701  | 7.34924   | 7.928571 | 7.473202 | 8.075199 |
| 6       | DDIT4   |    |      |   |      | 0.351723    | 9.296523556 | 3.770067887  | 0.004980082 | 0.192997454 | -2.151710794 | 17241032     | Ddit4       | NM_029083          | 8.802533 | 8.792494 | 8.937182 | 9.223546  | 9.487536  | 9.329585  | 9.638282 | 9.782148 | 9.675406 |
| 7       | Pgm1    |    |      |   |      | -0.101421   | 9.30123     | -0.951826599 | 0.367706467 | 0.86880645  | -6.216413398 | 17437611     | Pgm1        | ENSMUST00000008732 | 8.863747 | 8.659768 | 8.493112 | 9.700897  | 9.632963  | 9.665493  | 9.578676 | 9.661817 | 9.454597 |
| 8       | KDM3A   |    |      |   |      | 0.413139667 | 8.362436889 | 3.33266502   | 0.00961922  | 0.257847    | -2.821375827 | 17467624     | Kdm3a       | NM_173001          | 8.225053 | 7.721166 | 8.0326   | 8.290712  | 8.407684  | 8.923451  | 8.817857 | 8.743073 | 8.700336 |
| 9       | SCNN1B  |    |      |   |      | 0.854902    | 7.215967333 | 3.454361129  | 0.007989901 | 0.234707307 | -2.63310657  | 17482699     | Scnn1b      | NM_011325          | 7.309454 | 7.477724 | 7.311384 | 6.533442  | 7.256416  | 6.350361  | 7.417751 | 7.318461 | 7.968713 |
| 10      | PFKP    |    |      |   |      | 0.389682    | 7.929386889 | 3.222961925  | 0.011387652 | 0.275677203 | -2.992140552 | 17290324     | Pfkp        | ENSMUST00000013870 | 6.989553 | 6.962378 | 6.803267 | 8.027163  | 8.282611  | 8.410345  | 8.615741 | 8.499722 | 8.773702 |
| 11      | NFIL3   |    |      |   |      | 0.662868667 | 7.585712    | 3.227097988  | 0.01131515  | 0.275677203 | -2.985686299 | 17292634     | Nfil3       | ENSMUST00000017106 | 7.459885 | 7.040715 | 7.64611  | 7.188009  | 7.70787   | 7.172167  | 8.165096 | 7.755701 | 8.135855 |
| 12      | SLC2A1  |    |      |   |      | 0.3971      | 10.17872211 | 2.922176002  | 0.018202583 | 0.332765229 | -3.463980714 | 17417844     | Slc2a1      | NM_011400          | 9.613961 | 9.576377 | 9.252981 | 10.23831  | 10.29117  | 10.45746  | 10.552   | 10.68579 | 10.94045 |
| 13      | EGLN3   |    |      |   |      | 0.589768667 | 8.905906444 | 2.773160599  | 0.023028941 | 0.367987812 | -3.698696488 | 17281084     | Eglfn3      | NM_028133          | 6.31747  | 6.476155 | 6.248619 | 9.678622  | 9.700932  | 10.29125  | 10.22735 | 10.32677 | 10.88599 |
| 14      | AKAP12  |    |      |   |      | 0.813803333 | 7.209620444 | 2.909318741  | 0.018574549 | 0.334421218 | -3.484223979 | 17231423     | Akap12      | NM_031185          | 7.076099 | 7.390944 | 7.577589 | 6.145289  | 7.380918  | 6.674064  | 7.706059 | 7.505086 | 7.430536 |
| 15      | VLDLR   |    |      |   |      | 0.351426667 | 6.123277333 | 3.135929952  | 0.013031193 | 0.291462954 | -3.128208693 | 17358422     | Vldlr       | NM_013703          | 6.307638 | 6.178051 | 6.530341 | 5.777654  | 5.763363  | 5.978576  | 6.093323 | 6.266073 | 6.214477 |
| 16      | PDK1    |    |      |   |      | 0.297166667 | 7.166743556 | 2.464462322  | 0.037624866 | 0.462047466 | -4.183291253 | 17371847     | Pdk1        | NM_172665          | 6.887498 | 6.606426 | 6.667768 | 7.160776  | 7.198846  | 7.364128  | 7.55778  | 7.347634 | 7.709836 |
| 17      | ALDOC   |    |      |   |      | 0.346397    | 7.168460222 | 2.493410737  | 0.035927593 | 0.453402601 | -4.138083264 | 17253599     | Aldoc       | ENSMUST0000001753  | 6.177371 | 6.235779 | 6.054449 | 7.497267  | 7.650202  | 7.357207  | 7.82604  | 7.601494 | 8.116333 |
| 18      | CCNG2   |    |      |   |      | 0.342961    | 7.546125556 | 2.556075645  | 0.032512888 | 0.436819001 | -4.039999165 | 17439184     | Cng2        | ENSMUST00000012112 | 7.921648 | 7.644021 | 7.593466 | 7.263964  | 7.308245  | 7.291347  | 7.449344 | 7.542508 | 7.900587 |
| 19      | CITED2  |    |      |   |      | 0.154626667 | 11.24151444 | 2.170528741  | 0.06010259  | 0.554647477 | -4.636799773 | 17231784     | Cited2      | NM_010828          | 11.92937 | 11.99363 | 12.05919 | 10.77278  | 10.82703  | 10.76397  | 10.93952 | 10.90596 | 10.98218 |
| 20      | ERO1L   |    |      |   |      | 0.323086333 | 9.127028    | 1.694232078  | 0.126786412 | 0.689956    | -5.332681836 | 17305636     | Ero1l       | NM_015774          | 8.853773 | 8.418845 | 8.375987 | 8.947088  | 9.245816  | 9.560979  | 9.482564 | 9.449121 | 9.800268 |
| 21      | ANGPTL4 |    |      |   |      | 0.464933333 | 5.305358222 | 2.163714327  | 0.060756953 | 0.556160281 | -4.647157404 | 17343628     | Angptl4     | ENSMUST00000000236 | 4.88493  | 5.603825 | 5.055009 | 4.859956  | 5.371284  | 5.17359   | 5.477577 | 5.878973 | 5.44308  |
| 22      | BNIP3   |    |      |   |      | 0.291642667 | 7.771484667 | 2.122420183  | 0.064873917 | 0.56988528  | -4.70973118  | 17497421     | Bnip3       | NM_009760          | 7.404727 | 7.034093 | 7.102582 | 7.742728  | 8.020691  | 8.000097  | 8.072637 | 8.154812 | 8.410995 |
| 23      | TMEFF1  |    |      |   |      | 0.331719333 | 6.937792556 | 2.162658098  | 0.060859001 | 0.556653793 | -4.648762048 | 17414017     | Tmeff1      | NM_021436          | 6.637043 | 6.180266 | 6.155456 | 7.154461  | 7.04884   | 7.032804  | 7.651689 | 7.322225 | 7.247349 |
| 24      | BHLHE40 |    |      |   |      | 0.308246    | 8.804370889 | 2.047029056  | 0.073102134 | 0.586841827 | -4.823054771 | 17461414     | Bhlhe40     | NM_011498          | 6.98495  | 6.487826 | 6.593832 | 9.663809  | 9.813726  | 9.646461  | 9.788114 | 10.17424 | 10.08638 |
| 25      | RRAGD   |    |      |   |      | 0.374886    | 6.861495    | 1.71967694   | 0.121924304 | 0.687299988 | -5.297315061 | 17412539     | Rragd       | NM_027491          | 7.75631  | 7.592197 | 7.12787  | 6.202769  | 6.165305  | 6.708136  | 6.674912 | 6.490677 | 7.035279 |
| 26      | FAM13A  |    |      |   |      | 0.293040333 | 6.386839889 | 2.255525998  | 0.052499869 | 0.530027709 | -4.506918445 | 17467209     | Fam13a      | ENSMUST00000008986 | 4.245535 | 4.752255 | 4.382392 | 7.181346  | 7.321364  | 7.108418  | 7.475138 | 7.482981 | 7.53213  |
| 27      | FAM162A |    |      |   |      | 0.250248333 | 8.27873     | 1.543847158  | 0.159330543 | 0.732695119 | -5.536228365 | 17330135     | Fam162a     | NM_027342          | 8.280581 | 8.084391 | 8.443453 | 8.076135  | 8.140257  | 8.258308  | 8.386804 | 8.104293 | 8.735068 |
| 28      | HK2     |    |      |   |      | 0.316684667 | 8.245303444 | 1.780298046  | 0.111028307 | 0.669505956 | -5.212076826 | 17468018     | HK2         | NM_013820          | 7.692614 | 7.038888 | 7.739301 | 8.402274  | 8.531358  | 8.459625  | 8.823783 | 8.634572 | 8.885136 |

| MENSE | HYPOXIA | U            | Gene | logFC       | AveExpr     | t           | P.Value     | adj.P.Val   | B            | Probe.Set.I.C | Gene.Symbol  | mRNAAccession      | Wt.1     | Wt.2     | Wt.3     | Pten.KO.1 | Pten.KO.2 | Pten.KO.3 | dKO.1    | dKO.2    | dKO.3    |
|-------|---------|--------------|------|-------------|-------------|-------------|-------------|-------------|--------------|---------------|--------------|--------------------|----------|----------|----------|-----------|-----------|-----------|----------|----------|----------|
| 1     |         | NDRG1        |      | 0.768519    | 8.408385222 | 5.859328693 | 0.000311591 | 0.034958532 | 0.680346109  | 17317652      | Ndrg1        | NM_008681          | 7.405318 | 7.571706 | 7.6366   | 8.227135  | 8.495841  | 8.655167  | 9.103369 | 9.186413 | 9.393918 |
| 2     |         | VEGFA        |      | 0.372742333 | 9.289029778 | 4.207808778 | 0.002644894 | 0.132334077 | -1.504648906 | 17345293      | Vegfa        | NM_001025250       | 9.325918 | 9.296744 | 9.203333 | 8.946585  | 9.183903  | 9.198035  | 9.485898 | 9.463838 | 9.497014 |
| 3     |         | LOC100504606 |      | 0.726353333 | 5.063327    | 4.542577368 | 0.001660937 | 0.101346313 | -1.028107149 | 17245686      | LOC100504608 | ENSMUST00000116231 | 7.264067 | 7.417258 | 7.662928 | 3.790729  | 3.506035  | 3.226551  | 4.347995 | 4.096823 | 4.257557 |
| 4     |         | PLOD2        |      | 0.896534    | 7.031540333 | 4.293263925 | 0.002345055 | 0.123389002 | -1.381433031 | 17520364      | Plod2        | NM_001142916       | 7.225475 | 6.735408 | 6.69025  | 6.478659  | 6.802531  | 6.690374  | 7.205508 | 7.517924 | 7.937734 |
| 5     |         | MXI1         |      | 0.310433    | 8.118907333 | 4.315920293 | 0.002271833 | 0.122009701 | -1.348943568 | 17360331      | Mxi1         | NM_010847          | 8.369324 | 8.242222 | 8.237023 | 7.872264  | 7.84509   | 7.927795  | 8.201766 | 8.186635 | 8.188047 |
| 6     |         | PKFfB3       |      | 0.753056    | 6.130764444 | 3.73446161  | 0.005249338 | 0.197323512 | -2.205438273 | 17381630      | PKfB3        | NM_001177753       | 6.168668 | 5.985838 | 6.433982 | 5.540359  | 5.72048   | 5.903773  | 6.140327 | 6.388795 | 6.894658 |
| 7     |         | JMID6        |      | 0.367168667 | 7.413906667 | 3.440919697 | 0.008154653 | 0.236716222 | -2.653834859 | 17272519      | Jmid6        | NM_033398          | 7.308009 | 7.400858 | 7.643259 | 7.305985  | 7.25298   | 7.076799  | 7.535316 | 7.630946 | 7.571008 |
| 8     |         | KDM3A        |      | 0.413139667 | 8.362436889 | 3.33266502  | 0.00961922  | 0.257847    | -2.821375827 | 17467624      | Kdm3a        | NM_173001          | 8.225053 | 7.721166 | 8.0326   | 8.290712  | 8.407684  | 8.323451  | 8.817857 | 8.743073 | 8.700336 |
| 9     |         | ABCB6        |      | 0.416452    | 6.219451111 | 3.229544523 | 0.011272492 | 0.27561144  | -2.981869079 | 17224476      | Abcb6        | ENSMUST00000027396 | 7.641567 | 7.608232 | 7.401175 | 5.448306  | 5.254529  | 5.33463   | 5.794059 | 5.517003 | 5.975659 |
| 10    |         | NFI3         |      | 0.662868667 | 7.585712    | 3.227097988 | 0.01131515  | 0.275677203 | -2.98586299  | 17282634      | Nfi3         | ENSMUST00000071065 | 7.459885 | 7.040715 | 7.64611  | 7.188009  | 7.70787   | 7.172167  | 8.165096 | 7.755701 | 8.135855 |
| 11    |         | PDK1         |      | 0.297166667 | 7.166743556 | 2.464462322 | 0.037624866 | 0.462047466 | -1.183291253 | 17371847      | Pdk1         | NM_172665          | 6.887498 | 6.606426 | 6.667768 | 7.160776  | 7.198846  | 7.364128  | 7.55778  | 7.347634 | 7.709836 |
| 12    |         | ALDOC        |      | 0.346397    | 7.168460222 | 2.493410737 | 0.035927593 | 0.453402601 | -1.138083264 | 17253599      | Aldoc        | ENSMUST00000017534 | 6.177371 | 6.235779 | 6.054449 | 7.497267  | 7.650202  | 7.357207  | 7.82604  | 7.601494 | 8.116323 |
| 13    |         | ERO1L        |      | 0.323086333 | 9.127028    | 1.694232078 | 0.126786412 | 0.689956    | -5.332681836 | 17305636      | Ero1l        | NM_015774          | 8.853773 | 8.418845 | 8.375987 | 8.947088  | 9.245816  | 9.56979   | 9.482564 | 9.449121 | 9.800268 |
| 14    |         | ANGPTL4      |      | 0.464933333 | 5.305358222 | 2.163714327 | 0.060756953 | 0.556160281 | -4.647157404 | 17343628      | Angptl4      | ENSMUST0000000236C | 4.88493  | 5.603825 | 5.055009 | 4.859956  | 5.371284  | 5.17359   | 5.477577 | 5.878973 | 5.44308  |
| 15    |         | BNIP3        |      | 0.291642667 | 7.771484667 | 2.122420183 | 0.064873917 | 0.56988528  | -4.70973118  | 17497421      | Bnip3        | NM_009760          | 7.404727 | 7.034093 | 7.102582 | 7.742728  | 8.020691  | 8.000097  | 8.072637 | 8.154812 | 8.410995 |
| 16    |         | GADD45A      |      | 0.226270333 | 7.262743333 | 2.530764536 | 0.033850856 | 0.440200411 | -4.079650131 | 17467316      | Gadd45a      | NM_007836          | 6.973246 | 6.995821 | 6.897836 | 7.186231  | 7.429377  | 7.29388   | 7.446075 | 7.520306 | 7.621918 |
| 17    |         | BHLHE40      |      | 0.308246    | 8.804370889 | 2.047029056 | 0.073102134 | 0.586841827 | -4.823054771 | 17467414      | Bhlhe40      | NM_011498          | 6.98495  | 6.487826 | 6.593832 | 6.663809  | 9.813726  | 9.646461  | 9.788114 | 10.17424 | 10.08638 |
| 18    |         | PRPSAP1      |      | 0.19603     | 8.282578333 | 2.154500608 | 0.061652813 | 0.560963989 | -4.661147933 | 17272396      | Prpsap1      | NM_026364          | 8.385421 | 8.523301 | 8.408407 | 8.135416  | 8.19531   | 7.988267  | 8.419117 | 8.237948 | 8.250018 |
| 19    |         | FAM13A       |      | 0.293040333 | 6.386839889 | 2.255525998 | 0.052499869 | 0.530027709 | -4.506918445 | 17467209      | Fam13a       | ENSMUST0000008986C | 4.245535 | 4.752255 | 4.382392 | 7.181346  | 7.321364  | 7.108418  | 7.475138 | 7.482981 | 7.53213  |
| 20    |         | Ccni         |      | 0.13134     | 10.65817889 | 1.567421623 | 0.153774538 | 0.723963241 | -5.50497839  | 17449804      | Ccni         | NM_017367          | 10.98188 | 11.00413 | 10.80604 | 10.46552  | 10.37485  | 10.5284   | 10.57504 | 10.62961 | 10.55814 |
| 21    |         | FAM162A      |      | 0.250248333 | 8.27873     | 1.543847158 | 0.159330543 | 0.732695119 | -5.536228365 | 17330135      | Fam162a      | NM_027342          | 8.280581 | 8.084391 | 8.443453 | 8.076135  | 8.140257  | 8.258308  | 8.386084 | 8.104293 | 8.735068 |
| 22    |         | TIPARP       |      | 0.229429333 | 6.950676667 | 1.628411696 | 0.14020221  | 0.70954023  | -5.422966226 | 17398082      | Tiparp       | NM_178892          | 7.011963 | 7.042993 | 7.213636 | 6.510513  | 6.762003  | 7.027089  | 6.826384 | 7.088075 | 7.073434 |
| 23    |         | CLK3         |      | 0.149699333 | 8.683137667 | 1.53555592  | 0.161326981 | 0.735534864 | -5.547157316 | 17527590      | Clk3         | NM_007713          | 8.630437 | 8.895323 | 8.901101 | 8.458415  | 8.547135  | 8.63059   | 8.738637 | 8.718703 | 8.627898 |
| 24    |         | HK2          |      | 0.316684667 | 8.245303444 | 1.780298046 | 0.111028307 | 0.669505956 | -5.212076826 | 17468018      | Hk2          | NM_013820          | 7.692614 | 7.038888 | 7.739301 | 8.402274  | 8.531538  | 8.459625  | 8.823783 | 8.634572 | 8.885136 |

| LEONARD | HYPOXII | Gene    | logFC       | AveExpr     | t           | P.Value     | adj.P.Val   | B            | Probe.Set.I.C | Gene.Symbol | mRNA.Accession     | Wt.1     | Wt.2     | Wt.3     | Pten.KO.1 | Pten.KO.2 | Pten.KO.3 | dKO.1    | dKO.2    | dKO.3    |
|---------|---------|---------|-------------|-------------|-------------|-------------|-------------|--------------|---------------|-------------|--------------------|----------|----------|----------|-----------|-----------|-----------|----------|----------|----------|
| 1       |         | VEGFA   | 0.372742333 | 9.289029778 | 4.207808778 | 0.002644894 | 0.132334077 | -1.504648906 | 17345293      | Vegfa       | NM_001025250       | 9.325918 | 9.296744 | 9.203333 | 8.946585  | 9.183903  | 9.198035  | 9.485898 | 9.463838 | 9.497014 |
| 2       |         | MXI1    | 0.310433    | 8.118907333 | 4.315920293 | 0.002271833 | 0.122009701 | -1.348943568 | 17360331      | Mxi1        | NM_010847          | 8.369324 | 8.242222 | 8.237023 | 7.872264  | 7.84509   | 7.927795  | 8.201766 | 8.186635 | 8.188047 |
| 3       |         | AK4     | 0.856580333 | 6.723344333 | 3.355110704 | 0.009294302 | 0.253740256 | -2.786553515 | 17415932      | Ak4         | NM_001177602       | 5.401408 | 5.023745 | 5.700743 | 6.52529   | 7.032701  | 7.34924   | 7.928571 | 7.473202 | 8.075199 |
| 4       |         | JMJD6   | 0.367168667 | 7.413906667 | 3.440919697 | 0.008154653 | 0.236716222 | -2.653834859 | 17272519      | Jmjd6       | NM_033398          | 7.308009 | 7.400858 | 7.643259 | 7.305985  | 7.25298   | 7.076799  | 7.535316 | 7.630946 | 7.571008 |
| 5       |         | DDIT4   | 0.351723    | 9.296523556 | 3.770067887 | 0.004980082 | 0.192997454 | -2.151710794 | 17241032      | Ddit4       | NM_029083          | 8.802533 | 8.792494 | 8.937182 | 9.223546  | 9.487536  | 9.329585  | 9.638282 | 9.782148 | 9.675406 |
| 6       |         | KDM3A   | 0.413139667 | 8.362436889 | 3.33266502  | 0.00961922  | 0.257847    | -2.821375827 | 17467624      | Kdm3a       | NM_173001          | 8.225053 | 7.721166 | 8.0326   | 8.290712  | 8.407684  | 8.323451  | 8.817857 | 8.743073 | 8.700336 |
| 7       |         | PFKP    | 0.389682    | 7.929386889 | 3.222961925 | 0.011387652 | 0.275677203 | -2.992140552 | 17290324      | Pfkp        | ENSMUST00000138703 | 6.989553 | 6.962378 | 6.803267 | 8.027163  | 8.282611  | 8.410345  | 8.615741 | 8.499722 | 8.773702 |
| 8       |         | PDGFB   | 0.524636667 | 6.536216222 | 4.664696264 | 0.001407419 | 0.088198275 | -0.858457342 | 17319380      | Pdgfb       | NM_011057          | 5.728971 | 5.8882   | 5.577099 | 6.738878  | 6.71301   | 6.576995  | 7.033694 | 7.240614 | 7.328485 |
| 9       |         | NFIL3   | 0.662868667 | 7.585712    | 3.227097988 | 0.01131515  | 0.275677203 | -2.985686299 | 17292634      | Nfil3       | ENSMUST00000071065 | 7.459885 | 7.040715 | 7.64611  | 7.188009  | 7.70787   | 7.172167  | 8.165096 | 7.755701 | 8.135855 |
| 10      |         | EFNA1   | 0.585625333 | 8.835912    | 3.23832957  | 0.011120695 | 0.274306764 | -2.968165595 | 17406990      | Efn1        | ENSMUST00000118587 | 8.080307 | 8.332027 | 8.133906 | 8.733769  | 9.075707  | 8.80057   | 9.069963 | 9.509487 | 9.787472 |
| 11      |         | SLC2A1  | 0.3971      | 10.17872211 | 2.922176002 | 0.018202583 | 0.332765229 | -3.463980714 | 17417844      | Slc2a1      | NM_011400          | 9.613961 | 9.576377 | 9.252981 | 10.23831  | 10.29117  | 10.45746  | 10.552   | 10.68579 | 10.94045 |
| 12      |         | CCNG2   | 0.342961    | 7.546125556 | 2.556075645 | 0.032512888 | 0.436819001 | -4.039999165 | 17439184      | Ccng2       | ENSMUST00000121127 | 7.921648 | 7.644021 | 7.593466 | 7.263964  | 7.308245  | 7.291347  | 7.449344 | 7.542508 | 7.900587 |
| 13      |         | BNIP3   | 0.291642667 | 7.771484667 | 2.122420183 | 0.064873917 | 0.56988528  | -4.70973118  | 17497421      | Bnip3       | NM_009760          | 7.404727 | 7.034093 | 7.102582 | 7.742728  | 8.020691  | 8.000097  | 8.072637 | 8.154812 | 8.410995 |
| 14      |         | SLC16A3 | 0.32417     | 6.501570889 | 2.045421547 | 0.073288155 | 0.587020978 | -4.825457214 | 17259534      | Slc16a3     | ENSMUST00000168579 | 4.955026 | 5.005087 | 5.376447 | 6.796841  | 6.982821  | 7.322872  | 7.395701 | 7.249115 | 7.430228 |
| 15      |         | MUC1    | 0.332056333 | 7.441240889 | 2.50319778  | 0.035371366 | 0.450683284 | -4.122783495 | 17399374      | Muc1        | NM_013605          | 4.170612 | 4.01108  | 4.166291 | 8.850742  | 8.730238  | 9.232528  | 9.350342 | 9.293182 | 9.166153 |
| 16      |         | BHLHE40 | 0.308246    | 8.804370889 | 2.047029056 | 0.073102134 | 0.586841827 | -4.823054771 | 17461414      | Bhlhe40     | NM_011498          | 6.98495  | 6.487826 | 6.593832 | 9.663809  | 9.813726  | 9.646461  | 9.788114 | 10.17424 | 10.08638 |
| 17      |         | HNRNP1  | 0.076204    | 9.290443889 | 0.817934905 | 0.435928955 | 0.896423126 | -6.335627806 | 17315546      | Hnrnp1      | NM_001039129       | 9.355977 | 9.21661  | 9.427646 | 9.248657  | 9.160939  | 9.282979  | 9.230595 | 9.443992 | 9.2466   |

| ELVIDGE HF1A TARGETS | D       | PROBE    | ID         | logFC      | AveExpr     | t          | P.Value    | adj.P.Val   | B                  | mRNA.Accession | mRNA.Source                                                                                                                          | mRNA.Description | Wt.1     | Wt.2     | Wt.3     | Pten.KO.1 | Pten.KO.2 | Pten.KO.3 | dKO.1    | dKO.2    | dKO.3 |
|----------------------|---------|----------|------------|------------|-------------|------------|------------|-------------|--------------------|----------------|--------------------------------------------------------------------------------------------------------------------------------------|------------------|----------|----------|----------|-----------|-----------|-----------|----------|----------|-------|
| 1                    | NDRG1   | 1.7E+07  | 0.768339   | 8.7645884  | 6.8100887   | 9.87E-06   | 0.0112323  | 3.76198769  | NM_008841          | RefSeq         | Mus musculus 5-myc downstream regulated gene 1 (Ndrg1), mRNA.                                                                        | 7.402316         | 7.571706 | 7.6366   | 8.227135 | 8.498431  | 8.65167   | 9.303360  | 8.48443  | 8.39938  |       |
| 2                    | MUC1    | 1.7E+07  | 0.333493   | 7.7555116  | 4.3057452   | 0.0007705  | 0.037746   | -0.620415   | NM_016847          | RefSeq         | Mus musculus Muc interacting protein-1 (Muc1), transcript variant 1, mRNA.                                                           | 8.389324         | 8.242272 | 8.27023  | 8.72354  | 7.86589   | 7.87795   | 8.201768  | 8.86655  | 8.188047 |       |
| 3                    | PFkB3   | 1.7E+07  | 0.753056   | 6.5659791  | 4.2996029   | 0.0007796  | 0.0379229  | -0.6320629  | NM_001177733       | RefSeq         | Mus musculus 6-phosphofructo-2-kinase/fructose-2,6-bisphosphatase 3 (PFkB3), transcript variant 2, mRNA.                             | 6.168668         | 5.868338 | 6.433982 | 5.540359 | 5.72648   | 5.903773  | 6.540327  | 6.38979  | 6.894658 |       |
| 4                    | AAA     | 1.7E+07  | 0.6563023  | 7.5097689  | 4.25430742  | 0.0006499  | 0.0400821  | -0.718222   | NM_001177620       | RefSeq         | Mus musculus adenylate kinase 4 (AAA), nuclear gene encoding mitochondrial protein, transcript variant 1, mRNA.                      | 5.401480         | 5.037345 | 5.700743 | 6.52259  | 6.02701   | 7.34024   | 7.93877   | 7.473202 | 8.075199 |       |
| 5                    | PGM1    | 17437611 | 0.892821   | 6.4758405  | 10.564862   | 6.1E-08    | 4.70E-07   | 8.147236736 | ENSMUST00000080732 | ENSEMBL        | cdna known chromosome NCBI8375.64484175.64519594.3 gene ENSMUSG00000029171 gene biotype protein coding transcript biotype protein    | 8.861747         | 8.659768 | 8.493112 | 9.700897 | 9.632663  | 9.665493  | 9.578676  | 9.66187  | 9.454597 |       |
| 6                    | SCN1B   | 1.7E+07  | 0.835492   | 5.5804313  | 3.802674417 | 0.0020312  | 0.0739344  | -1.5844189  | NM_011325          | RefSeq         | Mus musculus sodium channel, nonvoltage-gated 1 beta (Scn1b), mRNA.                                                                  | 7.309454         | 7.477724 | 7.311384 | 6.533442 | 7.256416  | 6.350361  | 7.417751  | 7.318461 | 7.968713 |       |
| 7                    | PGCPR   | 1.7E+07  | 0.33436467 | 5.7645675  | 3.63447752  | 0.0020302  | 0.0082009  | -1.9090961  | NM_011057          | RefSeq         | Mus musculus placental derived growth factor, 8 polypeptide (Pdgfr), mRNA.                                                           | 5.738971         | 5.8882   | 5.577099 | 6.738478 | 6.71301   | 6.570995  | 7.030304  | 7.240264 | 7.128465 |       |
| 8                    | SLC2A1  | 1.7E+07  | 0.3971     | 10.187853  | 3.48378677  | 0.0037888  | 0.1066993  | -2.1999944  | NM_011400          | RefSeq         | Mus musculus solute carrier family 2 (facilitated glucose transporter), member 1 (Slc2a1), mRNA.                                     | 9.613961         | 9.763777 | 9.252881 | 10.28117 | 10.45746  | 10.532    | 10.48579  | 10.94045 |          |       |
| 9                    | ELN3    | 1.7E+07  | 0.58976867 | 9.2928158  | 3.3151607   | 0.004912   | 0.121378   | -2.434979   | NM_028133          | RefSeq         | Mus musculus EGF like homology 3 (E-Elgins) (Egln3), mRNA.                                                                           | 6.31747          | 6.476151 | 6.248619 | 6.478622 | 9.700932  | 10.29125  | 10.27793  | 10.18599 |          |       |
| 10                   | VEA4    | 1.7E+07  | 0.31432467 | 7.0180335  | 3.13201816  | 0.0073344  | 0.1337752  | -2.8372174  | NM_013703          | RefSeq         | Mus musculus very low density lipoprotein receptor (VLDLR), transcript variant 1, mRNA.                                              | 6.307631         | 6.178051 | 6.530341 | 5.775454 | 5.763363  | 5.976704  | 6.093321  | 6.166079 |          |       |
| 11                   | PKR1    | 1.7E+07  | 0.29156467 | 7.4392326  | 2.97629661  | 0.0102462  | 0.1865366  | -3.1729429  | NM_172665          | RefSeq         | Mus musculus pyruvate dehydrogenase kinase, isoenzyme 1 (PKR1), nuclear gene encoding mitochondrial protein, mRNA.                   | 6.887498         | 6.606426 | 6.467768 | 7.160776 | 7.198846  | 7.364128  | 7.55778   | 7.149784 | 7.709836 |       |
| 12                   | ALDOC   | 1.7E+07  | 0.346397   | 6.4907477  | 2.85089336  | 0.0131173  | 0.1525448  | -3.4095546  | ENSMUST00000021751 | ENSEMBL        | cdna known chromosome NCBI83711.78136470.18141281.1 gene ENSMUSG00000021750 gene biotype arnslat codine transcript biotype arnslat   | 6.177371         | 6.235779 | 6.054449 | 7.497267 | 7.603202  | 7.857207  | 7.82606   | 7.602494 | 8.116333 |       |
| 13                   | CTD2    | 1.7E+07  | 0.15463467 | 11.2071396 | 2.97593947  | 0.0238414  | 0.2860221  | -3.918973   | NM_010848          | RefSeq         | Mus musculus CtpA/B300-interacting transactivator, with Glu/Asp-rich C-terminal domain, 2 (Ctcf2), mRNA.                             | 11.92707         | 11.89363 | 12.05919 | 10.77178 | 10.82703  | 10.79397  | 10.90506  | 10.98218 |          |       |
| 14                   | EROL1   | 1.7E+07  | 0.32308833 | 9.7347233  | 2.06164536  | 0.0588638  | 0.4447102  | -4.8184896  | NM_0151774         | RefSeq         | Mus musculus EROL1-like (E. carnosialis) (Erol1), mRNA.                                                                              | 8.853773         | 8.418845 | 8.375987 | 9.847088 | 9.24816   | 9.56979   | 9.482564  | 9.49121  | 9.800268 |       |
| 15                   | ANGPTL4 | 1.7E+07  | 0.46493333 | 5.9402083  | 2.44886761  | 0.285277   | 0.246112   | -4.1487626  | ENSMUST00000002336 | ENSEMBL        | cdna known chromosome NCBI83717.12910595.13918320.1 gene ENSMUSG00000002389 gene biotype arnslat codine transcript biotype arnslat   | 4.88491          | 5.603825 | 5.055009 | 8.95956  | 5.371284  | 5.17359   | 5.477577  | 5.878973 | 5.44368  |       |
| 16                   | BNIP3   | 1.7E+07  | 0.29164267 | 7.3514021  | 2.37821053  | 0.0326299  | 0.3417462  | -4.2746743  | NM_009760          | RefSeq         | Mus musculus BCL2/adrenovirus E18 interacting protein 3 (Bnip3), nuclear gene encoding mitochondrial protein, mRNA.                  | 7.404727         | 7.034093 | 7.102582 | 7.742728 | 8.020691  | 8.000097  | 8.072637  | 8.154812 | 8.410995 |       |
| 17                   | IRAGD   | 1.7E+07  | 0.374886   | 5.4598426  | 2.00616614  | 0.0651187  | 0.4616454  | -4.9098505  | NM_027491          | RefSeq         | Mus musculus Ras-related GTP binding D (Rag), mRNA.                                                                                  | 7.76531          | 7.592197 | 7.12787  | 6.202769 | 6.165305  | 6.708136  | 6.674912  | 6.490677 | 7.035279 |       |
| 18                   | FAM162A | 1.7E+07  | 0.29504021 | 5.316569   | 1.95477943  | 0.0714502  | 0.4805393  | -4.9932744  | ENSMUST00000008986 | ENSEMBL        | cdna known chromosome NCBI83716.55882084.58974542.1 gene ENSMUSG000000037709 gene biotype arnslat codine transcript biotype arnslat  | 4.241525         | 4.752225 | 4.382392 | 7.181346 | 7.223264  | 7.084148  | 7.475126  | 7.492861 | 7.52213  |       |
| 19                   | FAM162A | 1.7E+07  | 0.25024839 | 8.0947028  | 1.89640014  | 0.0793144  | 0.4981894  | -5.0865165  | NM_027342          | RefSeq         | Mus musculus family with sequence similarity 162, member A (Fam162a), mRNA.                                                          | 8.280581         | 8.084391 | 8.443453 | 8.076135 | 8.140257  | 8.258308  | 8.380684  | 8.104793 | 8.75568  |       |
| 20                   | H2      | 1.7E+07  | 0.3168467  | 8.2970891  | 1.77890437  | 0.0974191  | 0.5412519  | -5.2679468  | NM_013820          | RefSeq         | Mus musculus hexokinase 2 (Hk2), mRNA.                                                                                               | 7.652614         | 7.038888 | 7.739301 | 8.402274 | 8.531538  | 8.469626  | 8.823783  | 8.634572 | 8.885136 |       |
| 21                   | ICM4B   | 1738307  | 0.191793   | 7.6460504  | 1.63444077  | 0.1250387  | 0.5873147  | -5.483021   | NM_171112          | RefSeq         | Mus musculus lysine (S)-specific demethylase 4B (Icm4b), mRNA.                                                                       | 8.554387         | 8.507739 | 8.480427 | 7.67334  | 7.5871    | 7.614548  | 7.834997  | 7.818865 | 8.013595 |       |
| 22                   | LOX     | 17384367 | 0.336421   | 5.65836281 | 1.49052089  | 0.15887905 | 0.63992045 | -6.68548065 | ENSMUST00000017147 | ENSEMBL        | cdna known chromosome NCBI837118.52675723.526899231.1 gene ENSMUSG00000004529 gene biotype arnslat codine transcript biotype arnslat | 6.864939         | 6.615007 | 6.715052 | 8.31147  | 7.742859  | 7.558885  | 8.307426  | 7.742859 | 7.652104 |       |
| 23                   | DISC2   | 1782919  | 0.29403333 | 5.43349788 | 2.43795568  | 0.0291774  | 0.3241274  | -5.1522446  | ENSMUST00000002924 | ENSEMBL        | cdna known chromosome NCBI83718.20189134.20118555.1 gene ENSMUSG00000004331 gene biotype arnslat codine transcript biotype arnslat   | 7.013025         | 6.819981 | 6.760512 | 7.038443 | 7.208668  | 7.260217  | 7.474258  | 7.288307 | 7.257333 |       |
| 24                   | ATN1    | 17023714 | 0.2730567  | 5.45131588 | -1.37510971 | 0.00468992 | 0.0083361  | -3.55976449 | NM_001199305       | RefSeq         | Mus musculus ataxin 1 (Atxn1), transcript variant 1, mRNA.                                                                           | 9.889347         | 9.675826 | 9.90454  | 9.559906 | 9.622632  | 9.447939  | 9.645496  | 9.624763 | 9.695116 |       |

| HORTON | SREBF   | TARGET      | Gene        | logFC       | AveExpr     | t           | P.Value      | adj.P.Val | B       | Probe.Set.ID        | Gene.Symbol | mRNA.Accession | Wt.1     | Wt.2     | Wt.3     | Pten.KO.1 | Pten.KO.2 | Pten.KO.3 | dKO.1    | dKO.2 | dKO.3 |
|--------|---------|-------------|-------------|-------------|-------------|-------------|--------------|-----------|---------|---------------------|-------------|----------------|----------|----------|----------|-----------|-----------|-----------|----------|-------|-------|
| 1      | HSD17B7 | 0.389371667 | 6.988572667 | 3.241037195 | 0.011074341 | 0.274306764 | -2.963943158 | 17229466  | Hsd17b7 | NM_010476           | 5.883123    | 6.066469       | 5.759843 | 7.361209 | 7.41006  | 7.238533  | 7.5369    | 7.733866  | 7.907151 |       |       |
| 2      | ALDOC   | 0.346397    | 7.168460222 | 2.493410737 | 0.035927593 | 0.453402601 | -4.138083264 | 17253599  | Aldoc   | ENSMUST000000017534 | 6.177371    | 6.235779       | 6.054449 | 7.497267 | 7.650202 | 7.357207  | 7.82604   | 7.601494  | 8.116333 |       |       |
| 3      | ID1I    | 0.404012    | 6.858691778 | 1.962235598 | 0.083562771 | 0.614117944 | -4.948912792 | 17285056  | Idi1    | NM_145360           | 6.481884    | 5.943932       | 6.029212 | 6.830572 | 6.907406 | 7.292603  | 7.06423   | 7.513444  | 7.664943 |       |       |
| 4      | SQLE    | 0.420653333 | 7.781500333 | 1.880014888 | 0.09506501  | 0.639331748 | -5.069104604 | 17311807  | Sqle    | NM_009270           | 7.352731    | 7.370426       | 6.665154 | 7.820434 | 7.661443 | 8.209739  | 8.063772  | 8.410412  | 8.479392 |       |       |
| 5      | FDP5    | 0.384521    | 9.255044444 | 2.119217497 | 0.065204364 | 0.56988528  | -4.714570061 | 17406908  | Fdp5    | NM_001253751        | 8.846517    | 9.02453        | 8.388088 | 9.127743 | 9.299349 | 9.514259  | 9.55475   | 9.622064  | 9.9181   |       |       |
| 6      | HMGCS1  | 0.334540667 | 8.066251333 | 1.72674631  | 0.120604383 | 0.68371971  | -5.287444959 | 17290173  | Hmgcs1  | NM_145942           | 7.634947    | 7.523773       | 7.26771  | 7.912503 | 8.041177 | 8.629425  | 8.329849  | 8.605205  | 8.651673 |       |       |
| 7      | ACACA   | 0.187705333 | 6.658315667 | 1.879826664 | 0.095092991 | 0.639331748 | -5.069377479 | 17254395  | Acaca   | NM_133360           | 6.803484    | 6.56787        | 6.913005 | 6.482045 | 6.455236 | 6.601402  | 6.716857  | 6.712352  | 6.67259  |       |       |
| 8      | LDLR    | 0.405792    | 7.762080333 | 1.604664537 | 0.145352104 | 0.714536564 | -5.455093615 | 17515315  | Ldlr    | NM_010700           | 7.17213     | 7.401991       | 6.6431   | 7.79395  | 7.634484 | 8.283629  | 7.949563  | 8.614085  | 8.365791 |       |       |
| 9      | RDH11   | 0.213203667 | 7.772255222 | 1.373103381 | 0.205174885 | 0.773407003 | -5.754324018 | 17282158  | Rdh11   | ENSMUST000000161204 | 8.307128    | 7.779614       | 7.729496 | 7.538299 | 7.530401 | 7.678524  | 7.664716  | 7.791533  | 7.930586 |       |       |
| 10     | Cyp51   | 0.197769333 | 6.935418    | 1.428889582 | 0.189066908 | 0.754652673 | -5.684739157 | 17445308  | Cyp51   | ENSMUST000000001505 | 5.78599     | 5.815735       | 5.404941 | 7.352393 | 7.359354 | 7.697647  | 7.594986  | 7.723593  | 7.684123 |       |       |
| 11     | INSIG1  | 0.297810333 | 9.034517222 | 1.129813102 | 0.289712341 | 0.835332245 | -6.036048438 | 17435584  | Insig1  | NM_153526           | 9.296818    | 9.090755       | 8.682079 | 8.722754 | 8.581086 | 9.369946  | 8.758958  | 9.398549  | 9.40971  |       |       |
| 12     | ELOVL6  | 0.177784667 | 6.757859778 | 1.163424503 | 0.276566603 | 0.82910215  | -5.999407498 | 17402558  | Elov6   | NM_130450           | 5.910324    | 5.91623        | 5.739308 | 6.806093 | 7.127723 | 7.426945  | 7.159007  | 7.332209  | 7.402899 |       |       |
| 13     | Sc5d    | 0.139921    | 8.088953556 | 1.073885102 | 0.312684581 | 0.842661379 | -6.095257188 | 17525955  | Sc5d    | NM_172769           | 7.369883    | 7.483645       | 7.237839 | 8.251631 | 8.32873  | 8.564365  | 8.375869  | 8.43807   | 8.75055  |       |       |
| 14     | DHCR7   | 0.140449    | 6.903491444 | 1.385531128 | 0.20148715  | 0.769252596 | -5.738970546 | 17485357  | Dhcr7   | ENSMUST000000141916 | 6.424912    | 6.272007       | 6.149679 | 7.212109 | 7.014355 | 7.205275  | 7.185425  | 7.360678  | 7.306983 |       |       |
| 15     | ME1     | 0.179695667 | 9.030792222 | 1.184167388 | 0.268696996 | 0.825785563 | -5.976410259 | 17529398  | Me1     | NM_008615           | 8.039074    | 8.350331       | 7.738798 | 9.407973 | 9.327551 | 9.569396  | 9.551398  | 9.738667  | 9.553942 |       |       |
| 16     | Tm7sf2  | 0.114399667 | 7.542185    | 1.02526044  | 0.333792235 | 0.855899374 | -6.144881892 | 17361921  | Tm7sf2  | NM_028454           | 7.602561    | 7.769781       | 7.473218 | 7.300327 | 7.475962 | 7.569164  | 7.433277  | 7.636192  | 7.619183 |       |       |
| 17     | FDDT1   | 0.180536667 | 10.38233678 | 0.968922588 | 0.359590367 | 0.86526711  | -6.200136213 | 17307588  | Fddt1   | NM_010191           | 9.331955    | 9.410953       | 8.695513 | 10.88217 | 10.91379 | 10.93454  | 10.8704   | 11.14543  | 11.25628 |       |       |

| ELVIDGE | HYPOXIA | UF | Gene | logFC      | AveExpr    | t          | P.Value    | adj.P.Val  | B           | Probe.Set.ID | Gene.Symbol | mRNA.Accession      | Wt.1    | Wt.2    | Wt.3    | Pten.KO.1 | Pten.KO.2 | Pten.KO.3 | dKO.1   | dKO.2   | dKO.3   |
|---------|---------|----|------|------------|------------|------------|------------|------------|-------------|--------------|-------------|---------------------|---------|---------|---------|-----------|-----------|-----------|---------|---------|---------|
| 1       | NDRG1   |    |      | 0.768519   | 8.40838522 | 5.85932869 | 0.00031159 | 0.03495853 | 0.68034611  | 17317652     | Ndrg1       | NM_008681           | 7.40532 | 7.57171 | 7.6366  | 8.22714   | 8.49584   | 8.65517   | 9.10337 | 9.18641 | 9.39392 |
| 2       | VEGFA   |    |      | 0.37274233 | 9.28902978 | 4.20780878 | 0.00264489 | 0.13233408 | -1.50464891 | 17345293     | Vegfa       | NM_001025250        | 9.32592 | 9.29674 | 9.20333 | 8.94659   | 9.1839    | 9.19804   | 9.4859  | 9.46384 | 9.49701 |
| 3       | MXI1    |    |      | 0.310433   | 8.11890733 | 4.31592029 | 0.00227183 | 0.1220097  | -1.34894357 | 17360331     | Mxi1        | NM_010847           | 8.36932 | 8.24222 | 8.23702 | 7.87226   | 7.84509   | 7.9278    | 8.20177 | 8.18664 | 8.18805 |
| 4       | PKFfb3  |    |      | 0.753056   | 6.13076444 | 3.73446161 | 0.00524934 | 0.19732351 | -2.20543827 | 17381630     | PKfbb3      | NM_001177753        | 6.16867 | 5.98584 | 6.43398 | 5.54036   | 5.72048   | 5.90377   | 6.14033 | 6.3888  | 6.89466 |
| 5       | AK4     |    |      | 0.85658033 | 6.72334433 | 3.3551107  | 0.0092943  | 0.25374026 | -2.78655352 | 17415932     | AK4         | NM_001177602        | 5.40141 | 5.02375 | 5.70074 | 6.52529   | 7.0327    | 7.34924   | 7.92857 | 7.4732  | 8.0752  |
| 6       | DDIT4   |    |      | 0.351723   | 9.29652356 | 3.77006789 | 0.00498008 | 0.19299745 | -2.15171079 | 17241032     | Ddit4       | NM_029083           | 8.80253 | 8.79249 | 8.93718 | 9.22355   | 9.48754   | 9.32959   | 9.63828 | 9.78215 | 9.67541 |
| 7       | PGM1    |    |      | -0.101421  | 9.30123    | -0.9518266 | 0.36770647 | 0.86880645 | -6.2164134  | 17437611     | Pgm1        | ENSMUST00000087324  | 8.86375 | 8.65977 | 8.49311 | 9.7009    | 9.63296   | 9.66549   | 9.57868 | 9.66182 | 9.4546  |
| 8       | KDM3A   |    |      | 0.41313967 | 8.36243689 | 3.33266502 | 0.00961922 | 0.257847   | -2.82137583 | 17467624     | Kdm3a       | NM_173001           | 8.22505 | 7.72117 | 8.0326  | 8.29071   | 8.40768   | 8.32345   | 8.81786 | 8.74307 | 8.70034 |
| 9       | SCNN1B  |    |      | 0.854902   | 7.21596733 | 3.45436113 | 0.0079899  | 0.23470731 | -2.63310657 | 17482699     | Scnn1b      | NM_011325           | 7.30945 | 7.47772 | 7.31138 | 6.53344   | 7.25642   | 6.35036   | 7.41775 | 7.31846 | 7.96871 |
| 10      | PKP     |    |      | 0.389682   | 7.92938689 | 3.22296193 | 0.01138765 | 0.2756772  | -2.99214055 | 17290324     | PKp         | ENSMUST00000138701  | 6.98955 | 6.96238 | 6.80327 | 8.02716   | 8.28261   | 8.41035   | 8.61574 | 8.49972 | 8.7737  |
| 11      | PDGFB   |    |      | 0.52463667 | 6.53621622 | 4.66469626 | 0.00140742 | 0.08819828 | -0.85845734 | 17319380     | Pdgfb       | NM_011057           | 5.72897 | 5.8882  | 5.5771  | 6.73888   | 6.71301   | 6.577     | 7.03369 | 7.24061 | 7.32849 |
| 12      | NFIL3   |    |      | 0.66286867 | 7.585712   | 3.22709799 | 0.01131515 | 0.2756772  | -2.9856863  | 17292634     | Nfil3       | ENSMUST000000711061 | 7.45989 | 7.04072 | 7.64611 | 7.18801   | 7.70787   | 7.17217   | 8.1651  | 7.7557  | 8.13586 |
| 13      | SLC2A1  |    |      | 0.3971     | 10.1787221 | 2.922176   | 0.01820258 | 0.33276523 | -3.46398071 | 17417844     | Slc2a1      | NM_011400           | 9.61396 | 9.57638 | 9.25298 | 10.2383   | 10.2912   | 10.4575   | 10.552  | 10.6858 | 10.9405 |
| 14      | PXDN    |    |      | 0.69871833 | 7.03363644 | 3.12516484 | 0.01325104 | 0.29389682 | -3.14507062 | 17274703     | Pxdn        | NM_181395           | 6.35898 | 6.6667  | 6.50272 | 7.34306   | 7.02002   | 6.47601   | 7.78202 | 7.82291 | 7.33031 |
| 15      | EGLN3   |    |      | 0.58976867 | 8.90590644 | 2.7731606  | 0.02302894 | 0.36798781 | -3.69869649 | 17281084     | Eglgn3      | NM_028133           | 6.31747 | 6.47616 | 6.24862 | 9.67862   | 9.70093   | 10.2913   | 10.2274 | 10.3268 | 10.886  |
| 16      | AKAP12  |    |      | 0.81380333 | 7.20962044 | 2.90931874 | 0.01857455 | 0.33442122 | -3.48422398 | 17231423     | Akap12      | NM_031185           | 7.0761  | 7.39094 | 7.57759 | 6.14529   | 7.38092   | 6.67406   | 7.70606 | 7.50509 | 7.43054 |
| 17      | VLDLR   |    |      | 0.35142667 | 6.12327733 | 3.13592995 | 0.01303119 | 0.29146295 | -3.12820869 | 17358422     | Vldlr       | NM_013703           | 6.30764 | 6.17805 | 6.53034 | 5.77765   | 5.76336   | 5.97858   | 6.09332 | 6.26607 | 6.21448 |
| 18      | PKD1    |    |      | 0.29716667 | 7.16674356 | 2.46446232 | 0.03762487 | 0.46204747 | -4.18329125 | 17371847     | Pdk1        | NM_172665           | 6.8875  | 6.60643 | 6.66777 | 7.16078   | 7.19885   | 7.36413   | 7.55778 | 7.34763 | 7.70984 |
| 19      | ALDOC   |    |      | 0.346397   | 7.16846022 | 2.49341074 | 0.03592759 | 0.4534026  | -4.13808326 | 17253599     | Alldoc      | ENSMUST00000017534  | 6.17737 | 6.23578 | 6.05445 | 7.49727   | 7.6502    | 7.35721   | 7.82604 | 7.60149 | 8.11633 |
| 20      | CCNG2   |    |      | 0.342961   | 7.54612556 | 2.55607565 | 0.03251289 | 0.436819   | -4.03999917 | 17439184     | Ccng2       | ENSMUST00000121121  | 7.92165 | 7.64402 | 7.59347 | 7.26396   | 7.30825   | 7.29135   | 7.44934 | 7.54251 | 7.90059 |
| 21      | CITED2  |    |      | 0.15462667 | 11.2415144 | 2.17052874 | 0.06010259 | 0.55464748 | -4.63679977 | 17231784     | Cited2      | NM_010828           | 11.9294 | 11.9936 | 12.0592 | 10.7728   | 10.827    | 10.764    | 10.9395 | 10.906  | 10.9822 |
| 22      | ERO1L   |    |      | 0.32308633 | 9.127028   | 1.69423208 | 0.12678641 | 0.689956   | -5.33268184 | 17305636     | Ero1l       | NM_015774           | 8.85377 | 8.41885 | 8.37599 | 8.94709   | 9.24582   | 9.56979   | 9.48256 | 9.44912 | 9.80027 |
| 23      | ANGPTL4 |    |      | 0.46493333 | 5.30535822 | 2.16371433 | 0.06075695 | 0.55616028 | -4.6471574  | 17343628     | Angptl4     | ENSMUST00000002361  | 4.88493 | 5.60383 | 5.05501 | 4.85996   | 5.37128   | 5.17359   | 5.47758 | 5.87897 | 5.44308 |
| 24      | BNIP3   |    |      | 0.29164267 | 7.77148467 | 2.12242018 | 0.06487392 | 0.56988528 | -4.70973118 | 17497421     | Bnip3       | NM_009760           | 7.40473 | 7.03409 | 7.10258 | 7.74273   | 8.02069   | 8.0001    | 8.07264 | 8.15481 | 8.411   |
| 25      | TMEFF1  |    |      | 0.33171933 | 6.93779256 | 2.1626581  | 0.060859   | 0.55665379 | -4.64876205 | 17414017     | Tmeff1      | NM_021436           | 6.63704 | 6.18027 | 6.15546 | 7.15446   | 7.04884   | 7.0328    | 7.65169 | 7.33223 | 7.24735 |
| 26      | BHLHE40 |    |      | 0.308246   | 8.80437089 | 2.04702906 | 0.07310213 | 0.58684183 | -4.82305477 | 17461414     | Bhlhe40     | NM_011498           | 6.98495 | 6.48783 | 6.59383 | 9.66381   | 9.81373   | 9.64646   | 9.78811 | 10.1742 | 10.0864 |
| 27      | RRAGD   |    |      | 0.374886   | 6.861495   | 1.71967694 | 0.1219243  | 0.68729999 | -5.29731506 | 17412539     | Rragd       | NM_027491           | 7.75631 | 7.5922  | 7.12787 | 6.20277   | 6.16531   | 6.70814   | 6.67491 | 6.49068 | 7.03528 |
| 28      | FAM13A  |    |      | 0.29304033 | 6.38683989 | 2.255526   | 0.05249987 | 0.53002771 | -4.50691845 | 17467209     | Fam13a      | ENSMUST00000089861  | 4.24554 | 4.75226 | 4.38239 | 7.18135   | 7.32136   | 7.10842   | 7.47514 | 7.48298 | 7.53213 |
| 29      | FAM162A |    |      | 0.25024833 | 8.27873    | 1.54384716 | 0.15933054 | 0.73269512 | -5.3622837  | 17330135     | Fam162a     | NM_027342           | 8.28058 | 8.08439 | 8.44345 | 8.07614   | 8.14026   | 8.25831   | 8.38608 | 8.10429 | 8.73507 |
| 30      | TIPARP  |    |      | 0.22942933 | 6.95067667 | 1.6284117  | 0.14020221 | 0.70954023 | -5.42296623 | 17398082     | Tiparp      | NM_178892           | 7.01196 | 7.04299 | 7.21364 | 6.51051   | 6.762     | 7.02709   | 6.82638 | 7.08808 | 7.07343 |
| 31      | HK2     |    |      | 0.31668467 | 8.24530344 | 1.78029805 | 0.11102831 | 0.66950596 | -5.21207683 | 17468018     | Hk2         | NM_013820           | 7.69261 | 7.03889 | 7.7393  | 8.40227   | 8.53154   | 8.45963   | 8.82378 | 8.63457 | 8.88514 |
| 32      | KDM4B   |    |      | 0.191793   | 8.00908089 | 1.77066091 | 0.11269761 | 0.6716718  | -5.22571655 | 17338767     | Kdm4b       | NM_172132           | 8.55439 | 8.50774 | 8.68043 | 7.67334   | 7.5871    | 7.62146   | 7.825   | 7.61869 | 8.0136  |
| 33      | CYR61   |    |      | 0.303434   | 7.89534911 | 1.73603137 | 0.11889088 | 0.68213223 | -5.27445273 | 17410974     | Cyr61       | NM_010516           | 7.04702 | 6.55454 | 6.91574 | 8.56685   | 8.0227    | 8.22572   | 8.43724 | 8.75723 | 8.53111 |
| 34      | DTNA    |    |      | 0.22306033 | 7.49446367 | 1.72437723 | 0.12104523 | 0.684475   | -5.29075473 | 17348902     | Dtna        | NM_207650           | 7.22676 | 7.30699 | 7.44662 | 7.50034   | 7.39672   | 7.50325   | 7.87333 | 7.40024 | 7.79592 |
| 35      | LOX     |    |      | 0.356423   | 7.61799944 | 1.26847345 | 0.23857553 | 0.80749    | -5.88003472 | 17354367     | Lox         | ENSMUST00000171471  | 6.89644 | 6.61501 | 6.71505 | 8.31147   | 7.76296   | 7.55869   | 8.30743 | 8.74285 | 7.6521  |

| REACTOME | CHOLESTEROL BIOSYNTHES | Gene | logFC       | AveExpr     | t           | P.Value     | adj.P.Val   | B            | Probe.Set.ID | Gene.Symbol | mRNA.Accession      | Wt.1     | Wt.2     | Wt.3     | Pten.KO.1 | Pten.KO.2 | Pten.KO.3 | dKO.1    | dKO.2    | dKO.3    |
|----------|------------------------|------|-------------|-------------|-------------|-------------|-------------|--------------|--------------|-------------|---------------------|----------|----------|----------|-----------|-----------|-----------|----------|----------|----------|
| 1        | DHCR24                 |      | 0.396318    | 8.798388667 | 3.441404885 | 0.008148644 | 0.236716222 | -2.653086343 | 17416325     | Dhcr24      | NM_053272           | 6.534461 | 6.715641 | 6.330526 | 9.689073  | 9.725225  | 9.79366   | 9.998202 | 10.12788 | 10.27083 |
| 2        | HSD17B7                |      | 0.389371667 | 6.988572667 | 3.241037195 | 0.011074341 | 0.274306764 | -2.963943158 | 17229466     | Hsd17b7     | NM_010476           | 5.883123 | 6.066469 | 5.759843 | 7.361209  | 7.41006   | 7.238533  | 7.5369   | 7.733866 | 7.907151 |
| 3        | Sc4mol                 |      | 0.391334    | 7.525551111 | 2.078839489 | 0.069513679 | 0.578291376 | -4.775391463 | 17509629     | Sc4mol      | ENSMUST000000034015 | 7.386333 | 7.00043  | 6.638791 | 7.459641  | 7.475806  | 7.829755  | 7.92695  | 7.892249 | 8.120005 |
| 4        | HMGCR                  |      | 0.276007667 | 8.306788333 | 2.112386903 | 0.065914622 | 0.570283921 | -4.724883227 | 17295233     | Hmgcr       | NM_008255           | 7.701959 | 7.779845 | 7.47028  | 8.293724  | 8.514388  | 8.682382  | 8.643529 | 8.915823 | 8.759165 |
| 5        | NSDHL                  |      | 0.353375667 | 8.919721111 | 1.876043131 | 0.095657104 | 0.640764635 | -5.074860305 | 17535434     | Nsdhl       | NM_010941           | 7.801628 | 8.080045 | 7.272882 | 9.331253  | 9.329798  | 9.370353  | 9.53844  | 9.670178 | 9.882913 |
| 6        | IDI1                   |      | 0.404012    | 6.858691778 | 1.962235598 | 0.083562771 | 0.614117944 | -4.948912792 | 17285056     | Idi1        | NM_145360           | 6.481884 | 5.943932 | 6.029212 | 6.830572  | 6.907406  | 7.292603  | 7.06423  | 7.513444 | 7.664943 |
| 7        | SQLE                   |      | 0.420653333 | 7.781500333 | 1.880014888 | 0.09506501  | 0.639331748 | -5.069104604 | 17311807     | Sqle        | NM_009270           | 7.352731 | 7.370426 | 6.665154 | 7.820434  | 7.661443  | 8.209739  | 8.063772 | 8.410412 | 8.479392 |
| 8        | FDP5                   |      | 0.384521    | 9.255044444 | 2.119217497 | 0.065204364 | 0.56988528  | -4.714570061 | 17406908     | Fdps        | NM_001253751        | 8.846517 | 9.02453  | 8.388088 | 9.127743  | 9.299349  | 9.514259  | 9.55475  | 9.622064 | 9.9181   |
| 9        | HMGCS1                 |      | 0.334540667 | 8.066251333 | 1.72674631  | 0.120604383 | 0.68371971  | -5.287444959 | 17290173     | Hmgcs1      | NM_145942           | 7.634947 | 7.523773 | 7.26771  | 7.912503  | 8.041177  | 8.629425  | 8.329849 | 8.605205 | 8.651673 |
| 10       | Cyp51                  |      | 0.197769333 | 6.935418    | 1.428889582 | 0.189066908 | 0.754652673 | -5.684739157 | 17445308     | Cyp51       | ENSMUST00000001501  | 5.78599  | 5.815735 | 5.404941 | 7.352393  | 7.359354  | 7.697647  | 7.594986 | 7.723593 | 7.684123 |
| 11       | Sc5d                   |      | 0.139921    | 8.088953556 | 1.073885102 | 0.312684581 | 0.842661379 | -6.095257188 | 17525955     | Sc5d        | NM_172769           | 7.369883 | 7.483645 | 7.237839 | 8.251631  | 8.32873   | 8.564365  | 8.375869 | 8.43807  | 8.75055  |
| 12       | DHCR7                  |      | 0.140449    | 6.903491444 | 1.385531128 | 0.20148715  | 0.769252596 | -5.738970546 | 17485357     | Dhcr7       | ENSMUST000000141916 | 6.424912 | 6.272007 | 6.149679 | 7.212109  | 7.014355  | 7.205275  | 7.185425 | 7.360678 | 7.306983 |
| 13       | TM7SF2                 |      | 0.114399667 | 7.542185    | 1.02526044  | 0.333792235 | 0.855899374 | -6.144881892 | 17361921     | Tm7sf2      | NM_028454           | 7.602561 | 7.769781 | 7.473218 | 7.300327  | 7.475962  | 7.569164  | 7.433277 | 7.636192 | 7.619183 |
| 14       | FDF1                   |      | 0.180536667 | 10.38233678 | 0.968922588 | 0.359590367 | 0.86526711  | -6.200136213 | 17307588     | Fdf1        | NM_010191           | 9.331955 | 9.410953 | 8.695513 | 10.88217  | 10.91379  | 10.93454  | 10.8704  | 11.14543 | 11.25628 |

| WANG ADIPOGENIC GENES REPRESSED BY SIF |         |             |             |             |             |             |              |          |         | Gene               | logFC    | AveExpr  | t        | P.Value  | adj.P.Val | B        | Probe.Set.ID | Gene.Symbo | mRNA.Accession | Wt.1 | Wt.2 | Wt.3 | Pten.KO.1 | Pten.KO.2 | Pten.KO.3 | dKO.1 | dKO.2 | dKO.3 |
|----------------------------------------|---------|-------------|-------------|-------------|-------------|-------------|--------------|----------|---------|--------------------|----------|----------|----------|----------|-----------|----------|--------------|------------|----------------|------|------|------|-----------|-----------|-----------|-------|-------|-------|
| 1                                      | NDRG1   | 0.768519    | 8.408385222 | 5.859328693 | 0.000311591 | 0.034958532 | 0.680346109  | 17317652 | Ndrp1   | NM_008681          | 7.405318 | 7.571706 | 7.6366   | 8.227135 | 8.495841  | 8.655167 | 9.103369     | 9.186413   | 9.393918       |      |      |      |           |           |           |       |       |       |
| 2                                      | PFKP    | 0.389682    | 7.929386889 | 3.222961925 | 0.011387652 | 0.275677203 | -2.992140552 | 17290324 | Pfkfb   | ENSMUST00000138703 | 6.989553 | 6.962378 | 6.803267 | 8.027163 | 8.282611  | 8.410345 | 8.615741     | 8.499722   | 8.773702       |      |      |      |           |           |           |       |       |       |
| 3                                      | SLC2A1  | 0.3971      | 10.17872211 | 2.922176002 | 0.018202583 | 0.332765229 | -3.463980714 | 17417844 | Slc2a1  | NM_011400          | 9.613961 | 9.576377 | 9.252981 | 10.23831 | 10.29117  | 10.45746 | 10.552       | 10.68579   | 10.94045       |      |      |      |           |           |           |       |       |       |
| 4                                      | EGLN3   | 0.589768667 | 8.905906444 | 2.773160599 | 0.023028941 | 0.367987812 | -3.698696488 | 17281084 | Egln3   | NM_028133          | 6.31747  | 6.476155 | 6.248619 | 9.678622 | 9.700932  | 10.29125 | 10.22735     | 10.32677   | 10.88599       |      |      |      |           |           |           |       |       |       |
| 5                                      | ERO1L   | 0.323086333 | 9.127028    | 1.694232078 | 0.126786412 | 0.689956    | -5.332681836 | 17305636 | Ero1l   | NM_015774          | 8.853773 | 8.418845 | 8.375987 | 8.947088 | 9.245816  | 9.56979  | 9.482564     | 9.449121   | 9.800268       |      |      |      |           |           |           |       |       |       |
| 6                                      | KLF15   | 0.394451667 | 6.678155111 | 2.031832787 | 0.074879038 | 0.589452977 | -4.8457414   | 17460826 | Klf15   | ENSMUST00000113530 | 9.029385 | 8.974455 | 9.198303 | 4.998603 | 5.593707  | 5.266639 | 5.92472      | 5.302442   | 5.815142       |      |      |      |           |           |           |       |       |       |
| 7                                      | IGFBP4  | 0.404981667 | 8.452549111 | 1.782166569 | 0.110707334 | 0.669505956 | -5.209428456 | 17256264 | Igfbp4  | NM_010517          | 7.868895 | 7.526721 | 8.039119 | 8.465321 | 8.743442  | 8.502868 | 8.852342     | 9.482787   | 8.591447       |      |      |      |           |           |           |       |       |       |
| 8                                      | PDXP    | 0.331615667 | 4.527207222 | 1.520940539 | 0.16490071  | 0.737944499 | -5.566342653 | 17312825 | Pdxp    | NM_020271          | 4.129632 | 4.569605 | 4.606837 | 4.126513 | 4.470475  | 4.624984 | 4.309672     | 4.918561   | 4.988586       |      |      |      |           |           |           |       |       |       |
| 9                                      | CHCHD10 | 0.139994333 | 9.465316111 | 1.374545951 | 0.204743862 | 0.773407003 | -5.75254628  | 17234436 | Chchd10 | NM_175329          | 8.601306 | 8.729593 | 8.851127 | 9.725285 | 9.889391  | 9.678242 | 9.793634     | 10.01633   | 9.902937       |      |      |      |           |           |           |       |       |       |
| 10                                     | Gyk     | 0.168481667 | 5.087299333 | 1.057248942 | 0.319786403 | 0.84714079  | -6.112432965 | 17543045 | Gyk     | NM_212444          | 4.527084 | 4.338653 | 4.461524 | 5.127444 | 5.225781  | 5.623269 | 5.248221     | 5.50828    | 5.725438       |      |      |      |           |           |           |       |       |       |
| 11                                     | TP1     | 0.116206667 | 11.21003556 | 1.19420732  | 0.264953889 | 0.822714198 | -5.965175585 | 17470879 | Tp1     | NM_009415          | 10.73278 | 10.65958 | 10.43454 | 11.41292 | 11.42866  | 11.51582 | 11.48382     | 11.56688   | 11.65532       |      |      |      |           |           |           |       |       |       |
| 12                                     | TRIB3   | 0.171227    | 4.716664444 | 1.121721332 | 0.292950606 | 0.837868483 | -6.044752441 | 17392925 | Trib3   | NM_175093          | 4.89445  | 5.002669 | 4.985752 | 4.331167 | 4.711043  | 4.484504 | 4.38032      | 4.709188   | 4.950887       |      |      |      |           |           |           |       |       |       |

| PID | HIF2PATHWA | Gene     | logFC        | AveExpr     | t           | P.Value     | adj.P.Val   | B            | Probe.Set.IC | Gene.Symbol | mRNA.Accession     | Wt.1     | Wt.2     | Wt.3     | Pten.KO.1 | Pten.KO.2 | Pten.KO.3 | dKO.1    | dKO.2    | dKO.3    |
|-----|------------|----------|--------------|-------------|-------------|-------------|-------------|--------------|--------------|-------------|--------------------|----------|----------|----------|-----------|-----------|-----------|----------|----------|----------|
| 1   |            | EPAS1    | 0.535955667  | 7.907344333 | 5.714181109 | 0.000370327 | 0.038778332 | 0.504969245  | 17340197     | Epas1       | NM_010137          | 7.803863 | 7.751102 | 8.034485 | 7.655934  | 7.652917  | 7.67554   | 8.193833 | 8.285648 | 8.112777 |
| 2   |            | VEGFA    | 0.372742333  | 9.289029778 | 4.207808778 | 0.002644894 | 0.132334077 | -1.504648906 | 17345293     | Vegfa       | NM_001025250       | 9.325918 | 9.296744 | 9.203333 | 8.946585  | 9.183903  | 9.198035  | 9.485898 | 9.463838 | 9.497014 |
| 3   |            | EFNA1    | 0.585625333  | 8.835912    | 3.23832957  | 0.011120695 | 0.274306764 | -2.968165595 | 17406990     | Efna1       | ENSMUST00000118587 | 8.080307 | 8.332027 | 8.133906 | 8.733769  | 9.075707  | 8.80057   | 9.069963 | 9.509487 | 9.787472 |
| 4   |            | SLC2A1   | 0.3971       | 10.17872211 | 2.922176002 | 0.018202583 | 0.332765229 | -3.463980714 | 17417844     | Slc2a1      | NM_011400          | 9.613961 | 9.576377 | 9.252981 | 10.23831  | 10.29117  | 10.45746  | 10.552   | 10.68579 | 10.94045 |
| 5   |            | EGLN3    | 0.589768667  | 8.905906444 | 2.773160599 | 0.023028941 | 0.367987812 | -3.698696488 | 17281084     | Egln3       | NM_028133          | 6.31747  | 6.476155 | 6.248619 | 9.678622  | 9.700932  | 10.29125  | 10.22735 | 10.32677 | 10.88599 |
| 6   |            | CITED2   | 0.154626667  | 11.24151444 | 2.170528741 | 0.06010259  | 0.554647477 | -4.636799773 | 17231784     | Cited2      | NM_010828          | 11.92937 | 11.99363 | 12.05919 | 10.77278  | 10.82703  | 10.76397  | 10.93952 | 10.90596 | 10.98218 |
| 7   |            | BHLHE40  | 0.308246     | 8.804370889 | 2.047029056 | 0.073102134 | 0.586841827 | -4.823054771 | 17461414     | Bhlhe40     | NM_011498          | 6.98495  | 6.487826 | 6.593832 | 9.663809  | 9.813726  | 9.646461  | 9.788114 | 10.17424 | 10.08638 |
| 8   |            | EP300    | 0.156115333  | 9.381329556 | 2.042297771 | 0.073650949 | 0.587855425 | -4.830124003 | 17313284     | Ep300       | NM_177821          | 9.350973 | 9.234792 | 9.211491 | 9.36978   | 9.379844  | 9.333558  | 9.601069 | 9.490597 | 9.459862 |
| 9   |            | ARNT     | 0.105656667  | 8.798946111 | 1.507595987 | 0.168225161 | 0.741798874 | -5.583769809 | 17400339     | Arnt        | NM_001037737       | 8.906702 | 8.87499  | 8.929449 | 8.691766  | 8.7296    | 8.659836  | 8.735192 | 8.858842 | 8.804138 |
| 10  |            | TCEB2    | -0.179626667 | 10.79320222 | -1.12002272 | 0.293634024 | 0.837868483 | -6.046573733 | 17341625     | Tceb2       | NM_026305          | 10.40663 | 10.51915 | 10.61234 | 10.7371   | 10.91564  | 11.41705  | 10.79032 | 10.85611 | 10.88448 |
| 11  |            | EGLN1    | 0.10057      | 8.360554667 | 1.042078131 | 0.326371148 | 0.849424457 | -6.127917558 | 17514135     | Egln1       | NM_053207          | 8.549711 | 8.430559 | 8.33553  | 8.185415  | 8.217445  | 8.410881  | 8.303596 | 8.466919 | 8.344936 |
| 12  |            | SERPINE1 | 0.18543      | 5.820801    | 1.001116055 | 0.344670907 | 0.861763668 | -6.16886182  | 17453819     | Serpine1    | NM_008871          | 4.456465 | 4.137804 | 4.67707  | 6.527814  | 6.429294  | 6.322682  | 6.496007 | 6.981986 | 6.358087 |

| CHIARADONNA NEOPLASTIC TRANSFORMATION KRAS CDC25 PROBE |         |          |           |           |            |           |          |          |          |           |           |         |         |           |           |           |         |         |         |         |  |  |  |  |  |  |
|--------------------------------------------------------|---------|----------|-----------|-----------|------------|-----------|----------|----------|----------|-----------|-----------|---------|---------|-----------|-----------|-----------|---------|---------|---------|---------|--|--|--|--|--|--|
| ID                                                     | chr     | logFC    | AveExpr   | t         | P.Value    | adj.P.Val | B        | mRNA.Acc | mRNA.Soi | mRna...De | Wt.1      | Wt.2    | Wt.3    | Pten.KO.1 | Pten.KO.2 | Pten.KO.3 | dKO.1   | dKO.2   | dKO.3   |         |  |  |  |  |  |  |
| 1                                                      | CRABP1  | 17517416 | 2.5420413 | 4.3553874 | 8.25336534 | 1.15E-06  | 0.000276 | 5.871527 | ENSMUSTI | ENSEMBL   | cdna:know | 3.65863 | 3.73174 | 3.61996   | 4.40625   | 5.0784    | 4.4497  | 6.71926 | 6.64146 | 8.19976 |  |  |  |  |  |  |
| 2                                                      | SEMASA  | 17310837 | 0.5407013 | 5.8647699 | 3.69188473 | 0.0025209 | 0.084303 | -1.79815 | NM_0091  | RefSeq    | Mus musc  | 7.57716 | 7.43674 | 7.16479   | 7.13969   | 7.28459   | 7.26493 | 7.54522 | 8.18795 | 7.57815 |  |  |  |  |  |  |
| 3                                                      | SEMA7A  | 17517812 | 0.5715987 | 6.2815028 | 3.33803894 | 0.0050443 | 0.123549 | -2.48102 | NM_0113  | RefSeq    | Mus musc  | 5.7126  | 5.30699 | 5.8984    | 6.1385    | 5.88672   | 6.48146 | 6.61163 | 6.64462 | 6.96522 |  |  |  |  |  |  |
| 4                                                      | GADD45A | 17467316 | 0.2262703 | 7.1182321 | 2.3309984  | 0.0356777 | 0.356661 | -4.35793 | NM_0078  | RefSeq    | Mus musc  | 6.97325 | 6.99582 | 6.89784   | 7.18623   | 7.42938   | 7.29388 | 7.44608 | 7.52031 | 7.62192 |  |  |  |  |  |  |
| 5                                                      | CDKN1A  | 17335467 | 0.2906077 | 9.6482605 | 2.24728064 | 0.0417555 | 0.383181 | -4.50387 | NM_0076  | RefSeq    | Mus musc  | 7.50286 | 7.19335 | 6.84908   | 9.84537   | 9.96087   | 9.91228 | 10.2617 | 10.181  | 10.1477 |  |  |  |  |  |  |
| 6                                                      | PLP2    | 17539879 | 0.1462707 | 9.4356947 | 1.86169907 | 0.0843617 | 0.510302 | -5.14127 | ENSMUSTI | ENSEMBL   | cdna:know | 9.26181 | 9.19521 | 9.20807   | 9.2201    | 9.11814   | 9.17587 | 9.30079 | 9.39508 | 9.25705 |  |  |  |  |  |  |
| 7                                                      | ACOT7   | 17422117 | 0.307947  | 7.3743603 | 1.84895887 | 0.086284  | 0.513501 | -5.1612  | NM_0011  | RefSeq    | Mus musc  | 6.0739  | 5.8336  | 5.56812   | 5.92162   | 6.51954   | 6.21132 | 6.706   | 6.19149 | 6.67883 |  |  |  |  |  |  |

| REACTOME | MUSCLE | CONTRACTIC | Gene   | logFC     | AveExpr   | t          | P.Value    | adj.P.Val | B         | Probe.Set. | Gene.Sym | mRNA.Acc | Wt.1     | Wt.2     | Wt.3     | Pten.KO.1 | Pten.KO.2 | Pten.KO.3 | dKO.1    | dKO.2    | dKO.3    |
|----------|--------|------------|--------|-----------|-----------|------------|------------|-----------|-----------|------------|----------|----------|----------|----------|----------|-----------|-----------|-----------|----------|----------|----------|
| 1        |        |            | ITGA1  | -0.44611  | 7.615353  | -2.2636395 | 0.05182574 | 0.5283433 | -4.494458 | 17296388   | Itga1    | NM_0010: | 8.307045 | 8.055531 | 8.131681 | 7.390342  | 7.628489  | 7.672294  | 7.185566 | 7.504245 | 6.662984 |
| 2        |        |            | ACTA2  | -0.392793 | 11.513173 | -3.0226199 | 0.01554906 | 0.3112496 | -3.30598  | 17364098   | Acta2    | NM_0073: | 11.98239 | 12.16661 | 12.10304 | 11.32126  | 11.39917  | 11.55202  | 11.16498 | 11.17786 | 10.75123 |
| 3        |        |            | TPM2   | -0.466374 | 6.6493932 | -2.6926292 | 0.02616542 | 0.3939539 | -3.825491 | 17424656   | Tpm2     | NM_0094: | 8.476751 | 8.782641 | 8.960798 | 6.093129  | 5.735249  | 5.683358  | 5.592258 | 5.393435 | 5.12692  |
| 4        |        |            | MYL9   | -0.591573 | 9.8760587 | -4.7714074 | 0.00121996 | 0.0808198 | -0.71208  | 17378663   | Myf9     | ENSMUSTI | 10.77979 | 11.16015 | 10.77555 | 9.533873  | 9.637148  | 8.800857  | 9.136348 | 9.065428 | 8.995384 |
| 5        |        |            | ACTG2  | -0.847211 | 9.1131799 | -4.5317123 | 0.00168577 | 0.1018758 | -1.043311 | 17468183   | Actg2    | NM_0096: | 10.37548 | 10.71462 | 10.79991 | 8.743279  | 8.614347  | 8.977495  | 8.313345 | 7.780726 | 7.699417 |
| 6        |        |            | LMOD1  | -0.582039 | 5.8639171 | -4.1650651 | 0.00281008 | 0.1371715 | -1.566675 | 17217596   | Lmod1    | NM_0531: | 7.206997 | 7.280172 | 7.202933 | 5.516972  | 5.311878  | 5.586785  | 4.909375 | 4.605275 | 5.154867 |
| 7        |        |            | SORBS1 | -0.575952 | 6.9892017 | -4.0637605 | 0.0032474  | 0.1495955 | -1.71471  | 17364484   | Sorbs1   | NM_1783: | 8.491777 | 8.451153 | 8.553742 | 6.553122  | 6.413074  | 6.600804  | 6.279449 | 5.858874 | 5.70082  |
| 8        |        |            | DES    | -1.102298 | 9.8265696 | -4.9928484 | 0.00091163 | 0.0690144 | -0.413924 | 17214476   | Des      | ENSMUSTI | 10.84681 | 10.999   | 10.7717  | 9.88193   | 9.729422  | 9.952903  | 9.302576 | 8.648147 | 8.306638 |
| 9        |        |            | TNNC2  | -0.828129 | 5.4392339 | -5.3162759 | 0.00060327 | 0.0534563 | 0.007937  | 17394267   | Tnnc2    | NM_0093: | 7.284827 | 7.111852 | 6.754188 | 4.954327  | 5.306199  | 4.882786  | 4.152534 | 4.259227 | 4.247165 |
| 10       |        |            | MYLK   | -0.956831 | 7.1809343 | -6.9289922 | 9.47E-05   | 0.0162112 | 1.8799242 | 17325159   | Mylk     | NM_1393: | 9.338707 | 9.307055 | 9.345761 | 6.634431  | 6.488986  | 6.630273  | 5.929534 | 5.616883 | 5.336779 |
| 11       |        |            | MYH11  | -1.411072 | 9.5725729 | -11.030892 | 2.71E-06   | 0.0018838 | 5.2718679 | 17328368   | Myh11    | NM_0136: | 11.44226 | 11.55934 | 11.4915  | 9.214443  | 9.226761  | 9.505432  | 8.155977 | 7.766625 | 7.790818 |

| TURASHVILI BREAST DUCTAL CARCINOMA vs LOBULAR NORMAL GEM | logFC       | AvsExp      | P            | P.Value     | adj.P.Val   | B            | Probe Set ID | Gem Symbol | mRNA Expression    | WT1      | WT2      | WT3      | Pen KD01 | Pen KD2  | Pen KD3  | dk0.1    | dk0.2    | dk0.3    |
|----------------------------------------------------------|-------------|-------------|--------------|-------------|-------------|--------------|--------------|------------|--------------------|----------|----------|----------|----------|----------|----------|----------|----------|----------|
| 1 KRT5                                                   | -0.44822667 | 5.53426111  | -1.33446181  | -0.12014163 | 0.78666065  | -5.801502828 | 17321966     | krt5       | ENSMUT0011020711   | 8.375105 | 8.009079 | 8.420021 | 8.939005 | 8.824033 | 8.884301 | 7.577272 | 8.925779 | 8.93458  |
| 2 RCAN1                                                  | -0.09910868 | 7.18800343  | -1.14291397  | 0.28453095  | 0.82897705  | -6.021860188 | 17332228     | Rcan1      | ENSMUT0011019466   | 7.265176 | 7.448881 | 7.255262 | 7.163761 | 7.135441 | 7.209921 | 7.158171 | 7.045447 | 6.999199 |
| 3 MMP1                                                   | -0.14286667 | 1.12185444  | -1.88665396  | 0.04082238  | 0.6386599   | -5.05946494  | 17514592     | Mmp1       | ENSMUT00100018761  | 12.19973 | 12.26822 | 12.1048  | 12.12779 | 12.13473 | 12.5999  | 12.076   | 12.04553 | 11.99627 |
| 4 CRYAB                                                  | -0.42118333 | 7.43650808  | -1.16033176  | -0.13405406 | 0.29160661  | -5.19377894  | 17612313     | Cryab      | ENSMUT0010009964   | 7.889122 | 7.47648  | 7.22827  | 7.67469  | 7.654053 | 7.812544 | 7.831788 | 7.559717 | 7.096222 |
| 5 TAGLN                                                  | -0.281196   | 9.83255656  | -0.05232593  | 0.0710001   | 0.5839195   | -4.0839251   | 17612313     | Tagln      | ENSMUT0010009964   | 9.832556 | 9.832556 | 9.832556 | 9.832556 | 9.832556 | 9.832556 | 9.832556 | 9.832556 | 9.832556 |
| 6 CRTA                                                   | -0.52530066 | 1.91470289  | -1.88565813  | 0.09830183  | 0.13483699  | -3.10017405  | 17629391     | Crt14      | ENSMUT0010009958   | 7.54326  | 7.82644  | 6.76648  | 6.87145  | 8.08664  | 7.875334 | 7.231732 | 7.521905 | 8.08664  |
| 7 CAV1                                                   | -0.53883666 | 6.65421121  | -3.92185466  | 0.03986601  | 0.11717737  | -1.92445394  | 17456161     | Cav1       | ENSMUT001000115451 | 7.196031 | 7.329585 | 7.334081 | 6.302217 | 6.671176 | 6.488971 | 6.60698  | 6.170165 | 5.96985  |
| 8 GABRP                                                  | -0.73576067 | 0.90316122  | -2.06604826  | 0.07093567  | 0.58100656  | -6.47945852  | 17621608     | Gabrp      | ENSMUT0011014607   | 8.48055  | 8.24313  | 8.50841  | 1.193179 | 11.2867  | 11.0481  | 9.784758 | 10.99784 | 11.06685 |
| 9 PDZK1                                                  | -0.81104667 | 7.30524233  | -3.03601163  | 0.01512803  | 0.30846563  | -3.28401404  | 17400732     | Pdzk1      | ENSMUT00100010707  | 8.759397 | 8.88651  | 8.892705 | 8.6304   | 6.92673  | 6.55466  | 6.22975  | 6.028905 | 6.513732 |
| 10 ACT2                                                  | -0.39279333 | 1.15317133  | -3.02191985  | 0.015549056 | 0.13124959  | -5.30980464  | 17400738     | Act2       | ENSMUT0010007892   | 11.98239 | 12.88822 | 12.10204 | 13.1216  | 11.9917  | 15.0522  | 11.64798 | 11.1776  | 10.76135 |
| 11 ACTG1                                                 | -0.84711    | 9.13137989  | -4.53112252  | 0.00168772  | 0.10316772  | -4.031347    | 17400738     | Actg1      | ENSMUT0010007892   | 9.131347 | 9.131347 | 9.131347 | 9.131347 | 9.131347 | 9.131347 | 9.131347 | 9.131347 | 9.131347 |
| 12 SYNM                                                  | -0.86857333 | 5.75277893  | -3.495918047 | 0.001860606 | 0.07744951  | -5.03900925  | 17492018     | Synm       | ENSMUT0010002139   | 8.08681  | 8.975559 | 9.049914 | 7.119669 | 7.056823 | 7.512323 | 6.710699 | 6.473208 | 6.436724 |
| 13 ID4                                                   | -0.89671333 | 7.60370189  | -4.91877526  | 0.00091784  | 0.06901442  | -4.015214777 | 17278081     | Id4        | ENSMUT0010001166   | 7.220504 | 6.778333 | 6.553724 | 5.487173 | 5.59176  | 5.21376  | 4.632365 | 4.447316 | 4.437674 |
| 14 SORBS1                                                | -0.57595233 | 6.98920167  | -0.06370494  | 0.03247407  | 0.14959511  | -3.714710041 | 17364484     | Sorbs1     | ENSMUT00100017832  | 8.94777  | 8.451153 | 8.553724 | 6.553212 | 6.41306  | 6.60808  | 6.47949  | 5.858874 | 5.708879 |
| 15 MYLK                                                  | -0.95681333 | 1.80943343  | -2.69922026  | 9.47e-05    | 0.019591121 | -1.87992419  | 17251519     | Myk        | ENSMUT00100019300  | 3.881707 | 3.907055 | 9.345761 | 6.63441  | 6.48896  | 6.63027  | 5.92934  | 5.61683  | 5.308724 |
| 16 SNO2P                                                 | -0.76202633 | 6.53271222  | -4.14965555  | 0.00023272  | 0.10609222  | -4.09091222  | 17251519     | Sno2p      | ENSMUT00100019300  | 6.532712 | 6.532712 | 6.532712 | 6.532712 | 6.532712 | 6.532712 | 6.532712 | 6.532712 | 6.532712 |
| 17 CNN1                                                  | -1.29571667 | 10.10675922 | -3.7122221   | 0.00019184  | 0.02556491  | -1.22642789  | 17514502     | Cnn1       | ENSMUT001000001381 | 11.6144  | 11.5993  | 11.6108  | 9.6823   | 9.2899   | 10.4902  | 9.29573  | 8.97103  | 8.56748  |
| 18 MYH11                                                 | -1.411072   | 9.57527289  | -1.1038919   | 2.71E-06    | 0.001883808 | -1.28678794  | 17283836     | Myh11      | ENSMUT0010001367   | 11.44226 | 11.5594  | 11.4515  | 9.214443 | 9.226761 | 9.50543  | 8.77657  | 7.66625  | 7.70098  |

| REACTOME | SMOOTH MUSCLE CONTRACTI | Gene         | logFC       | AveExpr      | t           | P.Value     | adj.P.Val    | B        | Probe.Set.I.C | Gene.Symbo         | mRNA.Accession | Wt.1     | Wt.2     | Wt.3     | Pten.KO.1 | Pten.KO.2 | Pten.KO.3 | dKO.1    | dKO.2    | dKO.3 |  |
|----------|-------------------------|--------------|-------------|--------------|-------------|-------------|--------------|----------|---------------|--------------------|----------------|----------|----------|----------|-----------|-----------|-----------|----------|----------|-------|--|
| 1        | ITGA1                   | -0.44611     | 7.615353    | -2.263639521 | 0.051825736 | 0.528343255 | -4.494458275 | 17296388 | Itga1         | NM_001033228       | 8.307045       | 8.055531 | 8.131681 | 7.390342 | 7.628489  | 7.672294  | 7.185566  | 7.504245 | 6.662984 |       |  |
| 2        | ACTA2                   | -0.392793333 | 11.51317333 | -3.022619885 | 0.015549056 | 0.311249596 | -3.305980464 | 17364098 | Acta2         | NM_007392          | 11.98239       | 12.16661 | 12.10304 | 11.32126 | 11.39917  | 11.55202  | 11.16498  | 11.17786 | 10.75123 |       |  |
| 3        | TPM2                    | -0.466374333 | 6.649393222 | -2.692629189 | 0.026165424 | 0.393953874 | -3.825491487 | 17424656 | Tpm2          | NM_009416          | 8.476751       | 8.782641 | 8.960798 | 6.093129 | 5.735249  | 5.683358  | 5.592258  | 5.393435 | 5.12692  |       |  |
| 4        | MYL9                    | -0.591572667 | 9.876058667 | -4.771407389 | 0.00121996  | 0.080819825 | -0.712079703 | 17378663 | Myf9          | ENSMUST00000088552 | 10.77979       | 11.16015 | 10.77555 | 9.533873 | 9.637148  | 9.800857  | 9.136348  | 9.065428 | 8.995384 |       |  |
| 5        | ACTG2                   | -0.847211    | 9.113179889 | -4.531712252 | 0.001685772 | 0.101875785 | -1.043310976 | 17468183 | Actg2         | NM_009610          | 10.37548       | 10.71462 | 10.79991 | 8.743279 | 8.614347  | 8.977495  | 8.313345  | 7.780726 | 7.699417 |       |  |
| 6        | LMOD1                   | -0.582039333 | 5.863917111 | -4.165065097 | 0.002810082 | 0.137171462 | -1.566674623 | 17217596 | Lmod1         | NM_053106          | 7.206997       | 7.280172 | 7.202933 | 5.516972 | 5.311878  | 5.586785  | 4.909375  | 4.605275 | 5.154867 |       |  |
| 7        | SORBS1                  | -0.575952333 | 6.989201667 | -4.063760494 | 0.003247401 | 0.149595517 | -1.714710041 | 17364484 | Sorbs1        | NM_178362          | 8.491777       | 8.451153 | 8.553742 | 6.553122 | 6.413074  | 6.600804  | 6.279449  | 5.858874 | 5.70082  |       |  |
| 8        | MYLK                    | -0.956831333 | 7.180934333 | -6.928992226 | 9.47E-05    | 0.016211201 | 1.879924198  | 17325159 | Mylk          | NM_139300          | 9.338707       | 9.307055 | 9.345761 | 6.634431 | 6.488986  | 6.630273  | 5.929534  | 5.616883 | 5.336779 |       |  |
| 9        | MYH11                   | -1.411072    | 9.572572889 | -11.0308919  | 2.71E-06    | 0.001883808 | 5.271867894  | 17328368 | Myh11         | NM_013607          | 11.44226       | 11.55934 | 11.4915  | 9.214443 | 9.226761  | 9.505432  | 8.155977  | 7.766625 | 7.790818 |       |  |

| RNASWAMY | METASTASIS | D Gene | logFC        | AveExpr      | P.Value      | adj.P.Val   | B           | Probe.Set    | IC       | Gene.Symb | mRNA-Accession      | W19.T2    | W1.T2    | W3.T3    | Pten.KO.1 | Pten.KO.2 | Pten.KO.3 | dKO.1    | dKO.2    |
|----------|------------|--------|--------------|--------------|--------------|-------------|-------------|--------------|----------|-----------|---------------------|-----------|----------|----------|-----------|-----------|-----------|----------|----------|
| 1        | REL        |        | 0.29499      | 7.3815633633 | -1.591786759 | 0.148216023 | 0.718788382 | 5.474212856  | 17261107 | REL       | ENSMUST000000102864 | 6.199728  | 8.772448 | 5.356571 | 8.27816   | 8.02665   | 8.435685  | 8.04876  | 8.003067 |
| 2        | CPM        |        | -0.25128933  | 7.381563364  | -1.76621593  | 0.08725609  | -0.54216609 | -0.9722337   | 17261107 | REL       | ENSMUST000000102864 | 6.199728  | 8.772448 | 5.356571 | 8.27816   | 8.02665   | 8.435685  | 8.04876  | 8.003067 |
| 3        | AGRN       |        | 0.17696362   | 8.9639077    | 1.746415094  | 0.09425462  | 0.64244898  | 0.9049923    | 17333387 | AGRN      | ENSMUST000000105574 | 8.370932  | 8.517248 | 8.53659  | 9.30357   | 8.26021   | 9.232246  | 9.1860   | 8.99821  |
| 4        | NRA41      |        | -0.33070333  | 8.07045556   | -2.13337619  | 0.06375615  | 0.56905154  | -4.69316756  | 17415118 | Nra41     | NM_010444           | 9.221613  | 8.95742  | 8.88616  | 7.799012  | 7.435999  | 8.08545   | 7.407852 | 7.47107  |
| 5        | ACTG2      |        | 0.847211     | 9.131179889  | 4.531712252  | 0.001685772 | 1.01875785  | -1.043310976 | 17668183 | Actg2     | NM_009610           | 10.37548  | 10.71462 | 10.99616 | 9.743279  | 8.613447  | 8.977495  | 8.313345 | 7.780726 |
| 6        | PYRL1      |        | -0.832596667 | 5.700979111  | -4.982903408 | 0.000923498 | 0.06944705  | -0.42175055  | 17252533 | Pyr1      | ENSMUST000000021141 | 7.845399  | 7.953204 | 7.682615 | 4.958323  | 4.916621  | 5.282319  | 4.527832 | 4.021084 |
| 7        | MXK1       |        | -0.95683133  | 7.180934333  | -6.92899226  | 9.47E-05    | 0.016211201 | 1.879924198  | 17325159 | MXK1      | NM_139390           | 9.338707  | 9.307055 | 9.347651 | 6.634431  | 6.488986  | 9.232673  | 9.259354 | 5.618883 |
| 8        | CNN1       |        | -1.296571667 | 10.10657922  | -1.633712221 | 0.000181924 | 0.025664919 | 1.224622978  | 17251462 | Cnn1      | ENSMUST000000001384 | 11.611414 | 11.59904 | 11.68108 | 9.66823   | 9.832629  | 10.43092  | 9.027983 | 8.457768 |
| 9        | MYH11      |        | -1.411072    | 9.575272889  | -1.03029119  | 2.71E-06    | 0.001883808 | 5.271867894  | 17315836 | Myh11     | NM_013607           | 11.44226  | 11.55943 | 11.68108 | 9.214443  | 9.236167  | 9.505432  | 8.155977 | 7.766625 |
| 10       | Car1       |        | -1.42095333  | 7.315670778  | -8.32281661  | 2.42E-05    | 0.006474038 | 3.222327852  | 17518780 | Car1      | NM_178396           | 5.634526  | 5.700706 | 5.783903 | 8.8278    | 8.172794  | 9.7530059 | 7.168994 | 7.512478 |
| 11       | RNASE1     |        | -1.75283133  | 8.84161556   | -2.014293981 | 1.41E-08    | 5.56E-05    | 0.302093871  | 17306098 | Rnase1    | NM_011271           | 11.42061  | 11.30871 | 11.43518 | 8.343376  | 8.4486    | 8.512773  | 6.687907 | 6.177857 |

| RICKMAN HEAD AND NECK CANCER |        |              |             |              |             |             |              |          |        | Gene                | logFC    | AveExpr  | t        | P.Value  | adj.P.Val | B        | Probe.Set.ID | Gene.Symbol | mRNA.Accession | Wt.1 | Wt.2 | Wt.3 | Pten.KO.1 | Pten.KO.2 | Pten.KO.3 | dKO.1 | dKO.2 | dKO.3 |
|------------------------------|--------|--------------|-------------|--------------|-------------|-------------|--------------|----------|--------|---------------------|----------|----------|----------|----------|-----------|----------|--------------|-------------|----------------|------|------|------|-----------|-----------|-----------|-------|-------|-------|
| 1                            | ENO3   | -0.390850333 | 6.456151    | -2.274411713 | 0.050943905 | 0.522663425 | -4.477899604 | 17252183 | Eno3   | ENSMUST00000108541  | 6.984496 | 6.932883 | 7.432157 | 6.052928 | 6.33841   | 6.572849 | 5.918791     | 6.07053     | 5.802315       |      |      |      |           |           |           |       |       |       |
| 2                            | TPM2   | -0.466374333 | 6.649393222 | -2.692629189 | 0.026165424 | 0.393953874 | -3.825491487 | 17424656 | Tpm2   | NM_009416           | 8.476751 | 8.782641 | 8.960798 | 6.093129 | 5.735249  | 5.683358 | 5.592258     | 5.393435    | 5.12692        |      |      |      |           |           |           |       |       |       |
| 3                            | CKM    | -0.916722667 | 5.512224556 | -4.119297767 | 0.002999292 | 0.140966706 | -1.633375711 | 17474621 | Ckm    | NM_007710           | 6.627669 | 6.68957  | 7.120216 | 5.267879 | 5.56799   | 5.125498 | 4.871843     | 4.156112    | 4.183244       |      |      |      |           |           |           |       |       |       |
| 4                            | DES    | -1.102298    | 9.826569556 | -4.992848433 | 0.000911633 | 0.069014442 | -0.413924056 | 17214476 | Des    | ENSMUST000000027405 | 10.84681 | 10.999   | 10.7717  | 9.88193  | 9.729422  | 9.952903 | 9.302576     | 8.648147    | 8.306638       |      |      |      |           |           |           |       |       |       |
| 5                            | TNNC2  | -0.828128667 | 5.439233889 | -5.316275911 | 0.000603267 | 0.053456331 | 0.007936963  | 17394267 | Tnncc2 | NM_009394           | 7.284827 | 7.111852 | 6.754188 | 4.954327 | 5.306199  | 4.882786 | 4.152534     | 4.259227    | 4.247165       |      |      |      |           |           |           |       |       |       |
| 6                            | ACTA1  | -1.359793667 | 7.149699222 | -9.808964988 | 6.82E-06    | 0.0031633   | 4.426388929  | 17513995 | Acta1  | NM_009606           | 9.90252  | 9.915656 | 9.811798 | 6.428954 | 6.448996  | 6.5204   | 5.307711     | 4.760232    | 5.251026       |      |      |      |           |           |           |       |       |       |
| 7                            | SYNPO2 | -0.762026333 | 6.527277222 | -6.149655587 | 0.0002224   | 0.02891618  | 1.021848823  | 17410031 | Synpo2 | NM_080451           | 8.665092 | 8.58196  | 8.440662 | 5.960871 | 5.90995   | 5.801109 | 5.39077      | 5.023507    | 4.971574       |      |      |      |           |           |           |       |       |       |

| KEGG | VASCULAR | SMOOTH       | MUSCLE      | CONTRACTI    | Gene        | logFC       | AveExpr      | t        | P.Value  | adj.P.Val          | B        | Probe.Set.ID | Gene.Symbol | mRNA.Accession | Wt.1     | Wt.2     | Wt.3     | Pten.KO.1 | Pten.KO.2 | Pten.KO.3 | dKO.1 | dKO.2 | dKO.3 |
|------|----------|--------------|-------------|--------------|-------------|-------------|--------------|----------|----------|--------------------|----------|--------------|-------------|----------------|----------|----------|----------|-----------|-----------|-----------|-------|-------|-------|
| 1    | ITPR1    | -0.111351    | 8.556316222 | -1.106969089 | 0.298928361 | 0.839569902 | -6.060502124 | 17461341 | Itpr1    | NM_010585          | 8.871398 | 8.955879     | 8.98051     | 8.498487       | 8.282738 | 8.485331 | 8.476602 | 8.241218  | 8.214683  |           |       |       |       |
| 2    | MAPK1    | -0.130301667 | 10.16182167 | -1.197437673 | 0.263758631 | 0.822368911 | -5.96154659  | 17323371 | Mapk1    | NM_001038663       | 10.43286 | 10.3166      | 10.2483     | 10.18054       | 10.16883 | 10.0754  | 10.23086 | 9.864363  | 9.938642  |           |       |       |       |
| 3    | RAMP1    | -0.175291    | 5.918367889 | -1.439845118 | 0.186036266 | 0.752577569 | -5.670876219 | 17215697 | Ramp1    | NM_001168392       | 6.377548 | 6.61426      | 6.623888    | 5.862404       | 5.550377 | 5.674963 | 5.477138 | 5.693459  | 5.391274  |           |       |       |       |
| 4    | GNAQ     | -0.128368    | 8.966480889 | -1.423704517 | 0.190516232 | 0.756996448 | -5.691278017 | 17357959 | Gnaq     | NM_008139          | 9.073112 | 8.988106     | 8.95547     | 9.139907       | 8.999561 | 8.893904 | 8.936004 | 8.784831  | 8.927433  |           |       |       |       |
| 5    | CALCL    | -0.30636     | 7.213710222 | -1.300184651 | 0.227998728 | 0.79697594  | -5.84262309  | 17387385 | Calcl    | ENSMUST00000074262 | 7.038882 | 7.168105     | 7.096207    | 7.120304       | 7.261174 | 7.969575 | 6.555758 | 7.544953  | 7.168434  |           |       |       |       |
| 6    | MRV1     | -0.263191667 | 6.001515556 | -1.301671549 | 0.227512646 | 0.79697594  | -5.840853876 | 17495106 | Mrv1     | ENSMUST00000005751 | 6.794954 | 7.311023     | 7.406998    | 5.742084       | 5.550642 | 5.352394 | 5.575346 | 5.293352  | 4.986847  |           |       |       |       |
| 7    | PLCB3    | -0.143445667 | 9.252375444 | -1.636695164 | 0.138445252 | 0.705242424 | -5.411702635 | 17362156 | Plcb3    | NM_008874          | 9.184011 | 9.329558     | 9.320847    | 9.263882       | 9.300567 | 9.369201 | 9.302936 | 9.108747  | 9.09163   |           |       |       |       |
| 8    | NPR2     | -0.269831    | 5.733585444 | -1.650681332 | 0.135524252 | 0.701998677 | -5.392619078 | 17413403 | Npr2     | NM_173788          | 6.236282 | 6.200303     | 6.630949    | 5.407786       | 5.532742 | 5.731586 | 5.502488 | 5.338579  | 5.021554  |           |       |       |       |
| 9    | PPP1CC   | -0.1497      | 10.79706889 | -1.809524455 | 0.106106102 | 0.660468946 | -5.170513903 | 17482307 | Ppp1cc   | NM_013636          | 10.49236 | 10.62337     | 10.73681    | 10.97299       | 10.9882  | 10.9239  | 10.76147 | 10.83606  | 10.83846  |           |       |       |       |
| 10   | PLA2G12A | -0.235017667 | 7.631196444 | -1.9257199   | 0.088497095 | 0.624873345 | -5.0025312   | 17402588 | Pla2g12a | NM_023196          | 9.151339 | 8.714925     | 8.882017    | 7.110843       | 6.973706 | 7.234221 | 6.81389  | 6.930073  | 6.869754  |           |       |       |       |
| 11   | CACNA1C  | -0.251471    | 5.538528556 | -2.593420324 | 0.030635788 | 0.427073734 | -3.981424496 | 17470235 | Cacna1c  | NM_009781          | 6.747119 | 7.018051     | 6.97763     | 4.966079       | 4.951277 | 5.011829 | 4.693575 | 4.845805  | 4.635392  |           |       |       |       |
| 12   | ITPR2    | -0.205072333 | 8.289866444 | -1.871505124 | 0.096337887 | 0.641686409 | -5.08143066  | 17472777 | Itpr2    | ENSMUST00000053278 | 8.143931 | 8.191598     | 7.935346    | 8.583352       | 8.540336 | 8.352882 | 8.40718  | 8.305886  | 8.148287  |           |       |       |       |
| 13   | PPP1R12A | -0.169903    | 8.787351    | -2.46420515  | 0.0376403   | 0.462047466 | -4.183692548 | 17237142 | Ppp1r12a | NM_027892          | 9.652213 | 9.706762     | 9.669233    | 8.436107       | 8.411968 | 8.435605 | 8.294915 | 8.186863  | 8.292493  |           |       |       |       |
| 14   | ACTA2    | -0.392793233 | 11.51317333 | -3.022619885 | 0.015549056 | 0.311249596 | -3.305980464 | 17364098 | Acta2    | NM_007392          | 11.98239 | 12.16661     | 12.10304    | 11.32126       | 11.39917 | 11.55202 | 11.16498 | 11.17786  | 10.75123  |           |       |       |       |
| 15   | ADCY7    | -0.480160667 | 5.736672667 | -2.196291313 | 0.057690561 | 0.545609164 | -4.597564606 | 17503616 | Adcy7    | NM_007406          | 5.615927 | 5.324772     | 5.381617    | 6.332037       | 6.031849 | 6.010224 | 5.517015 | 6.164641  | 5.251972  |           |       |       |       |
| 16   | PRKCH    | -0.287072333 | 8.141830333 | -3.554166554 | 0.006871156 | 0.222170492 | -2.479752123 | 17276302 | Prkch    | ENSMUST00000021527 | 7.975442 | 7.771153     | 7.818579    | 8.450878       | 8.358771 | 8.476609 | 8.172233 | 8.122158  | 8.13065   |           |       |       |       |
| 17   | MYL9     | -0.591572667 | 9.876058667 | -4.771407389 | 0.00121996  | 0.080819825 | -0.712079703 | 17378663 | Myl9     | ENSMUST00000088551 | 10.77979 | 11.16015     | 10.77555    | 9.533873       | 9.637148 | 9.800857 | 9.136348 | 9.065428  | 8.995384  |           |       |       |       |
| 18   | KCNMB1   | -0.483854333 | 6.473742222 | -3.363918894 | 0.009169964 | 0.253740256 | -2.772900084 | 17248374 | Kcnmb1   | NM_031169          | 6.613663 | 6.422387     | 6.832669    | 6.608074       | 6.688419 | 6.626769 | 6.253236 | 6.34292   | 5.875543  |           |       |       |       |
| 19   | ADCY5    | -0.622959333 | 5.947469    | -3.347054304 | 0.009409579 | 0.253740256 | -2.799047385 | 17325206 | Adcy5    | ENSMUST00000114911 | 7.453503 | 7.789306     | 7.858068    | 5.53732        | 5.179168 | 5.431123 | 5.043941 | 4.38893   | 4.458862  |           |       |       |       |
| 20   | ACTG2    | -0.847211    | 9.113179889 | -4.531712252 | 0.001685772 | 0.101875785 | -1.043310976 | 17468183 | Actg2    | NM_009610          | 10.37548 | 10.71462     | 10.79991    | 8.743279       | 8.614347 | 8.977495 | 8.313345 | 7.780726  | 7.699417  |           |       |       |       |
| 21   | PLA2G6   | -0.352994667 | 6.805613889 | -4.43128948  | 0.001935223 | 0.109991134 | -1.184677701 | 17319168 | Pla2g6   | NM_001199023       | 7.125213 | 7.124485     | 7.009959    | 6.894033       | 6.846968 | 6.781925 | 6.431139 | 6.447545  | 6.585058  |           |       |       |       |
| 22   | MYLK     | -0.956831333 | 7.180934333 | -6.928992226 | 9.47E-05    | 0.016211201 | 1.879924198  | 17325159 | Myhk     | NM_139300          | 9.338707 | 9.307055     | 9.345761    | 6.634431       | 6.488986 | 6.630273 | 5.929534 | 5.616883  | 5.336779  |           |       |       |       |
| 23   | MYH11    | -1.411072    | 9.572572889 | -11.0308919  | 2.71E-06    | 0.001883808 | 5.271867894  | 17328368 | Myh11    | NM_013607          | 11.44226 | 11.55934     | 11.4915     | 9.214443       | 9.226761 | 9.505432 | 8.155977 | 7.766625  | 7.790818  |           |       |       |       |

| KUNINGER | IGF1    | VS           | PDGFB       | TARGETS      | L            | Gene        | logFC        | AveExpr  | t       | P.Value      | adj.P.Val | B        | Probe.Set.ID | Gene.Symbol | mRNA.Accession | Wt.1     | Wt.2     | Wt.3     | Pten.KO.1 | Pten.KO.2 | Pten.KO.3 | dKO.1 | dKO.2 | dKO.3 |
|----------|---------|--------------|-------------|--------------|--------------|-------------|--------------|----------|---------|--------------|-----------|----------|--------------|-------------|----------------|----------|----------|----------|-----------|-----------|-----------|-------|-------|-------|
| 1        | TMEM38A | -0.270941    | 6.843866222 | -1.72602307  | 0.120738809  | 0.684092409 | -5.288455601 | 17502462 | Tmem38a | NM_144534    | 8.588431  | 8.435947 | 8.618191     | 5.9894      | 6.200455       | 6.19267  | 5.83572  | 5.541126 | 6.192856  |           |           |       |       |       |
| 2        | SMTN    | -0.195364333 | 8.141194667 | -1.6741994   | 0.130739356  | 0.693309321 | -5.360347215 | 17259831 | Smtn    | NM_001159284 | 8.751651  | 9.008172 | 9.189634     | 7.909454    | 7.78429        | 7.75995  | 7.582076 | 7.574285 | 7.71124   |           |           |       |       |       |
| 3        | GPT2    | -0.222282333 | 9.085490778 | -1.769899823 | 0.1112830434 | 0.671671799 | -5.22679234  | 17503446 | Gpt2    | NM_173866    | 10.63594  | 10.42681 | 10.36287     | 8.561115    | 8.572482       | 8.371725 | 8.46673  | 8.308285 | 8.06346   |           |           |       |       |       |
| 4        | TPM2    | -0.466374333 | 6.649393222 | -2.692629189 | 0.026165424  | 0.393953874 | -3.825491487 | 17424656 | Tpm2    | NM_009416    | 8.476751  | 8.782641 | 8.960798     | 6.093129    | 5.735249       | 5.683358 | 5.592258 | 5.393435 | 5.12692   |           |           |       |       |       |
| 5        | CKM     | -0.916722667 | 5.512224556 | -4.119297767 | 0.002999292  | 0.140966706 | -1.633375711 | 17474621 | Ckm     | NM_007710    | 6.627669  | 6.68957  | 7.120216     | 5.267879    | 5.56799        | 5.125498 | 4.871843 | 4.156112 | 4.183244  |           |           |       |       |       |
| 6        | ATP2B4  | -0.481603    | 7.482516444 | -5.189703622 | 0.000707807  | 0.058266367 | -0.155235229 | 17227037 | Atp2b4  | NM_001167949 | 8.865671  | 8.814573 | 8.897943     | 6.957473    | 7.031377       | 7.115785 | 6.660079 | 6.387733 | 6.612014  |           |           |       |       |       |
| 7        | PIGM    | -0.937909667 | 5.664705667 | -5.251555802 | 0.00065445   | 0.056550954 | -0.075189763 | 17356874 | Pigm    | NM_011224    | 6.975345  | 6.635724 | 6.558105     | 5.88579     | 5.372743       | 5.55492  | 4.919067 | 4.433053 | 4.647604  |           |           |       |       |       |
| 8        | TNNC2   | -0.828128667 | 5.439233889 | -5.316275911 | 0.000603267  | 0.053456331 | 0.007936963  | 17394267 | Tnnc2   | NM_009394    | 7.284827  | 7.111852 | 6.754188     | 4.954327    | 5.306199       | 4.882786 | 4.152534 | 4.259227 | 4.247165  |           |           |       |       |       |
| 9        | ACTA1   | -1.359793667 | 7.149699222 | -9.808964988 | 6.82E-06     | 0.0031633   | 4.426388929  | 17513995 | Acta1   | NM_009606    | 9.90252   | 9.915656 | 9.811798     | 6.428954    | 6.448996       | 6.5204   | 5.307711 | 4.760232 | 5.251026  |           |           |       |       |       |

| KEGG | TYPE    | DIABETES     | MELLITL     | Gene         | logFC       | AveExpr     | t            | P.Value  | adj.P.Val | B                   | Probe.Set.ID | Gene.Symbol | mRNA.Accession | Wt.1     | Wt.2     | Wt.3     | Pten.KO.1 | Pten.KO.2 | Pten.KO.3 | dKO.1 | dKO.2 | dKO.3 |
|------|---------|--------------|-------------|--------------|-------------|-------------|--------------|----------|-----------|---------------------|--------------|-------------|----------------|----------|----------|----------|-----------|-----------|-----------|-------|-------|-------|
| 1    | ICA1    | -0.167719667 | 8.422159667 | -1.300116626 | 0.228020987 | 0.79697594  | -5.842703999 | 17464803 | Ica1      | NM_010492           | 9.204037     | 9.2159      | 8.960773       | 8.280646 | 7.978206 | 8.202091 | 8.195284  | 7.921828  | 7.840672  |       |       |       |
| 2    | H2-Ab1  | -0.397541667 | 9.600963889 | -1.697521947 | 0.126147856 | 0.689956    | -5.328123288 | 17336494 | H2-Ab1    | NM_207105           | 8.852484     | 7.944332    | 8.466284       | 10.49374 | 10.24914 | 10.42622 | 9.895869  | 10.34112  | 9.739486  |       |       |       |
| 3    | H2-DMa  | -0.400974    | 7.212023778 | -1.555822052 | 0.156486187 | 0.726032892 | -5.520386858 | 17336407 | H2-DMa    | ENSMUST000000042121 | 6.502368     | 5.426292    | 6.426316       | 8.083281 | 7.84809  | 7.946709 | 7.614011  | 7.662231  | 7.398916  |       |       |       |
| 4    | H2-Aa   | -0.361935    | 9.180130111 | -1.892533977 | 0.093221359 | 0.63792248  | -5.050931079 | 17343813 | H2-Aa     | ENSMUST000000040655 | 8.124038     | 7.37809     | 7.685048       | 10.11246 | 10.02877 | 10.11867 | 9.486132  | 9.985332  | 9.702631  |       |       |       |
| 5    | HSPD1   | -0.192755667 | 8.600675667 | -1.556755336 | 0.156266433 | 0.726032892 | -5.519149415 | 17223228 | Hspd1     | ENSMUST000000027122 | 8.704511     | 8.682066    | 8.341679       | 8.542604 | 8.799344 | 8.786098 | 8.628279  | 8.456742  | 8.464758  |       |       |       |
| 6    | H2-DMb2 | -0.274785    | 5.287129    | -1.760018885 | 0.114568152 | 0.675369546 | -5.240740085 | 17336414 | H2-DMb2   | ENSMUST000000041982 | 4.86824      | 4.212921    | 4.469249       | 5.77047  | 5.695348 | 5.963235 | 5.508492  | 5.554604  | 5.541602  |       |       |       |
| 7    | H2-M3   | -0.394109    | 6.467563667 | -2.906281409 | 0.01866356  | 0.334421218 | -3.489006584 | 17337557 | H2-M3     | NM_013819           | 5.427115     | 5.717899    | 5.99501        | 7.026925 | 6.979019 | 7.119244 | 6.57206   | 6.715559  | 6.655242  |       |       |       |
| 8    | IL1B    | -0.731174667 | 5.762584667 | -2.287165925 | 0.049918998 | 0.520296835 | -4.458271904 | 17391565 | IL1b      | NM_008361           | 4.412048     | 4.106155    | 3.863253       | 7.180279 | 6.367096 | 7.29029  | 5.751155  | 6.087203  | 6.805783  |       |       |       |
| 9    | H2-Eb1  | -0.466555667 | 9.544208556 | -3.372831378 | 0.009045931 | 0.252198368 | -2.759091776 | 17336502 | H2-Eb1    | NM_010382           | 8.488725     | 8.137362    | 8.428997       | 10.34639 | 10.34675 | 10.42809 | 9.796907  | 10.18355  | 9.741106  |       |       |       |
| 10   | FAS     | -0.536993333 | 6.95558     | -4.470749316 | 0.001832757 | 0.106683314 | -1.128948594 | 17358797 | Fas       | NM_007987           | 7.890235     | 8.020988    | 7.853033       | 6.857074 | 6.599895 | 6.766503 | 6.011183  | 6.185916  | 6.415393  |       |       |       |
| 11   | TNF     | -0.887031667 | 7.587099111 | -3.10673978  | 0.013636311 | 0.296106606 | -3.173945232 | 17344309 | Tnf       | NM_013693           | 4.873451     | 4.72835     | 4.36839        | 9.261547 | 9.328099 | 9.897752 | 8.074049  | 8.58418   | 9.168074  |       |       |       |

| MCDOWELL ACUTE LUNG INJURY D | Gene     | logFC        | AveExpr     | t            | P.Value     | adj.P.Val   | B            | Probe.Set.ID | Gene.Symbol | mRNA.Accession      | Wt.1     | Wt.2     | Wt.3     | Pten.KO.1 | Pten.KO.2 | Pten.KO.3 | dKO.1    | dKO.2    | dKO.3    |
|------------------------------|----------|--------------|-------------|--------------|-------------|-------------|--------------|--------------|-------------|---------------------|----------|----------|----------|-----------|-----------|-----------|----------|----------|----------|
| 1                            | ZBP1     | -0.383462667 | 7.503493    | -1.62044931  | 0.141910179 | 0.710163457 | -5.433765636 | 17395079     | Zbp1        | NM_021394           | 4.987208 | 4.032725 | 4.772382 | 9.115515  | 9.394546  | 8.934694  | 8.841161 | 8.586423 | 8.866783 |
| 2                            | Cyp2f2   | -0.197903333 | 11.29233233 | -1.776343253 | 0.111710527 | 0.671349884 | -5.217678138 | 17475498     | Cyp2f2      | ENSMUST0000000310X  | 9.838205 | 9.573998 | 9.550378 | 12.28274  | 12.27315  | 12.07517  | 12.0373  | 12.11598 | 11.88407 |
| 3                            | LLGL2    | -0.148725    | 8.773866889 | -1.468974757 | 0.178184291 | 0.747844798 | -5.633710795 | 17258341     | Llg12       | NM_145438           | 8.76359  | 9.037646 | 8.860131 | 8.931011  | 8.788681  | 8.655113  | 8.638709 | 8.611084 | 8.678837 |
| 4                            | H2-Aa    | -0.361935    | 9.180130111 | -1.892533977 | 0.093221359 | 0.63792248  | -5.050931079 | 17343813     | H2-Aa       | ENSMUST0000004065   | 8.124038 | 7.37809  | 7.685048 | 10.11246  | 10.02877  | 10.11867  | 9.486132 | 9.985332 | 9.702631 |
| 5                            | SLC9A3R2 | -0.157104667 | 9.327007778 | -1.725726563 | 0.120793959 | 0.684092409 | -5.288869875 | 17341963     | Slc9a3r2    | NM_023055           | 9.23563  | 9.278559 | 9.479145 | 9.459823  | 9.361469  | 9.389233  | 9.273621 | 9.317076 | 9.148514 |
| 6                            | ALAS1    | -0.247554333 | 8.836774556 | -1.942683733 | 0.086171137 | 0.618364467 | -4.97766808  | 17530653     | Alas1       | ENSMUST000000141118 | 8.246356 | 7.802145 | 8.107651 | 9.409259  | 9.366136  | 9.283346  | 9.262403 | 9.08243  | 8.971245 |
| 7                            | CDH13    | -0.296315    | 6.696141    | -2.067475144 | 0.070775613 | 0.580279405 | -4.792445651 | 17506042     | Cdh13       | ENSMUST00000011716  | 6.577795 | 6.72067  | 7.114528 | 6.692422  | 6.817761  | 6.86035   | 6.458572 | 6.648311 | 6.374705 |
| 8                            | CD97     | -0.375766333 | 9.120296    | -3.05443793  | 0.005912499 | 0.208390666 | -3.326737829 | 17510948     | CD97        | NM_011925           | 9.666955 | 9.648838 | 9.965106 | 8.903302  | 9.013702  | 9.047528  | 8.68578  | 8.592738 | 8.558715 |
| 9                            | CAV1     | -0.538838667 | 6.654212111 | -3.921856442 | 0.003986601 | 0.171177737 | -1.924445394 | 17456161     | Cav1        | ENSMUST00000011545  | 7.196031 | 7.329585 | 7.334081 | 6.302217  | 6.671176  | 6.848971  | 6.066098 | 6.170165 | 5.969585 |
| 10                           | H2-Eb1   | -0.466555667 | 9.544208556 | -3.372831378 | 0.009045931 | 0.252198368 | -2.759091776 | 17336502     | H2-Eb1      | NM_010382           | 8.488725 | 8.137362 | 8.428997 | 10.34639  | 10.34675  | 10.42809  | 9.796907 | 10.18355 | 9.741106 |
| 11                           | Cyp2b10  | -0.948903667 | 6.662314444 | -2.153250271 | 0.061775377 | 0.561419106 | -4.66304525  | 17475360     | Cyp2b10     | ENSMUST0000007243   | 3.750041 | 5.636372 | 3.903348 | 8.131746  | 8.420416  | 8.206728  | 7.17879  | 7.630155 | 7.103234 |
| 12                           | ABCG1    | -0.456619    | 7.711373    | -2.614306377 | 0.029634221 | 0.419401101 | -3.948631738 | 17335770     | Abcg1       | NM_009593           | 5.568249 | 5.285339 | 5.667772 | 9.193945  | 9.159129  | 8.772353  | 8.863705 | 8.322921 | 8.568944 |
| 13                           | TNFRSF19 | -0.764932667 | 8.032598111 | -6.52682318  | 0.000145784 | 0.022287393 | 1.447514781  | 17307433     | Tnfrsf19    | NM_013869           | 8.234564 | 8.252022 | 7.951871 | 8.5144    | 8.325012  | 8.23545   | 7.623977 | 7.688295 | 7.467792 |



| BERENJENO TRANSFORMED BY RHC |        |           |           |            |            |           |           |          |        | Gene     | logFC    | AveExpr  | t        | P.Value  | adj.P.Val | B        | Probe.Set | Gene.Sym | mRNA.Acc | Wt.1 | Wt.2 | Wt.3 | Pten.KO.1 | Pten.KO.2 | Pten.KO.3 | dKO.1 | dKO.2 | dKO.3 |
|------------------------------|--------|-----------|-----------|------------|------------|-----------|-----------|----------|--------|----------|----------|----------|----------|----------|-----------|----------|-----------|----------|----------|------|------|------|-----------|-----------|-----------|-------|-------|-------|
| 1                            | ERRFI1 | -0.174483 | 9.4359157 | -1.842876  | 0.10073952 | 0.6500409 | -5.122733 | 17421972 | Errfi1 | ENSMUSTI | 8.687006 | 8.706786 | 8.82946  | 9.833893 | 9.804398  | 9.973428 | 9.826434  | 9.563472 | 9.698364 |      |      |      |           |           |           |       |       |       |
| 2                            | ALCAM  | -0.1627   | 10.052482 | -1.3795694 | 0.203249   | 0.7710277 | -5.746347 | 17330918 | Alcam  | ENSMUSTI | 9.626881 | 9.730506 | 9.522974 | 10.50374 | 10.30325  | 10.23305 | 10.36325  | 10.18389 | 10.0048  |      |      |      |           |           |           |       |       |       |
| 3                            | TAGLN  | -0.282196 | 9.8239276 | -2.0522532 | 0.07250074 | 0.5853919 | -4.815243 | 17526576 | Tagln  | NM_0115  | 10.70416 | 10.9606  | 10.70859 | 9.548138 | 9.375656  | 9.520499 | 9.165743  | 9.467412 | 8.96455  |      |      |      |           |           |           |       |       |       |
| 4                            | CBX1   | -0.120204 | 8.403279  | -1.7508531 | 0.11620235 | 0.6776263 | -5.253647 | 17255653 | Cbx1   | NM_0076  | 8.534256 | 8.463743 | 8.545559 | 8.38485  | 8.403648  | 8.434784 | 8.333948  | 8.245929 | 8.282794 |      |      |      |           |           |           |       |       |       |
| 5                            | MYC    | -0.286906 | 8.7067568 | -1.6926236 | 0.1270997  | 0.6903579 | -5.334909 | 17311846 | Myc    | ENSMUSTI | 9.170848 | 8.957321 | 9.343883 | 8.659216 | 8.603911  | 8.611611 | 8.01953   | 8.292889 | 8.701602 |      |      |      |           |           |           |       |       |       |
| 6                            | DUSP6  | -0.34398  | 8.5203474 | -2.229908  | 0.05468573 | 0.5358133 | -4.546193 | 17236882 | Dusp6  | NM_0262  | 7.998037 | 7.835152 | 7.878586 | 8.8381   | 8.91594   | 9.247606 | 8.353517  | 8.766068 | 8.850121 |      |      |      |           |           |           |       |       |       |
| 7                            | LY75   | -0.377917 | 6.3728931 | -3.2086956 | 0.01164148 | 0.2767262 | -3.014412 | 17385574 | Ly75   | NM_0138  | 5.538398 | 5.238556 | 5.195806 | 7.187756 | 7.069702  | 7.001056 | 6.82962   | 6.560544 | 6.7346   |      |      |      |           |           |           |       |       |       |
| 8                            | ACTG2  | -0.847211 | 9.1131799 | -4.5317123 | 0.00168577 | 0.1018758 | -1.043311 | 17468183 | Actg2  | NM_0096  | 10.37548 | 10.71462 | 10.79991 | 8.743279 | 8.614347  | 8.977495 | 8.313345  | 7.780726 | 7.699417 |      |      |      |           |           |           |       |       |       |
| 9                            | SORBS1 | -0.575952 | 6.9892017 | -4.0637605 | 0.0032474  | 0.1495955 | -1.71471  | 17364484 | Sorbs1 | NM_1783  | 8.491777 | 8.451153 | 8.553742 | 6.553122 | 6.413074  | 6.600804 | 6.279449  | 5.858874 | 5.70082  |      |      |      |           |           |           |       |       |       |
| 10                           | ACTA1  | -1.359794 | 7.1496992 | -9.808965  | 6.82E-06   | 0.0031633 | 4.4263889 | 17513995 | Acta1  | NM_0096  | 9.90252  | 9.915656 | 9.811798 | 6.428954 | 6.448996  | 6.5204   | 5.307711  | 4.760232 | 5.251026 |      |      |      |           |           |           |       |       |       |

**Supplementary Table 4: Nomenclature of the common lipid classes**

| <b>Lipid Classes</b>        | <b>Lipid Name</b>                    | <b>Abbreviations</b> |
|-----------------------------|--------------------------------------|----------------------|
| <i>P-Choline</i>            | lysophosphatidylcholine              | LPC                  |
|                             | platelet-activating factor           | PAF                  |
|                             | phosphatidylcholine                  | PC                   |
| <i>P-Ethanol Amine</i>      | lysophosphatidylethanolamine         | LPE                  |
|                             | lysodimethylphosphatidylethanolamine | LdMePE               |
|                             | phosphatidylethanolamine             | PE                   |
|                             | dimethylphosphatidylethanolamine     | dMePE                |
| <i>P-Serine</i>             | lysophosphatidylserine               | LPS                  |
|                             | phosphatidylserine                   | PS                   |
| <i>P-Glycerol</i>           | lysophosphatidylglycerol             | LPG                  |
|                             | phosphatidylglycerol                 | PG                   |
| <i>P-Inositol</i>           | lysophosphatidylinositol             | LPI                  |
|                             | phosphatidylinositol                 | PI                   |
|                             | phosphatidylinositol                 | PIP                  |
|                             | phosphatidylinositol                 | PIP2                 |
|                             | phosphatidylinositol                 | PIP3                 |
| <i>P-Ethanol</i>            | lysophosphatidylethanol              | LPET                 |
|                             | phosphatidylethanol                  | PEt                  |
| <i>P-Acid</i>               | lysophosphatidic acid                | LPA                  |
|                             | phosphatidic acid                    | PA                   |
|                             | cyclic phosphatidic acid             | cPA                  |
| <i>P-Methanol</i>           | lysophosphatidylmethanol             | LPMMe                |
|                             | phosphatidylmethanol                 | PMe                  |
| <i>Sphingolipids</i>        | sphingomyelin                        | SM                   |
|                             | sphingomyelin(phytosphingosine)      | phSM                 |
| <i>Neutral glycerolipid</i> | monoglyceride                        | MG                   |
|                             | diglyceride                          | DG                   |
|                             | triglyceride                         | TG                   |
| <i>Fatty Acid</i>           | fatty acid                           | FA                   |
|                             | (O-acyl)-1-hydroxy fatty acid        | OAHA                 |
| <i>Cardiolipin</i>          | Cardiolipin                          | CL                   |
| <i>Sphingoid base</i>       | Sphingosine                          | So                   |
|                             | Sphingosine phosphate                | SoP                  |
| <i>Glycosphingolipids</i>   | Ceramides                            | Cer                  |
|                             | Ceramides phosphate                  | CerP                 |
|                             | Gangliosides                         | GM3                  |
|                             | Gangliosides                         | GM2                  |
|                             | Gangliosides                         | GM1                  |
|                             | Gangliosides                         | GD1a                 |

|                                   |                                 |            |
|-----------------------------------|---------------------------------|------------|
|                                   | Gangliosides                    | GD1b       |
|                                   | Gangliosides                    | GD2        |
|                                   | Gangliosides                    | GD3        |
|                                   | Gangliosides                    | GT1a       |
|                                   | Gangliosides                    | GT1b       |
|                                   | Gangliosides                    | GT1c       |
|                                   | Gangliosides                    | GT2        |
|                                   | Gangliosides                    | GT3        |
|                                   | Gangliosides                    | GQ1c       |
|                                   | Gangliosides                    | GQ1b       |
| <i>Neutral Glycosphingolipids</i> | Simple Glc series               | CerG1      |
|                                   | Simple Glc series               | CerG2      |
|                                   | Simple Glc series               | CerG3      |
|                                   | Simple Glc series               | CerG2GNAc1 |
|                                   | Simple Glc series               | CerG3GNAc1 |
|                                   | Simple Glc series               | CerG3GNAc2 |
| <i>Steroid</i>                    | Cholesteryl Ester               | ChE        |
|                                   | zymosteryl                      | ZyE        |
|                                   | Stigmasteryl ester              | StE        |
|                                   | Sitosteryl ester                | SiE        |
| <i>Coenzyme</i>                   | Coenzyme                        | Co         |
| <i>Glycoglycerolipid</i>          | Monogalactosylmonoacylglycerol  | MGMG       |
|                                   | Monogalactosyldiacylglycerol    | MGDG       |
|                                   | Digalactosylmonoacylglycerol    | DGMG       |
|                                   | Digalactosyldiacylglycerol      | DGDG       |
|                                   | Sulfoquinovosylmonoacylglycerol | SQMG       |
|                                   | Sulfoquinovosyldiacylglycerol   | SQDG       |









|                      |    |         |        |           |           |           |           |           |           |           |           |           |
|----------------------|----|---------|--------|-----------|-----------|-----------|-----------|-----------|-----------|-----------|-----------|-----------|
| PA(33:0/16:0)+H      | PA | (33:0)  | (16:0) | 5.540E+07 | 6.742E+07 | 1.005E+08 | 7.314E+07 | 4.420E+07 | 2.589E+07 | 2.372E+07 | 1.815E+07 | 3.384E+07 |
| PA(34:6/18:1)+H      | PA | (34:6)  | (18:1) | 1.370E+06 | 1.842E+07 | 7.457E+06 | 4.734E+07 | 5.115E+07 | 1.695E+07 | 5.418E+07 | 6.346E+07 | 2.284E+07 |
| PA(35:6/18:1)+H      | PA | (35:6)  | (18:1) | 2.272E+08 | 2.244E+08 | 1.139E+08 | 3.170E+08 | 2.213E+08 | 2.666E+07 | 1.881E+08 | 8.528E+07 | 3.308E+07 |
| PA(35:6/18:1)+H      | PA | (35:6)  | (18:1) | 1.057E+07 | 6.443E+06 | 1.529E+07 | 2.240E+07 | 1.283E+07 | 2.888E+07 | 4.696E+06 | 6.042E+07 | 2.959E+06 |
| PC(4:0/14:0)+H       | PC | (4:0)   | (14:0) | 5.429E+06 | 4.056E+06 | 3.021E+07 | 1.332E+05 | 3.570E+06 | 4.828E+05 | 0.000E+00 | 4.697E+05 | 3.790E+05 |
| PC(4:0/15:1)+H       | PC | (4:0)   | (15:1) | 1.976E+06 | 0.000E+00 | 6.612E+06 | 5.270E+07 | 9.343E+07 | 8.542E+06 | 0.000E+00 | 2.048E+07 | 4.565E+07 |
| PC(4:0/16:0)+HCOO    | PC | (4:0)   | (16:0) | 3.276E+06 | 6.522E+05 | 1.952E+06 | 7.566E+05 | 1.538E+05 | 0.000E+00 | 0.000E+00 | 0.000E+00 | 0.000E+00 |
| PC(4:0/16:0)+H       | PC | (4:0)   | (16:0) | 4.837E+07 | 1.176E+07 | 3.255E+07 | 1.653E+07 | 4.713E+06 | 4.256E+06 | 0.000E+00 | 3.601E+06 | 3.100E+06 |
| PC(4:0/16:1)+H       | PC | (4:0)   | (16:1) | 5.062E+06 | 1.490E+06 | 1.893E+07 | 6.288E+06 | 1.119E+07 | 2.787E+06 | 1.640E+06 | 1.248E+07 | 9.187E+06 |
| PC(4:0/16:2)+H       | PC | (4:0)   | (16:2) | 2.104E+07 | 4.133E+06 | 4.154E+07 | 7.603E+06 | 1.521E+07 | 4.313E+06 | 5.778E+06 | 6.294E+06 | 8.756E+06 |
| PC(4:0/17:0)+H       | PC | (4:0)   | (17:0) | 9.848E+06 | 1.534E+06 | 7.451E+06 | 7.668E+06 | 1.262E+07 | 1.046E+07 | 0.000E+00 | 6.244E+05 | 9.783E+05 |
| PC(8:0e/13:0)+H      | PC | (8:0e)  | (13:0) | 7.257E+05 | 1.743E+06 | 1.023E+06 | 4.636E+06 | 1.319E+07 | 1.671E+06 | 1.577E+06 | 9.718E+06 | 6.977E+07 |
| PC(8:0p/13:0)+H      | PC | (8:0p)  | (13:0) | 8.251E+06 | 5.962E+06 | 8.769E+06 | 1.771E+07 | 1.371E+07 | 1.010E+07 | 1.114E+07 | 1.214E+07 | 4.158E+07 |
| PC(6:0/16:0)+H       | PC | (6:0)   | (16:0) | 6.847E+07 | 1.409E+07 | 3.971E+07 | 1.197E+08 | 5.263E+07 | 5.720E+07 | 1.167E+04 | 1.546E+07 | 2.460E+07 |
| PC(4:0/18:1)+H       | PC | (4:0)   | (18:1) | 2.929E+06 | 1.130E+05 | 1.411E+06 | 5.445E+06 | 9.064E+05 | 3.222E+06 | 0.000E+00 | 0.000E+00 | 5.912E+05 |
| PC(4:0/18:3)+H       | PC | (4:0)   | (18:3) | 1.405E+06 | 4.972E+05 | 5.803E+06 | 0.000E+00 | 2.759E+05 | 0.000E+00 | 0.000E+00 | 0.000E+00 | 2.680E+03 |
| PC(8:0e/15:0)+H      | PC | (8:0e)  | (15:0) | 7.907E+06 | 6.223E+06 | 9.594E+06 | 1.878E+08 | 1.218E+08 | 2.009E+07 | 1.182E+08 | 2.547E+08 | 5.636E+08 |
| PC(8:0e/15:1)+H      | PC | (8:0e)  | (15:1) | 7.918E+06 | 0.000E+00 | 1.346E+06 | 4.364E+07 | 1.812E+07 | 3.261E+06 | 8.223E+06 | 4.356E+07 | 5.676E+07 |
| PC(16:1/8:0)+H       | PC | (16:1)  | (8:0)  | 9.043E+06 | 2.614E+06 | 2.800E+06 | 9.840E+07 | 3.444E+07 | 3.236E+07 | 0.000E+00 | 5.783E+06 | 1.192E+07 |
| PC(4:0/20:4)+H       | PC | (4:0)   | (20:4) | 1.068E+07 | 1.148E+05 | 2.699E+05 | 1.661E+05 | 0.000E+00 | 0.000E+00 | 0.000E+00 | 0.000E+00 | 0.000E+00 |
| PC(6:0/19:0)+H       | PC | (6:0)   | (19:0) | 0.000E+00 | 0.000E+00 | 0.000E+00 | 1.008E+06 | 7.498E+06 | 2.023E+05 | 0.000E+00 | 1.403E+04 | 0.000E+00 |
| PC(8:0e/17:0)+H      | PC | (8:0e)  | (17:0) | 2.888E+04 | 0.000E+00 | 0.000E+00 | 2.809E+07 | 3.856E+06 | 1.012E+06 | 1.177E+07 | 2.004E+07 | 7.509E+07 |
| PC(8:0e/17:1)+H      | PC | (8:0e)  | (17:1) | 3.326E+03 | 4.026E+05 | 9.941E+05 | 3.023E+07 | 1.609E+06 | 1.197E+06 | 1.114E+07 | 2.681E+07 | 3.966E+07 |
| PC(8:0/18:2)+H       | PC | (8:0)   | (18:2) | 0.000E+00 | 2.607E+03 | 2.829E+05 | 3.841E+07 | 3.773E+06 | 2.057E+06 | 7.067E+03 | 3.522E+06 | 4.582E+06 |
| PC(14:0/14:0)+HCOO   | PC | (14:0)  | (14:0) | 1.214E+06 | 1.052E+06 | 8.067E+06 | 7.682E+06 | 3.412E+06 | 5.710E+06 | 5.726E+06 | 1.332E+07 | 2.708E+07 |
| PC(14:0/14:0)+H      | PC | (14:0)  | (14:0) | 9.735E+07 | 1.026E+08 | 1.465E+08 | 2.423E+08 | 9.087E+07 | 9.773E+07 | 1.175E+08 | 4.832E+08 | 6.127E+08 |
| PC(16:1/12:0)+H      | PC | (16:1)  | (12:0) | 4.327E+05 | 2.094E+03 | 0.000E+00 | 2.370E+07 | 8.589E+06 | 6.885E+06 | 9.421E+05 | 1.160E+07 | 6.165E+06 |
| PC(16:0/13:0)+H      | PC | (16:0)  | (13:0) | 2.960E+08 | 4.249E+08 | 3.867E+08 | 1.944E+08 | 2.759E+08 | 1.528E+08 | 6.950E+07 | 4.867E+08 | 8.414E+08 |
| PC(16:0e/13:0)+H     | PC | (16:0e) | (13:0) | 0.000E+00 | 2.469E+07 | 5.750E+07 |
| PC(16:1/13:0)+H      | PC | (16:1)  | (13:0) | 3.536E+04 | 3.078E+04 | 1.012E+05 | 1.567E+07 | 6.902E+07 | 8.031E+06 | 3.485E+07 | 7.930E+06 | 3.852E+08 |
| PC(16:0/14:0)+HCOO   | PC | (16:0)  | (14:0) | 2.438E+08 | 1.977E+08 | 2.820E+08 | 2.018E+08 | 3.744E+08 | 2.942E+08 | 3.400E+08 | 6.255E+08 | 4.150E+08 |
| PC(16:0/14:0)+H      | PC | (16:0)  | (14:0) | 1.519E+09 | 1.846E+09 | 2.177E+09 | 3.129E+09 | 2.708E+09 | 2.321E+09 | 2.788E+09 | 4.600E+09 | 4.893E+09 |
| PC(16:0e/14:0)+HCOO  | PC | (16:0e) | (14:0) | 1.505E+05 | 6.586E+05 | 0.000E+00 | 4.360E+07 | 2.621E+07 | 6.369E+06 | 2.471E+07 | 8.486E+07 | 1.958E+08 |
| PC(16:0e/14:0)+H     | PC | (16:0e) | (14:0) | 4.332E+07 | 1.507E+07 | 3.766E+07 | 5.877E+08 | 7.211E+07 | 4.728E+08 | 3.476E+08 | 1.840E+09 | 3.655E+09 |
| PC(16:0p/14:0)+HCOO  | PC | (16:0p) | (14:0) | 4.699E+05 | 6.269E+05 | 5.137E+05 | 1.674E+07 | 3.983E+06 | 1.741E+06 | 1.206E+07 | 1.967E+07 | 1.307E+07 |
| PC(16:1/14:0)+HCOO   | PC | (16:1)  | (14:0) | 6.740E+06 | 1.832E+07 | 8.086E+06 | 6.910E+07 | 5.976E+07 | 3.696E+07 | 5.392E+07 | 9.713E+07 | 1.313E+08 |
| PC(16:1/14:0)+H      | PC | (16:1)  | (14:0) | 2.418E+08 | 3.219E+08 | 4.825E+08 | 1.204E+09 | 9.106E+08 | 7.695E+08 | 9.082E+08 | 1.924E+09 | 2.715E+09 |
| PC(16:1/14:0)+H      | PC | (16:1)  | (14:0) | 9.573E+07 | 1.997E+08 | 2.428E+08 | 7.079E+08 | 2.016E+08 | 4.179E+08 | 4.098E+08 | 8.770E+08 | 1.026E+09 |
| PC(12:0e/18:1)+H     | PC | (12:0e) | (18:1) | 1.489E+06 | 3.046E+07 | 3.274E+07 | 3.673E+08 | 9.488E+07 | 3.197E+07 | 3.211E+08 | 5.785E+08 | 3.574E+08 |
| PC(12:0/18:2)+H      | PC | (12:0)  | (18:2) | 2.013E+06 | 3.405E+06 | 2.057E+06 | 7.933E+07 | 8.864E+07 | 4.190E+07 | 4.162E+06 | 4.224E+07 | 3.877E+07 |
| PC(16:0/15:0)+CH3COO | PC | (16:0)  | (15:0) | 3.973E+07 | 2.662E+07 | 3.158E+07 | 9.654E+07 | 2.454E+08 | 1.621E+08 | 2.266E+08 | 2.667E+08 | 3.173E+08 |
| PC(16:0/15:0)+HCOO   | PC | (16:0)  | (15:0) | 1.412E+08 | 3.393E+08 | 2.236E+08 | 1.573E+08 | 4.808E+07 | 4.030E+07 | 5.760E+07 | 1.939E+08 | 3.691E+08 |
| PC(16:0/15:0)+H      | PC | (16:0)  | (15:0) | 5.319E+09 | 5.441E+09 | 5.368E+09 | 2.665E+09 | 2.989E+09 | 2.232E+09 | 4.109E+09 | 4.262E+09 | 5.550E+09 |
| PC(16:0e/15:0)+H     | PC | (16:0e) | (15:0) | 4.319E+06 | 2.682E+07 | 6.123E+06 | 1.775E+08 | 1.088E+08 | 7.880E+07 | 1.753E+08 | 1.166E+09 | 2.148E+09 |
| PC(16:0e/15:0)+H     | PC | (16:0e) | (15:0) | 2.160E+06 | 9.092E+06 | 0.000E+00 | 9.602E+07 | 1.478E+07 | 4.092E+07 | 1.767E+08 | 6.261E+08 | 1.185E+09 |
| PC(16:1/15:0)+HCOO   | PC | (16:1)  | (15:0) | 1.475E+03 | 9.422E+04 | 1.483E+07 | 6.256E+06 | 5.071E+02 | 1.291E+05 | 2.393E+07 | 1.291E+05 | 9.693E+07 |
| PC(16:1/15:0)+H      | PC | (16:1)  | (15:0) | 1.096E+06 | 1.045E+09 | 9.741E+08 | 1.291E+09 | 1.435E+09 | 6.721E+08 | 1.460E+09 | 1.851E+09 | 3.234E+09 |
| PC(18:1/13:0)+H      | PC | (18:1)  | (13:0) | 2.699E+09 | 2.987E+09 | 2.721E+09 | 3.910E+09 | 4.920E+09 | 2.875E+09 | 6.114E+09 | 4.624E+09 | 5.682E+09 |
| PC(16:0e/15:1)+H     | PC | (16:0e) | (15:1) | 5.915E+06 | 5.741E+06 | 9.865E+06 | 1.855E+07 | 5.241E+06 | 1.361E+07 | 8.664E+06 | 1.812E+07 | 7.719E+07 |
| PC(16:0p/15:1)+H     | PC | (16:0p) | (15:1) | 1.304E+08 | 1.495E+08 | 8.525E+07 | 6.840E+07 | 9.138E+07 | 5.332E+07 | 4.727E+07 | 5.685E+08 | 1.611E+08 |
| PC(16:1/15:1)+H      | PC | (16:1)  | (15:1) | 7.504E+06 | 2.460E+05 | 3.250E+06 | 4.579E+06 | 2.879E+07 | 1.034E+06 | 5.120E+06 | 6.415E+06 | 3.116E+07 |
| PC(15:1/16:2)+H      | PC | (15:1)  | (16:2) | 2.774E+08 | 6.173E+07 | 6.123E+07 | 1.156E+08 | 4.411E+08 | 8.737E+06 | 3.613E+08 | 2.531E+07 | 2.976E+08 |
| PC(16:0/16:0)+HCOO   | PC | (16:0)  | (16:0) | 3.364E+09 | 2.661E+09 | 3.572E+09 | 4.079E+09 | 3.124E+09 | 2.961E+09 | 3.567E+09 | 3.972E+09 | 2.993E+09 |
| PC(16:0/16:0)+H      | PC | (16:0)  | (16:0) | 2.563E+10 | 1.864E+10 | 2.801E+10 | 2.351E+10 | 2.062E+10 | 2.481E+10 | 2.723E+10 | 2.389E+10 | 1.918E+10 |
| PC(16:0e/16:0)+HCOO  | PC | (16:0e) | (16:0) | 5.960E+07 | 8.003E+07 | 4.905E+07 | 7.648E+08 | 4.494E+08 | 3.778E+08 | 3.495E+08 | 1.238E+09 | 1.368E+09 |
| PC(16:0e/16:0)+H     | PC | (16:0e) | (16:0) | 1.282E+09 | 1.409E+09 | 1.127E+09 | 7.689E+09 | 5.206E+09 | 5.488E+09 | 5.016E+09 | 1.240E+10 | 1.338E+10 |
| PC(18:0p/14:0)+HCOO  | PC | (18:0p) | (14:0) | 1.815E+05 | 2.027E+05 | 3.750E+05 | 1.128E+08 | 4.877E+07 | 2.625E+07 | 6.487E+07 | 2.517E+08 | 4.499E+08 |
| PC(16:0p/16:0)+HCOO  | PC | (16:0p) | (16:0) | 1.251E+08 | 8.519E+07 | 6.819E+07 | 6.426E+08 | 5.167E+08 | 2.571E+08 | 3.956E+08 | 6.174E+08 | 6.299E+08 |
| PC(16:0/16:1)+HCOO   | PC | (16:0)  | (16:1) | 6.866E+08 | 6.959E+08 | 8.150E+08 | 2.392E+09 | 2.297E+09 | 1.457E+09 | 1.975E+09 | 2.306E+09 | 2.348E+09 |
| PC(16:0/16:1)+H      | PC | (16:0)  | (16:1) | 4.804E+09 | 4.822E+09 | 5.516E+09 | 1.518E+10 | 1.523E+10 | 1.211E+10 | 1.641E+10 | 1.712E+10 | 5.155E+10 |
| PC(16:0e/16:1)+H     | PC | (16:0e) | (16:1) | 2.788E+07 | 4.516E+07 | 5.310E+07 | 2.264E+09 | 1.628E+09 | 1.437E+09 | 1.885E+09 | 3.648E+09 | 7.902E+09 |
| PC(16:0e/16:1)+H     | PC | (16:0e) | (16:1) | 1.837E+09 | 1.303E+09 | 2.158E+09 | 6.020E+09 | 5.545E+09 | 3.194E+09 | 5.100E+09 | 5.661E+09 | 6.499E+09 |
| PC(16:0p/16:1)+HCOO  | PC | (16:0p) | (16:1) | 2.359E+04 | 1.082E+06 | 4.920E+05 | 6.972E+07 | 1.762E+07 | 1.218E+07 | 7.477E+06 | 1.416E+07 | 9.568E+07 |
| PC(16:0p/16:1)+H     | PC | (16:0p) | (16:1) | 6.078E+07 | 4.797E+07 | 5.526E+07 | 1.066E+09 | 9.355E+08 | 3.79E+08  | 8.210E+08 | 1.810E+09 | 1.268E+09 |
| PC(16:1/16:1)+CH3COO | PC | (16:1)  | (16:1) | 2.713E+05 | 1.888E+05 | 2.006E+07 | 3.408E+08 | 5.867E+08 | 6.247E+08 | 4.621E+08 | 5.038E+08 | 9.940E+08 |
| PC(16:1/16:1)+HCOO   | PC | (16:1)  | (16:1) | 1.030E+08 | 1.183E+08 | 1.640E+08 | 3.503E+08 | 4.497E+08 | 2.152E+08 | 3.975E+08 | 4.407E+08 | 5.224E+08 |
| PC(16:1/16:1)+H      | PC | (16:1)  | (16:1) | 2.051E+09 | 1.817E+09 | 2.760E+09 | 3.306E+09 | 5.999E+09 | 3.442E+09 | 5.463E+09 | 7.690E+09 | 9.151E+09 |
| PC(16:1/16:2)+H      | PC | (16:1)  | (16:2) | 1.872E+07 | 3.495E+07 | 3.068E+07 | 8.323E+07 | 6.251E+07 | 3.357E+07 | 1.249E+07 | 7.026E+07 | 6.515E+07 |
| PC(16:1/16:2)+H      | PC | (16:1)  | (16:2) | 2.332E+07 | 1.417E+07 | 1.609E+07 | 2.529E+07 | 5.170E+07 | 3.956E+07 | 2.384E+07 | 3.312E+07 | 6.202E+07 |
| PC(16:1/16:2)+H      | PC | (16:1)  | (16:2) | 7.900E+07 | 5.219E+06 | 1.993E+07 | 9.140E+07 | 5.992E+07 | 6.456E+07 | 2.045E+07 | 8.270E+07 | 6.220E+07 |
| PC(12:0/20:4)+H      | PC | (12:0)  | (20:4) | 5.545E+06 | 0.000E+00 | 3.885E+06 | 8.668E+06 | 9.411E+05 | 1.076E+07 | 1.542E+06 | 4.977E+06 | 5.216E+06 |
| PC(12:0p/20:5)+H     | PC | (12:0p) | (20:5) | 8.771E+06 | 1.437E+07 | 2.897E+06 | 0.000E+00 | 1         |           |           |           |           |

|                       |    |         |        |           |           |           |           |           |           |           |           |           |
|-----------------------|----|---------|--------|-----------|-----------|-----------|-----------|-----------|-----------|-----------|-----------|-----------|
| PC(16:0/18:1)+CH3COO  | PC | (16:0)  | (18:1) | 3.049E+08 | 3.383E+08 | 3.247E+08 | 2.815E+08 | 2.946E+08 | 1.746E+08 | 2.277E+08 | 3.181E+08 | 4.261E+08 |
| PC(20:1/14:0)+H       | PC | (20:1)  | (14:0) | 1.068E+07 | 3.487E+07 | 3.725E+07 | 6.278E+07 | 1.621E+07 | 6.316E+07 | 9.854E+06 | 8.701E+07 | 2.322E+07 |
| PC(16:0E/18:1)+H      | PC | (16:0E) | (18:1) | 2.616E+09 | 3.060E+09 | 2.732E+09 | 1.455E+10 | 1.258E+10 | 1.149E+10 | 1.360E+10 | 2.959E+10 | 3.709E+10 |
| PC(16:0p/18:1)+HCOO   | PC | (16:0p) | (18:1) | 3.208E+08 | 2.837E+08 | 2.617E+08 | 8.797E+08 | 5.920E+08 | 3.689E+08 | 6.442E+08 | 8.616E+08 | 9.763E+08 |
| PC(16:0p/18:1)+H      | PC | (16:0p) | (18:1) | 1.077E+08 | 8.541E+07 | 1.082E+08 | 1.707E+08 | 1.289E+08 | 1.041E+08 | 1.744E+08 | 2.100E+08 | 1.433E+08 |
| PC(16:1/18:1)+HCOO    | PC | (16:1)  | (18:1) | 6.269E+09 | 6.991E+09 | 7.949E+09 | 5.757E+09 | 7.997E+09 | 4.725E+09 | 6.101E+09 | 7.491E+09 | 7.787E+09 |
| PC(16:1/18:1)+H       | PC | (16:1)  | (18:1) | 4.827E+10 | 5.144E+10 | 5.763E+10 | 5.214E+10 | 5.449E+10 | 4.385E+10 | 5.794E+10 | 6.119E+10 | 6.215E+10 |
| PC(16:0E/18:2)+HCOO   | PC | (16:0E) | (18:2) | 2.185E+07 | 2.595E+07 | 1.506E+06 | 1.164E+08 | 6.513E+07 | 8.282E+07 | 3.959E+07 | 1.793E+08 | 1.325E+08 |
| PC(16:0E/18:2)+H      | PC | (16:0E) | (18:2) | 3.030E+08 | 7.366E+08 | 1.948E+08 | 1.999E+09 | 1.314E+09 | 1.705E+09 | 1.240E+09 | 2.781E+09 | 3.016E+09 |
| PC(16:0E/18:2)+H      | PC | (16:0E) | (18:2) | 4.009E+09 | 3.705E+09 | 3.442E+09 | 8.159E+09 | 6.919E+09 | 5.483E+09 | 8.618E+09 | 8.309E+09 | 9.960E+09 |
| PC(16:0p/18:2)+HCOO   | PC | (16:0p) | (18:2) | 1.945E+07 | 2.528E+07 | 6.270E+07 | 7.896E+07 | 7.156E+07 | 8.175E+07 | 5.276E+07 | 8.119E+07 | 1.170E+08 |
| PC(16:0p/18:2)+H      | PC | (16:0p) | (18:2) | 1.183E+09 | 1.363E+09 | 1.324E+09 | 2.032E+09 | 1.918E+09 | 1.428E+09 | 1.612E+09 | 1.332E+09 | 2.115E+09 |
| PC(16:1/18:2)+HCOO    | PC | (16:1)  | (18:2) | 2.501E+08 | 3.265E+08 | 4.059E+08 | 5.878E+08 | 6.021E+08 | 2.843E+08 | 6.022E+08 | 8.029E+08 | 8.189E+08 |
| PC(16:1/18:2)+H       | PC | (16:1)  | (18:2) | 6.143E+09 | 5.982E+09 | 6.465E+09 | 1.184E+10 | 1.244E+10 | 6.473E+09 | 1.151E+10 | 1.283E+10 | 1.355E+10 |
| PC(16:1/18:2)+HCOO    | PC | (16:1)  | (18:2) | 1.212E+08 | 1.757E+08 | 9.459E+07 | 7.211E+07 | 1.118E+08 | 6.653E+07 | 5.722E+07 | 1.575E+08 | 6.277E+07 |
| PC(16:1p/18:2)+H      | PC | (16:1p) | (18:2) | 3.252E+06 | 1.660E+07 | 7.341E+06 | 3.602E+06 | 1.092E+07 | 1.087E+07 | 7.909E+07 | 2.446E+07 | 2.800E+07 |
| PC(16:1/18:3)+CH3COO  | PC | (16:1)  | (18:3) | 0.000E+00 | 0.000E+00 | 3.297E+07 | 7.313E+06 | 1.493E+07 | 5.192E+07 | 7.095E+06 | 4.132E+06 | 5.838E+06 |
| PC(16:1/18:3)+HCOO    | PC | (16:1)  | (18:3) | 2.251E+06 | 7.700E+05 | 5.617E+06 | 7.232E+06 | 4.693E+06 | 6.802E+05 | 7.758E+06 | 4.034E+06 | 2.778E+06 |
| PC(16:1/18:3)+H       | PC | (16:1)  | (18:3) | 5.438E+07 | 6.320E+07 | 2.291E+08 | 1.242E+08 | 1.543E+08 | 7.883E+07 | 1.469E+08 | 1.574E+08 | 2.342E+08 |
| PC(14:0/20:4)+HCOO    | PC | (14:0)  | (20:4) | 1.146E+08 | 5.260E+07 | 1.299E+08 | 1.037E+07 | 3.633E+07 | 3.636E+07 | 2.822E+07 | 8.544E+07 | 7.430E+07 |
| PC(14:0/20:4)+H       | PC | (14:0)  | (20:4) | 1.702E+09 | 6.331E+08 | 2.332E+09 | 7.437E+08 | 5.631E+08 | 4.556E+08 | 4.692E+08 | 9.434E+08 | 1.175E+09 |
| PC(14:0E/20:4)+HCOO   | PC | (14:0E) | (20:4) | 4.698E+05 | 1.644E+03 | 3.028E+05 | 1.650E+06 | 8.440E+05 | 1.113E+06 | 1.083E+06 | 4.856E+06 | 1.721E+06 |
| PC(14:0p/20:4)+H      | PC | (14:0p) | (20:4) | 3.293E+07 | 5.242E+07 | 4.312E+07 | 3.254E+07 | 3.198E+07 | 3.130E+07 | 4.306E+07 | 4.213E+07 | 2.732E+07 |
| PC(14:0p/20:4)+CH3COO | PC | (14:0p) | (20:4) | 1.224E+07 | 1.565E+07 | 6.483E+06 | 0.000E+00 | 1.370E+05 | 0.000E+00 | 8.259E+05 | 3.912E+04 | 6.116E+06 |
| PC(14:0/20:5)+HCOO    | PC | (14:0)  | (20:5) | 1.603E+07 | 4.761E+06 | 2.250E+07 | 2.103E+07 | 2.805E+07 | 9.937E+06 | 1.791E+07 | 3.793E+07 | 6.068E+07 |
| PC(14:0/20:5)+H       | PC | (14:0)  | (20:5) | 1.776E+08 | 1.278E+08 | 2.690E+08 | 7.058E+07 | 8.882E+07 | 5.126E+07 | 8.237E+07 | 1.076E+08 | 3.010E+08 |
| PC(16:2/18:3)+H       | PC | (16:2)  | (18:3) | 4.683E+06 | 7.728E+06 | 1.889E+07 | 4.901E+07 | 2.929E+07 | 8.563E+07 | 7.689E+07 | 1.317E+08 | 1.327E+08 |
| PC(16:2/18:3)+H       | PC | (16:2)  | (18:3) | 1.223E+07 | 2.336E+07 | 2.718E+07 | 3.013E+04 | 4.905E+06 | 3.269E+06 | 6.740E+06 | 1.314E+07 | 7.465E+06 |
| PC(12:0E/22:6)+H      | PC | (12:0E) | (22:6) | 7.031E+06 | 2.623E+06 | 2.674E+06 | 6.965E+03 | 6.618E+05 | 0.000E+00 | 1.400E+06 | 3.330E+06 | 1.020E+07 |
| PC(16:0/19:0)+H       | PC | (16:0)  | (19:0) | 1.352E+08 | 1.261E+08 | 7.750E+07 | 1.265E+07 | 2.140E+07 | 3.124E+07 | 1.035E+08 | 1.226E+07 | 1.667E+08 |
| PC(17:0/18:1)+HCOO    | PC | (17:0)  | (18:1) | 3.294E+08 | 3.019E+08 | 3.280E+08 | 2.811E+08 | 2.899E+08 | 1.710E+08 | 2.277E+08 | 3.181E+08 | 4.519E+08 |
| PC(17:0/18:1)+H       | PC | (17:0)  | (18:1) | 3.789E+09 | 3.917E+09 | 3.938E+09 | 2.748E+09 | 3.441E+09 | 2.323E+09 | 2.947E+09 | 3.464E+09 | 4.566E+09 |
| PC(16:0/19:1)+H       | PC | (16:0)  | (19:1) | 4.990E+07 | 3.377E+07 | 7.252E+07 | 3.368E+08 | 3.250E+08 | 1.869E+08 | 2.663E+07 | 1.549E+08 | 2.157E+08 |
| PC(16:0p/19:1)+H      | PC | (16:0p) | (19:1) | 1.545E+08 | 2.313E+08 | 7.338E+07 | 6.876E+07 | 2.263E+07 | 1.099E+08 | 2.011E+07 | 3.080E+07 | 2.746E+07 |
| PC(17:1/18:1)+HCOO    | PC | (17:1)  | (18:1) | 2.235E+08 | 9.565E+07 | 9.113E+07 | 1.466E+08 | 1.918E+07 | 8.246E+07 | 2.076E+08 | 2.747E+08 | 3.876E+08 |
| PC(17:1/18:1)+H       | PC | (17:1)  | (18:1) | 1.931E+09 | 4.047E+09 | 3.457E+09 | 2.592E+09 | 2.190E+09 | 1.226E+09 | 7.210E+08 | 3.483E+09 | 4.488E+09 |
| PC(16:1/19:1)+H       | PC | (16:1)  | (19:1) | 2.849E+09 | 4.070E+09 | 3.148E+09 | 2.687E+09 | 9.604E+08 | 8.006E+08 | 7.943E+08 | 3.583E+09 | 1.178E+09 |
| PC(17:1/18:1)+H       | PC | (17:1)  | (18:1) | 1.013E+07 | 1.205E+08 | 7.341E+07 | 7.420E+08 | 1.019E+09 | 1.233E+09 | 6.658E+08 | 5.061E+08 | 9.062E+08 |
| PC(17:1/18:2)+HCOO    | PC | (17:1)  | (18:2) | 5.571E+07 | 6.133E+07 | 1.175E+08 | 2.043E+07 | 3.995E+07 | 4.654E+07 | 3.415E+07 | 4.354E+07 | 5.349E+07 |
| PC(17:1/18:2)+H       | PC | (17:1)  | (18:2) | 1.423E+09 | 6.139E+08 | 9.820E+08 | 4.553E+08 | 2.368E+08 | 3.262E+08 | 5.740E+08 | 3.443E+08 | 6.289E+08 |
| PC(17:1/18:2)+H       | PC | (17:1)  | (18:2) | 6.456E+08 | 7.821E+08 | 8.048E+08 | 8.068E+08 | 8.094E+08 | 8.183E+08 | 8.837E+08 | 7.678E+08 | 6.648E+08 |
| PC(18:2p/17:1)+H      | PC | (18:2p) | (17:1) | 0.000E+00 | 1.017E+05 | 6.125E+04 | 7.992E+06 | 2.159E+06 | 3.830E+06 | 3.534E+06 | 1.674E+07 | 3.703E+07 |
| PC(15:0/20:4)+HCOO    | PC | (15:0)  | (20:4) | 5.669E+08 | 3.062E+08 | 5.400E+08 | 6.071E+07 | 1.054E+08 | 4.906E+07 | 6.187E+07 | 1.799E+07 | 3.244E+08 |
| PC(15:0/20:4)+H       | PC | (15:0)  | (20:4) | 8.239E+09 | 4.701E+09 | 7.669E+09 | 1.054E+09 | 9.682E+08 | 7.479E+08 | 1.233E+09 | 1.123E+09 | 2.194E+09 |
| PC(15:0/20:4)+H       | PC | (15:0)  | (20:4) | 7.725E+09 | 5.688E+09 | 7.553E+09 | 6.875E+09 | 3.375E+09 | 7.302E+09 | 5.105E+09 | 6.950E+09 | 6.472E+09 |
| PC(15:1/20:3)+HCOO    | PC | (15:1)  | (20:3) | 0.000E+00 | 8.027E+05 | 3.032E+06 | 2.024E+06 | 2.368E+06 | 4.065E+07 | 2.056E+05 | 4.468E+05 | 8.899E+06 |
| PC(15:0/20:5)+HCOO    | PC | (15:0)  | (20:5) | 4.045E+07 | 4.504E+07 | 1.233E+08 | 7.802E+07 | 1.255E+08 | 1.771E+06 | 1.588E+07 | 3.568E+07 | 3.360E+08 |
| PC(15:0/20:5)+H       | PC | (15:0)  | (20:5) | 5.580E+08 | 4.777E+08 | 7.055E+08 | 3.348E+07 | 9.217E+07 | 4.797E+07 | 1.197E+08 | 1.130E+08 | 4.477E+08 |
| PC(15:1/20:4)+H       | PC | (15:1)  | (20:4) | 7.386E+07 | 1.337E+08 | 6.113E+07 | 6.140E+06 | 5.693E+07 | 3.744E+06 | 2.784E+07 | 1.430E+07 | 3.741E+07 |
| PC(15:1/20:4)+H       | PC | (15:1)  | (20:4) | 2.620E+09 | 1.774E+09 | 2.779E+09 | 1.543E+09 | 1.535E+09 | 9.116E+08 | 1.952E+09 | 1.785E+09 | 1.473E+09 |
| PC(13:0/22:6)+H       | PC | (13:0)  | (22:6) | 2.722E+06 | 2.360E+06 | 8.138E+06 | 3.216E+06 | 2.012E+06 | 7.954E+05 | 2.965E+06 | 5.273E+06 | 3.338E+06 |
| PC(13:0/22:6)+H       | PC | (13:0)  | (22:6) | 3.536E+08 | 6.487E+08 | 6.755E+08 | 7.751E+07 | 2.679E+08 | 1.250E+08 | 5.049E+08 | 1.023E+08 | 2.805E+08 |
| PC(13:0/22:6)+H       | PC | (13:0)  | (22:6) | 1.998E+09 | 1.568E+09 | 2.031E+09 | 1.979E+09 | 2.498E+09 | 2.140E+09 | 3.598E+09 | 2.539E+09 | 2.745E+09 |
| PC(18:0/18:0)+HCOO    | PC | (18:0)  | (18:0) | 6.259E+07 | 7.631E+07 | 8.263E+07 | 8.882E+07 | 1.181E+08 | 7.666E+07 | 8.083E+07 | 1.012E+08 | 8.616E+07 |
| PC(18:0/18:0)+H       | PC | (18:0)  | (18:0) | 1.204E+09 | 4.519E+08 | 9.775E+08 | 5.816E+08 | 4.874E+08 | 4.897E+08 | 8.418E+08 | 7.918E+08 | 4.616E+08 |
| PC(20:0E/16:0)+HCOO   | PC | (20:0E) | (16:0) | 0.000E+00 | 1.812E+06 | 0.000E+00 | 2.889E+06 | 0.000E+00 | 0.000E+00 | 0.000E+00 | 3.280E+06 | 4.114E+06 |
| PC(20:0E/16:0)+H      | PC | (20:0E) | (16:0) | 5.836E+05 | 5.760E+05 | 0.000E+00 | 9.816E+07 | 1.803E+07 | 2.591E+07 | 1.127E+07 | 7.047E+07 | 6.432E+07 |
| PC(18:0/18:1)+HCOO    | PC | (18:0)  | (18:1) | 3.083E+09 | 2.653E+09 | 2.785E+09 | 4.247E+09 | 3.696E+09 | 2.559E+09 | 2.971E+09 | 4.273E+09 | 3.949E+09 |
| PC(18:0/18:1)+H       | PC | (18:0)  | (18:1) | 2.901E+10 | 2.459E+10 | 2.633E+10 | 3.422E+10 | 3.387E+10 | 2.860E+10 | 3.317E+10 | 3.766E+10 | 3.671E+10 |
| PC(16:0E/20:1)+HCOO   | PC | (16:0E) | (20:1) | 3.026E+07 | 5.359E+07 | 5.403E+07 | 1.242E+08 | 5.960E+07 | 6.351E+07 | 4.039E+07 | 1.262E+08 | 1.331E+08 |
| PC(16:0E/20:1)+H      | PC | (16:0E) | (20:1) | 1.565E+06 | 4.557E+06 | 6.566E+05 | 6.522E+08 | 2.562E+08 | 3.759E+08 | 2.165E+08 | 1.542E+09 | 1.741E+09 |
| PC(18:0p/18:1)+HCOO   | PC | (18:0p) | (18:1) | 3.617E+03 | 1.470E+05 | 0.000E+00 | 3.116E+08 | 2.082E+08 | 1.323E+08 | 1.072E+08 | 2.232E+08 | 1.505E+08 |
| PC(16:0p/20:1)+HCOO   | PC | (16:0p) | (20:1) | 7.109E+06 | 1.009E+07 | 6.686E+06 | 1.793E+08 | 1.381E+08 | 6.327E+07 | 8.526E+07 | 1.277E+08 | 1.061E+08 |
| PC(18:1/18:1)+HCOO    | PC | (18:1)  | (18:1) | 1.584E+09 | 2.024E+09 | 2.172E+09 | 2.919E+09 | 3.521E+09 | 1.677E+09 | 2.092E+09 | 3.729E+09 | 4.259E+09 |
| PC(18:1/18:1)+HCOO    | PC | (18:1)  | (18:1) | 4.162E+09 | 4.328E+09 | 4.341E+09 | 5.697E+09 | 6.010E+09 | 3.423E+09 | 5.390E+09 | 5.843E+09 | 2.758E+09 |
| PC(18:1/18:1)+H       | PC | (18:1)  | (18:1) | 3.607E+10 | 3.591E+10 | 3.907E+10 | 3.642E+10 | 3.562E+10 | 3.031E+10 | 3.526E+10 | 3.132E+10 | 3.316E+10 |
| PC(18:0E/18:2)+HCOO   | PC | (18:0E) | (18:2) | 3.617E+03 | 1.470E+05 | 0.000E+00 | 3.116E+08 | 1.363E+08 | 1.323E+08 | 1.072E+08 | 3.006E+08 | 1.695E+08 |
| PC(18:0E/18:2)+H      | PC | (18:0E) | (18:2) | 3.469E+08 | 4.864E+08 | 1.706E+08 | 2.164E+09 | 1.236E+09 | 1.515E+09 | 1.178E+09 | 3.279E+09 | 2.801E+09 |
| PC(18:0E/18:2)+H      | PC | (18:0E) | (18:2) | 9.250E+07 | 4.910E+07 | 9.173E+07 | 1.394E+09 | 6.211E+08 | 4.595E+08 | 1.047E+09 | 1.158E+09 | 1.253E+09 |
| PC(16:1p/20:1)+HCOO   | PC | (16:1p) | (20:1) | 1.952E+06 | 1.793E+06 | 1.790E+06 | 6.253E+07 | 2.919E+07 | 2.185E+07 | 1.519E+07 | 5.185E+07 | 1.307E+07 |
| PC(18:1p/18:1)+HCOO   | PC | (18:1p) | (18:1) | 0.000E+00 | 3.565E+06 | 7.607E+03 | 8.095E+07 | 2.783E+07 | 4.058E+07 | 4         |           |           |









|                   |     |         |        |           |           |           |           |           |           |           |           |           |
|-------------------|-----|---------|--------|-----------|-----------|-----------|-----------|-----------|-----------|-----------|-----------|-----------|
| PE(17:1/22:6)+H   | PE  | (17:1)  | (22:6) | 1.517E+04 | 1.588E+07 | 5.388E+06 | 7.965E+06 | 2.328E+07 | 7.014E+06 | 1.086E+07 | 3.208E+06 | 4.743E+07 |
| PE(18:1/22:0)+H   | PE  | (18:1)  | (22:0) | 2.027E+07 | 1.578E+07 | 6.793E+06 | 8.440E+07 | 2.373E+08 | 1.763E+08 | 1.185E+08 | 3.925E+07 | 6.080E+07 |
| PE(18:0p/22:1)+H  | PE  | (18:0p) | (22:1) | 1.528E+06 | 2.004E+06 | 1.415E+06 | 3.084E+06 | 1.126E+06 | 1.574E+06 | 3.110E+05 | 4.012E+05 | 1.040E+06 |
| PE(18:1/22:1)+H   | PE  | (18:1)  | (22:1) | 6.969E+06 | 3.080E+06 | 1.374E+06 | 7.103E+07 | 1.783E+08 | 4.179E+07 | 6.160E+07 | 1.202E+08 | 5.782E+07 |
| PE(18:1/22:1)+H   | PE  | (18:1)  | (22:1) | 7.561E+06 | 4.354E+06 | 3.229E+06 | 5.218E+07 | 1.353E+08 | 4.864E+07 | 3.122E+07 | 5.972E+07 | 1.169E+07 |
| PE(18:1p/22:1)+H  | PE  | (18:1p) | (22:1) | 7.807E+06 | 6.823E+06 | 9.987E+06 | 1.761E+07 | 1.170E+07 | 2.516E+07 | 1.440E+06 | 7.316E+06 | 2.204E+06 |
| PE(18:0/22:4)+H   | PE  | (18:0)  | (22:4) | 5.031E+08 | 2.942E+08 | 4.038E+08 | 8.610E+08 | 5.822E+08 | 6.056E+08 | 4.350E+08 | 6.872E+08 | 4.424E+08 |
| PE(18:0/22:4)+H   | PE  | (18:0)  | (22:4) | 9.285E+08 | 4.138E+08 | 8.876E+08 | 1.210E+09 | 7.344E+08 | 1.288E+09 | 8.588E+08 | 1.303E+09 | 8.814E+08 |
| PE(18:0/22:4)+H   | PE  | (18:0)  | (22:4) | 1.104E+09 | 5.898E+08 | 8.693E+08 | 1.210E+09 | 8.039E+08 | 1.635E+08 | 8.268E+08 | 1.245E+09 | 9.950E+08 |
| PE(20:0p/20:4)+H  | PE  | (20:0p) | (20:4) | 1.132E+09 | 9.527E+08 | 1.393E+09 | 2.011E+09 | 1.656E+09 | 2.629E+09 | 2.060E+09 | 2.412E+09 | 1.872E+09 |
| PE(18:0p/22:4)+H  | PE  | (18:0p) | (22:4) | 1.013E+09 | 3.585E+08 | 5.714E+08 | 8.247E+08 | 2.077E+08 | 5.945E+08 | 4.429E+08 | 9.096E+08 | 7.438E+08 |
| PE(18:0p/22:4)+H  | PE  | (18:0p) | (22:4) | 1.237E+09 | 3.508E+08 | 5.192E+08 | 1.306E+09 | 9.239E+08 | 6.123E+08 | 8.874E+08 | 1.026E+09 | 5.106E+08 |
| PE(18:0/22:5)+H   | PE  | (18:0)  | (22:5) | 3.627E+08 | 2.366E+08 | 3.278E+08 | 5.220E+08 | 4.112E+08 | 3.894E+08 | 3.322E+08 | 4.914E+08 | 3.621E+08 |
| PE(18:0/22:5)+H   | PE  | (18:0)  | (22:5) | 1.840E+08 | 3.254E+08 | 8.157E+08 | 7.479E+08 | 7.384E+08 | 1.077E+09 | 7.214E+08 | 8.664E+08 | 8.283E+08 |
| PE(18:0/22:5)+H   | PE  | (18:0)  | (22:5) | 1.102E+08 | 2.817E+07 | 1.390E+08 | 2.513E+08 | 1.203E+08 | 1.813E+08 | 1.237E+08 | 2.034E+08 | 1.009E+08 |
| PE(20:1p/20:4)+H  | PE  | (20:1p) | (20:4) | 1.230E+07 | 3.663E+07 | 3.847E+07 | 6.924E+07 | 1.641E+08 | 7.655E+07 | 1.574E+08 | 9.977E+07 | 6.659E+07 |
| PE(18:0p/22:5)+H  | PE  | (18:0p) | (22:5) | 4.379E+08 | 4.157E+08 | 4.897E+08 | 9.356E+08 | 5.619E+08 | 6.924E+08 | 4.716E+08 | 6.706E+08 | 4.532E+08 |
| PE(18:0p/22:5)+H  | PE  | (18:0p) | (22:5) | 8.169E+08 | 6.776E+08 | 7.923E+08 | 1.204E+09 | 9.439E+08 | 8.543E+08 | 7.614E+08 | 7.174E+08 | 1.127E+09 |
| PE(18:1/22:5)+H   | PE  | (18:1)  | (22:5) | 6.720E+07 | 8.081E+07 | 3.710E+07 | 2.522E+07 | 1.324E+08 | 3.186E+07 | 1.321E+08 | 1.376E+08 | 5.915E+07 |
| PE(18:0/22:6)+H   | PE  | (18:0)  | (22:6) | 1.360E+09 | 8.588E+08 | 1.308E+09 | 2.007E+09 | 1.679E+09 | 1.831E+09 | 1.227E+09 | 1.934E+09 | 1.527E+09 |
| PE(18:0/22:6)+H   | PE  | (18:0)  | (22:6) | 2.092E+09 | 1.155E+09 | 2.038E+09 | 2.113E+09 | 2.077E+09 | 3.056E+09 | 1.956E+09 | 2.561E+09 | 1.184E+09 |
| PE(18:1p/22:5)+H  | PE  | (18:1p) | (22:5) | 3.132E+08 | 6.632E+08 | 7.944E+08 | 8.945E+08 | 5.587E+08 | 6.436E+08 | 1.113E+09 | 9.319E+08 | 1.023E+09 |
| PE(18:1p/22:5)+H  | PE  | (18:1p) | (22:5) | 9.069E+08 | 8.649E+08 | 2.219E+08 | 2.367E+08 | 5.141E+08 | 1.430E+08 | 4.880E+08 | 6.847E+08 | 2.237E+08 |
| PE(18:0p/22:6)+H  | PE  | (18:0p) | (22:6) | 1.816E+09 | 1.445E+09 | 1.718E+09 | 1.964E+09 | 1.666E+09 | 1.374E+09 | 1.226E+09 | 1.989E+09 | 1.568E+09 |
| PE(18:0p/22:6)+H  | PE  | (18:0p) | (22:6) | 3.609E+09 | 2.975E+09 | 3.550E+09 | 3.090E+09 | 3.182E+09 | 3.266E+09 | 2.720E+09 | 3.511E+09 | 3.102E+09 |
| PE(18:1/22:6)+H   | PE  | (18:1)  | (22:6) | 1.344E+09 | 1.047E+09 | 1.259E+09 | 8.694E+08 | 1.078E+09 | 5.898E+08 | 1.292E+09 | 1.034E+09 | 8.668E+08 |
| PE(18:1/22:6)+H   | PE  | (18:1)  | (22:6) | 1.752E+09 | 1.180E+09 | 1.715E+09 | 1.147E+09 | 1.603E+09 | 9.861E+08 | 2.378E+09 | 1.313E+09 | 1.466E+09 |
| PE(18:1p/22:6)+H  | PE  | (18:1p) | (22:6) | 1.425E+09 | 1.284E+09 | 1.358E+09 | 2.374E+09 | 2.697E+09 | 1.698E+09 | 2.716E+09 | 3.116E+09 | 2.387E+09 |
| PE(18:1p/22:6)+H  | PE  | (18:1p) | (22:6) | 2.668E+09 | 2.623E+09 | 2.546E+09 | 4.407E+09 | 5.475E+09 | 4.107E+09 | 6.777E+09 | 5.663E+09 | 5.326E+09 |
| PE(18:1p/22:6)+H  | PE  | (18:1p) | (22:6) | 2.737E+08 | 6.083E+08 | 2.766E+08 | 2.296E+08 | 5.913E+07 | 3.945E+08 | 4.282E+08 | 3.069E+08 | 3.036E+08 |
| PE(18:2/22:6)+H   | PE  | (18:2)  | (22:6) | 9.575E+07 | 7.329E+07 | 7.509E+07 | 8.509E+07 | 9.047E+07 | 4.667E+07 | 7.616E+07 | 1.268E+08 | 5.501E+07 |
| PE(18:2/22:6)+H   | PE  | (18:2)  | (22:6) | 3.065E+08 | 2.092E+08 | 1.251E+08 | 3.309E+08 | 3.006E+08 | 1.563E+08 | 3.124E+08 | 5.100E+08 | 2.943E+08 |
| PE(18:2p/22:6)+H  | PE  | (18:2p) | (22:6) | 2.620E+08 | 2.385E+08 | 2.569E+08 | 2.549E+08 | 2.520E+08 | 9.735E+07 | 1.781E+08 | 2.827E+08 | 1.609E+08 |
| PE(20:5/20:4)+H   | PE  | (20:5)  | (20:4) | 8.589E+06 | 3.295E+06 | 1.965E+04 | 2.140E+06 | 1.308E+06 | 3.837E+05 | 2.636E+07 | 1.028E+07 | 3.238E+06 |
| PE(18:1/23:0)+H   | PE  | (18:1)  | (23:0) | 7.822E+05 | 6.773E+05 | 0.000E+00 | 3.428E+07 | 6.640E+07 | 1.861E+07 | 1.873E+07 | 3.744E+07 | 3.249E+07 |
| PE(18:1/23:1)+H   | PE  | (18:1)  | (23:1) | 8.736E+05 | 0.000E+00 | 0.000E+00 | 3.481E+06 | 1.288E+07 | 6.678E+06 | 1.010E+07 | 1.231E+07 | 1.095E+07 |
| PE(18:1/24:0)+H   | PE  | (18:1)  | (24:0) | 5.704E+07 | 9.306E+07 | 2.576E+06 | 4.744E+08 | 3.560E+08 | 2.232E+08 | 1.781E+08 | 2.169E+08 | 2.862E+08 |
| PE(20:4/22:6)+H   | PE  | (20:4)  | (22:6) | 2.326E+06 | 1.163E+06 | 1.455E+06 | 1.065E+06 | 1.817E+06 | 1.630E+06 | 7.842E+05 | 6.281E+06 | 4.946E+06 |
| PE(20:4/22:6)+H   | PE  | (20:4)  | (22:6) | 1.252E+07 | 3.185E+06 | 8.178E+03 | 2.169E+06 | 2.793E+06 | 1.035E+07 | 4.515E+06 | 6.746E+06 | 2.016E+06 |
| PE(18:1/24:1)+H   | PE  | (18:1)  | (24:1) | 8.206E+06 | 8.524E+06 | 9.131E+05 | 8.360E+07 | 4.265E+07 | 5.374E+07 | 2.357E+07 | 7.498E+07 | 4.587E+07 |
| PE(24:1/18:0)+H   | PE  | (24:1)  | (18:0) | 1.181E+07 | 1.310E+07 | 1.498E+07 | 9.948E+07 | 4.510E+07 | 4.822E+07 | 3.462E+07 | 5.249E+07 | 4.901E+07 |
| PE(22:0/20:4)+H   | PE  | (22:0)  | (20:4) | 2.803E+06 | 2.012E+06 | 3.650E+06 | 3.857E+07 | 1.996E+07 | 5.234E+06 | 4.578E+06 | 1.988E+07 | 3.166E+07 |
| PE(22:1/20:4)+H   | PE  | (22:1)  | (20:4) | 1.795E+07 | 5.855E+06 | 1.957E+07 | 5.379E+07 | 1.143E+07 | 4.742E+07 | 1.782E+07 | 2.607E+07 | 5.071E+07 |
| PE(20:0p/22:6)+H  | PE  | (20:0p) | (22:6) | 1.524E+08 | 1.334E+08 | 1.384E+08 | 1.036E+08 | 7.540E+07 | 1.217E+08 | 8.614E+07 | 1.406E+08 | 4.262E+07 |
| PE(20:1/22:6)+H   | PE  | (20:1)  | (22:6) | 7.178E+07 | 2.835E+07 | 6.296E+07 | 2.015E+04 | 1.309E+07 | 9.747E+06 | 6.555E+07 | 1.378E+07 | 1.178E+07 |
| PE(20:1/22:6)+H   | PE  | (20:1)  | (22:6) | 4.802E+07 | 1.224E+07 | 8.732E+07 | 3.251E+07 | 2.152E+07 | 3.167E+07 | 3.583E+07 | 2.177E+07 | 5.086E+07 |
| PE(20:1/22:6)+H   | PE  | (20:1)  | (22:6) | 1.391E+07 | 4.044E+06 | 1.342E+06 | 9.634E+06 | 1.693E+07 | 4.240E+06 | 3.099E+06 | 4.228E+06 | 3.343E+07 |
| PE(20:1p/22:6)+H  | PE  | (20:1p) | (22:6) | 2.046E+07 | 1.570E+07 | 1.905E+07 | 5.163E+07 | 4.555E+07 | 4.035E+07 | 6.469E+07 | 3.739E+07 | 4.818E+07 |
| PE(20:1p/22:6)+H  | PE  | (20:1p) | (22:6) | 7.319E+07 | 5.587E+07 | 9.256E+06 | 4.789E+07 | 9.123E+07 | 3.819E+07 | 1.385E+08 | 1.204E+08 | 1.286E+08 |
| PE(20:2/22:6)+H   | PE  | (20:2)  | (22:6) | 3.662E+06 | 7.785E+06 | 9.128E+06 | 5.323E+05 | 2.153E+06 | 2.552E+04 | 9.059E+05 | 2.148E+06 | 6.508E+05 |
| PE(25:0/18:1)+H   | PE  | (25:0)  | (18:1) | 1.976E+05 | 7.168E+05 | 0.000E+00 | 2.580E+06 | 4.209E+06 | 1.447E+06 | 6.645E+05 | 1.429E+06 | 2.696E+06 |
| PE(22:4/22:6)+H   | PE  | (22:4)  | (22:6) | 4.400E+05 | 6.982E+06 | 6.067E+06 | 1.947E+04 | 7.009E+06 | 1.417E+07 | 1.460E+07 | 1.139E+07 | 2.554E+07 |
| PE(22:6/22:6)+H   | PE  | (22:6)  | (22:6) | 1.516E+06 | 2.558E+05 | 1.361E+06 | 1.714E+06 | 5.102E+06 | 1.258E+06 | 2.857E+06 | 1.107E+05 | 3.863E+06 |
| PE(24:0/20:4)+H   | PE  | (24:0)  | (20:4) | 1.327E+07 | 1.576E+06 | 6.475E+06 | 6.935E+07 | 3.545E+07 | 1.190E+07 | 1.548E+07 | 1.307E+08 | 3.548E+07 |
| PE(21:3/24:7)+H   | PE  | (21:3)  | (24:7) | 3.571E+05 | 1.272E+06 | 1.455E+07 | 5.453E+06 | 1.893E+07 | 3.767E+06 | 2.748E+06 | 5.027E+06 | 1.614E+07 |
| PEt(16:0/16:1)+H  | PEt | (16:0)  | (16:1) | 2.635E+03 | 3.204E+05 | 6.598E+03 | 1.308E+07 | 2.017E+07 | 0.000E+00 | 7.024E+05 | 1.737E+06 | 3.211E+05 |
| PEt(16:0/18:1)+H  | PEt | (16:0)  | (18:1) | 3.896E+04 | 1.152E+06 | 4.425E+07 | 2.522E+08 | 4.557E+08 | 2.261E+07 | 3.946E+07 | 7.587E+07 | 8.778E+07 |
| PEt(16:0/18:2)+H  | PEt | (16:0)  | (18:2) | 1.007E+06 | 4.443E+05 | 2.928E+07 | 3.776E+07 | 7.081E+07 | 5.275E+05 | 1.729E+06 | 4.819E+06 | 5.356E+06 |
| PEt(16:1/18:2)+H  | PEt | (16:1)  | (18:2) | 0.000E+00 | 0.000E+00 | 0.000E+00 | 1.426E+06 | 5.127E+06 | 0.000E+00 | 0.000E+00 | 6.002E+05 | 0.000E+00 |
| PEt(16:0/20:3)+H  | PEt | (16:0)  | (20:3) | 5.934E+05 | 0.000E+00 | 4.553E+06 | 6.199E+06 | 1.676E+07 | 0.000E+00 | 0.000E+00 | 2.776E+06 | 5.520E+05 |
| PEt(16:0/20:4)+H  | PEt | (16:0)  | (20:4) | 1.611E+05 | 5.948E+05 | 2.112E+07 | 4.332E+07 | 3.910E+07 | 7.264E+05 | 1.475E+06 | 7.776E+06 | 3.793E+06 |
| PEt(18:1/20:3)+H  | PEt | (18:1)  | (20:3) | 4.987E+05 | 3.461E+05 | 1.540E+06 | 9.568E+05 | 1.053E+07 | 4.100E+06 | 4.073E+05 | 4.531E+06 | 4.096E+06 |
| PG(16:0/16:0)+H   | PG  | (16:0)  | (16:0) | 2.288E+05 | 1.195E+05 | 1.401E+06 | 1.679E+07 | 6.497E+06 | 2.113E+06 | 3.376E+06 | 2.764E+07 | 2.660E+07 |
| PG(18:1/14:0)+H   | PG  | (18:1)  | (14:0) | 0.000E+00 | 0.000E+00 | 0.000E+00 | 8.931E+06 | 3.189E+06 | 5.113E+05 | 2.620E+06 | 5.949E+07 | 2.728E+07 |
| PG(16:0/16:1)+H   | PG  | (16:0)  | (16:1) | 3.183E+05 | 2.791E+06 | 2.064E+06 | 3.844E+07 | 2.989E+07 | 1.341E+07 | 2.352E+07 | 2.831E+07 | 4.275E+07 |
| PG(16:1/16:1)+H   | PG  | (16:1)  | (16:1) | 0.000E+00 | 0.000E+00 | 0.000E+00 | 4.029E+07 | 2.269E+07 | 2.810E+06 | 2.950E+08 | 1.557E+08 | 6.797E+07 |
| PG(16:1/16:1)+H   | PG  | (16:1)  | (16:1) | 0.000E+00 | 0.000E+00 | 0.000E+00 | 3.465E+06 | 1.322E+06 | 8.866E+05 | 5.600E+06 | 4.957E+06 | 1.411E+06 |
| PG(16:1/17:1)+H   | PG  | (16:1)  | (17:1) | 0.000E+00 | 0.000E+00 | 0.000E+00 | 7.457E+05 | 1.066E+06 | 0.000E+00 | 6.339E+05 | 1.740E+07 | 7.335E+06 |
| PG(16:0/18:1)+H   | PG  | (16:0)  | (18:1) | 0.000E+00 | 0.000E+00 | 0.000E+00 | 1.163E+06 | 1.417E+06 | 0.000E+00 | 0.000E+00 | 1.857E+07 | 1.704E+06 |
| PG(16:0/18:1)+NH4 | PG  | (16:0)  | (18:1) | 1.200E+06 | 2.565E+04 | 8.905E+03 | 1.252E+07 | 4.857E+06 | 4.361E+06 | 2.515E+06 | 1.375E+08 | 1.567E+08 |
| PG(16:0/18:1)+H   | PG  | (16:0)  | (18:1) | 2.755E+03 | 3.195E+07 | 6.689E+07 | 3.662E+07 | 1.189E+07 | 4.334E+06 | 1.088E+08 | 1.289E+08 | 1.830E+08 |
| PG(16:0/18:1)+NH4 | PG  | (16:0)  | (18:1) | 1.858E+08 | 1.236E+08 | 9.607E+07 | 6.22      |           |           |           |           |           |

|                   |    |         |        |           |           |           |           |           |           |           |           |           |
|-------------------|----|---------|--------|-----------|-----------|-----------|-----------|-----------|-----------|-----------|-----------|-----------|
| PG(16:1/20:4)-H   | PG | (16:1)  | (20:4) | 5.611E+05 | 0.000E+00 | 0.000E+00 | 4.644E+07 | 5.065E+07 | 2.673E+05 | 1.520E+08 | 1.142E+08 | 7.908E+07 |
| PG(15:0/22:6)-H   | PG | (15:0)  | (22:6) | 1.439E+05 | 0.000E+00 | 0.000E+00 | 1.950E+05 | 0.000E+00 | 0.000E+00 | 0.000E+00 | 5.240E+06 | 3.899E+07 |
| PG(20:1/18:1)-H   | PG | (20:1)  | (18:1) | 5.960E+05 | 7.083E+06 | 9.788E+06 | 2.124E+07 | 2.137E+07 | 8.936E+06 | 6.665E+07 | 7.128E+07 | 8.427E+07 |
| PG(18:1/20:2)-H   | PG | (18:1)  | (20:2) | 5.701E+03 | 0.000E+00 | 1.656E+05 | 6.859E+07 | 3.384E+07 | 6.090E+06 | 2.673E+06 | 1.457E+08 | 7.839E+07 |
| PG(18:1/20:3)-H   | PG | (18:1)  | (20:3) | 1.393E+03 | 0.000E+00 | 0.000E+00 | 3.323E+07 | 4.431E+07 | 8.976E+06 | 6.406E+07 | 1.780E+08 | 1.037E+08 |
| PG(18:1/20:3)+NH4 | PG | (18:1)  | (20:3) | 1.646E+06 | 0.000E+00 | 0.000E+00 | 1.470E+07 | 2.006E+07 | 4.943E+07 | 1.352E+07 | 6.417E+07 | 4.059E+07 |
| PG(18:0/20:4)-H   | PG | (18:0)  | (20:4) | 3.450E+06 | 9.593E+05 | 4.040E+05 | 1.114E+07 | 1.232E+06 | 5.246E+06 | 8.998E+05 | 8.018E+06 | 3.966E+06 |
| PG(18:1/20:4)-H   | PG | (18:1)  | (20:4) | 5.901E+06 | 2.791E+05 | 3.126E+06 | 6.948E+07 | 5.871E+07 | 1.633E+07 | 3.476E+07 | 1.602E+08 | 1.269E+08 |
| PG(18:1/20:4)+NH4 | PG | (18:1)  | (20:4) | 2.101E+07 | 9.737E+06 | 2.126E+08 | 5.931E+07 | 1.148E+08 | 1.880E+08 | 4.104E+07 | 2.386E+08 | 1.710E+08 |
| PG(18:1/20:4)+H   | PG | (18:1)  | (20:4) | 1.568E+06 | 4.531E+05 | 8.730E+05 | 3.035E+05 | 0.000E+00 | 3.406E+05 | 2.017E+06 | 9.960E+06 | 3.264E+05 |
| PG(18:1/20:4)-H   | PG | (18:1)  | (20:4) | 2.990E+06 | 1.854E+06 | 1.537E+06 | 5.217E+07 | 4.828E+07 | 2.885E+07 | 8.076E+07 | 1.546E+08 | 1.182E+08 |
| PG(18:2/20:4)-H   | PG | (18:2)  | (20:4) | 6.203E+07 | 3.757E+07 | 4.288E+07 | 8.205E+08 | 6.413E+08 | 3.348E+08 | 5.556E+08 | 1.152E+09 | 1.034E+09 |
| PG(16:0/22:6)+NH4 | PG | (16:0)  | (22:6) | 7.824E+06 | 6.950E+06 | 2.431E+08 | 3.346E+08 | 4.658E+08 | 4.362E+08 | 2.174E+08 | 3.416E+08 | 1.674E+09 |
| PG(16:0/22:6)-H   | PG | (16:0)  | (22:6) | 1.161E+07 | 1.624E+07 | 8.761E+06 | 1.198E+08 | 1.993E+08 | 5.424E+07 | 4.542E+08 | 5.234E+08 | 6.292E+08 |
| PG(16:1/22:6)-H   | PG | (16:1)  | (22:6) | 1.006E+06 | 1.686E+06 | 3.758E+05 | 3.495E+07 | 4.917E+07 | 1.786E+07 | 1.200E+08 | 1.439E+08 | 1.423E+08 |
| PG(16:1/22:6)+NH4 | PG | (16:1)  | (22:6) | 1.103E+06 | 1.449E+05 | 1.012E+06 | 2.602E+07 | 4.162E+07 | 4.804E+07 | 6.646E+07 | 1.624E+08 | 1.860E+08 |
| PG(17:1/22:6)-H   | PG | (17:1)  | (22:6) | 0.000E+00 | 0.000E+00 | 0.000E+00 | 3.688E+07 | 5.745E+07 | 2.136E+07 | 3.563E+07 | 1.702E+08 | 3.349E+08 |
| PG(18:1/22:4)+NH4 | PG | (18:1)  | (22:4) | 2.844E+06 | 0.000E+00 | 3.549E+04 | 1.602E+07 | 2.463E+06 | 4.663E+06 | 2.915E+06 | 2.916E+07 | 1.427E+07 |
| PG(18:1/22:5)-H   | PG | (18:1)  | (22:5) | 6.656E+06 | 7.867E+06 | 1.441E+07 | 2.076E+07 | 1.440E+08 | 4.585E+07 | 2.356E+08 | 4.940E+08 | 2.069E+08 |
| PG(18:1/22:5)+H   | PG | (18:1)  | (22:5) | 6.234E+05 | 3.642E+06 | 2.886E+05 | 1.122E+07 | 5.867E+06 | 2.942E+07 | 4.091E+07 | 8.436E+07 | 4.117E+07 |
| PG(18:1/22:6)-H   | PG | (18:1)  | (22:6) | 8.040E+07 | 3.716E+07 | 9.166E+07 | 7.952E+08 | 1.083E+09 | 3.953E+08 | 1.209E+09 | 2.968E+09 | 3.263E+09 |
| PG(18:1/22:6)+NH4 | PG | (18:1)  | (22:6) | 1.085E+08 | 2.650E+07 | 2.389E+08 | 7.136E+08 | 9.536E+08 | 1.177E+09 | 1.306E+09 | 2.182E+09 | 2.325E+09 |
| PG(18:1/22:6)+H   | PG | (18:1)  | (22:6) | 5.363E+05 | 5.313E+05 | 2.802E+05 | 7.420E+07 | 4.239E+07 | 2.612E+07 | 1.408E+08 | 2.397E+08 | 7.301E+07 |
| PG(18:1/22:6)-H   | PG | (18:1)  | (22:6) | 8.247E+07 | 1.322E+08 | 1.338E+08 | 1.011E+09 | 1.321E+09 | 3.819E+08 | 1.169E+09 | 3.156E+09 | 3.464E+09 |
| PG(18:1/22:6)+NH4 | PG | (18:1)  | (22:6) | 1.056E+08 | 4.130E+07 | 2.389E+08 | 7.445E+08 | 9.560E+08 | 1.177E+09 | 1.566E+09 | 2.215E+09 | 2.322E+09 |
| PG(18:2/22:6)-H   | PG | (18:2)  | (22:6) | 4.186E+08 | 7.996E+08 | 6.962E+08 | 1.143E+09 | 1.401E+09 | 4.920E+08 | 2.515E+09 | 2.248E+09 | 2.538E+09 |
| PG(18:2/22:6)+NH4 | PG | (18:2)  | (22:6) | 3.844E+05 | 3.705E+08 | 3.509E+07 | 3.364E+08 | 3.415E+08 | 1.373E+08 | 4.486E+08 | 5.245E+08 | 1.405E+09 |
| PG(18:2/22:6)+H   | PG | (18:2)  | (22:6) | 8.841E+05 | 1.122E+06 | 2.016E+06 | 2.067E+06 | 8.749E+06 | 2.063E+06 | 2.557E+06 | 2.037E+07 | 2.096E+07 |
| PG(18:3/22:6)-H   | PG | (18:3)  | (22:6) | 4.649E+05 | 9.571E+05 | 8.652E+05 | 8.089E+05 | 2.873E+06 | 1.737E+06 | 1.929E+06 | 5.113E+05 | 1.116E+07 |
| PG(20:4/22:6)-H   | PG | (20:4)  | (22:6) | 7.293E+07 | 4.490E+07 | 5.617E+07 | 2.766E+07 | 8.139E+07 | 7.512E+07 | 1.001E+08 | 1.731E+08 | 1.261E+08 |
| PG(20:4/22:6)+NH4 | PG | (20:4)  | (22:6) | 2.143E+08 | 2.829E+07 | 5.091E+07 | 6.228E+07 | 9.696E+07 | 4.265E+07 | 2.134E+08 | 1.636E+08 | 1.934E+08 |
| PG(20:4/22:6)-H   | PG | (20:4)  | (22:6) | 4.108E+07 | 9.132E+07 | 4.633E+07 | 8.679E+07 | 1.103E+08 | 4.886E+07 | 2.915E+08 | 1.154E+08 | 1.024E+08 |
| PG(20:5/22:6)-H   | PG | (20:5)  | (22:6) | 5.063E+07 | 2.325E+07 | 5.810E+07 | 1.338E+07 | 3.330E+07 | 2.464E+07 | 5.675E+07 | 9.186E+07 | 1.864E+08 |
| PG(20:5/22:6)+NH4 | PG | (20:5)  | (22:6) | 2.184E+07 | 9.093E+06 | 1.322E+07 | 9.252E+06 | 1.344E+07 | 1.609E+07 | 1.906E+07 | 1.654E+07 | 5.725E+07 |
| PG(20:1/22:6)-H   | PG | (20:1)  | (22:6) | 0.000E+00 | 9.957E+03 | 1.747E+05 | 4.208E+06 | 4.760E+06 | 1.183E+06 | 2.949E+07 | 6.558E+07 | 5.367E+07 |
| PG(20:1/22:6)+NH4 | PG | (20:1)  | (22:6) | 0.000E+00 | 0.000E+00 | 0.000E+00 | 3.048E+06 | 1.913E+05 | 1.480E+06 | 1.503E+06 | 2.877E+07 | 2.585E+07 |
| PG(22:4/20:4)-H   | PG | (22:4)  | (20:4) | 6.380E+06 | 1.602E+06 | 2.147E+06 | 8.174E+07 | 5.780E+07 | 2.980E+06 | 4.160E+06 | 7.711E+07 | 4.310E+07 |
| PG(22:4/20:4)+NH4 | PG | (22:4)  | (20:4) | 8.640E+06 | 6.634E+06 | 7.357E+06 | 7.813E+06 | 7.858E+06 | 1.317E+07 | 4.838E+07 | 9.350E+07 | 4.472E+07 |
| PG(20:3/22:6)-H   | PG | (20:3)  | (22:6) | 4.685E+08 | 2.127E+08 | 4.290E+08 | 7.702E+08 | 8.915E+08 | 1.141E+08 | 1.611E+09 | 1.562E+09 | 2.047E+09 |
| PG(20:3/22:6)+NH4 | PG | (20:3)  | (22:6) | 5.270E+07 | 1.271E+07 | 3.551E+07 | 5.897E+07 | 8.564E+07 | 1.839E+07 | 4.935E+07 | 8.590E+07 | 7.520E+07 |
| PG(22:4/22:6)-H   | PG | (22:4)  | (22:6) | 1.465E+08 | 9.268E+07 | 1.492E+08 | 3.201E+08 | 2.919E+08 | 1.689E+08 | 3.063E+08 | 5.271E+08 | 4.855E+08 |
| PG(22:4/22:6)+NH4 | PG | (22:4)  | (22:6) | 6.337E+07 | 5.496E+07 | 5.172E+07 | 8.434E+07 | 5.309E+07 | 1.784E+08 | 1.074E+08 | 1.439E+08 | 6.957E+07 |
| PG(22:4/22:6)+H   | PG | (22:4)  | (22:6) | 2.141E+06 | 0.000E+00 | 5.199E+05 | 3.636E+06 | 8.211E+05 | 2.824E+06 | 1.751E+06 | 3.482E+06 | 2.844E+06 |
| PG(22:4/22:6)+NH4 | PG | (22:4)  | (22:6) | 1.750E+06 | 5.771E+07 | 4.747E+07 | 1.675E+08 | 1.840E+05 | 3.221E+07 | 1.074E+08 | 3.026E+06 | 1.520E+06 |
| PG(22:5/22:6)-H   | PG | (22:5)  | (22:6) | 1.065E+08 | 4.058E+08 | 2.018E+08 | 2.845E+07 | 8.563E+07 | 6.781E+07 | 7.361E+08 | 1.303E+09 | 1.394E+08 |
| PG(22:5/22:6)+NH4 | PG | (22:5)  | (22:6) | 1.247E+08 | 1.206E+08 | 2.522E+08 | 3.749E+07 | 8.772E+07 | 5.120E+07 | 1.481E+08 | 1.398E+08 | 1.262E+08 |
| PG(22:5/22:6)+H   | PG | (22:5)  | (22:6) | 2.516E+06 | 5.061E+06 | 1.355E+06 | 1.057E+06 | 8.748E+05 | 3.922E+05 | 1.126E+07 | 5.713E+06 | 1.480E+07 |
| PG(22:5/22:6)-H   | PG | (22:5)  | (22:6) | 4.695E+08 | 3.597E+08 | 8.157E+08 | 8.465E+08 | 8.695E+08 | 6.511E+08 | 7.723E+08 | 1.168E+09 | 1.427E+09 |
| PG(22:5/22:6)+NH4 | PG | (22:5)  | (22:6) | 3.215E+07 | 1.294E+08 | 5.334E+07 | 3.372E+07 | 4.477E+06 | 5.718E+07 | 2.034E+08 | 1.234E+07 | 2.599E+07 |
| PG(22:6/22:6)-H   | PG | (22:6)  | (22:6) | 2.090E+09 | 7.489E+08 | 1.404E+09 | 4.966E+08 | 7.201E+08 | 2.126E+08 | 9.898E+08 | 1.199E+09 | 1.510E+09 |
| PG(22:6/22:6)+NH4 | PG | (22:6)  | (22:6) | 8.684E+08 | 9.947E+08 | 2.214E+09 | 3.444E+08 | 1.163E+09 | 6.474E+08 | 9.127E+08 | 1.770E+09 | 1.565E+09 |
| PG(22:6/22:6)+H   | PG | (22:6)  | (22:6) | 4.289E+07 | 8.777E+07 | 9.047E+07 | 1.853E+07 | 8.333E+07 | 4.692E+07 | 5.209E+07 | 1.484E+08 | 1.444E+08 |
| PG(22:4/22:5)-H   | PG | (22:4)  | (22:5) | 2.312E+05 | 1.627E+05 | 2.354E+05 | 1.172E+07 | 2.712E+06 | 1.345E+06 | 3.905E+06 | 1.346E+07 | 3.775E+06 |
| PI(16:0/14:0)-H   | PI | (16:0)  | (14:0) | 2.093E+07 | 5.998E+06 | 7.598E+06 | 5.491E+07 | 4.300E+07 | 1.211E+07 | 5.847E+07 | 1.209E+08 | 2.185E+08 |
| PI(16:0/14:0)-H   | PI | (16:0)  | (14:0) | 1.153E+06 | 4.370E+05 | 1.100E+06 | 1.736E+07 | 4.591E+06 | 1.934E+06 | 3.373E+06 | 7.077E+07 | 2.437E+07 |
| PI(16:1/14:0)-H   | PI | (16:1)  | (14:0) | 0.000E+00 | 0.000E+00 | 0.000E+00 | 2.053E+06 | 7.961E+05 | 2.501E+05 | 2.607E+06 | 4.645E+06 | 7.959E+06 |
| PI(16:0/15:0)-H   | PI | (16:0)  | (15:0) | 1.143E+07 | 2.511E+06 | 9.385E+06 | 1.365E+07 | 1.767E+07 | 5.719E+06 | 2.201E+07 | 5.770E+07 | 1.364E+08 |
| PI(18:0/14:0)-H   | PI | (18:0)  | (14:0) | 0.000E+00 | 7.439E+04 | 0.000E+00 | 8.989E+04 | 1.883E+05 | 1.527E+05 | 1.035E+05 | 2.355E+05 | 1.326E+06 |
| PI(16:0/16:0)-H   | PI | (16:0)  | (16:0) | 4.288E+08 | 1.428E+08 | 2.584E+08 | 9.179E+08 | 7.968E+08 | 3.625E+08 | 7.203E+08 | 2.035E+09 | 2.387E+09 |
| PI(16:0/16:0)+NH4 | PI | (16:0)  | (16:0) | 3.111E+05 | 2.917E+06 | 2.001E+06 | 3.109E+07 | 1.254E+07 | 1.266E+07 | 6.195E+07 | 9.838E+07 | 8.204E+07 |
| PI(18:0/14:0)-H   | PI | (18:0)  | (14:0) | 2.516E+05 | 6.665E+03 | 4.313E+05 | 1.629E+06 | 1.597E+06 | 1.228E+05 | 4.416E+05 | 4.375E+06 | 1.099E+06 |
| PI(16:0E/16:0)-H  | PI | (16:0E) | (16:0) | 2.678E+05 | 3.347E+06 | 2.252E+05 | 1.420E+08 | 7.956E+07 | 1.629E+07 | 1.180E+08 | 7.245E+08 | 7.317E+08 |
| PI(16:0/16:1)-H   | PI | (16:0)  | (16:1) | 1.732E+08 | 1.063E+08 | 1.550E+08 | 5.698E+08 | 6.897E+08 | 2.665E+08 | 5.946E+08 | 8.278E+08 | 9.004E+08 |
| PI(16:0/16:1)+NH4 | PI | (16:0)  | (16:1) | 4.830E+07 | 2.020E+07 | 4.713E+07 | 1.393E+08 | 2.974E+08 | 1.076E+08 | 5.105E+08 | 3.967E+08 | 3.645E+08 |
| PI(16:0P/16:1)-H  | PI | (16:0P) | (16:1) | 2.368E+07 | 9.754E+06 | 3.704E+07 | 6.367E+06 | 3.442E+07 | 1.994E+07 | 2.326E+07 | 1.575E+07 | 8.640E+06 |
| PI(16:1/16:1)-H   | PI | (16:1)  | (16:1) | 0.000E+00 | 3.270E+05 | 1.943E+06 | 5.813E+06 | 2.422E+06 | 1.111E+06 | 3.076E+07 | 3.141E+07 | 2.139E+07 |
| PI(16:0/17:0)-H   | PI | (16:0)  | (17:0) | 1.763E+06 | 1.282E+06 | 5.179E+07 | 1.902E+06 | 3.445E+06 | 0.000E+00 | 2.243E+06 | 4.089E+07 | 2.279E+07 |
| PI(15:0/18:1)-H   | PI | (15:0)  | (18:1) | 6.431E+07 | 1.566E+07 | 2.179E+07 | 1.151E+07 | 3.195E+07 | 1.606E+07 | 2.498E+07 | 1.268E+08 | 1.482E+08 |
| PI(15:0/18:1)-H   | PI | (15:0)  | (18:1) | 1.026E+06 | 1.187E+07 | 6.348E+05 | 7.365E+05 | 5.975E+05 | 3.891E+03 | 9.458E+06 | 1.384E+06 | 1.648E+06 |
| PI(15:0/18:2)-H   | PI | (15:0)  | (18:2) | 7.488E+06 | 1.136E+07 | 8.648E+06 | 2.179E+07 | 5.252E+06 | 5.290E+06 | 3.608E+07 | 3.700E+07 | 4.118E+07 |
| PI(18:0/16:0)-H   | PI | (18:0)  | (16:0) | 1.652E+08 | 8.620E+06 | 1.170E+07 | 4.447E+08 | 1.761E+08 | 1.660E+08 | 2.864E+07 | 7.189E+08 | 5.941E+08 |
| PI(18:0/16:0)+NH4 | PI | (18:0)  | (16:0) | 2.189E+06 | 0.000E+00 | 1.021E+06 | 3.291E+06 | 4.989E+06 | 1.679     |           |           |           |

|                   |    |         |        |           |           |           |           |           |           |           |           |           |
|-------------------|----|---------|--------|-----------|-----------|-----------|-----------|-----------|-----------|-----------|-----------|-----------|
| PI(18:1/18:1)-H   | PI | (18:1)  | (18:1) | 2.419E+07 | 1.425E+08 | 3.060E+08 | 7.481E+08 | 6.587E+08 | 4.371E+08 | 5.055E+08 | 8.663E+08 | 7.404E+08 |
| PI(18:0/18:2)-H   | PI | (18:0)  | (18:2) | 4.321E+08 | 9.979E+07 | 2.004E+08 | 4.211E+08 | 4.935E+08 | 2.552E+08 | 3.502E+08 | 3.686E+08 | 3.051E+08 |
| PI(16:0/20:3)-H   | PI | (16:0)  | (20:3) | 1.133E+09 | 4.441E+08 | 6.147E+08 | 6.272E+08 | 6.716E+08 | 5.002E+08 | 4.367E+08 | 6.311E+08 | 5.773E+08 |
| PI(16:0/20:3)+NH4 | PI | (16:0)  | (20:3) | 1.623E+08 | 2.107E+08 | 1.112E+08 | 1.212E+08 | 5.124E+08 | 4.051E+08 | 3.646E+08 | 8.086E+08 | 6.668E+08 |
| PI(16:0/20:3)+NH4 | PI | (16:0)  | (20:3) | 4.516E+08 | 2.793E+06 | 3.691E+04 | 1.303E+06 | 2.079E+06 | 1.670E+04 | 2.318E+06 | 1.938E+06 | 2.232E+08 |
| PI(18:4/18:0)-H   | PI | (18:4)  | (18:0) | 0.000E+00 | 0.000E+00 | 1.928E+03 | 0.000E+00 | 2.314E+05 | 1.258E+06 | 0.000E+00 | 0.000E+00 | 1.148E+06 |
| PI(16:0/20:4)-H   | PI | (16:0)  | (20:4) | 2.278E+09 | 9.947E+08 | 1.522E+09 | 1.334E+09 | 1.071E+09 | 6.824E+08 | 1.046E+09 | 1.508E+09 | 1.438E+09 |
| PI(16:0/20:4)+NH4 | PI | (16:0)  | (20:4) | 1.156E+05 | 2.226E+06 | 6.900E+08 | 5.037E+08 | 6.059E+08 | 2.786E+08 | 1.104E+09 | 1.322E+09 | 6.040E+08 |
| PI(16:0/20:4)+NH4 | PI | (16:0)  | (20:4) | 2.023E+09 | 9.409E+08 | 4.823E+09 | 1.267E+09 | 6.059E+08 | 9.779E+08 | 1.104E+09 | 1.321E+09 | 1.184E+09 |
| PI(16:0/20:4)+H   | PI | (16:0)  | (20:4) | 4.061E+08 | 7.263E+07 | 7.966E+07 | 8.176E+07 | 4.590E+07 | 4.400E+07 | 1.310E+08 | 5.442E+07 | 1.719E+08 |
| PI(16:0e/20:4)-H  | PI | (16:0e) | (20:4) | 6.063E+05 | 4.799E+06 | 9.173E+05 | 1.615E+06 | 2.748E+06 | 1.967E+06 | 2.870E+06 | 1.565E+07 | 2.373E+07 |
| PI(16:1/20:4)-H   | PI | (16:1)  | (20:4) | 9.413E+06 | 6.130E+06 | 8.759E+06 | 1.733E+07 | 1.218E+07 | 5.557E+06 | 3.211E+07 | 2.478E+07 | 7.371E+06 |
| PI(16:1/20:4)+NH4 | PI | (16:1)  | (20:4) | 1.348E+07 | 2.165E+05 | 1.861E+06 | 1.653E+06 | 1.166E+06 | 1.108E+06 | 1.363E+07 | 5.315E+06 | 3.947E+06 |
| PI(16:0/20:5)-H   | PI | (16:0)  | (20:5) | 7.805E+07 | 6.601E+07 | 6.805E+07 | 2.042E+07 | 3.106E+07 | 1.737E+07 | 4.831E+07 | 5.150E+07 | 6.964E+07 |
| PI(16:0/20:5)+NH4 | PI | (16:0)  | (20:5) | 7.501E+07 | 3.286E+07 | 1.464E+07 | 3.024E+07 | 3.134E+07 | 7.473E+06 | 7.355E+07 | 5.176E+07 | 1.072E+08 |
| PI(14:0/22:6)-H   | PI | (14:0)  | (22:6) | 0.000E+00 | 0.000E+00 | 2.384E+03 | 1.159E+06 | 1.100E+06 | 8.394E+05 | 1.435E+07 | 1.576E+06 | 1.380E+07 |
| PI(16:0/21:0)-H   | PI | (16:0)  | (21:0) | 2.374E+08 | 1.116E+08 | 1.883E+08 | 7.375E+07 | 3.796E+07 | 4.738E+07 | 5.218E+07 | 4.578E+07 | 3.937E+07 |
| PI(19:0/18:2)-H   | PI | (19:0)  | (18:2) | 9.813E+07 | 7.566E+07 | 8.760E+07 | 1.096E+08 | 9.751E+07 | 7.981E+07 | 7.114E+07 | 1.380E+08 | 1.113E+08 |
| PI(17:0/20:4)-H   | PI | (17:0)  | (20:4) | 2.863E+06 | 9.513E+06 | 1.589E+06 | 1.655E+07 | 2.016E+06 | 8.316E+06 | 6.391E+06 | 8.889E+06 | 1.197E+07 |
| PI(17:0/20:4)-H   | PI | (17:0)  | (20:4) | 1.406E+07 | 3.291E+07 | 1.944E+07 | 8.438E+06 | 1.473E+07 | 9.337E+06 | 4.268E+06 | 8.436E+05 | 1.042E+07 |
| PI(15:0/22:5)-H   | PI | (15:0)  | (22:5) | 2.918E+06 | 2.200E+06 | 1.219E+06 | 2.594E+05 | 4.609E+05 | 5.428E+05 | 7.032E+05 | 8.888E+05 | 1.709E+06 |
| PI(15:0/22:6)-H   | PI | (15:0)  | (22:6) | 2.700E+07 | 3.122E+07 | 2.826E+07 | 1.267E+07 | 6.399E+06 | 2.214E+05 | 2.517E+07 | 6.365E+06 | 4.395E+07 |
| PI(15:0/22:6)+NH4 | PI | (15:0)  | (22:6) | 4.328E+07 | 3.667E+07 | 2.056E+07 | 5.570E+05 | 2.949E+06 | 2.823E+05 | 1.087E+07 | 9.697E+06 | 1.275E+07 |
| PI(18:0/20:1)-H   | PI | (18:0)  | (20:1) | 0.000E+00 | 0.000E+00 | 0.000E+00 | 1.654E+07 | 8.793E+06 | 4.087E+06 | 5.235E+06 | 1.612E+07 | 7.113E+06 |
| PI(20:1/18:1)-H   | PI | (20:1)  | (18:1) | 5.612E+05 | 6.551E+03 | 1.253E+07 | 6.259E+07 | 1.238E+07 | 2.971E+06 | 4.629E+07 | 8.579E+07 | 4.800E+07 |
| PI(20:2/18:1)-H   | PI | (20:1)  | (18:1) | 7.243E+06 | 3.068E+06 | 3.491E+06 | 6.887E+07 | 2.101E+07 | 1.426E+07 | 9.577E+07 | 1.011E+08 | 3.866E+07 |
| PI(18:0/20:3)-H   | PI | (18:0)  | (20:3) | 6.550E+08 | 3.136E+08 | 4.555E+08 | 1.145E+09 | 4.061E+08 | 7.188E+08 | 5.913E+08 | 1.105E+09 | 3.245E+08 |
| PI(20:1/18:2)-H   | PI | (20:1)  | (18:2) | 8.919E+06 | 2.899E+07 | 1.817E+07 | 1.150E+08 | 3.026E+07 | 1.000E+07 | 3.370E+07 | 3.417E+07 | 1.510E+07 |
| PI(18:1/20:3)-H   | PI | (18:1)  | (20:3) | 1.301E+08 | 6.901E+07 | 8.640E+07 | 2.971E+07 | 1.224E+08 | 2.240E+07 | 1.268E+08 | 1.194E+08 | 3.948E+07 |
| PI(18:1/20:3)+NH4 | PI | (18:1)  | (20:3) | 3.254E+07 | 1.161E+07 | 4.025E+07 | 1.124E+08 | 7.888E+07 | 5.791E+07 | 2.866E+07 | 1.077E+08 | 7.682E+07 |
| PI(18:0/20:4)-H   | PI | (18:0)  | (20:4) | 1.999E+09 | 5.936E+08 | 1.000E+09 | 3.252E+09 | 1.852E+09 | 2.408E+09 | 1.249E+09 | 3.408E+09 | 1.723E+09 |
| PI(18:0/20:4)+NH4 | PI | (18:0)  | (20:4) | 1.190E+09 | 3.844E+08 | 8.089E+08 | 3.617E+08 | 4.383E+08 | 9.069E+07 | 1.148E+09 | 1.786E+09 | 3.122E+08 |
| PI(18:0/20:4)+H   | PI | (18:0)  | (20:4) | 3.249E+07 | 1.756E+06 | 1.451E+07 | 5.538E+07 | 4.096E+07 | 2.396E+07 | 2.666E+07 | 4.555E+07 | 2.182E+07 |
| PI(18:0/20:4)+NH4 | PI | (18:0)  | (20:4) | 7.131E+08 | 7.184E+07 | 1.300E+08 | 7.114E+08 | 1.419E+08 | 1.662E+08 | 1.32E+08  | 2.141E+08 | 3.621E+08 |
| PI(18:0e/20:4)-H  | PI | (18:0e) | (20:4) | 8.780E+06 | 3.128E+07 | 3.116E+05 | 4.859E+03 | 6.179E+03 | 6.257E+03 | 5.907E+06 | 3.233E+06 | 1.786E+07 |
| PI(18:0e/20:4)+H  | PI | (18:0e) | (20:4) | 7.205E+06 | 3.600E+06 | 3.915E+04 | 1.031E+07 | 2.061E+07 | 9.434E+06 | 4.473E+06 | 6.384E+07 | 1.488E+07 |
| PI(18:0p/20:4)-H  | PI | (18:0p) | (20:4) | 4.053E+05 | 3.608E+05 | 9.890E+05 | 2.859E+05 | 1.749E+07 | 5.341E+06 | 8.000E+06 | 2.558E+07 | 7.771E+07 |
| PI(18:0p/20:4)+H  | PI | (18:0p) | (20:4) | 3.714E+06 | 9.053E+06 | 3.491E+06 | 5.289E+06 | 3.891E+07 | 2.395E+07 | 2.129E+07 | 1.311E+08 | 1.620E+08 |
| PI(18:1/20:4)-H   | PI | (18:1)  | (20:4) | 9.235E+08 | 3.851E+08 | 5.485E+08 | 7.769E+08 | 5.357E+08 | 3.898E+08 | 5.911E+08 | 7.677E+08 | 5.739E+08 |
| PI(18:1/20:4)+NH4 | PI | (18:1)  | (20:4) | 9.180E+08 | 4.553E+08 | 5.742E+08 | 7.536E+08 | 5.313E+08 | 5.183E+08 | 7.255E+08 | 5.303E+08 | 5.914E+08 |
| PI(18:1/20:4)+H   | PI | (18:1)  | (20:4) | 6.113E+06 | 7.059E+06 | 1.286E+07 | 1.372E+07 | 1.230E+07 | 6.507E+06 | 2.511E+07 | 6.249E+07 | 3.142E+07 |
| PI(16:0e/22:5)-H  | PI | (16:0e) | (22:5) | 3.714E+06 | 2.027E+06 | 3.491E+06 | 6.079E+05 | 5.394E+07 | 2.395E+07 | 2.129E+07 | 1.507E+08 | 1.514E+08 |
| PI(18:2/20:4)-H   | PI | (18:2)  | (20:4) | 2.862E+05 | 3.104E+05 | 0.000E+00 | 0.000E+00 | 0.000E+00 | 5.836E+05 | 6.430E+05 | 2.560E+05 | 6.095E+06 |
| PI(18:2/20:4)-H   | PI | (18:2)  | (20:4) | 3.355E+07 | 1.720E+07 | 4.685E+06 | 1.496E+07 | 7.238E+06 | 1.957E+07 | 1.826E+07 | 3.346E+07 | 1.005E+07 |
| PI(18:2/20:4)+NH4 | PI | (18:2)  | (20:4) | 3.857E+07 | 2.235E+07 | 4.447E+07 | 1.642E+07 | 2.347E+07 | 3.347E+07 | 4.336E+07 | 5.840E+07 | 3.685E+07 |
| PI(16:0/22:6)-H   | PI | (16:0)  | (22:6) | 2.043E+09 | 9.940E+08 | 1.345E+09 | 6.437E+08 | 1.095E+09 | 5.056E+08 | 1.240E+09 | 1.351E+09 | 1.576E+09 |
| PI(16:0/22:6)+NH4 | PI | (16:0)  | (22:6) | 1.919E+09 | 8.471E+08 | 1.134E+09 | 4.283E+08 | 9.124E+08 | 4.597E+08 | 1.048E+09 | 1.093E+09 | 1.615E+09 |
| PI(16:0/22:6)+H   | PI | (16:0)  | (22:6) | 1.301E+08 | 3.510E+07 | 1.016E+08 | 5.197E+07 | 3.550E+07 | 1.438E+07 | 8.242E+07 | 4.538E+07 | 1.694E+07 |
| PI(16:0/22:6)+H   | PI | (16:0)  | (22:6) | 2.772E+07 | 2.311E+07 | 7.226E+06 | 3.147E+07 | 2.923E+05 | 7.591E+06 | 1.818E+07 | 3.834E+06 | 1.380E+07 |
| PI(16:0e/22:6)-H  | PI | (16:0e) | (22:6) | 3.416E+07 | 3.937E+06 | 2.377E+07 | 1.207E+08 | 1.525E+08 | 7.696E+07 | 1.164E+08 | 2.780E+08 | 4.782E+08 |
| PI(16:0e/22:6)-H  | PI | (16:0e) | (22:6) | 1.505E+07 | 2.499E+06 | 5.394E+06 | 7.355E+07 | 1.345E+08 | 6.916E+06 | 5.809E+07 | 2.224E+08 | 2.499E+08 |
| PI(16:0p/22:6)-H  | PI | (16:0p) | (22:6) | 1.255E+04 | 0.000E+00 | 9.510E+03 | 6.223E+05 | 2.034E+06 | 5.563E+05 | 4.641E+06 | 5.103E+06 | 1.410E+07 |
| PI(16:1/22:6)-H   | PI | (16:1)  | (22:6) | 1.971E+04 | 5.240E+05 | 1.105E+04 | 2.264E+06 | 8.218E+06 | 3.076E+06 | 1.128E+07 | 8.763E+06 | 4.375E+06 |
| PI(20:5/18:2)-H   | PI | (20:5)  | (18:2) | 3.801E+06 | 1.582E+06 | 2.447E+06 | 0.000E+00 | 4.990E+05 | 2.088E+05 | 8.118E+06 | 8.017E+05 | 2.133E+05 |
| PI(19:0/20:4)-H   | PI | (19:0)  | (20:4) | 2.056E+07 | 4.077E+06 | 3.545E+06 | 1.396E+06 | 7.855E+06 | 1.460E+06 | 2.478E+04 | 8.086E+06 | 9.954E+06 |
| PI(19:1/20:4)-H   | PI | (19:1)  | (20:4) | 5.595E+06 | 5.907E+04 | 3.074E+06 | 6.195E+05 | 0.000E+00 | 3.669E+05 | 6.329E+05 | 4.745E+05 | 1.161E+04 |
| PI(18:0/22:4)-H   | PI | (18:0)  | (22:4) | 3.739E+07 | 7.909E+06 | 7.592E+06 | 3.304E+07 | 2.326E+07 | 5.932E+07 | 3.405E+07 | 8.081E+07 | 5.180E+07 |
| PI(18:0/22:4)-H   | PI | (18:0)  | (22:4) | 3.950E+06 | 4.172E+05 | 3.503E+03 | 7.606E+06 | 4.285E+05 | 3.009E+06 | 1.176E+06 | 1.344E+06 | 1.034E+06 |
| PI(18:0/22:5)-H   | PI | (18:0)  | (22:5) | 1.749E+08 | 3.070E+07 | 4.754E+07 | 9.435E+07 | 6.048E+07 | 6.277E+07 | 1.448E+07 | 5.601E+07 | 1.797E+08 |
| PI(18:0/22:5)-H   | PI | (18:0)  | (22:5) | 1.749E+08 | 1.659E+07 | 4.912E+06 | 1.220E+07 | 2.356E+08 | 1.197E+07 | 1.562E+07 | 1.592E+07 | 4.624E+07 |
| PI(20:1/20:4)-H   | PI | (20:1)  | (20:4) | 3.898E+07 | 4.356E+06 | 1.835E+07 | 1.296E+07 | 7.548E+06 | 5.974E+06 | 4.515E+07 | 1.595E+06 | 1.561E+06 |
| PI(18:1/22:5)-H   | PI | (18:1)  | (22:5) | 5.691E+07 | 1.433E+07 | 4.580E+07 | 1.166E+07 | 2.389E+07 | 1.269E+07 | 1.104E+07 | 3.165E+07 | 1.002E+07 |
| PI(18:1/22:5)+NH4 | PI | (18:1)  | (22:5) | 1.601E+07 | 1.385E+07 | 7.147E+06 | 1.580E+04 | 1.600E+06 | 6.459E+06 | 1.669E+07 | 8.880E+06 | 5.433E+06 |
| PI(18:0/22:6)-H   | PI | (18:0)  | (22:6) | 2.623E+08 | 3.253E+07 | 1.169E+08 | 2.377E+08 | 4.165E+08 | 1.036E+08 | 1.904E+08 | 4.487E+08 | 3.080E+08 |
| PI(18:0/22:6)+NH4 | PI | (18:0)  | (22:6) | 1.767E+07 | 7.811E+03 | 1.124E+07 | 2.264E+07 | 8.705E+07 | 1.058E+07 | 5.404E+07 | 1.005E+08 | 7.628E+07 |
| PI(18:0e/22:6)-H  | PI | (18:0e) | (22:6) | 3.684E+04 | 0.000E+00 | 3.122E+05 | 1.498E+06 | 9.550E+05 | 0.000E+00 | 4.338E+06 | 1.514E+07 | 6.903E+07 |
| PI(18:0p/22:6)-H  | PI | (18:0p) | (22:6) | 7.521E+06 | 3.356E+06 | 6.573E+06 | 4.075E+06 | 4.191E+07 | 5.991E+06 | 6.223E+07 | 2.965E+07 | 1.262E+08 |
| PI(18:1/22:6)-H   | PI | (18:1)  | (22:6) | 2.201E+08 | 9.397E+07 | 1.764E+08 | 4.647E+05 | 3.259E+05 | 3.940E+07 | 1.501E+08 | 4.557E+05 | 1.100E+08 |
| PI(18:1/22:6)+NH4 | PI | (18:1)  | (22:6) | 6.134E+05 | 1.649E+07 | 4.241E+07 | 1.669E+07 | 4.432E+07 | 5.099E+06 | 2.605E+07 | 8.137E+07 | 8.621E+07 |
| PI(18:1/22:6)-H   | PI | (18:1)  | (22:6) | 2.145E+08 | 9.363E+07 | 1.762E+08 | 1.830E+07 | 3.694E+07 | 3.939E+07 | 1.484E+08 | 1.193E+08 | 1.022E+08 |
| PI(18:1/22:6)-H   | PI | (18:1)  | (22:6) | 1.058E+08 | 4.772E+07 | 7.800E+07 | 3.214E+06 | 4.458E+05 | 1.769E+07 | 6.951E+07 | 1.480E+06 | 3.407E+07 |
| PI(18:1/22:6)+NH4 | PI | (18:1)  | (22:6) | 7.430E+06 | 1.530E+06 | 7.425E+05 | 4.245E+06 | 1.132E    |           |           |           |           |

|                  |    |         |        |           |           |           |           |           |           |           |           |           |
|------------------|----|---------|--------|-----------|-----------|-----------|-----------|-----------|-----------|-----------|-----------|-----------|
| PS(17:0/18:1)-H  | PS | (17:0)  | (18:1) | 2.594E+04 | 6.748E+04 | 1.555E+06 | 3.373E+05 | 2.387E+05 | 0.000E+00 | 4.349E+05 | 4.049E+05 | 2.001E+06 |
| PS(17:0/18:1)-H  | PS | (17:0)  | (18:1) | 5.054E+04 | 4.847E+04 | 7.595E+05 | 1.993E+06 | 4.709E+05 | 1.524E+06 | 4.152E+05 | 2.973E+05 | 2.054E+06 |
| PS(18:0/18:1)+H  | PS | (18:0)  | (18:1) | 0.000E+00 | 0.000E+00 | 4.810E+04 | 6.078E+06 | 4.182E+06 | 9.087E+06 | 2.954E+07 | 1.145E+07 | 2.851E+07 |
| PS(18:0/18:1)-H  | PS | (18:0)  | (18:1) | 2.713E+05 | 1.888E+05 | 2.006E+07 | 3.408E+08 | 5.023E+08 | 6.247E+08 | 4.251E+08 | 5.038E+08 | 1.114E+09 |
| PS(18:0/18:1)+H  | PS | (18:0)  | (18:1) | 2.723E+06 | 9.246E+05 | 1.023E+08 | 5.206E+07 | 1.172E+08 | 2.121E+08 | 1.659E+08 | 8.525E+08 | 1.393E+09 |
| PS(18:0/18:1)+H  | PS | (18:0)  | (18:1) | 2.200E+07 | 7.653E+07 | 7.637E+08 | 9.425E+08 | 1.139E+09 | 2.656E+09 | 9.522E+08 | 2.041E+09 | 2.095E+09 |
| PS(18:0/18:1)-H  | PS | (18:0)  | (18:1) | 6.555E+05 | 4.062E+06 | 4.164E+08 | 1.764E+08 | 6.577E+08 | 2.059E+08 | 5.775E+08 | 3.196E+08 | 5.562E+08 |
| PS(18:0/18:1)-H  | PS | (18:0)  | (18:1) | 1.160E+07 | 3.757E+07 | 4.225E+08 | 1.625E+08 | 6.456E+08 | 2.059E+08 | 5.775E+08 | 2.422E+08 | 5.562E+08 |
| PS(18:0p/18:1)-H | PS | (18:0p) | (18:1) | 0.000E+00 | 0.000E+00 | 0.000E+00 | 4.854E+05 | 6.103E+06 | 1.130E+06 | 1.817E+06 | 0.000E+00 | 1.583E+05 |
| PS(18:0/18:2)+H  | PS | (18:0)  | (18:2) | 0.000E+00 | 0.000E+00 | 6.472E+06 | 4.056E+06 | 1.812E+06 | 5.664E+06 | 8.956E+06 | 1.286E+06 | 4.343E+06 |
| PS(18:1/18:1)+H  | PS | (18:1)  | (18:1) | 0.000E+00 | 0.000E+00 | 5.083E+06 | 1.058E+07 | 3.323E+06 | 8.446E+06 | 2.654E+07 | 4.710E+06 | 8.612E+06 |
| PS(18:0/18:2)+H  | PS | (18:0)  | (18:2) | 4.891E+07 | 4.667E+07 | 2.430E+08 | 1.977E+08 | 3.911E+08 | 1.197E+08 | 1.716E+08 | 2.187E+08 | 7.648E+08 |
| PS(18:0/18:2)+H  | PS | (18:0)  | (18:2) | 9.386E+05 | 6.913E+05 | 3.871E+07 | 2.823E+08 | 1.381E+07 | 2.106E+08 | 9.662E+07 | 2.280E+07 | 7.225E+08 |
| PS(18:0/18:2)+H  | PS | (18:0)  | (18:2) | 6.875E+05 | 0.000E+00 | 5.842E+07 | 1.662E+07 | 6.666E+07 | 2.484E+07 | 3.985E+07 | 1.428E+08 | 7.933E+07 |
| PS(18:0/18:2)-H  | PS | (18:0)  | (18:2) | 2.696E+05 | 0.000E+00 | 1.207E+08 | 1.503E+08 | 5.647E+07 | 1.722E+08 | 1.835E+08 | 1.670E+07 | 7.368E+08 |
| PS(18:0/18:2)+H  | PS | (18:0)  | (18:2) | 6.699E+06 | 8.406E+06 | 5.842E+07 | 2.509E+08 | 1.455E+08 | 9.090E+07 | 1.144E+08 | 1.365E+08 | 1.943E+08 |
| PS(18:0/18:2)-H  | PS | (18:0)  | (18:2) | 0.000E+00 | 9.156E+04 | 4.297E+06 | 9.185E+05 | 3.912E+06 | 8.184E+06 | 2.616E+06 | 2.485E+04 | 8.605E+06 |
| PS(18:1/18:1)-H  | PS | (18:1)  | (18:1) | 0.000E+00 | 1.646E+06 | 2.460E+06 | 4.486E+06 | 2.550E+06 | 4.399E+06 | 8.504E+06 | 8.709E+05 | 3.527E+07 |
| PS(18:0/18:2)-H  | PS | (18:0)  | (18:2) | 0.000E+00 | 1.640E+06 | 1.232E+07 | 5.811E+06 | 4.613E+07 | 3.760E+07 | 1.100E+07 | 9.019E+06 | 1.566E+08 |
| PS(18:0/18:2)-H  | PS | (18:0)  | (18:2) | 3.342E+05 | 8.973E+05 | 3.247E+06 | 4.179E+05 | 9.345E+06 | 2.985E+06 | 3.804E+06 | 2.508E+06 | 9.186E+06 |
| PS(18:0/18:2)+H  | PS | (18:0)  | (18:2) | 1.047E+06 | 2.444E+08 | 3.727E+08 | 2.498E+08 | 6.208E+08 | 8.728E+08 | 2.129E+08 | 4.530E+08 | 9.089E+08 |
| PS(18:0/18:2)-H  | PS | (18:0)  | (18:2) | 7.038E+05 | 1.271E+08 | 2.546E+07 | 6.964E+07 | 6.535E+07 | 1.020E+07 | 1.558E+07 | 2.791E+07 | 4.854E+07 |
| PS(18:1/18:2)-H  | PS | (18:1)  | (18:2) | 1.155E+07 | 7.188E+06 | 1.865E+07 | 1.121E+07 | 2.774E+07 | 2.555E+07 | 7.359E+07 | 6.475E+06 | 9.114E+06 |
| PS(18:1/18:2)+H  | PS | (18:1)  | (18:2) | 3.991E+06 | 5.746E+05 | 1.518E+07 | 1.540E+07 | 3.177E+06 | 1.619E+07 | 7.359E+07 | 7.124E+06 | 0.000E+00 |
| PS(16:0/20:4)-H  | PS | (16:0)  | (20:4) | 0.000E+00 | 0.000E+00 | 1.065E+06 | 5.289E+05 | 1.361E+03 | 2.334E+05 | 6.353E+04 | 0.000E+00 | 4.319E+05 |
| PS(16:0/20:4)-H  | PS | (16:0)  | (20:4) | 0.000E+00 | 0.000E+00 | 6.604E+05 | 2.333E+06 | 0.000E+00 | 6.008E+05 | 0.000E+00 | 0.000E+00 | 0.000E+00 |
| PS(16:0/20:4)-H  | PS | (16:0)  | (20:4) | 1.058E+05 | 0.000E+00 | 6.773E+06 | 1.195E+06 | 1.846E+05 | 1.270E+04 | 7.969E+05 | 0.000E+00 | 5.136E+06 |
| PS(16:0/20:4)+H  | PS | (16:0)  | (20:4) | 0.000E+00 | 6.465E+05 | 1.667E+07 | 2.329E+07 | 5.920E+06 | 4.607E+06 | 1.606E+06 | 7.491E+05 | 2.233E+07 |
| PS(16:0/20:4)-H  | PS | (16:0)  | (20:4) | 0.000E+00 | 7.058E+05 | 3.405E+05 | 2.569E+06 | 6.076E+06 | 5.011E+06 | 0.000E+00 | 4.528E+03 | 1.243E+06 |
| PS(16:0/20:4)-H  | PS | (16:0)  | (20:4) | 7.936E+05 | 2.388E+06 | 2.074E+06 | 2.928E+05 | 7.139E+05 | 2.606E+05 | 2.223E+04 | 0.000E+00 | 8.717E+05 |
| PS(16:0/20:4)-H  | PS | (16:0)  | (20:4) | 0.000E+00 | 3.172E+06 | 6.727E+06 | 4.149E+06 | 1.308E+07 | 1.367E+06 | 1.388E+05 | 5.386E+06 | 1.615E+06 |
| PS(16:0/20:4)+H  | PS | (16:0)  | (20:4) | 0.000E+00 | 9.017E+07 | 2.150E+07 | 3.584E+07 | 7.157E+06 | 2.789E+06 | 1.046E+06 | 3.208E+07 | 8.751E+06 |
| PS(16:0p/20:4)-H | PS | (16:0p) | (20:4) | 1.429E+06 | 1.354E+06 | 3.894E+06 | 5.748E+05 | 5.281E+05 | 1.599E+05 | 2.441E+06 | 2.805E+06 | 6.999E+06 |
| PS(18:1/19:0)-H  | PS | (18:1)  | (19:0) | 1.532E+05 | 7.750E+05 | 6.654E+04 | 7.191E+05 | 1.054E+06 | 6.941E+05 | 9.769E+05 | 2.269E+06 | 4.690E+05 |
| PS(18:1/19:0)-H  | PS | (18:1)  | (19:0) | 1.802E+05 | 2.759E+06 | 7.909E+05 | 2.352E+06 | 1.292E+06 | 1.252E+06 | 1.370E+06 | 6.012E+05 | 1.562E+06 |
| PS(20:0/18:1)-H  | PS | (20:0)  | (18:1) | 0.000E+00 | 0.000E+00 | 0.000E+00 | 0.000E+00 | 3.141E+05 | 4.788E+05 | 1.211E+06 | 6.643E+06 | 4.215E+06 |
| PS(20:0/18:1)+H  | PS | (20:0)  | (18:1) | 0.000E+00 | 0.000E+00 | 3.003E+06 | 4.579E+06 | 5.130E+06 | 1.605E+07 | 2.428E+07 | 3.046E+07 | 4.832E+07 |
| PS(20:0/18:1)-H  | PS | (20:0)  | (18:1) | 0.000E+00 | 0.000E+00 | 0.000E+00 | 2.427E+05 | 5.100E+03 | 6.527E+05 | 5.566E+06 | 1.283E+06 | 2.779E+06 |
| PS(20:0/18:1)+H  | PS | (20:0)  | (18:1) | 4.783E+04 | 0.000E+00 | 3.186E+05 | 3.428E+06 | 6.859E+06 | 6.713E+06 | 6.673E+07 | 1.013E+08 | 2.126E+07 |
| PS(20:0/18:2)+H  | PS | (20:0)  | (18:2) | 5.475E+05 | 0.000E+00 | 4.085E+05 | 6.242E+06 | 1.369E+07 | 4.517E+06 | 7.685E+06 | 2.061E+07 | 2.445E+07 |
| PS(20:0/18:2)-H  | PS | (20:0)  | (18:2) | 0.000E+00 | 0.000E+00 | 2.489E+05 | 5.984E+05 | 3.729E+05 | 1.418E+06 | 8.233E+05 | 1.410E+06 | 5.509E+06 |
| PS(18:0/20:3)-H  | PS | (18:0)  | (20:3) | 0.000E+00 | 0.000E+00 | 3.297E+07 | 7.313E+06 | 7.296E+06 | 5.192E+07 | 7.095E+06 | 6.936E+06 | 5.883E+06 |
| PS(18:0/20:3)-H  | PS | (18:0)  | (20:3) | 0.000E+00 | 0.000E+00 | 2.013E+06 | 1.558E+06 | 5.098E+06 | 3.822E+06 | 1.076E+07 | 3.313E+06 | 2.392E+06 |
| PS(18:0/20:3)+H  | PS | (18:0)  | (20:3) | 2.025E+07 | 7.844E+05 | 2.011E+07 | 1.338E+08 | 1.781E+08 | 5.202E+07 | 1.335E+08 | 2.386E+08 | 4.727E+08 |
| PS(18:0/20:3)-H  | PS | (18:0)  | (20:3) | 3.710E+06 | 6.415E+06 | 4.996E+06 | 2.476E+06 | 1.427E+06 | 9.577E+06 | 1.215E+07 | 3.235E+06 | 1.018E+08 |
| PS(18:0/20:3)+H  | PS | (18:0)  | (20:3) | 1.660E+06 | 3.970E+06 | 5.673E+08 | 1.348E+08 | 2.538E+06 | 1.033E+07 | 4.725E+06 | 2.743E+06 | 3.238E+08 |
| PS(20:1/18:2)-H  | PS | (20:1)  | (18:2) | 5.539E+08 | 2.800E+08 | 5.673E+08 | 1.348E+08 | 1.100E+08 | 3.701E+07 | 1.120E+07 | 1.188E+07 | 3.238E+08 |
| PS(18:1/20:2)-H  | PS | (18:1)  | (20:2) | 7.369E+05 | 3.801E+06 | 2.004E+07 | 1.705E+06 | 3.910E+07 | 1.326E+07 | 5.275E+06 | 4.336E+04 | 1.436E+07 |
| PS(18:0/20:3)-H  | PS | (18:0)  | (20:3) | 4.874E+06 | 3.148E+07 | 3.543E+07 | 3.494E+07 | 9.311E+07 | 1.179E+08 | 2.511E+07 | 4.708E+07 | 7.016E+07 |
| PS(18:0/20:3)-H  | PS | (18:0)  | (20:3) | 1.802E+07 | 5.823E+06 | 4.741E+07 | 6.881E+05 | 6.391E+07 | 7.387E+07 | 2.511E+07 | 2.491E+07 | 2.347E+07 |
| PS(18:0/20:3)-H  | PS | (18:0)  | (20:3) | 1.013E+05 | 6.072E+05 | 1.056E+06 | 3.349E+06 | 3.259E+06 | 1.555E+06 | 3.212E+05 | 1.065E+06 | 7.958E+06 |
| PS(20:1/18:2)-H  | PS | (20:1)  | (18:2) | 9.635E+04 | 5.779E+07 | 1.534E+08 | 4.988E+07 | 1.681E+08 | 6.477E+07 | 8.889E+07 | 3.819E+07 | 7.819E+07 |
| PS(18:0/20:4)+H  | PS | (18:0)  | (20:4) | 2.868E+07 | 2.444E+07 | 6.443E+07 | 1.082E+08 | 6.646E+07 | 2.018E+08 | 3.203E+08 | 1.707E+08 | 2.375E+08 |
| PS(18:0/20:4)-H  | PS | (18:0)  | (20:4) | 0.000E+00 | 0.000E+00 | 2.439E+07 | 8.976E+07 | 2.745E+07 | 8.669E+07 | 5.893E+07 | 2.538E+07 | 1.501E+08 |
| PS(18:0/20:4)+H  | PS | (18:0)  | (20:4) | 2.758E+06 | 7.703E+05 | 9.588E+07 | 2.240E+08 | 7.686E+07 | 9.269E+07 | 3.691E+08 | 3.226E+07 | 1.177E+08 |
| PS(18:0/20:4)+H  | PS | (18:0)  | (20:4) | 3.087E+06 | 2.170E+06 | 2.654E+07 | 8.485E+07 | 7.479E+06 | 7.892E+07 | 5.364E+07 | 1.828E+08 | 2.140E+07 |
| PS(18:0/20:4)-H  | PS | (18:0)  | (20:4) | 0.000E+00 | 0.000E+00 | 1.780E+08 | 1.908E+08 | 2.195E+08 | 4.249E+08 | 2.052E+08 | 1.766E+07 | 8.947E+08 |
| PS(18:0/20:4)+H  | PS | (18:0)  | (20:4) | 1.643E+07 | 7.890E+06 | 2.298E+08 | 2.532E+08 | 3.193E+08 | 4.362E+08 | 2.174E+08 | 2.526E+08 | 1.674E+09 |
| PS(18:1/20:3)-H  | PS | (18:1)  | (20:3) | 3.966E+07 | 3.840E+07 | 1.233E+08 | 7.802E+07 | 1.255E+08 | 5.255E+06 | 7.783E+07 | 3.568E+07 | 3.360E+08 |
| PS(20:2/18:2)-H  | PS | (20:2)  | (18:2) | 9.376E+07 | 5.103E+07 | 7.883E+07 | 1.035E+08 | 5.628E+07 | 5.936E+07 | 4.539E+07 | 3.508E+07 | 2.561E+07 |
| PS(18:0/20:4)+H  | PS | (18:0)  | (20:4) | 5.550E+06 | 4.510E+08 | 3.934E+08 | 3.754E+08 | 8.989E+08 | 9.314E+08 | 2.874E+08 | 5.796E+08 | 1.118E+09 |
| PS(18:0/20:4)-H  | PS | (18:0)  | (20:4) | 8.978E+05 | 1.890E+08 | 1.742E+08 | 3.438E+07 | 4.736E+08 | 4.872E+08 | 2.104E+08 | 1.481E+08 | 3.201E+08 |
| PS(18:0p/20:4)-H | PS | (18:0p) | (20:4) | 2.308E+04 | 3.308E+06 | 1.192E+07 | 8.068E+06 | 7.254E+06 | 4.154E+06 | 4.181E+06 | 2.268E+07 | 2.604E+07 |
| PS(18:0/20:5)-H  | PS | (18:0)  | (20:5) | 0.000E+00 | 0.000E+00 | 5.661E+05 | 1.275E+06 | 7.697E+05 | 4.773E+06 | 6.320E+05 | 1.074E+06 | 2.195E+07 |
| PS(18:0/20:5)-H  | PS | (18:0)  | (20:5) | 6.766E+07 | 3.880E+07 | 1.611E+07 | 2.837E+08 | 3.086E+08 | 1.133E+08 | 3.289E+08 | 3.577E+08 | 3.567E+08 |
| PS(18:1/20:4)-H  | PS | (18:1)  | (20:4) | 1.748E+07 | 3.113E+06 | 2.087E+06 | 9.542E+06 | 2.333E+07 | 4.370E+06 | 4.473E+07 | 2.857E+07 | 2.881E+06 |
| PS(18:1p/20:4)-H | PS | (18:1p) | (20:4) | 2.364E+06 | 8.710E+06 | 7.106E+06 | 1.698E+06 | 3.218E+06 | 1.230E+06 | 2.574E+06 | 2.256E+06 | 9.540E+06 |
| PS(16:0/22:6)+H  | PS | (16:0)  | (22:6) | 0.000E+00 | 0.000E+00 | 2.927E+06 | 6.727E+06 | 0.000E+00 | 9.643E+06 | 0.000E+00 | 0.000E+00 | 1.405E+07 |
| PS(16:0/22:6)-H  | PS | (16:0)  | (22:6) | 0.000E+00 | 0.000E+00 | 3.581E+06 | 1.733E+06 | 4.678E+03 | 6.061E+06 | 0.000E+00 | 0.000E+00 | 8.375E+07 |
| PS(16:0/22:6)+H  | PS | (16:0)  | (22:6) | 0.000E+00 | 0.000E+00 | 1.741E+06 | 3.909E+06 | 7.043E+06 | 5.428E+06 | 1.531E+04 | 6.021E+06 | 7.116E+06 |
| PS(16:0/22:6)-H  | PS | (16:0)  | (22:6) | 0.000E+00 | 1.777E+06 | 1.111E+07 | 5.929E+06 | 2.450E+07 | 7.654E+07 | 1.111E+07 | 1.634E+08 | 1.714E+08 |
| PS(16:0/22:6)+H  | PS | (16:0)  | (22:6) | 1.982E+06 | 1.178E+07 | 7.155E+06 | 1.966E+06 | 1.084E+06 | 9.626E+05 | 4.084E+0  |           |           |

|                       |    |         |        |           |           |           |           |           |           |           |           |           |
|-----------------------|----|---------|--------|-----------|-----------|-----------|-----------|-----------|-----------|-----------|-----------|-----------|
| PS(18:0/22:6)-H       | PS | (18:0)  | (22:6) | 0.000E+00 | 3.669E+03 | 4.007E+07 | 4.822E+07 | 2.226E+07 | 7.377E+07 | 6.594E+07 | 1.377E+07 | 4.698E+08 |
| PS(18:0/22:6)+H       | PS | (18:0)  | (22:6) | 1.623E+04 | 0.000E+00 | 6.082E+07 | 4.286E+07 | 7.587E+07 | 2.376E+08 | 3.080E+08 | 1.613E+07 | 1.830E+08 |
| PS(18:0/22:6)-H       | PS | (18:0)  | (22:6) | 0.000E+00 | 0.000E+00 | 1.775E+08 | 1.471E+08 | 4.099E+08 | 6.499E+08 | 4.381E+07 | 2.310E+07 | 1.115E+09 |
| PS(18:0/22:6)+H       | PS | (18:0)  | (22:6) | 4.520E+04 | 4.000E+07 | 1.630E+07 | 9.382E+07 | 5.146E+08 | 6.929E+08 | 7.827E+07 | 4.440E+08 | 1.084E+09 |
| PS(18:0/22:6)-H       | PS | (18:0)  | (22:6) | 4.501E+08 | 3.430E+08 | 4.216E+08 | 5.494E+08 | 7.344E+08 | 4.781E+08 | 5.719E+08 | 6.506E+08 | 1.103E+09 |
| PS(18:0/22:6)+H       | PS | (18:0)  | (22:6) | 0.000E+00 | 7.074E+08 | 6.163E+08 | 3.820E+08 | 1.238E+09 | 1.746E+09 | 2.267E+08 | 9.547E+08 | 1.686E+09 |
| PS(18:0/22:6)-H       | PS | (18:0)  | (22:6) | 2.653E+05 | 3.499E+08 | 3.711E+07 | 2.001E+07 | 1.684E+08 | 4.500E+08 | 1.128E+08 | 2.031E+08 | 7.597E+07 |
| PS(18:0p/22:6)-H      | PS | (18:0p) | (22:6) | 1.345E+06 | 5.009E+05 | 1.317E+06 | 1.363E+07 | 1.188E+07 | 2.004E+06 | 2.851E+06 | 1.357E+07 | 9.759E+06 |
| PS(18:1/23:0)+H       | PS | (18:1)  | (23:0) | 0.000E+00 | 0.000E+00 | 0.000E+00 | 0.000E+00 | 0.000E+00 | 1.605E+05 | 7.793E+04 | 7.436E+06 | 2.761E+07 |
| PS(18:1/24:0)+H       | PS | (18:1)  | (24:0) | 0.000E+00 | 0.000E+00 | 0.000E+00 | 0.000E+00 | 0.000E+00 | 2.209E+06 | 6.155E+06 | 4.354E+07 | 5.140E+07 |
| PS(18:1/24:0)-H       | PS | (18:1)  | (24:0) | 0.000E+00 | 0.000E+00 | 3.967E+04 | 0.000E+00 | 0.000E+00 | 1.477E+05 | 9.274E+06 | 9.707E+06 | 5.090E+06 |
| PS(20:4/22:6)-H       | PS | (20:4)  | (22:6) | 0.000E+00 | 8.250E+04 | 5.659E+05 | 0.000E+00 | 0.000E+00 | 0.000E+00 | 3.066E+04 | 1.219E+06 | 9.106E+06 |
| PS(18:1/24:1)+H       | PS | (18:1)  | (24:1) | 0.000E+00 | 0.000E+00 | 0.000E+00 | 5.505E+05 | 5.753E+05 | 3.344E+06 | 2.577E+07 | 6.186E+07 | 8.551E+07 |
| PS(18:1/24:1)-H       | PS | (18:1)  | (24:1) | 0.000E+00 | 0.000E+00 | 0.000E+00 | 0.000E+00 | 0.000E+00 | 1.869E+05 | 4.636E+06 | 3.457E+06 | 5.559E+06 |
| PS(18:1/24:1)+H       | PS | (18:1)  | (24:1) | 0.000E+00 | 0.000E+00 | 0.000E+00 | 0.000E+00 | 5.603E+05 | 2.500E+06 | 6.415E+06 | 2.487E+07 | 1.833E+07 |
| PS(18:1/24:1)-H       | PS | (18:1)  | (24:1) | 0.000E+00 | 0.000E+00 | 0.000E+00 | 0.000E+00 | 7.307E+04 | 1.491E+05 | 1.007E+06 | 6.742E+05 | 2.294E+06 |
| PS(20:1/22:4)+H       | PS | (20:1)  | (22:4) | 9.573E+07 | 1.177E+07 | 3.174E+07 | 5.769E+08 | 4.729E+08 | 3.179E+08 | 8.096E+07 | 8.396E+08 | 6.250E+08 |
| PS(24:5/18:0)-H       | PS | (24:5)  | (18:0) | 6.544E+06 | 1.918E+06 | 5.121E+06 | 1.372E+07 | 5.387E+07 | 1.393E+07 | 7.743E+07 | 1.386E+07 | 7.575E+07 |
| PS(24:5/18:0)+H       | PS | (24:5)  | (18:0) | 0.000E+00 | 1.129E+05 | 4.031E+06 | 9.750E+05 | 6.092E+06 | 2.285E+07 | 2.081E+06 | 6.828E+06 | 9.494E+06 |
| PS(20:2/22:4)+H       | PS | (20:2)  | (22:4) | 9.023E+06 | 6.634E+06 | 8.941E+06 | 2.107E+07 | 1.758E+07 | 2.503E+07 | 4.569E+07 | 3.635E+07 | 3.454E+06 |
| PS(20:1/22:5)-H       | PS | (20:1)  | (22:5) | 1.716E+08 | 7.156E+07 | 9.079E+07 | 1.999E+08 | 1.515E+08 | 1.038E+08 | 1.956E+08 | 1.837E+08 | 1.521E+08 |
| PS(18:0/24:6)+H       | PS | (18:0)  | (24:6) | 0.000E+00 | 1.379E+06 | 5.447E+06 | 2.673E+06 | 4.947E+06 | 1.015E+07 | 1.642E+06 | 4.444E+06 | 6.487E+06 |
| PS(20:1/22:6)-H       | PS | (20:1)  | (22:6) | 3.021E+03 | 0.000E+00 | 5.242E+04 | 0.000E+00 | 0.000E+00 | 3.495E+05 | 0.000E+00 | 0.000E+00 | 9.448E+05 |
| PS(20:1/22:6)+H       | PS | (20:1)  | (22:6) | 3.853E+07 | 6.678E+07 | 2.874E+07 | 4.812E+07 | 7.581E+07 | 4.581E+07 | 6.456E+07 | 1.200E+08 | 7.866E+07 |
| PS(18:0/24:7)+H       | PS | (18:0)  | (24:7) | 7.517E+04 | 3.247E+06 | 1.689E+07 | 1.666E+06 | 5.436E+06 | 2.421E+07 | 2.660E+06 | 6.539E+06 | 1.298E+07 |
| PS(18:0/24:7)-H       | PS | (18:0)  | (24:7) | 1.046E+05 | 3.950E+05 | 6.065E+05 | 7.110E+05 | 1.223E+06 | 7.204E+06 | 5.426E+05 | 5.041E+06 | 1.872E+06 |
| PS(20:3/22:6)-H       | PS | (20:3)  | (22:6) | 0.000E+00 | 0.000E+00 | 1.332E+05 | 0.000E+00 | 0.000E+00 | 1.449E+05 | 3.155E+05 | 4.039E+04 | 4.846E+05 |
| PS(20:3/22:6)+H       | PS | (20:3)  | (22:6) | 3.263E+06 | 2.283E+06 | 8.319E+05 | 9.222E+05 | 2.999E+05 | 3.853E+06 | 0.000E+00 | 0.000E+00 | 2.330E+07 |
| PS(20:3/22:6)-H       | PS | (20:3)  | (22:6) | 0.000E+00 | 1.379E+07 | 2.950E+06 | 5.366E+05 | 1.266E+07 | 8.830E+06 | 3.102E+05 | 2.995E+06 | 8.532E+06 |
| SM(d18:1/13:0)+H      | SM | (d18:1) | (13:0) | 5.009E+06 | 2.578E+07 | 1.899E+07 | 7.870E+06 | 1.315E+07 | 1.128E+06 | 2.864E+07 | 1.149E+07 | 6.834E+07 |
| SM(d17:1/14:0)+CH3COO | SM | (d17:1) | (14:0) | 2.710E+07 | 5.618E+07 | 5.440E+07 | 7.546E+07 | 9.567E+07 | 2.264E+07 | 6.046E+07 | 9.169E+07 | 1.044E+08 |
| SM(d16:0/16:0)+H      | SM | (d16:0) | (16:0) | 1.703E+06 | 1.529E+06 | 0.000E+00 | 3.114E+06 | 3.544E+06 | 1.186E+06 | 7.137E+06 | 4.239E+07 | 1.401E+07 |
| SM(d16:0/16:1)+HCOO   | SM | (d16:0) | (16:1) | 5.769E+07 | 5.689E+07 | 5.440E+07 | 7.546E+07 | 9.567E+07 | 1.746E+07 | 6.434E+07 | 9.169E+07 | 1.076E+08 |
| SM(d16:0/16:1)+H      | SM | (d16:0) | (16:1) | 4.723E+08 | 3.711E+08 | 5.365E+08 | 6.197E+08 | 6.005E+08 | 2.692E+08 | 7.269E+08 | 1.133E+09 | 1.419E+09 |
| SM(d16:1/16:0)+H      | SM | (d16:1) | (16:0) | 5.393E+06 | 6.883E+07 | 8.298E+07 | 3.136E+07 | 6.129E+08 | 2.692E+08 | 7.061E+08 | 1.209E+09 | 8.490E+08 |
| SM(d14:1/18:1)+H      | SM | (d14:1) | (18:1) | 4.158E+07 | 4.835E+07 | 2.222E+06 | 5.594E+07 | 7.382E+07 | 2.089E+07 | 4.786E+07 | 4.147E+07 | 3.295E+06 |
| SM(d17:1/16:0)+HCOO   | SM | (d17:1) | (16:0) | 2.702E+08 | 3.100E+08 | 2.869E+08 | 2.665E+08 | 2.382E+08 | 1.269E+08 | 2.758E+08 | 3.397E+08 | 4.024E+08 |
| SM(d17:1/16:0)+H      | SM | (d17:1) | (16:0) | 2.438E+09 | 2.942E+09 | 2.561E+09 | 3.509E+09 | 2.813E+09 | 1.493E+09 | 3.625E+09 | 4.697E+09 | 5.614E+09 |
| SM(d17:1/16:0)+CH3COO | SM | (d17:1) | (16:0) | 4.118E+09 | 3.628E+09 | 3.900E+09 | 6.143E+09 | 5.434E+09 | 4.220E+09 | 4.757E+09 | 8.108E+09 | 7.260E+09 |
| SM(d16:0/18:0)+H      | SM | (d16:0) | (18:0) | 1.938E+09 | 1.520E+09 | 1.245E+09 | 4.508E+09 | 3.595E+09 | 3.364E+09 | 3.895E+09 | 5.304E+09 | 4.403E+09 |
| SM(d18:1/16:0)+HCOO   | SM | (d18:1) | (16:0) | 4.081E+09 | 3.574E+09 | 3.911E+09 | 6.646E+09 | 5.434E+09 | 4.220E+09 | 4.877E+09 | 8.168E+09 | 7.311E+09 |
| SM(d18:1/16:0)+H      | SM | (d18:1) | (16:0) | 2.010E+10 | 1.692E+10 | 1.870E+10 | 3.257E+10 | 2.748E+10 | 2.611E+10 | 2.912E+10 | 4.295E+10 | 3.867E+10 |
| SM(d18:0/16:1)+H      | SM | (d18:0) | (16:1) | 6.018E+07 | 3.420E+07 | 1.932E+07 | 2.026E+07 | 1.064E+07 | 1.433E+07 | 3.038E+07 | 2.023E+07 | 2.144E+07 |
| SM(d18:1/16:0)+CH3COO | SM | (d18:1) | (16:0) | 3.312E+07 | 2.947E+07 | 3.530E+05 | 1.434E+06 | 2.321E+07 | 2.958E+06 | 5.572E+05 | 9.330E+05 | 0.000E+00 |
| SM(d18:0/16:1)+H      | SM | (d18:0) | (16:1) | 2.036E+06 | 5.582E+06 | 1.399E+06 | 1.530E+06 | 2.196E+06 | 4.077E+06 | 1.272E+06 | 3.609E+06 | 3.575E+06 |
| SM(d16:1/18:0)+HCOO   | SM | (d16:1) | (18:0) | 2.444E+05 | 5.600E+04 | 2.557E+05 | 3.706E+05 | 3.991E+05 | 3.297E+05 | 1.516E+05 | 5.148E+05 | 5.658E+05 |
| SM(d17:1/17:1)+H      | SM | (d17:1) | (17:1) | 1.313E+09 | 7.662E+08 | 1.269E+09 | 1.948E+09 | 1.521E+09 | 1.226E+09 | 1.145E+09 | 2.172E+09 | 1.785E+09 |
| SM(d17:1/17:1)+HCOO   | SM | (d17:1) | (17:1) | 9.782E+07 | 8.631E+07 | 7.052E+07 | 1.839E+08 | 8.783E+07 | 1.152E+08 | 8.973E+07 | 1.682E+08 | 1.155E+08 |
| SM(d16:0/18:4)+H      | SM | (d16:0) | (18:4) | 2.530E+06 | 1.086E+07 | 1.185E+06 | 1.856E+07 | 1.314E+07 | 1.794E+06 | 1.033E+07 | 1.178E+07 | 9.107E+06 |
| SM(d16:0/19:1)+HCOO   | SM | (d16:0) | (19:1) | 5.375E+05 | 5.271E+07 | 5.456E+07 | 4.833E+07 | 3.015E+05 | 4.498E+07 | 1.097E+06 | 1.833E+07 | 2.961E+07 |
| SM(d16:0/19:1)+H      | SM | (d16:0) | (19:1) | 1.318E+08 | 3.473E+08 | 7.191E+08 | 7.292E+08 | 6.621E+08 | 5.973E+08 | 6.264E+08 | 8.861E+08 | 7.434E+08 |
| SM(d17:1/18:3)+H      | SM | (d17:1) | (18:3) | 6.127E+07 | 7.668E+07 | 2.366E+07 | 2.360E+07 | 3.883E+07 | 2.392E+07 | 2.282E+07 | 1.310E+07 | 2.866E+07 |
| SM(d18:0/18:0)+H      | SM | (d18:0) | (18:0) | 5.972E+08 | 5.052E+08 | 4.393E+08 | 3.748E+08 | 6.010E+08 | 1.492E+08 | 3.258E+08 | 4.449E+08 | 2.843E+08 |
| SM(d18:1/18:0)+HCOO   | SM | (d18:1) | (18:0) | 1.214E+09 | 8.344E+08 | 1.038E+09 | 7.396E+08 | 7.698E+08 | 4.399E+08 | 4.545E+08 | 8.956E+08 | 7.007E+08 |
| SM(d18:1/18:0)+H      | SM | (d18:1) | (18:0) | 7.905E+09 | 5.216E+09 | 6.888E+09 | 3.774E+09 | 4.555E+09 | 3.373E+09 | 3.460E+09 | 5.251E+09 | 4.420E+09 |
| SM(d18:0/18:2)+H      | SM | (d18:0) | (18:2) | 1.090E+08 | 1.070E+08 | 1.917E+07 | 1.262E+08 | 4.506E+07 | 7.828E+07 | 6.078E+07 | 1.099E+08 | 7.921E+07 |
| SM(d18:0/18:2)+HCOO   | SM | (d18:0) | (18:2) | 3.501E+07 | 7.946E+06 | 2.503E+07 | 2.385E+07 | 5.647E+06 | 4.767E+05 | 9.560E+06 | 2.337E+07 | 6.067E+06 |
| SM(d18:1/18:1)+H      | SM | (d18:1) | (18:1) | 2.411E+08 | 6.127E+07 | 3.432E+07 | 5.338E+07 | 8.231E+07 | 7.728E+07 | 9.930E+07 | 1.311E+08 | 3.823E+07 |
| SM(d18:1/18:3)+H      | SM | (d18:1) | (18:3) | 3.674E+06 | 1.340E+07 | 2.035E+06 | 2.259E+07 | 1.073E+07 | 2.747E+07 | 5.990E+07 | 4.965E+07 | 1.918E+07 |
| SM(d18:2/18:2)+HCOO   | SM | (d18:2) | (18:2) | 2.780E+06 | 8.198E+05 | 2.687E+06 | 7.858E+03 | 2.370E+05 | 7.496E+05 | 1.816E+06 | 1.293E+06 | 9.652E+05 |
| SM(d16:0/20:5)+H      | SM | (d16:0) | (20:5) | 1.129E+07 | 2.249E+07 | 1.369E+07 | 1.293E+07 | 2.001E+07 | 2.755E+07 | 5.292E+06 | 1.306E+07 | 6.018E+05 |
| SM(d18:1/20:0)+HCOO   | SM | (d18:1) | (20:0) | 1.339E+09 | 1.085E+09 | 1.195E+09 | 7.251E+08 | 8.228E+08 | 4.702E+08 | 4.785E+08 | 1.083E+09 | 1.393E+09 |
| SM(d18:1/20:0)+H      | SM | (d18:1) | (20:0) | 9.464E+09 | 7.922E+09 | 8.446E+09 | 5.041E+09 | 6.016E+09 | 3.957E+09 | 4.111E+09 | 9.005E+09 | 1.241E+10 |
| SM(d18:0/20:2)+HCOO   | SM | (d18:0) | (20:2) | 5.191E+05 | 2.739E+07 | 2.465E+07 | 1.790E+07 | 1.233E+07 | 2.000E+06 | 8.395E+06 | 1.868E+07 | 8.623E+05 |
| SM(d18:0/20:2)+H      | SM | (d18:0) | (20:2) | 1.519E+08 | 1.590E+08 | 2.704E+08 | 1.051E+08 | 9.751E+07 | 7.728E+07 | 5.708E+07 | 7.867E+07 | 1.104E+08 |
| SM(d20:0/18:2)+HCOO   | SM | (d20:0) | (18:2) | 3.952E+07 | 4.677E+07 | 3.859E+06 | 1.250E+07 | 1.377E+07 | 3.756E+07 | 5.486E+06 | 8.619E+06 | 3.865E+07 |
| SM(d20:0/18:2)+H      | SM | (d20:0) | (18:2) | 3.317E+08 | 1.348E+09 | 1.653E+08 | 1.140E+08 | 8.776E+07 | 5.854E+07 | 8.522E+07 | 1.082E+08 | 1.156E+08 |
| SM(d16:0/23:1)+H      | SM | (d16:0) | (23:1) | 6.792E+08 | 7.996E+08 | 7.524E+08 | 6.807E+08 | 8.761E+08 | 5.214E+08 | 8.362E+08 | 1.352E+09 | 2.280E+09 |
| SM(d16:0/23:1)+HCOO   | SM | (d16:0) | (23:1) | 1.307E+08 | 1.517E+08 | 9.677E+07 | 1.041E+08 | 9.394E+07 | 5.316E+07 | 1.315E+08 | 2.163E+08 | 3.659E+08 |
| SM(d16:0/23:1)+HCOO   | SM | (d16:0) | (23:1) | 6.054E+07 | 2.735E+07 | 2.256E+07 | 0.000E+00 | 2.891E+07 | 8.571E+05 | 8.430E+06 | 6.895E+06 | 4.568E+07 |
| SM(d18:1/21:0)+H      | SM | (d18:1) | (21:0) | 1.919E+06 | 8.016E+05 | 6.320E+06 | 7.606E+06 | 2.784E+06 | 3.752E+06 | 2.282E+07 | 1.989E+07 | 1.155E+08 |
| SM(d18:1/21:1)+H      | SM | (d18:1) | (21:1) | 2.616E+06 | 2.39      |           |           |           |           |           |           |           |

|                        |       |         |               |           |           |           |           |           |           |           |           |           |
|------------------------|-------|---------|---------------|-----------|-----------|-----------|-----------|-----------|-----------|-----------|-----------|-----------|
| SM(d18:1/24:3)+H       | SM    | (d18:1) | (24:3)        | 3.503E+05 | 2.041E+03 | 8.708E+05 | 9.804E+06 | 6.762E+06 | 2.418E+06 | 2.236E+06 | 1.020E+06 | 4.321E+07 |
| SM(d18:1/25:0)+H       | SM    | (d18:1) | (25:0)        | 2.338E+08 | 2.319E+08 | 3.820E+08 | 6.496E+09 | 2.857E+09 | 2.714E+09 | 1.339E+09 | 7.474E+09 | 8.676E+09 |
| SM(d18:1/25:0)+HCOO    | SM    | (d18:1) | (25:0)        | 2.270E+08 | 2.683E+08 | 7.997E+07 | 1.764E+09 | 1.175E+09 | 8.059E+08 | 6.924E+08 | 1.665E+09 | 2.348E+09 |
| SM(d25:0/18:1)+HCOO    | SM    | (d25:0) | (18:1)        | 8.565E+07 | 1.050E+08 | 2.068E+08 | 4.554E+08 | 1.061E+07 | 3.421E+08 | 2.175E+08 | 2.566E+08 | 5.241E+08 |
| SM(d18:1/25:0)+H       | SM    | (d18:1) | (25:0)        | 1.921E+08 | 1.578E+08 | 3.018E+08 | 9.493E+08 | 4.746E+08 | 6.461E+08 | 6.168E+08 | 1.134E+09 | 4.841E+08 |
| SM(d18:1/25:1)+H       | SM    | (d18:1) | (25:1)        | 7.622E+08 | 1.723E+08 | 7.842E+08 | 2.182E+09 | 2.155E+09 | 1.616E+09 | 1.898E+09 | 3.816E+09 | 3.783E+09 |
| SM(d18:1/25:1)+HCOO    | SM    | (d18:1) | (25:1)        | 1.079E+08 | 1.282E+08 | 1.660E+08 | 2.446E+08 | 3.770E+08 | 3.196E+08 | 2.663E+08 | 5.226E+08 | 5.173E+08 |
| SM(d18:1/25:3)+H       | SM    | (d18:1) | (25:3)        | 2.126E+07 | 1.194E+08 | 3.592E+07 | 3.334E+07 | 1.021E+08 | 7.296E+07 | 1.339E+08 | 1.263E+08 | 7.871E+07 |
| SM(d18:1/25:3)+H       | SM    | (d18:1) | (25:3)        | 2.623E+05 | 0.000E+00 | 6.701E+05 | 8.393E+06 | 3.793E+06 | 8.392E+05 | 2.356E+06 | 8.652E+06 | 4.541E+07 |
| SM(d22:1/22:0)+HCOO    | SM    | (d22:1) | (22:0)        | 6.856E+05 | 1.386E+06 | 2.344E+06 | 3.378E+07 | 2.345E+07 | 1.248E+05 | 2.605E+06 | 1.026E+06 | 1.974E+08 |
| SM(d22:1/22:0)+HCOO    | SM    | (d22:1) | (22:0)        | 1.312E+08 | 1.682E+08 | 3.222E+08 | 2.172E+09 | 8.552E+08 | 2.175E+08 | 6.788E+08 | 2.584E+09 | 2.034E+09 |
| SM(d22:1/22:0)+H       | SM    | (d22:1) | (22:0)        | 1.017E+08 | 5.476E+08 | 8.681E+08 | 5.488E+09 | 1.623E+09 | 9.065E+08 | 3.204E+08 | 2.062E+09 | 9.486E+08 |
| SM(d16:0/28:1)+H       | SM    | (d16:0) | (28:1)        | 6.275E+08 | 6.280E+08 | 1.239E+09 | 5.527E+09 | 4.023E+09 | 7.903E+08 | 3.204E+08 | 5.774E+09 | 3.738E+09 |
| SM(d16:0/28:1)+HCOO    | SM    | (d16:0) | (28:1)        | 4.287E+07 | 1.032E+08 | 5.424E+08 | 7.238E+09 | 1.753E+09 | 4.938E+08 | 6.599E+08 | 2.970E+09 | 1.415E+09 |
| SM(d16:0/28:1)+H       | SM    | (d16:0) | (28:1)        | 1.371E+09 | 1.168E+09 | 1.010E+09 | 3.238E+09 | 1.971E+09 | 2.233E+09 | 1.788E+09 | 3.488E+09 | 3.738E+09 |
| SM(d16:0/28:1)+HCOO    | SM    | (d16:0) | (28:1)        | 1.681E+08 | 8.684E+07 | 5.424E+08 | 1.210E+09 | 6.475E+08 | 4.911E+08 | 2.682E+08 | 2.970E+09 | 7.263E+08 |
| SM(d18:1/26:1)+H       | SM    | (d18:1) | (26:1)        | 5.050E+08 | 3.843E+08 | 4.890E+08 | 1.722E+09 | 1.386E+09 | 1.090E+09 | 1.580E+09 | 2.464E+09 | 2.240E+09 |
| SM(d18:1/26:1)+HCOO    | SM    | (d18:1) | (26:1)        | 1.036E+08 | 1.722E+08 | 1.478E+08 | 3.500E+08 | 3.133E+08 | 2.520E+08 | 2.757E+08 | 3.563E+08 | 3.359E+08 |
| SM(d16:0/28:2)+HCOO    | SM    | (d16:0) | (28:2)        | 5.144E+06 | 4.257E+06 | 6.493E+06 | 3.303E+07 | 2.191E+07 | 2.888E+06 | 2.682E+07 | 6.341E+06 | 2.398E+07 |
| SM(d18:1/26:2)+H       | SM    | (d18:1) | (26:2)        | 2.013E+08 | 1.640E+08 | 1.418E+08 | 1.447E+07 | 3.541E+07 | 4.900E+07 | 1.022E+07 | 2.935E+07 | 3.763E+07 |
| SM(d18:1/26:2)+HCOO    | SM    | (d18:1) | (26:2)        | 6.931E+06 | 0.000E+00 | 1.166E+07 | 1.664E+06 | 1.757E+06 | 2.671E+06 | 3.191E+06 | 2.826E+06 | 1.244E+06 |
| SM(d18:1/26:2)+H       | SM    | (d18:1) | (26:2)        | 4.890E+08 | 1.256E+08 | 4.740E+08 | 7.306E+07 | 4.446E+06 | 8.355E+07 | 1.429E+07 | 3.375E+07 | 2.462E+07 |
| SM(d18:1/26:3)+H       | SM    | (d18:1) | (26:3)        | 3.986E+07 | 3.203E+08 | 3.236E+08 | 2.269E+08 | 3.287E+08 | 1.783E+09 | 1.648E+08 | 6.349E+08 | 6.921E+07 |
| SM(d16:0/28:4)+H       | SM    | (d16:0) | (28:4)        | 1.124E+07 | 1.118E+06 | 1.131E+07 | 8.541E+07 | 8.656E+07 | 4.948E+07 | 2.214E+07 | 1.258E+08 | 1.339E+08 |
| SM(d18:1/26:4)+H       | SM    | (d18:1) | (26:4)        | 1.574E+08 | 1.730E+08 | 2.946E+08 | 1.364E+08 | 9.891E+06 | 3.949E+08 | 2.583E+08 | 9.904E+07 | 1.279E+08 |
| SM(d18:1/26:5)+H       | SM    | (d18:1) | (26:5)        | 7.426E+07 | 4.375E+07 | 1.052E+07 | 7.423E+06 | 2.154E+07 | 4.052E+07 | 2.188E+07 | 3.599E+06 | 3.189E+06 |
| SM(d22:1/23:0)+HCOO    | SM    | (d22:1) | (23:0)        | 0.000E+00 | 0.000E+00 | 0.000E+00 | 1.890E+06 | 6.027E+05 | 3.936E+05 | 8.159E+04 | 4.564E+06 | 6.539E+06 |
| SM(d22:1/23:0)+H       | SM    | (d22:1) | (23:0)        | 1.591E+07 | 2.190E+07 | 7.030E+06 | 1.954E+07 | 1.813E+07 | 4.183E+06 | 3.061E+07 | 2.777E+07 | 4.226E+07 |
| SM(d18:1/27:1)+H       | SM    | (d18:1) | (27:1)        | 5.823E+06 | 1.070E+06 | 4.672E+03 | 3.694E+06 | 3.576E+06 | 0.000E+00 | 1.097E+07 | 2.847E+07 | 1.565E+07 |
| SM(d18:1/27:1)+HCOO    | SM    | (d18:1) | (27:1)        | 1.856E+05 | 0.000E+00 | 0.000E+00 | 7.434E+05 | 3.852E+05 | 0.000E+00 | 0.000E+00 | 4.775E+06 | 1.154E+06 |
| SM(d18:1/27:3)+H       | SM    | (d18:1) | (27:3)        | 1.922E+05 | 2.034E+05 | 4.692E+05 | 2.683E+06 | 1.078E+06 | 0.000E+00 | 4.018E+06 | 1.331E+07 | 9.221E+06 |
| SM(d18:1/27:6)+H       | SM    | (d18:1) | (27:6)        | 0.000E+00 | 0.000E+00 | 5.197E+06 | 0.000E+00 | 1.966E+06 | 1.642E+06 | 2.500E+04 | 3.466E+04 | 1.749E+04 |
| SM(d16:0/30:1)+H       | SM    | (d16:0) | (30:1)        | 2.503E+09 | 1.160E+09 | 3.889E+08 | 4.974E+07 | 1.100E+09 | 2.987E+08 | 4.786E+09 | 9.841E+08 | 2.039E+09 |
| SM(d18:1/28:3)+H       | SM    | (d18:1) | (28:3)        | 9.699E+06 | 1.651E+06 | 3.185E+07 | 8.336E+07 | 9.230E+06 | 1.308E+07 | 2.375E+07 | 7.814E+07 | 5.427E+07 |
| SM(d16:0/32:0)+H       | SM    | (d16:0) | (32:0)        | 8.257E+09 | 9.044E+09 | 3.767E+09 | 1.057E+09 | 6.560E+09 | 1.301E+09 | 1.259E+10 | 5.723E+09 | 8.884E+09 |
| SM(d20:0/32:6)+H       | SM    | (d20:0) | (32:6)        | 1.705E+08 | 2.809E+08 | 9.192E+07 | 1.253E+07 | 1.536E+08 | 5.332E+07 | 3.514E+08 | 2.333E+07 | 7.855E+07 |
| SQDQ(16:0/18:2)+H      | SQDQG | (16:0)  | (18:2)        | 5.006E+07 | 5.291E+08 | 4.874E+08 | 8.939E+08 | 1.132E+09 | 7.386E+07 | 1.435E+09 | 1.250E+09 | 1.505E+09 |
| SQDQ(16:0/20:1)+H      | SQDQG | (16:0)  | (20:1)        | 0.000E+00 | 1.637E+05 | 0.000E+00 | 5.666E+06 | 1.636E+07 | 2.492E+06 | 1.333E+07 | 2.292E+07 | 2.835E+07 |
| So(d17:1)+H            | So    | (d17:1) |               | 0.000E+00 | 3.466E+05 | 0.000E+00 | 3.236E+07 | 5.506E+07 | 4.522E+06 | 8.507E+07 | 1.458E+08 | 4.260E+08 |
| So(d18:0)+H            | So    | (d18:0) |               | 1.923E+07 | 1.784E+07 | 7.334E+06 | 1.188E+08 | 7.411E+07 | 3.333E+07 | 5.344E+07 | 1.998E+08 | 2.368E+08 |
| So(d18:1)+H            | So    | (d18:1) |               | 9.644E+07 | 5.959E+07 | 1.159E+08 | 1.001E+09 | 1.205E+09 | 5.129E+08 | 7.548E+08 | 2.085E+09 | 2.371E+09 |
| So(d25:0)+H            | So    | (d25:0) |               | 1.628E+06 | 1.293E+06 | 1.738E+07 | 8.036E+06 | 2.627E+07 | 2.039E+06 | 3.091E+06 | 1.503E+07 | 4.308E+06 |
| TG(8:0/8:0/8:0)+NH4    | TG    | (8:0)   | (8:0) (8:0)   | 5.972E+05 | 7.251E+07 | 3.884E+07 | 8.746E+07 | 4.958E+06 | 9.636E+06 | 2.443E+06 | 7.850E+07 | 2.685E+06 |
| TG(4:0/8:0/13:0)+NH4   | TG    | (4:0)   | (8:0) (13:0)  | 3.949E+06 | 4.295E+06 | 6.751E+06 | 6.451E+06 | 1.967E+07 | 1.325E+06 | 1.272E+07 | 1.373E+07 | 1.082E+07 |
| TG(4:0/8:0/21:4)+NH4   | TG    | (4:0)   | (8:0) (21:4)  | 8.548E+06 | 5.775E+06 | 2.765E+06 | 7.844E+06 | 1.038E+07 | 1.661E+07 | 4.608E+06 | 1.378E+07 | 1.455E+07 |
| TG(4:0/14:0/16:0)+NH4  | TG    | (4:0)   | (14:0) (16:0) | 3.973E+07 | 7.617E+06 | 2.338E+06 | 0.000E+00 | 7.574E+06 | 0.000E+00 | 1.668E+07 | 0.000E+00 | 2.446E+06 |
| TG(4:0/16:0/16:0)+NH4  | TG    | (4:0)   | (16:0) (16:0) | 1.126E+08 | 5.873E+07 | 3.017E+07 | 1.129E+07 | 3.669E+07 | 9.993E+06 | 2.605E+08 | 4.394E+06 | 4.611E+07 |
| TG(4:0/16:0/16:1)+NH4  | TG    | (4:0)   | (16:0) (16:1) | 1.329E+08 | 7.354E+06 | 1.665E+04 | 0.000E+00 | 1.043E+05 | 0.000E+00 | 2.239E+08 | 2.246E+06 | 9.425E+06 |
| TG(4:0/16:1/16:1)+NH4  | TG    | (4:0)   | (16:1) (16:1) | 1.729E+08 | 3.121E+07 | 3.057E+06 | 1.800E+06 | 1.887E+07 | 0.000E+00 | 2.940E+08 | 9.951E+06 | 2.836E+07 |
| TG(8:0p/10:0/18:2)+H   | TG    | (8:0p)  | (10:0) (18:2) | 7.815E+07 | 3.074E+07 | 5.363E+06 | 2.602E+06 | 8.185E+06 | 5.557E+06 | 3.608E+07 | 1.584E+07 | 6.139E+06 |
| TG(10:0p/8:0/18:3)+H   | TG    | (10:0p) | (8:0) (18:3)  | 3.339E+07 | 6.591E+06 | 0.000E+00 | 0.000E+00 | 0.000E+00 | 3.109E+06 | 3.660E+07 | 6.847E+06 | 4.078E+06 |
| TG(4:0/16:0/17:0)+NH4  | TG    | (4:0)   | (16:0) (17:0) | 1.769E+07 | 1.091E+07 | 2.574E+06 | 1.266E+07 | 2.323E+07 | 1.397E+07 | 4.521E+07 | 0.000E+00 | 6.758E+06 |
| TG(6:0/16:0/16:0)+NH4  | TG    | (6:0)   | (16:0) (16:0) | 5.056E+07 | 4.904E+07 | 3.533E+07 | 2.347E+06 | 8.994E+06 | 7.361E+06 | 1.072E+08 | 4.184E+05 | 1.467E+07 |
| TG(4:0/16:0/18:1)+NH4  | TG    | (4:0)   | (16:0) (18:1) | 5.040E+08 | 1.725E+08 | 4.396E+07 | 1.503E+07 | 5.534E+07 | 3.115E+06 | 9.891E+08 | 1.023E+08 | 1.445E+08 |
| TG(4:0/16:1/18:1)+NH4  | TG    | (4:0)   | (16:1) (18:1) | 6.410E+08 | 1.703E+08 | 1.107E+07 | 9.872E+06 | 6.909E+07 | 2.234E+06 | 9.405E+08 | 3.536E+07 | 1.573E+08 |
| TG(4:0/16:1/18:2)+NH4  | TG    | (4:0)   | (16:1) (18:2) | 1.894E+08 | 2.403E+07 | 1.495E+06 | 0.000E+00 | 1.486E+07 | 0.000E+00 | 3.404E+08 | 8.773E+06 | 2.617E+07 |
| TG(6:0/16:0/17:1)+NH4  | TG    | (6:0)   | (16:0) (17:1) | 1.185E+08 | 5.402E+07 | 3.031E+06 | 7.155E+06 | 8.908E+06 | 0.000E+00 | 2.046E+08 | 2.181E+06 | 1.509E+07 |
| TG(4:0/17:1/18:2)+NH4  | TG    | (4:0)   | (17:1) (18:2) | 2.279E+07 | 1.375E+07 | 0.000E+00 | 0.000E+00 | 4.572E+06 | 0.000E+00 | 7.176E+07 | 0.000E+00 | 0.000E+00 |
| TG(16:0/12:0/12:0)+NH4 | TG    | (16:0)  | (12:0) (12:0) | 1.838E+07 | 3.644E+07 | 2.393E+07 | 1.007E+07 | 2.386E+07 | 1.154E+07 | 2.476E+07 | 1.460E+07 | 1.685E+07 |
| TG(8:0e/16:0/16:0)+NH4 | TG    | (8:0e)  | (16:0) (16:0) | 3.320E+06 | 5.011E+06 | 7.840E+06 | 2.597E+07 | 8.163E+06 | 1.243E+07 | 0.000E+00 | 1.333E+07 | 1.183E+07 |
| TG(8:0p/16:0/16:0)+NH4 | TG    | (8:0p)  | (16:0) (16:0) | 5.452E+06 | 1.064E+07 | 1.106E+07 | 6.023E+07 | 3.895E+07 | 3.743E+07 | 2.378E+07 | 5.569E+07 | 1.070E+07 |
| TG(6:0/16:0/18:1)+NH4  | TG    | (6:0)   | (16:0) (18:1) | 1.663E+08 | 4.956E+07 | 3.665E+07 | 1.868E+06 | 1.406E+07 | 0.000E+00 | 3.487E+08 | 1.076E+07 | 3.071E+07 |
| TG(8:0e/16:0/16:1)+NH4 | TG    | (8:0e)  | (16:0) (16:1) | 5.452E+06 | 1.064E+07 | 1.106E+07 | 6.023E+07 | 3.895E+07 | 3.476E+07 | 2.378E+07 | 5.569E+07 | 1.070E+07 |
| TG(4:0/18:1/18:1)+NH4  | TG    | (4:0)   | (18:1) (18:1) | 5.236E+08 | 2.068E+08 | 4.765E+07 | 9.653E+06 | 9.868E+07 | 5.839E+06 | 9.188E+08 | 5.592E+07 | 1.861E+08 |
| TG(4:0/18:1/18:2)+NH4  | TG    | (4:0)   | (18:1) (18:2) | 4.314E+08 | 1.159E+08 | 1.832E+06 | 0.000E+00 | 3.380E+07 | 0.000E+00 | 6.159E+08 | 7.410E+06 | 8.395E+07 |
| TG(4:0/18:2/18:2)+NH4  | TG    | (4:0)   | (18:2) (18:2) | 1.289E+08 | 1.678E+07 | 6.555E+06 | 0.000E+00 | 1.591E+06 | 0.000E+00 | 2.604E+08 | 3.910E+06 | 1.547E+07 |
| TG(15:0/12:0/14:0)+NH4 | TG    | (15:0)  | (12:0) (14:0) | 3.924E+03 | 2.098E+06 | 2.903E+06 | 1.338E+07 | 0.000E+00 | 1.236E+06 | 2.329E+06 | 0.000E+00 | 0.000E+00 |
| TG(6:0/17:1/18:1)+NH4  | TG    | (6:0)   | (17:1) (18:1) | 1.076E+08 | 5.387E+07 | 3.455E+06 | 0.000E+00 | 3.465E+07 | 0.000E+00 | 1.927E+08 | 0.000E+00 | 4.419E+06 |
| TG(6:0/17:1/18:2)+NH4  | TG    | (6:0)   | (17:1) (18:2) | 9.752E+07 | 3.610E+07 | 1.818E+06 | 0.000E+00 | 9.552E+06 | 0.000E+00 | 1.773E+08 | 0.000E+00 | 5.342E+06 |
| TG(16:0/10:0/16:0)+NH4 | TG    | (16:0)  | (10:0) (16:0) | 1.707E+07 | 1.924E+07 | 3.705E+07 | 3.251E+07 | 1.644E+07 | 1.801E+07 | 3.181E+07 | 2.459E+07 | 2.977E+07 |

|                         |    |         |        |        |           |           |           |           |           |           |           |           |           |
|-------------------------|----|---------|--------|--------|-----------|-----------|-----------|-----------|-----------|-----------|-----------|-----------|-----------|
| TG(16:1/14:0/18:1)+NH4  | TG | (16:1)  | (14:0) | (18:1) | 2.448E+09 | 1.654E+09 | 1.565E+09 | 8.476E+08 | 1.766E+09 | 4.648E+08 | 4.491E+09 | 1.948E+09 | 2.586E+09 |
| TG(16:0/16:1/16:1)+NH4  | TG | (16:0)  | (16:1) | (16:1) | 3.401E+06 | 5.800E+05 | 6.891E+05 | 0.000E+00 | 4.629E+05 | 0.000E+00 | 2.790E+06 | 3.367E+05 | 6.528E+05 |
| TG(16:0/16:0/17:0)+NH4  | TG | (16:0)  | (16:0) | (17:0) | 6.142E+07 | 1.399E+08 | 8.232E+07 | 2.224E+08 | 1.127E+08 | 4.906E+07 | 1.511E+08 | 1.289E+08 | 8.444E+07 |
| TG(16:0/15:0/18:1)+NH4  | TG | (16:0)  | (15:0) | (18:1) | 1.075E+07 | 3.182E+08 | 2.447E+08 | 3.871E+08 | 2.217E+08 | 9.242E+06 | 5.777E+08 | 3.627E+08 | 4.051E+08 |
| TG(16:1/15:0/18:1)+NH4  | TG | (16:1)  | (15:0) | (18:1) | 3.346E+06 | 4.180E+08 | 2.970E+08 | 2.470E+08 | 3.274E+08 | 9.811E+07 | 7.542E+08 | 1.620E+08 | 4.562E+08 |
| TG(16:1/15:0/18:2)+NH4  | TG | (16:1)  | (15:0) | (18:2) | 2.669E+08 | 2.121E+08 | 1.221E+08 | 4.478E+07 | 1.911E+08 | 3.042E+07 | 4.543E+08 | 1.720E+08 | 3.070E+08 |
| TG(13:0/18:2/18:2)+NH4  | TG | (13:0)  | (18:2) | (18:2) | 2.305E+08 | 9.134E+07 | 1.693E+08 | 2.861E+09 | 1.359E+09 | 5.667E+08 | 1.576E+08 | 2.959E+09 | 3.775E+09 |
| TG(18:0/16:0/16:0)+NH4  | TG | (18:0)  | (16:0) | (16:0) | 8.205E+08 | 1.837E+09 | 6.848E+08 | 6.158E+08 | 1.218E+09 | 3.142E+08 | 1.609E+09 | 7.971E+08 | 1.544E+09 |
| TG(16:0p/16:0/18:0)+NH4 | TG | (16:0p) | (16:0) | (18:0) | 4.409E+05 | 1.492E+07 | 7.717E+06 | 7.288E+07 | 9.821E+07 | 2.091E+07 | 8.482E+06 | 1.080E+08 | 5.148E+07 |
| TG(16:0/16:0/18:1)+NH4  | TG | (16:0)  | (16:0) | (18:1) | 7.021E+09 | 7.425E+09 | 4.473E+09 | 3.088E+09 | 7.156E+09 | 1.923E+09 | 1.398E+10 | 5.377E+09 | 8.972E+09 |
| TG(18:1p/16:0/16:0)+NH4 | TG | (18:1p) | (16:0) | (16:0) | 0.000E+00 | 1.200E+05 | 2.570E+06 | 6.450E+07 | 5.722E+06 | 2.039E+07 | 6.212E+06 | 6.426E+07 | 1.456E+07 |
| TG(16:0/16:1/18:1)+NH4  | TG | (16:0)  | (16:1) | (18:1) | 0.000E+00 | 1.899E+06 | 1.920E+06 | 2.648E+04 | 2.970E+05 | 3.218E+06 | 2.477E+05 | 1.492E+06 | 1.824E+06 |
| TG(16:0/16:1/18:1)+NH4  | TG | (16:0)  | (16:1) | (18:1) | 9.379E+09 | 8.302E+09 | 5.877E+09 | 2.577E+09 | 8.979E+09 | 2.435E+09 | 1.877E+10 | 7.222E+09 | 1.145E+10 |
| TG(16:0/16:1/18:1)+NH4  | TG | (16:0)  | (16:1) | (18:1) | 8.625E+07 | 1.964E+07 | 5.375E+06 | 1.144E+06 | 1.965E+07 | 2.032E+06 | 5.964E+07 | 1.386E+07 | 1.439E+07 |
| TG(16:0/16:1/18:1)+NH4  | TG | (16:0)  | (16:1) | (18:1) | 8.041E+05 | 1.095E+06 | 7.461E+05 | 5.730E+04 | 1.000E+06 | 1.596E+05 | 3.460E+06 | 3.145E+05 | 1.382E+06 |
| TG(16:0e/16:0/18:2)+NH4 | TG | (16:0e) | (16:0) | (18:2) | 1.009E+04 | 3.130E+06 | 2.570E+06 | 6.450E+07 | 5.722E+06 | 2.039E+07 | 8.199E+06 | 5.080E+07 | 1.456E+07 |
| TG(16:0/16:1/18:2)+NH4  | TG | (16:0)  | (16:1) | (18:2) | 7.516E+09 | 4.922E+09 | 3.535E+09 | 9.962E+08 | 5.399E+09 | 1.181E+09 | 1.341E+10 | 5.009E+09 | 7.248E+09 |
| TG(16:1/16:1/18:2)+NH4  | TG | (16:1)  | (16:1) | (18:2) | 3.066E+09 | 1.966E+09 | 1.116E+09 | 3.532E+08 | 2.146E+09 | 3.024E+08 | 6.671E+09 | 2.308E+09 | 3.913E+09 |
| TG(16:1/16:1/18:3)+NH4  | TG | (16:1)  | (16:1) | (18:3) | 7.119E+08 | 5.236E+08 | 2.831E+08 | 4.444E+08 | 6.031E+08 | 2.613E+08 | 1.707E+09 | 2.869E+08 | 7.304E+08 |
| TG(18:0/16:0/17:0)+NH4  | TG | (18:0)  | (16:0) | (17:0) | 5.110E+07 | 2.086E+08 | 7.464E+07 | 1.305E+08 | 7.896E+07 | 2.492E+07 | 2.759E+08 | 2.128E+08 | 2.112E+08 |
| TG(18:0/16:0/17:0)+NH4  | TG | (18:0)  | (16:0) | (17:0) | 1.677E+07 | 1.512E+08 | 3.599E+07 | 1.068E+08 | 5.606E+07 | 3.380E+07 | 1.667E+08 | 5.017E+07 | 1.651E+08 |
| TG(16:0/17:0/18:1)+NH4  | TG | (16:0)  | (17:0) | (18:1) | 5.360E+08 | 5.271E+08 | 3.566E+08 | 2.111E+08 | 4.314E+08 | 1.226E+08 | 7.694E+08 | 4.003E+08 | 6.397E+08 |
| TG(16:0/17:1/18:1)+NH4  | TG | (16:0)  | (17:1) | (18:1) | 8.305E+08 | 8.720E+08 | 5.284E+08 | 2.688E+08 | 5.818E+08 | 1.897E+08 | 1.226E+09 | 6.038E+08 | 7.740E+08 |
| TG(15:0/18:1/18:2)+NH4  | TG | (15:0)  | (18:1) | (18:2) | 8.880E+08 | 8.475E+08 | 3.345E+08 | 1.183E+08 | 5.498E+08 | 1.408E+08 | 1.478E+09 | 5.670E+08 | 1.009E+09 |
| TG(15:0/18:2/18:2)+NH4  | TG | (15:0)  | (18:2) | (18:2) | 4.934E+08 | 4.086E+08 | 1.465E+08 | 9.028E+06 | 2.507E+08 | 2.355E+06 | 7.313E+08 | 1.883E+08 | 3.58E+08  |
| TG(15:1/18:2/18:2)+NH4  | TG | (15:1)  | (18:2) | (18:2) | 4.935E+07 | 8.669E+07 | 1.274E+07 | 3.776E+06 | 7.586E+07 | 4.764E+04 | 2.132E+08 | 1.614E+07 | 9.009E+07 |
| TG(18:0/16:0/18:0)+NH4  | TG | (18:0)  | (16:0) | (18:0) | 0.000E+00 | 3.637E+06 | 1.339E+08 | 0.000E+00 | 6.602E+06 | 1.825E+07 | 0.000E+00 | 3.908E+06 | 0.000E+00 |
| TG(18:0/16:0/18:1)+NH4  | TG | (18:0)  | (16:0) | (18:1) | 3.807E+09 | 7.201E+09 | 2.200E+09 | 1.258E+09 | 4.562E+09 | 8.925E+08 | 9.266E+09 | 1.897E+09 | 6.674E+09 |
| TG(18:0p/16:0/18:1)+NH4 | TG | (18:0p) | (16:0) | (18:1) | 4.100E+06 | 2.938E+07 | 1.072E+07 | 8.355E+07 | 1.185E+08 | 3.441E+07 | 2.810E+07 | 1.040E+08 | 7.973E+07 |
| TG(16:0/18:1/18:1)+NH4  | TG | (16:0)  | (18:1) | (18:1) | 1.547E+10 | 1.566E+10 | 9.171E+09 | 3.964E+09 | 1.445E+10 | 3.745E+09 | 2.931E+10 | 1.043E+10 | 2.152E+10 |
| TG(16:0e/18:1/18:1)+NH4 | TG | (16:0e) | (18:1) | (18:1) | 4.100E+06 | 2.499E+07 | 1.084E+07 | 8.483E+07 | 1.202E+08 | 2.624E+07 | 9.710E+05 | 1.040E+08 | 2.366E+07 |
| TG(16:0p/18:1/18:1)+NH4 | TG | (16:0p) | (18:1) | (18:1) | 1.794E+06 | 2.053E+06 | 4.022E+06 | 8.116E+07 | 2.423E+07 | 1.245E+07 | 6.697E+06 | 5.120E+07 | 1.499E+07 |
| TG(16:0/18:1/18:2)+NH4  | TG | (16:0)  | (18:1) | (18:2) | 2.520E+10 | 2.027E+10 | 1.100E+10 | 3.373E+09 | 1.740E+10 | 4.210E+09 | 3.544E+10 | 1.252E+10 | 2.235E+10 |
| TG(16:0/16:0/20:3)+H    | TG | (16:0)  | (16:0) | (20:3) | 1.093E+07 | 4.376E+07 | 6.787E+06 | 1.358E+07 | 5.990E+06 | 3.338E+06 | 4.320E+07 | 3.988E+07 | 1.243E+07 |
| TG(16:0/18:1/18:2)+NH4  | TG | (16:0)  | (18:1) | (18:2) | 6.808E+07 | 1.480E+07 | 6.471E+06 | 1.133E+06 | 4.410E+07 | 4.411E+06 | 6.535E+06 | 4.409E+07 | 1.171E+07 |
| TG(16:0/18:1/18:3)+NH4  | TG | (16:0)  | (18:1) | (18:2) | 1.199E+07 | 3.000E+06 | 1.309E+06 | 3.541E+05 | 9.948E+05 | 4.477E+05 | 3.645E+06 | 6.864E+05 | 1.847E+06 |
| TG(16:0e/18:1/18:2)+NH4 | TG | (16:0e) | (18:1) | (18:2) | 0.000E+00 | 1.376E+07 | 6.239E+06 | 5.686E+07 | 1.605E+07 | 1.804E+07 | 9.260E+06 | 4.636E+07 | 9.776E+06 |
| TG(16:1/18:1/18:2)+NH4  | TG | (16:1)  | (18:1) | (18:2) | 1.495E+10 | 1.186E+10 | 5.819E+09 | 1.475E+09 | 1.095E+10 | 2.058E+09 | 2.856E+10 | 7.458E+09 | 1.405E+10 |
| TG(16:1/18:2/18:2)+NH4  | TG | (16:1)  | (18:2) | (18:2) | 2.102E+10 | 4.116E+09 | 2.286E+08 | 2.354E+08 | 3.617E+09 | 5.012E+08 | 1.037E+10 | 1.906E+09 | 3.979E+09 |
| TG(16:1/18:2/18:3)+NH4  | TG | (16:1)  | (18:2) | (18:3) | 9.816E+08 | 1.670E+08 | 1.050E+08 | 3.142E+06 | 6.203E+07 | 2.089E+07 | 6.528E+08 | 1.273E+08 | 1.913E+08 |
| TG(18:4/16:1/18:2)+NH4  | TG | (18:4)  | (16:1) | (18:2) | 5.324E+07 | 1.201E+08 | 1.509E+07 | 1.330E+06 | 7.091E+06 | 5.548E+06 | 3.930E+08 | 8.876E+06 | 2.717E+07 |
| TG(16:0/16:0/21:0)+NH4  | TG | (16:0)  | (16:0) | (21:0) | 3.037E+08 | 3.761E+08 | 6.915E+08 | 1.692E+09 | 3.948E+08 | 2.568E+08 | 4.871E+08 | 5.742E+08 | 1.827E+08 |
| TG(18:0/17:0/18:1)+NH4  | TG | (18:0)  | (17:0) | (18:1) | 4.911E+08 | 6.627E+08 | 2.809E+08 | 1.337E+08 | 3.883E+08 | 3.884E+07 | 7.680E+08 | 4.652E+08 | 7.051E+08 |
| TG(17:0/18:1/18:1)+NH4  | TG | (17:0)  | (18:1) | (18:1) | 9.258E+08 | 8.504E+08 | 9.403E+08 | 4.354E+08 | 9.143E+08 | 3.497E+08 | 8.572E+08 | 8.985E+08 | 1.042E+09 |
| TG(17:0/18:1/18:1)+NH4  | TG | (17:0)  | (18:1) | (18:1) | 8.874E+08 | 1.106E+09 | 5.314E+08 | 1.687E+08 | 6.362E+08 | 1.564E+08 | 1.292E+09 | 5.145E+08 | 1.125E+09 |
| TG(17:1/18:1/18:1)+NH4  | TG | (17:1)  | (18:1) | (18:1) | 8.035E+08 | 1.083E+09 | 4.537E+08 | 1.464E+08 | 1.363E+08 | 1.145E+07 | 1.426E+09 | 4.892E+08 | 1.123E+09 |
| TG(17:1/18:1/18:2)+NH4  | TG | (17:1)  | (18:1) | (18:2) | 6.860E+08 | 4.437E+08 | 2.532E+08 | 1.335E+08 | 4.651E+08 | 1.968E+07 | 1.164E+09 | 3.553E+08 | 7.095E+08 |
| TG(17:1/18:2/18:2)+NH4  | TG | (17:1)  | (18:2) | (18:2) | 5.940E+07 | 4.815E+07 | 1.109E+08 | 1.342E+06 | 1.582E+08 | 1.014E+07 | 1.567E+08 | 7.654E+07 | 2.455E+08 |
| TG(17:1/18:2/18:3)+NH4  | TG | (17:1)  | (18:2) | (18:3) | 2.254E+07 | 4.674E+07 | 1.905E+06 | 1.402E+06 | 8.979E+06 | 2.394E+06 | 8.324E+07 | 2.598E+06 | 6.501E+06 |
| TG(15:0/18:2/20:5)+NH4  | TG | (15:0)  | (18:2) | (20:5) | 1.028E+07 | 1.223E+07 | 4.671E+07 | 2.027E+05 | 1.890E+06 | 2.051E+07 | 4.074E+06 | 4.210E+07 | 5.831E+07 |
| TG(18:0/18:0/18:0)+NH4  | TG | (18:0)  | (18:0) | (18:0) | 0.000E+00 | 0.000E+00 | 1.974E+07 | 0.000E+00 | 5.900E+06 | 4.813E+06 | 0.000E+00 | 0.000E+00 | 4.776E+04 |
| TG(18:0/18:0/18:1)+NH4  | TG | (18:0)  | (18:0) | (18:1) | 0.000E+00 | 1.619E+07 | 1.377E+09 | 0.000E+00 | 5.388E+06 | 1.545E+07 | 0.000E+00 | 1.380E+08 | 0.000E+00 |
| TG(18:0/18:1/18:1)+NH4  | TG | (18:0)  | (18:1) | (18:1) | 6.298E+09 | 1.012E+10 | 2.822E+09 | 1.378E+09 | 6.127E+09 | 1.105E+09 | 1.100E+10 | 2.974E+09 | 9.511E+09 |
| TG(18:1/18:1/18:1)+NH4  | TG | (18:1)  | (18:1) | (18:1) | 0.000E+00 | 9.794E+05 | 1.776E+06 | 0.000E+00 | 0.000E+00 | 7.533E+05 | 0.000E+00 | 1.730E+06 | 0.000E+00 |
| TG(18:0/18:1/18:2)+NH4  | TG | (18:0)  | (18:1) | (18:2) | 1.414E+10 | 1.514E+10 | 6.604E+09 | 2.757E+09 | 1.265E+10 | 2.657E+09 | 2.062E+10 | 1.010E+10 | 1.608E+10 |
| TG(18:0e/18:1/18:2)+NH4 | TG | (18:0e) | (18:1) | (18:2) | 3.957E+05 | 2.225E+06 | 7.565E+05 | 6.505E+07 | 3.591E+07 | 1.350E+07 | 3.092E+06 | 2.808E+07 | 1.780E+07 |
| TG(18:1/18:1/18:2)+NH4  | TG | (18:1)  | (18:1) | (18:2) | 1.524E+10 | 1.594E+10 | 6.106E+09 | 2.161E+09 | 1.346E+10 | 2.898E+09 | 2.440E+10 | 7.823E+09 | 1.700E+10 |
| TG(18:0/18:1/18:3)+H    | TG | (18:0)  | (18:1) | (18:3) | 1.753E+08 | 3.057E+08 | 4.246E+07 | 4.389E+07 | 1.127E+08 | 9.959E+06 | 3.359E+08 | 2.442E+06 | 1.319E+08 |
| TG(18:1/18:1/18:2)+NH4  | TG | (18:1)  | (18:1) | (18:2) | 8.804E+07 | 4.187E+07 | 7.934E+06 | 1.006E+06 | 6.398E+06 | 6.239E+06 | 9.953E+07 | 2.988E+07 | 6.877E+06 |
| TG(18:1/18:2/18:2)+NH4  | TG | (18:1)  | (18:2) | (18:2) | 1.111E+10 | 1.034E+10 | 4.158E+09 | 1.168E+09 | 9.243E+09 | 1.753E+09 | 1.934E+10 | 5.008E+09 | 1.096E+10 |
| TG(18:1/18:2/18:2)+H    | TG | (18:1)  | (18:2) | (18:2) | 1.660E+07 | 6.481E+06 | 2.278E+06 | 0.000E+00 | 4.428E+06 | 0.000E+00 | 1.017E+07 | 0.000E+00 | 5.775E+04 |
| TG(16:0/18:0/20:1)+NH4  | TG | (16:0)  | (18:0) | (20:1) | 1.452E+08 | 5.917E+07 | 1.018E+08 | 4.034E+07 | 5.936E+07 | 6.324E+07 | 6.631E+07 | 1.541E+08 | 5.412E+07 |
| TG(18:2/18:2/18:2)+NH4  | TG | (18:2)  | (18:2) | (18:2) | 6.659E+09 | 7.495E+08 | 1.358E+09 | 1.399E+08 | 3.521E+09 | 5.036E+08 | 1.546E+10 | 1.606E+09 | 6.009E+09 |
| TG(18:2/18:2/18:2)+H    | TG | (18:2)  | (18:2) | (18:2) | 1.519E+08 | 4.128E+07 | 4.357E+08 | 2.137E+08 | 1.525E+08 | 1.102E+08 | 5.023E+07 | 2.484E+07 | 8.279E+07 |
| TG(18:3/18:2/18:2)+NH4  | TG | (18:3)  | (18:2) | (18:2) | 1.491E+09 | 5.004E+09 | 2.762E+08 | 1.469E+08 | 4.974E+08 | 4.054E+07 | 2.084E+09 | 1.820E+08 | 5.515E+08 |
| TG(18:3/18:2/18:3)+NH4  | TG | (18:3)  | (18:2) | (18:3) | 2.731E+08 | 9.797E+07 | 9.628E+07 | 0.000E+00 | 1.276E+08 | 2.939E+07 | 6.607E+08 | 1.774E+06 | 1.514E+08 |
| TG                      |    |         |        |        |           |           |           |           |           |           |           |           |           |

|                        |       |         |        |        |           |           |           |           |           |           |           |           |           |
|------------------------|-------|---------|--------|--------|-----------|-----------|-----------|-----------|-----------|-----------|-----------|-----------|-----------|
| TG(20:1/18:2/20:1)+NH4 | TG    | (20:1)  | (18:2) | (20:1) | 1.536E+08 | 1.551E+08 | 1.249E+08 | 1.483E+08 | 2.135E+08 | 8.570E+07 | 1.625E+08 | 6.977E+07 | 2.735E+08 |
| TG(20:1/18:2/20:2)+NH4 | TG    | (20:1)  | (18:2) | (20:2) | 1.131E+07 | 2.515E+07 | 2.489E+07 | 2.476E+08 | 3.497E+07 | 2.713E+07 | 3.241E+07 | 2.242E+07 | 9.067E+07 |
| TG(18:0/18:1/22:5)+NH4 | TG    | (18:0)  | (18:1) | (22:5) | 1.154E+07 | 2.028E+08 | 1.706E+08 | 4.112E+08 | 2.662E+08 | 1.933E+08 | 1.443E+08 | 1.434E+08 | 1.781E+08 |
| TG(18:1/18:1/22:5)+NH4 | TG    | (18:1)  | (18:1) | (22:5) | 1.267E+08 | 4.584E+08 | 2.401E+08 | 3.256E+08 | 4.882E+08 | 4.568E+08 | 2.397E+08 | 4.218E+08 | 5.493E+08 |
| TG(18:1/18:1/22:6)+NH4 | TG    | (18:1)  | (18:1) | (22:6) | 4.788E+08 | 7.245E+08 | 7.781E+08 | 9.010E+07 | 4.836E+08 | 5.336E+08 | 6.044E+08 | 5.883E+08 | 7.507E+08 |
| TG(22:5/18:2/18:2)+NH4 | TG    | (22:5)  | (18:2) | (18:2) | 1.286E+08 | 1.252E+09 | 6.480E+08 | 2.372E+06 | 5.870E+08 | 3.015E+08 | 1.546E+08 | 3.724E+08 | 7.537E+08 |
| TG(16:0/20:5/23:3)+NH4 | TG    | (16:0)  | (20:5) | (23:3) | 6.675E+07 | 9.487E+07 | 7.229E+07 | 9.311E+06 | 5.065E+07 | 3.569E+07 | 7.990E+07 | 4.116E+07 | 5.868E+07 |
| TG(20:2/18:2/22:6)+NH4 | TG    | (20:2)  | (18:2) | (22:6) | 1.332E+07 | 4.170E+07 | 1.929E+08 | 7.743E+07 | 9.298E+07 | 2.783E+08 | 3.141E+07 | 4.772E+07 | 6.301E+07 |
| TG(18:1/20:4/22:6)+NH4 | TG    | (18:1)  | (20:4) | (22:6) | 3.709E+07 | 1.236E+08 | 1.740E+08 | 6.438E+07 | 8.777E+07 | 1.640E+08 | 1.369E+08 | 1.010E+08 | 6.399E+07 |
| TG(16:0/22:6/22:6)+NH4 | TG    | (16:0)  | (22:6) | (22:6) | 2.092E+07 | 1.348E+08 | 2.618E+07 | 1.083E+07 | 1.548E+07 | 1.917E+07 | 7.263E+07 | 9.771E+06 | 4.990E+06 |
| TG(16:1/22:6/22:6)+NH4 | TG    | (16:1)  | (22:6) | (22:6) | 0.000E+00 | 1.224E+07 | 6.299E+06 | 0.000E+00 | 0.000E+00 | 4.912E+06 | 2.103E+07 | 2.036E+06 | 0.000E+00 |
| TG(20:5/20:5/20:5)+NH4 | TG    | (20:5)  | (20:5) | (20:5) | 0.000E+00 | 0.000E+00 | 2.521E+06 | 4.235E+07 | 2.130E+06 | 1.519E+06 | 0.000E+00 | 4.333E+06 | 7.375E+04 |
| TG(18:1/18:1/24:0)+NH4 | TG    | (18:1)  | (18:1) | (24:0) | 0.000E+00 | 0.000E+00 | 0.000E+00 | 0.000E+00 | 9.980E+06 | 9.267E+07 | 0.000E+00 | 0.000E+00 | 2.234E+06 |
| TG(18:1/18:1/24:1)+NH4 | TG    | (18:1)  | (18:1) | (24:1) | 0.000E+00 | 0.000E+00 | 1.346E+07 | 0.000E+00 | 4.784E+06 | 3.975E+07 | 0.000E+00 | 0.000E+00 | 8.114E+04 |
| TG(18:1/18:2/24:1)+NH4 | TG    | (18:1)  | (18:2) | (24:1) | 2.326E+06 | 2.100E+07 | 2.606E+07 | 2.378E+07 | 1.035E+08 | 1.512E+07 | 2.124E+07 | 1.787E+07 | 8.820E+07 |
| TG(18:1/20:3/22:1)+NH4 | TG    | (18:1)  | (20:3) | (22:1) | 2.404E+06 | 2.104E+06 | 4.675E+06 | 1.030E+08 | 4.704E+07 | 1.632E+07 | 3.955E+06 | 1.123E+07 | 1.314E+07 |
| TG(20:1/18:1/22:4)+NH4 | TG    | (20:1)  | (18:1) | (22:4) | 0.000E+00 | 2.698E+06 | 4.533E+04 | 5.798E+07 | 1.043E+07 | 6.352E+06 | 5.036E+04 | 1.901E+07 | 3.827E+06 |
| TG(20:1/18:1/22:5)+NH4 | TG    | (20:1)  | (18:1) | (22:5) | 2.437E+04 | 1.420E+07 | 1.419E+07 | 4.216E+07 | 1.419E+07 | 5.339E+07 | 5.720E+06 | 1.924E+07 | 3.136E+07 |
| TG(20:1/18:1/22:6)+NH4 | TG    | (20:1)  | (18:1) | (22:6) | 6.074E+06 | 2.021E+07 | 1.984E+07 | 1.841E+07 | 3.680E+07 | 7.261E+07 | 1.380E+07 | 1.443E+07 | 1.118E+07 |
| TG(18:1/18:2/24:0)+NH4 | TG    | (18:1)  | (18:2) | (24:0) | 3.143E+07 | 4.116E+07 | 3.303E+07 | 5.785E+07 | 2.655E+07 | 6.524E+07 | 3.446E+07 | 9.877E+06 | 3.822E+07 |
| TG(18:1/22:4/22:6)+NH4 | TG    | (18:1)  | (22:4) | (22:6) | 0.000E+00 | 3.117E+04 | 2.654E+07 | 1.544E+07 | 2.111E+07 | 1.339E+08 | 5.813E+06 | 1.171E+07 | 1.144E+07 |
| TG(18:1/22:5/22:6)+NH4 | TG    | (18:1)  | (22:5) | (22:6) | 4.421E+06 | 3.207E+07 | 3.574E+07 | 1.157E+07 | 2.715E+07 | 9.208E+07 | 1.926E+07 | 1.530E+07 | 1.390E+07 |
| TG(18:1/22:6/22:6)+NH4 | TG    | (18:1)  | (22:6) | (22:6) | 3.677E+06 | 1.027E+07 | 3.505E+06 | 0.000E+00 | 2.945E+07 | 1.811E+07 | 3.263E+07 | 1.633E+06 | 2.259E+06 |
| TG(18:1/22:6/22:6)+NH4 | TG    | (18:1)  | (22:6) | (22:6) | 1.363E+06 | 1.613E+07 | 2.450E+07 | 1.588E+06 | 4.317E+06 | 7.518E+07 | 2.381E+07 | 7.079E+06 | 3.591E+06 |
| TG(16:0/22:6/24:1)+NH4 | TG    | (16:0)  | (22:6) | (24:1) | 0.000E+00 | 0.000E+00 | 8.369E+06 | 1.850E+07 | 5.603E+06 | 1.234E+07 | 0.000E+00 | 1.931E+07 | 2.300E+06 |
| TG(18:0/22:4/22:5)+NH4 | TG    | (18:0)  | (22:4) | (22:5) | 0.000E+00 | 1.267E+06 | 4.232E+04 | 5.877E+06 | 0.000E+00 | 3.036E+07 | 0.000E+00 | 0.000E+00 | 0.000E+00 |
| TG(22:4/20:4/22:4)+NH4 | TG    | (22:4)  | (20:4) | (22:4) | 0.000E+00 | 1.376E+06 | 2.704E+06 | 0.000E+00 | 0.000E+00 | 2.929E+07 | 0.000E+00 | 0.000E+00 | 2.396E+06 |
| TG(18:1/22:6/24:1)+NH4 | TG    | (18:1)  | (22:6) | (24:1) | 0.000E+00 | 0.000E+00 | 0.000E+00 | 1.280E+06 | 0.000E+00 | 5.032E+06 | 0.000E+00 | 1.438E+06 | 4.546E+06 |
| cPA(18:0)-H            | cPA   | (18:0)  |        |        | 1.573E+05 | 0.000E+00 | 0.000E+00 | 1.639E+06 | 8.726E+05 | 2.892E+06 | 3.423E+05 | 4.780E+05 | 2.046E+05 |
| cPA(18:1)-H            | cPA   | (18:1)  |        |        | 1.085E+05 | 0.000E+00 | 1.181E+05 | 2.058E+06 | 1.098E+06 | 1.283E+06 | 1.829E+06 | 1.386E+07 | 1.262E+06 |
| cPA(18:2)-H            | cPA   | (18:2)  |        |        | 0.000E+00 | 0.000E+00 | 0.000E+00 | 0.000E+00 | 2.659E+05 | 0.000E+00 | 2.723E+05 | 8.575E+05 | 2.320E+05 |
| dMePE(16:0/16:0)-H     | dMePE | (16:0)  | (16:0) |        | 2.080E+07 | 5.724E+06 | 3.855E+06 | 6.345E+06 | 1.856E+06 | 2.169E+07 | 4.488E+06 | 6.590E+06 | 5.115E+06 |
| dMePE(16:0/16:1)-H     | dMePE | (16:0)  | (16:1) |        | 3.789E+05 | 6.575E+05 | 7.703E+05 | 1.670E+06 | 1.668E+06 | 2.154E+06 | 3.553E+05 | 1.089E+06 | 1.605E+06 |
| dMePE(16:0/18:1)-H     | dMePE | (16:0)  | (18:1) |        | 1.955E+07 | 2.664E+07 | 3.590E+07 | 1.237E+07 | 3.067E+07 | 3.144E+07 | 4.438E+07 | 1.745E+07 | 4.771E+07 |
| dMePE(16:0/18:1)-H     | dMePE | (16:0)  | (18:1) |        | 1.413E+09 | 8.636E+08 | 1.000E+09 | 2.538E+09 | 2.446E+09 | 1.679E+09 | 2.151E+09 | 3.130E+09 | 3.501E+09 |
| dMePE(16:0/18:2)-H     | dMePE | (16:0)  | (18:2) |        | 1.829E+06 | 3.416E+06 | 2.132E+07 | 9.266E+06 | 1.635E+07 | 3.837E+06 | 2.204E+07 | 6.270E+07 | 6.270E+07 |
| dMePE(16:1/18:1)-H     | dMePE | (16:1)  | (18:1) |        | 1.074E+09 | 9.610E+08 | 1.078E+09 | 1.730E+09 | 2.265E+09 | 1.211E+09 | 1.182E+09 | 2.081E+09 | 2.749E+09 |
| dMePE(16:1/18:2)-H     | dMePE | (16:1)  | (18:2) |        | 7.232E+08 | 6.910E+08 | 7.229E+08 | 6.728E+08 | 1.553E+09 | 3.200E+08 | 7.218E+08 | 1.039E+09 | 6.921E+08 |
| dMePE(15:1/20:4)-H     | dMePE | (15:1)  | (20:4) |        | 3.896E+07 | 3.725E+07 | 4.445E+07 | 6.664E+07 | 3.967E+07 | 2.098E+07 | 5.820E+07 | 4.551E+07 | 8.364E+07 |
| dMePE(18:1/18:1)-H     | dMePE | (18:1)  | (18:1) |        | 1.011E+06 | 9.087E+05 | 1.301E+06 | 7.241E+06 | 6.323E+06 | 1.998E+06 | 2.417E+06 | 5.989E+06 | 7.470E+06 |
| dMePE(18:1/18:2)-H     | dMePE | (18:1)  | (18:2) |        | 8.101E+05 | 3.547E+06 | 8.777E+05 | 8.377E+05 | 1.827E+06 | 3.818E+06 | 3.391E+06 | 1.152E+06 | 3.718E+06 |
| dMePE(18:2/18:2)-H     | dMePE | (18:2)  | (18:2) |        | 1.569E+08 | 8.194E+06 | 5.615E+08 | 6.788E+07 | 1.062E+08 | 2.532E+07 | 7.716E+07 | 7.781E+07 | 1.359E+08 |
| dMePE(16:0/20:5)-H     | dMePE | (16:0)  | (20:5) |        | 1.249E+07 | 1.950E+07 | 1.088E+07 | 5.394E+06 | 1.944E+07 | 5.379E+06 | 5.929E+06 | 5.225E+06 | 1.883E+07 |
| dMePE(16:1/20:4)-H     | dMePE | (16:1)  | (20:4) |        | 1.254E+08 | 1.087E+08 | 2.062E+08 | 1.397E+08 | 2.021E+08 | 1.594E+08 | 1.456E+08 | 1.363E+08 | 1.499E+08 |
| dMePE(16:0/20:5)-H     | dMePE | (16:0)  | (20:5) |        | 3.758E+08 | 7.740E+07 | 3.830E+08 | 2.138E+08 | 8.596E+07 | 1.772E+08 | 9.092E+07 | 2.138E+08 | 1.111E+08 |
| dMePE(16:1p/20:4)-H    | dMePE | (16:1p) | (20:4) |        | 1.173E+06 | 5.189E+05 | 3.842E+06 | 2.099E+07 | 1.187E+07 | 2.372E+05 | 4.408E+07 | 1.060E+08 | 1.064E+08 |
| dMePE(15:1/22:6)-H     | dMePE | (15:1)  | (22:6) |        | 6.225E+04 | 4.447E+06 | 1.832E+07 | 9.396E+06 | 3.223E+07 | 2.616E+06 | 2.524E+07 | 9.196E+06 | 5.640E+07 |
| dMePE(18:1/20:4)-H     | dMePE | (18:1)  | (20:4) |        | 1.751E+08 | 1.693E+08 | 1.979E+08 | 3.461E+08 | 2.476E+08 | 2.805E+08 | 1.681E+08 | 2.854E+08 | 1.127E+08 |
| dMePE(18:1p/20:4)-H    | dMePE | (18:1p) | (20:4) |        | 1.230E+07 | 3.663E+07 | 3.847E+07 | 1.118E+08 | 1.641E+08 | 7.655E+07 | 1.574E+08 | 2.581E+08 | 6.659E+07 |
| dMePE(18:1/20:5)-H     | dMePE | (18:1)  | (20:5) |        | 3.454E+06 | 4.048E+06 | 2.641E+07 | 1.699E+05 | 7.167E+05 | 6.608E+05 | 1.251E+05 | 1.097E+06 | 1.175E+06 |
| dMePE(18:2/20:4)-H     | dMePE | (18:2)  | (20:4) |        | 6.720E+07 | 8.081E+07 | 3.710E+07 | 2.522E+07 | 1.145E+08 | 3.535E+07 | 7.246E+07 | 1.376E+08 | 5.915E+07 |
| dMePE(18:2p/22:6)-H    | dMePE | (18:2p) | (22:6) |        | 2.984E+07 | 3.482E+07 | 2.448E+07 | 1.903E+07 | 3.617E+07 | 6.341E+06 | 2.139E+07 | 3.926E+07 | 1.421E+07 |
| dMePE(30:1/18:1)-H     | dMePE | (30:1)  | (18:1) |        | 5.267E+06 | 1.401E+07 | 3.471E+06 | 1.871E+07 | 1.735E+07 | 3.166E+06 | 4.399E+07 | 1.567E+07 | 1.583E+07 |
| dMePE(30:6/18:1)-H     | dMePE | (30:6)  | (18:1) |        | 1.122E+07 | 4.339E+07 | 5.377E+06 | 1.132E+07 | 2.282E+07 | 1.643E+07 | 2.105E+07 | 1.117E+07 | 5.328E+06 |
| dMePE(30:6/18:1)-H     | dMePE | (30:6)  | (18:1) |        | 1.424E+06 | 2.827E+06 | 2.363E+06 | 8.561E+06 | 1.378E+07 | 2.794E+06 | 6.173E+06 | 1.409E+06 | 3.253E+06 |
| dMePE(30:6/18:1)-H     | dMePE | (30:6)  | (18:1) |        | 3.248E+06 | 2.827E+06 | 3.998E+06 | 5.561E+06 | 4.389E+06 | 7.873E+05 | 8.030E+06 | 4.478E+06 | 2.092E+06 |
| dMePE(32:1/18:1)-H     | dMePE | (32:1)  | (18:1) |        | 1.174E+06 | 6.211E+06 | 6.063E+06 | 7.236E+06 | 6.552E+06 | 2.101E+06 | 1.188E+07 | 7.980E+06 | 7.437E+06 |
| dMePE(32:2/18:1)-H     | dMePE | (32:2)  | (18:1) |        | 2.345E+06 | 8.200E+06 | 2.724E+06 | 5.706E+06 | 9.747E+06 | 5.714E+05 | 2.302E+07 | 5.375E+06 | 3.226E+06 |
| dMePE(30:1/20:4)-H     | dMePE | (30:1)  | (20:4) |        | 7.390E+05 | 4.782E+06 | 1.746E+06 | 2.331E+06 | 1.915E+06 | 0.000E+00 | 6.665E+06 | 2.470E+06 | 3.454E+06 |
| dMePE(32:1/20:4)-H     | dMePE | (32:1)  | (20:4) |        | 3.219E+06 | 5.165E+06 | 5.647E+06 | 7.801E+06 | 3.782E+06 | 4.228E+06 | 7.258E+06 | 4.844E+06 | 3.124E+06 |
| dMePE(32:2/20:4)-H     | dMePE | (32:2)  | (20:4) |        | 1.572E+06 | 5.567E+05 | 2.775E+06 | 4.479E+06 | 3.290E+06 | 3.132E+06 | 8.227E+05 | 2.683E+05 | 5.350E+06 |
| dMePE(30:1/22:6)-H     | dMePE | (30:1)  | (22:6) |        | 8.708E+05 | 3.568E+06 | 1.933E+06 | 7.538E+06 | 9.802E+06 | 1.889E+06 | 2.518E+07 | 1.209E+07 | 1.191E+07 |
| dMePE(32:2/22:6)-H     | dMePE | (32:2)  | (22:6) |        | 0.000E+00 | 1.351E+06 | 1.868E+06 | 8.264E+06 | 5.967E+06 | 1.810E+06 | 2.630E+07 | 8.210E+06 | 7.575E+06 |

Supplementary Table 6: Merge lipidomic results of lipid classes from Supplementary Table 5

| Class      | # of Lipid ions | Wt.1      | Wt.2      | Wt.3      | Pten.KO.1 | Pten.KO.2 | Pten.KO.3 | Pten.Pml.KO.1 | Pten.Pml.KO.2 | Pten.Pml.KO.3 |
|------------|-----------------|-----------|-----------|-----------|-----------|-----------|-----------|---------------|---------------|---------------|
| PC         | 432             | 6.617E+11 | 6.030E+11 | 7.286E+11 | 7.370E+11 | 7.219E+11 | 6.029E+11 | 6.966E+11     | 8.031E+11     | 9.084E+11     |
| SM         | 106             | 1.918E+11 | 1.661E+11 | 1.887E+11 | 3.041E+11 | 2.633E+11 | 2.001E+11 | 2.631E+11     | 4.823E+11     | 4.675E+11     |
| PE         | 213             | 1.861E+11 | 1.610E+11 | 1.870E+11 | 1.982E+11 | 2.004E+11 | 1.587E+11 | 1.995E+11     | 2.180E+11     | 2.259E+11     |
| TG         | 184             | 2.122E+11 | 1.946E+11 | 1.043E+11 | 6.247E+10 | 1.707E+11 | 5.100E+10 | 3.426E+11     | 1.413E+11     | 2.397E+11     |
| LPC        | 90              | 2.901E+10 | 2.407E+10 | 3.015E+10 | 4.460E+10 | 5.002E+10 | 2.432E+10 | 4.063E+10     | 7.606E+10     | 6.546E+10     |
| DG         | 90              | 5.307E+10 | 1.558E+10 | 1.000E+10 | 1.290E+10 | 1.922E+10 | 1.257E+10 | 2.755E+10     | 1.863E+10     | 2.327E+10     |
| PI         | 124             | 2.468E+10 | 1.052E+10 | 1.923E+10 | 2.392E+10 | 2.236E+10 | 1.569E+10 | 2.327E+10     | 3.689E+10     | 3.425E+10     |
| PG         | 90              | 8.834E+09 | 6.433E+09 | 1.014E+10 | 1.746E+10 | 2.021E+10 | 1.261E+10 | 2.705E+10     | 4.332E+10     | 4.141E+10     |
| Cer        | 28              | 4.866E+09 | 4.215E+09 | 6.429E+09 | 1.512E+10 | 7.457E+09 | 1.170E+10 | 1.262E+10     | 1.002E+10     | 7.263E+09     |
| PS         | 137             | 2.014E+09 | 4.140E+09 | 8.753E+09 | 8.951E+09 | 1.449E+10 | 1.760E+10 | 1.014E+10     | 1.702E+10     | 3.089E+10     |
| dMePE      | 32              | 4.285E+09 | 3.231E+09 | 4.456E+09 | 6.105E+09 | 7.475E+09 | 4.115E+09 | 5.156E+09     | 7.694E+09     | 8.055E+09     |
| CerG1      | 14              | 3.475E+09 | 4.128E+09 | 2.551E+09 | 2.386E+09 | 2.141E+09 | 2.744E+09 | 2.472E+09     | 3.104E+09     | 2.375E+09     |
| MGDG       | 2               | 2.953E+09 | 3.347E+09 | 3.763E+09 | 2.922E+09 | 3.883E+09 | 2.346E+09 | 2.975E+09     | 3.729E+09     | 3.733E+09     |
| LPE        | 33              | 2.052E+09 | 1.641E+09 | 2.477E+09 | 5.789E+09 | 5.396E+09 | 2.389E+09 | 3.181E+09     | 6.222E+09     | 5.289E+09     |
| PA         | 18              | 1.096E+09 | 1.190E+09 | 1.031E+09 | 1.820E+09 | 2.841E+09 | 9.521E+08 | 1.572E+09     | 1.924E+09     | 1.736E+09     |
| ChE        | 9               | 4.430E+07 | 2.909E+08 | 1.778E+09 | 1.708E+09 | 5.474E+08 | 1.303E+09 | 8.991E+07     | 1.954E+09     | 7.393E+08     |
| SQDG       | 2               | 5.006E+07 | 5.293E+08 | 4.874E+08 | 8.995E+08 | 1.148E+09 | 7.635E+07 | 1.449E+09     | 1.273E+09     | 1.533E+09     |
| MG         | 7               | 4.763E+08 | 1.337E+08 | 7.605E+07 | 2.699E+08 | 3.948E+08 | 1.850E+08 | 6.973E+08     | 5.259E+08     | 7.261E+08     |
| CerG3      | 12              | 1.311E+08 | 2.260E+08 | 1.083E+08 | 4.179E+08 | 4.093E+08 | 2.211E+08 | 2.307E+09     | 9.030E+08     | 5.085E+08     |
| So         | 4               | 1.173E+08 | 7.907E+07 | 1.406E+08 | 1.160E+09 | 1.361E+09 | 5.528E+08 | 8.964E+08     | 2.446E+09     | 3.038E+09     |
| LPG        | 18              | 1.297E+08 | 1.036E+08 | 9.265E+07 | 2.056E+08 | 1.915E+08 | 1.332E+08 | 3.922E+08     | 1.005E+09     | 8.631E+08     |
| OAHA       | 6               | 7.466E+07 | 8.320E+07 | 9.420E+07 | 1.580E+08 | 1.604E+08 | 7.390E+07 | 1.873E+08     | 1.786E+08     | 2.051E+08     |
| CL         | 39              | 1.620E+07 | 2.487E+07 | 1.779E+08 | 2.154E+08 | 5.182E+08 | 4.059E+08 | 5.853E+07     | 4.724E+08     | 5.468E+08     |
| CerG3GNAC1 | 7               | 9.342E+07 | 7.002E+07 | 5.162E+07 | 3.020E+08 | 1.260E+08 | 2.810E+08 | 2.821E+08     | 2.386E+08     | 1.183E+08     |
| LPMe       | 2               | 4.647E+07 | 4.507E+07 | 7.956E+07 | 5.662E+07 | 6.041E+07 | 3.141E+07 | 5.700E+07     | 3.128E+07     | 4.609E+07     |
| LPI        | 9               | 9.754E+07 | 4.353E+07 | 2.000E+07 | 2.185E+08 | 2.129E+08 | 1.562E+08 | 1.962E+08     | 4.066E+08     | 2.951E+08     |
| LdMePE     | 3               | 5.019E+07 | 3.698E+07 | 4.370E+07 | 3.647E+07 | 6.089E+07 | 4.253E+07 | 6.145E+07     | 8.241E+07     | 8.213E+07     |
| PEt        | 7               | 2.302E+06 | 2.858E+06 | 1.007E+08 | 3.549E+08 | 6.182E+08 | 2.797E+07 | 4.378E+07     | 9.810E+07     | 1.019E+08     |
| PMe        | 11              | 2.413E+07 | 3.121E+06 | 5.728E+06 | 2.009E+07 | 2.675E+07 | 1.321E+08 | 1.475E+08     | 3.749E+08     | 1.134E+08     |
| LPS        | 2               | 5.793E+04 | 9.135E+06 | 5.735E+05 | 1.309E+05 | 2.530E+07 | 8.220E+06 | 1.517E+05     | 6.269E+06     | 2.254E+06     |
| CerG2      | 4               | 6.007E+04 | 4.144E+06 | 2.233E+06 | 7.926E+07 | 9.415E+07 | 1.006E+08 | 1.194E+08     | 1.725E+08     | 1.147E+08     |
| CerG3GNAC2 | 1               | 1.783E+06 | 1.399E+06 | 1.106E+06 | 2.172E+07 | 4.045E+07 | 3.469E+07 | 3.105E+07     | 4.581E+07     | 2.411E+07     |
| cPA        | 3               | 2.658E+05 | 0.000E+00 | 1.181E+05 | 3.697E+06 | 2.237E+06 | 4.175E+06 | 2.444E+06     | 1.520E+07     | 1.698E+06     |
| PIP        | 1               | 0.000E+00 | 0.000E+00 | 2.437E+05 | 2.590E+05 | 1.403E+06 | 5.917E+05 | 1.961E+05     | 1.235E+06     | 4.000E+05     |
| LPET       | 3               | 0.000E+00 | 0.000E+00 | 1.325E+05 | 1.036E+07 | 1.943E+07 | 1.842E+05 | 1.705E+05     | 7.506E+06     | 1.520E+06     |

Supplementary Table 7: Merge lipidomic results of chain types from Supplementary Table 5

| FA Chain Type | Wt.1      | Wt.2      | Wt.3      | Pten.KO.1 | Pten.KO.2 | Pten.KO.3 | Pten.Pml.KO.1 | Pten.Pml.KO.2 | Pten.Pml.KO.3 |
|---------------|-----------|-----------|-----------|-----------|-----------|-----------|---------------|---------------|---------------|
| 18:1          | 6.988E+11 | 6.869E+11 | 6.292E+11 | 6.515E+11 | 7.970E+11 | 5.175E+11 | 9.525E+11     | 9.358E+11     | 1.090E+12     |
| 16:0          | 4.767E+11 | 4.098E+11 | 4.552E+11 | 4.450E+11 | 4.941E+11 | 3.517E+11 | 5.663E+11     | 5.226E+11     | 6.295E+11     |
| 18:2          | 2.903E+11 | 2.340E+11 | 1.761E+11 | 1.482E+11 | 2.542E+11 | 1.125E+11 | 3.974E+11     | 2.368E+11     | 3.234E+11     |
| 20:4          | 2.458E+11 | 1.759E+11 | 2.500E+11 | 1.801E+11 | 1.388E+11 | 1.600E+11 | 1.565E+11     | 1.753E+11     | 1.653E+11     |
| 18:0          | 2.064E+11 | 1.619E+11 | 1.738E+11 | 1.835E+11 | 1.955E+11 | 1.758E+11 | 2.068E+11     | 2.232E+11     | 2.315E+11     |
| 16:1          | 1.621E+11 | 1.308E+11 | 1.331E+11 | 1.432E+11 | 1.828E+11 | 1.086E+11 | 2.479E+11     | 2.006E+11     | 2.705E+11     |
| 22:6          | 1.198E+11 | 9.468E+10 | 1.181E+11 | 1.332E+11 | 1.483E+11 | 1.251E+11 | 1.684E+11     | 1.893E+11     | 1.938E+11     |
| d18:1         | 1.125E+11 | 9.367E+10 | 1.108E+11 | 1.532E+11 | 1.342E+11 | 1.175E+11 | 1.497E+11     | 2.002E+11     | 1.860E+11     |
| 16:0p         | 7.704E+10 | 6.066E+10 | 7.888E+10 | 8.201E+10 | 7.932E+10 | 6.171E+10 | 6.914E+10     | 8.622E+10     | 9.421E+10     |
| 20:3          | 6.187E+10 | 6.088E+10 | 7.278E+10 | 7.870E+10 | 9.302E+10 | 5.377E+10 | 4.863E+10     | 5.999E+10     | 7.453E+10     |
| 24:1          | 4.642E+10 | 3.877E+10 | 4.928E+10 | 6.553E+10 | 5.652E+10 | 4.738E+10 | 7.189E+10     | 8.224E+10     | 7.401E+10     |
| 15:0          | 4.105E+10 | 3.851E+10 | 4.212E+10 | 2.648E+10 | 2.635E+10 | 2.197E+10 | 3.151E+10     | 3.404E+10     | 4.959E+10     |
| d24:0         | 3.599E+10 | 3.014E+10 | 3.910E+10 | 7.744E+10 | 5.890E+10 | 3.790E+10 | 5.430E+10     | 1.724E+11     | 1.456E+11     |
| 20:1          | 3.145E+10 | 2.913E+10 | 2.908E+10 | 3.441E+10 | 3.877E+10 | 2.600E+10 | 3.787E+10     | 3.973E+10     | 5.066E+10     |
| 18:1p         | 2.837E+10 | 2.856E+10 | 2.731E+10 | 2.978E+10 | 3.476E+10 | 2.512E+10 | 3.858E+10     | 3.706E+10     | 3.619E+10     |
| 18:0p         | 3.105E+10 | 2.343E+10 | 2.373E+10 | 3.834E+10 | 2.549E+10 | 2.921E+10 | 2.485E+10     | 3.469E+10     | 3.189E+10     |
| d16:0         | 2.254E+10 | 2.204E+10 | 1.733E+10 | 4.328E+10 | 3.990E+10 | 2.229E+10 | 4.212E+10     | 6.293E+10     | 7.072E+10     |
| 20:5          | 1.866E+10 | 1.977E+10 | 2.080E+10 | 8.957E+09 | 8.759E+09 | 6.858E+09 | 1.054E+10     | 1.096E+10     | 1.882E+10     |
| d22:0         | 1.824E+10 | 1.610E+10 | 1.880E+10 | 2.608E+10 | 2.601E+10 | 2.688E+10 | 2.129E+10     | 3.832E+10     | 5.412E+10     |
| 22:5          | 1.756E+10 | 1.578E+10 | 1.810E+10 | 1.507E+10 | 1.684E+10 | 1.406E+10 | 1.544E+10     | 1.946E+10     | 2.005E+10     |
| 17:0          | 1.383E+10 | 1.377E+10 | 1.324E+10 | 7.700E+09 | 9.992E+09 | 6.120E+09 | 1.053E+10     | 1.139E+10     | 1.371E+10     |
| 16:0e         | 1.413E+10 | 1.316E+10 | 1.316E+10 | 5.213E+10 | 3.944E+10 | 4.008E+10 | 4.348E+10     | 8.008E+10     | 1.029E+11     |
| 22:4          | 1.402E+10 | 9.114E+09 | 1.261E+10 | 1.653E+10 | 1.329E+10 | 1.224E+10 | 1.168E+10     | 1.615E+10     | 1.704E+10     |
| 15:1          | 1.166E+10 | 1.109E+10 | 1.208E+10 | 1.464E+10 | 1.824E+10 | 1.185E+10 | 2.056E+10     | 1.800E+10     | 1.843E+10     |
| 17:1          | 1.117E+10 | 1.177E+10 | 1.143E+10 | 9.933E+09 | 1.004E+10 | 7.715E+09 | 1.167E+10     | 1.243E+10     | 1.676E+10     |
| 20:0          | 1.215E+10 | 1.041E+10 | 1.056E+10 | 7.030E+09 | 8.335E+09 | 5.373E+09 | 5.478E+09     | 1.198E+10     | 1.577E+10     |
| 24:2          | 1.111E+10 | 9.131E+09 | 1.211E+10 | 1.483E+10 | 1.373E+10 | 1.151E+10 | 1.205E+10     | 1.781E+10     | 1.549E+10     |
| 19:1          | 9.324E+09 | 1.111E+10 | 1.132E+10 | 1.224E+10 | 9.675E+09 | 7.449E+09 | 6.728E+09     | 1.517E+10     | 1.380E+10     |
| 14:0          | 1.076E+10 | 8.135E+09 | 1.110E+10 | 1.272E+10 | 1.051E+10 | 6.885E+09 | 1.657E+10     | 1.831E+10     | 2.405E+10     |
| d17:1         | 8.381E+09 | 7.966E+09 | 8.237E+09 | 1.248E+10 | 1.043E+10 | 7.556E+09 | 1.033E+10     | 1.587E+10     | 1.590E+10     |
| 25:1          | 7.597E+09 | 7.517E+09 | 8.015E+09 | 2.114E+10 | 2.115E+10 | 1.419E+10 | 1.835E+10     | 3.750E+10     | 4.718E+10     |
| 19:0          | 8.310E+09 | 9.098E+09 | 4.790E+09 | 4.040E+09 | 6.083E+09 | 3.470E+09 | 9.989E+09     | 1.000E+10     | 8.144E+09     |
| 32:0          | 8.257E+09 | 9.044E+09 | 3.767E+09 | 1.057E+09 | 6.560E+09 | 1.301E+09 | 1.259E+10     | 5.723E+09     | 8.884E+09     |
| 10:0          | 5.168E+09 | 6.786E+09 | 7.896E+09 | 1.168E+10 | 1.301E+10 | 8.004E+09 | 1.123E+10     | 2.047E+10     | 2.409E+10     |
| 13:0          | 5.807E+09 | 6.092E+09 | 6.288E+09 | 9.311E+09 | 9.704E+09 | 6.142E+09 | 1.092E+10     | 1.105E+10     | 1.420E+10     |
| 20:2          | 5.098E+09 | 3.973E+09 | 6.012E+09 | 4.521E+09 | 4.024E+09 | 3.717E+09 | 3.872E+09     | 4.661E+09     | 3.948E+09     |
| 18:3          | 5.511E+09 | 7.274E+09 | 2.078E+09 | 1.725E+09 | 2.980E+09 | 1.205E+09 | 8.222E+09     | 2.478E+09     | 3.943E+09     |
| 21:0          | 4.499E+09 | 4.156E+09 | 3.811E+09 | 3.720E+09 | 3.958E+09 | 2.233E+09 | 2.664E+09     | 4.671E+09     | 5.011E+09     |
| 22:1          | 4.287E+09 | 3.438E+09 | 4.340E+09 | 8.492E+09 | 7.800E+09 | 6.902E+09 | 7.490E+09     | 1.286E+10     | 1.097E+10     |
| 22:0          | 3.447E+09 | 3.702E+09 | 3.239E+09 | 1.369E+10 | 6.769E+09 | 4.969E+09 | 5.348E+09     | 1.002E+10     | 8.896E+09     |
| 28:1          | 2.210E+09 | 1.986E+09 | 3.334E+09 | 1.721E+10 | 8.395E+09 | 4.008E+09 | 3.036E+09     | 1.520E+10     | 9.618E+09     |
| 24:0          | 2.510E+09 | 2.106E+09 | 2.337E+09 | 1.124E+10 | 5.000E+09 | 5.007E+09 | 5.452E+09     | 7.473E+09     | 5.517E+09     |
| 23:1          | 2.139E+09 | 2.343E+09 | 2.221E+09 | 3.084E+09 | 2.340E+09 | 2.107E+09 | 4.685E+09     | 3.172E+09     | 4.590E+09     |
| 20:1p         | 1.042E+09 | 2.118E+09 | 3.076E+09 | 5.364E+09 | 5.405E+09 | 3.498E+09 | 2.846E+09     | 5.681E+09     | 6.070E+09     |
| 18:2p         | 2.169E+09 | 2.078E+09 | 1.408E+09 | 2.098E+09 | 2.214E+09 | 1.717E+09 | 2.483E+09     | 2.768E+09     | 2.543E+09     |
| 20:0p         | 1.729E+09 | 1.601E+09 | 2.117E+09 | 2.920E+09 | 2.506E+09 | 3.467E+09 | 2.640E+09     | 3.316E+09     | 2.703E+09     |
| 4:0           | 3.195E+09 | 9.489E+08 | 5.855E+08 | 2.972E+08 | 6.282E+08 | 1.435E+08 | 5.058E+09     | 3.851E+08     | 8.800E+08     |
| 18:0e         | 1.658E+09 | 1.714E+09 | 1.081E+09 | 1.028E+10 | 5.600E+09 | 7.710E+09 | 5.410E+09     | 1.113E+10     | 1.024E+10     |
| 16:1p         | 2.001E+09 | 1.190E+09 | 1.223E+09 | 2.362E+09 | 2.800E+09 | 1.865E+09 | 4.098E+09     | 3.478E+09     | 3.871E+09     |
| 30:1          | 2.510E+09 | 1.182E+09 | 3.960E+08 | 7.832E+07 | 1.129E+09 | 3.037E+08 | 4.862E+09     | 1.014E+09     | 2.070E+09     |
| 16:2          | 1.187E+09 | 7.918E+08 | 9.301E+08 | 1.174E+09 | 1.024E+09 | 8.815E+08 | 1.288E+09     | 1.192E+09     | 1.759E+09     |
| d18:0         | 1.053E+09 | 9.542E+08 | 8.664E+08 | 1.028E+09 | 9.726E+08 | 5.868E+08 | 6.968E+08     | 1.032E+09     | 8.023E+08     |
| d22:1         | 3.823E+08 | 9.842E+08 | 1.400E+09 | 8.637E+09 | 2.553E+09 | 1.700E+09 | 1.080E+09     | 5.381E+09     | 3.810E+09     |
| d20:0         | 6.080E+08 | 1.760E+09 | 3.874E+08 | 1.477E+08 | 2.950E+08 | 1.552E+08 | 4.989E+08     | 2.581E+08     | 2.840E+08     |
| 26:1          | 8.445E+08 | 6.581E+08 | 8.795E+08 | 2.235E+09 | 1.939E+09 | 1.627E+09 | 2.154E+09     | 3.111E+09     | 2.786E+09     |
| 16:0+O        | 7.222E+08 | 9.555E+08 | 6.723E+08 | 4.988E+08 | 5.026E+08 | 4.067E+08 | 6.459E+08     | 1.049E+09     | 1.098E+09     |
| 25:0          | 6.815E+08 | 6.716E+08 | 7.655E+08 | 9.402E+09 | 4.537E+09 | 4.191E+09 | 2.662E+09     | 1.035E+10     | 1.154E+10     |
| 8:0e          | 7.235E+08 | 5.052E+08 | 8.144E+08 | 1.814E+09 | 1.707E+09 | 1.042E+09 | 1.125E+09     | 2.399E+09     | 2.288E+09     |
| 24:4          | 7.710E+08 | 4.742E+08 | 7.005E+08 | 1.301E+09 | 6.197E+08 | 8.471E+08 | 6.359E+08     | 9.883E+08     | 8.261E+08     |
| 26:4          | 5.052E+08 | 7.021E+08 | 6.895E+08 | 5.612E+08 | 2.015E+09 | 6.016E+08 | 4.907E+08     | 6.240E+08     | 4.923E+08     |
| 24:7          | 7.004E+08 | 4.237E+08 | 7.460E+08 | 9.251E+08 | 2.837E+08 | 4.869E+08 | 1.078E+09     | 6.790E+08     | 4.996E+08     |
| 26:2          | 6.972E+08 | 2.896E+08 | 6.274E+08 | 8.919E+07 | 4.162E+07 | 1.352E+08 | 2.770E+07     | 6.592E+07     | 6.349E+07     |

|        |           |           |           |           |           |           |           |           |           |
|--------|-----------|-----------|-----------|-----------|-----------|-----------|-----------|-----------|-----------|
| 8:0    | 3.759E+08 | 5.095E+08 | 5.812E+08 | 1.225E+09 | 1.034E+09 | 4.739E+08 | 7.166E+08 | 1.396E+09 | 1.192E+09 |
| 26:0   | 4.574E+08 | 4.475E+08 | 5.603E+08 | 1.279E+09 | 6.634E+08 | 4.786E+08 | 5.755E+08 | 5.758E+08 | 4.955E+08 |
| 24:6   | 4.616E+08 | 4.120E+08 | 5.891E+08 | 6.797E+08 | 3.657E+08 | 6.104E+08 | 4.337E+08 | 5.758E+08 | 6.262E+08 |
| 6:0    | 8.973E+08 | 3.940E+08 | 1.648E+08 | 1.600E+08 | 1.941E+08 | 8.197E+07 | 1.510E+09 | 9.517E+07 | 2.242E+08 |
| 22:2   | 4.391E+08 | 3.370E+08 | 5.604E+08 | 1.203E+08 | 1.128E+08 | 2.184E+08 | 1.971E+08 | 1.315E+08 | 2.097E+08 |
| 8:0p   | 3.435E+08 | 2.606E+08 | 4.218E+08 | 7.001E+08 | 9.673E+08 | 3.515E+08 | 3.916E+08 | 1.008E+09 | 1.210E+09 |
| 20:0e  | 3.931E+08 | 1.187E+08 | 4.576E+08 | 1.191E+08 | 6.376E+07 | 3.923E+07 | 3.695E+07 | 9.574E+07 | 1.411E+08 |
| 29:0   | 2.645E+08 | 3.712E+08 | 1.723E+08 | 2.057E+08 | 2.860E+08 | 1.684E+08 | 3.041E+08 | 1.976E+08 | 9.132E+07 |
| 23:0   | 3.431E+08 | 2.436E+08 | 1.284E+08 | 1.639E+09 | 8.549E+08 | 3.688E+08 | 3.212E+08 | 1.171E+09 | 2.133E+09 |
| 35:6   | 2.524E+08 | 2.951E+08 | 1.435E+08 | 3.394E+08 | 2.354E+08 | 5.803E+07 | 1.957E+08 | 1.504E+08 | 1.261E+08 |
| 22:3   | 2.846E+08 | 1.889E+08 | 2.143E+08 | 3.623E+08 | 3.898E+08 | 2.514E+08 | 5.510E+08 | 8.508E+08 | 5.459E+08 |
| 26:3   | 3.986E+07 | 3.203E+08 | 3.236E+08 | 2.269E+08 | 3.287E+08 | 1.783E+09 | 1.648E+08 | 6.349E+08 | 6.921E+07 |
| 33:6   | 1.149E+08 | 3.167E+08 | 1.881E+08 | 1.237E+08 | 3.162E+08 | 3.362E+08 | 3.911E+08 | 4.416E+08 | 8.695E+08 |
| 12:0   | 1.712E+08 | 2.980E+08 | 8.067E+07 | 1.909E+08 | 5.358E+08 | 1.293E+08 | 2.682E+08 | 1.567E+08 | 1.853E+08 |
| 32:6   | 1.705E+08 | 2.809E+08 | 9.192E+07 | 1.253E+07 | 1.536E+08 | 5.332E+07 | 3.514E+08 | 2.333E+07 | 7.855E+07 |
| 36:4   | 4.320E+08 | 7.569E+07 | 2.768E+07 | 1.398E+08 | 1.228E+08 | 1.163E+08 | 4.090E+08 | 1.233E+08 | 1.949E+08 |
| 18:04  | 1.565E+08 | 2.587E+08 | 8.184E+07 | 2.333E+08 | 2.456E+08 | 5.741E+08 | 1.401E+09 | 4.646E+08 | 9.605E+08 |
| 24:3   | 2.647E+08 | 9.358E+07 | 1.222E+08 | 2.063E+08 | 2.279E+08 | 3.703E+08 | 1.331E+08 | 6.746E+07 | 1.639E+08 |
| 28:4   | 1.384E+08 | 1.136E+08 | 1.746E+08 | 2.534E+08 | 2.077E+08 | 1.488E+08 | 1.525E+08 | 2.714E+08 | 2.134E+08 |
| d25:0  | 8.728E+07 | 1.063E+08 | 2.242E+08 | 4.634E+08 | 3.688E+07 | 3.442E+08 | 2.205E+08 | 2.717E+08 | 5.284E+08 |
| 35:5   | 2.079E+08 | 3.899E+07 | 9.356E+07 | 1.289E+07 | 2.167E+06 | 5.371E+04 | 2.611E+07 | 2.458E+07 | 7.461E+07 |
| 23:3   | 9.549E+07 | 9.877E+07 | 1.348E+08 | 1.750E+08 | 1.444E+08 | 1.011E+08 | 2.875E+08 | 3.930E+08 | 4.587E+08 |
| 25:4   | 1.455E+08 | 6.553E+07 | 1.031E+08 | 3.284E+08 | 2.817E+08 | 2.156E+08 | 2.400E+08 | 4.649E+08 | 5.402E+08 |
| 24:5   | 1.458E+07 | 1.228E+08 | 1.616E+08 | 7.565E+07 | 6.221E+07 | 9.897E+07 | 8.294E+07 | 6.589E+07 | 1.285E+08 |
| 14:0p  | 7.769E+07 | 1.115E+08 | 9.777E+07 | 5.412E+07 | 8.118E+07 | 6.379E+07 | 8.495E+07 | 9.986E+07 | 1.371E+08 |
| 21:1   | 1.052E+08 | 7.532E+07 | 1.047E+08 | 9.784E+06 | 6.889E+07 | 1.823E+07 | 7.874E+07 | 8.633E+06 | 1.124E+08 |
| 21:4   | 9.045E+07 | 7.719E+07 | 1.105E+08 | 2.639E+07 | 4.613E+07 | 4.093E+07 | 8.941E+07 | 7.540E+07 | 1.510E+08 |
| 37:5   | 1.511E+08 | 6.885E+07 | 4.292E+07 | 2.037E+08 | 1.267E+08 | 1.570E+08 | 1.738E+08 | 1.037E+08 | 1.392E+08 |
| 26:5   | 1.079E+08 | 7.693E+07 | 4.800E+07 | 1.199E+08 | 9.627E+07 | 1.275E+08 | 8.078E+07 | 3.916E+07 | 1.611E+07 |
| 33:0   | 5.540E+07 | 6.742E+07 | 1.005E+08 | 7.314E+07 | 4.420E+07 | 2.589E+07 | 2.372E+07 | 1.815E+07 | 3.384E+07 |
| 25:3   | 2.328E+07 | 1.197E+08 | 3.921E+07 | 5.800E+07 | 1.144E+08 | 8.261E+07 | 1.624E+08 | 1.571E+08 | 1.839E+08 |
| d18:2  | 2.978E+07 | 1.427E+08 | 2.783E+06 | 2.259E+07 | 4.583E+06 | 2.049E+07 | 4.101E+06 | 1.498E+07 | 8.099E+06 |
| 28:6   | 5.570E+06 | 1.578E+08 | 4.183E+06 | 8.839E+06 | 5.408E+06 | 8.374E+06 | 8.181E+07 | 7.756E+06 | 2.545E+07 |
| d16:1  | 5.637E+06 | 6.888E+07 | 8.324E+07 | 3.173E+07 | 6.133E+08 | 2.695E+08 | 7.063E+08 | 1.210E+09 | 8.496E+08 |
| 37:6   | 4.785E+07 | 6.147E+07 | 1.974E+07 | 7.594E+06 | 3.759E+07 | 1.636E+07 | 4.451E+07 | 8.213E+07 | 1.837E+08 |
| 29:2   | 0.000E+00 | 1.148E+08 | 1.162E+06 | 1.968E+06 | 2.737E+08 | 3.035E+06 | 1.811E+04 | 7.962E+05 | 0.000E+00 |
| d14:1  | 4.158E+07 | 4.835E+07 | 2.222E+06 | 5.594E+07 | 7.382E+07 | 2.089E+07 | 4.786E+07 | 4.147E+07 | 3.295E+06 |
| 25:5   | 1.934E+07 | 6.126E+07 | 7.755E+06 | 8.458E+06 | 5.198E+07 | 0.000E+00 | 0.000E+00 | 8.264E+06 | 0.000E+00 |
| 29:3   | 8.117E+06 | 7.040E+07 | 2.937E+06 | 0.000E+00 | 1.187E+08 | 0.000E+00 | 1.623E+07 | 0.000E+00 | 2.408E+06 |
| 12:0e  | 8.520E+06 | 3.309E+07 | 3.542E+07 | 3.673E+08 | 9.555E+07 | 3.197E+07 | 3.225E+08 | 5.818E+08 | 3.676E+08 |
| 30:6   | 1.590E+07 | 4.904E+07 | 1.174E+07 | 2.544E+07 | 4.100E+07 | 2.001E+07 | 3.525E+07 | 1.706E+07 | 1.067E+07 |
| d17:0  | 1.166E+07 | 3.218E+06 | 3.211E+07 | 4.687E+07 | 5.266E+07 | 3.219E+07 | 2.625E+07 | 2.736E+07 | 5.757E+07 |
| 32:1   | 4.834E+06 | 2.566E+07 | 1.395E+07 | 8.792E+07 | 1.080E+08 | 2.724E+07 | 2.762E+07 | 1.208E+08 | 6.204E+07 |
| 28:3   | 9.699E+06 | 1.651E+06 | 3.185E+07 | 8.336E+07 | 9.230E+06 | 1.308E+07 | 2.375E+07 | 7.814E+07 | 5.427E+07 |
| 21:3   | 1.121E+07 | 2.258E+06 | 2.694E+07 | 2.322E+07 | 2.483E+07 | 6.477E+06 | 3.728E+06 | 2.448E+07 | 2.312E+07 |
| 10:0p  | 3.339E+07 | 6.591E+06 | 0.000E+00 | 0.000E+00 | 0.000E+00 | 3.109E+06 | 3.660E+07 | 6.847E+06 | 4.078E+06 |
| 38:6   | 9.625E+06 | 1.526E+07 | 7.065E+06 | 1.737E+07 | 3.090E+07 | 3.308E+04 | 3.895E+07 | 2.229E+07 | 2.051E+07 |
| 30:2   | 9.342E+06 | 2.076E+07 | 8.191E+05 | 6.732E+04 | 5.735E+07 | 2.759E+07 | 1.418E+07 | 3.814E+07 | 1.717E+07 |
| 34:6   | 1.370E+06 | 1.842E+07 | 7.457E+06 | 4.734E+07 | 5.115E+07 | 1.695E+07 | 5.418E+07 | 6.346E+07 | 2.284E+07 |
| 12:0p  | 8.771E+06 | 1.437E+07 | 2.897E+06 | 0.000E+00 | 1.524E+06 | 6.486E+06 | 3.097E+06 | 1.156E+04 | 1.804E+07 |
| 23:4   | 1.218E+07 | 5.556E+06 | 4.473E+06 | 3.543E+07 | 7.342E+06 | 4.649E+07 | 3.487E+06 | 2.075E+07 | 3.689E+06 |
| 32:2   | 3.917E+06 | 1.011E+07 | 7.366E+06 | 1.845E+07 | 1.900E+07 | 5.513E+06 | 5.014E+07 | 1.385E+07 | 1.615E+07 |
| 28:2   | 5.144E+06 | 4.257E+06 | 6.493E+06 | 3.303E+07 | 2.191E+07 | 2.888E+06 | 2.682E+07 | 6.341E+06 | 2.398E+07 |
| 29:4   | 0.000E+00 | 1.482E+07 | 0.000E+00 | 0.000E+00 | 4.117E+07 | 0.000E+00 | 0.000E+00 | 0.000E+00 | 0.000E+00 |
| 29:1   | 3.603E+04 | 3.795E+06 | 1.030E+07 | 2.113E+06 | 1.725E+07 | 6.924E+06 | 1.232E+07 | 5.051E+06 | 5.691E+07 |
| 26:6   | 2.227E+06 | 1.040E+04 | 5.719E+06 | 1.613E+07 | 2.179E+06 | 2.999E+06 | 5.466E+06 | 9.132E+07 | 3.715E+07 |
| 34:1   | 0.000E+00 | 3.110E+06 | 4.296E+06 | 5.386E+07 | 3.814E+07 | 3.780E+07 | 3.079E+06 | 4.962E+07 | 1.344E+07 |
| 27:1   | 6.009E+06 | 1.070E+06 | 4.672E+03 | 4.437E+06 | 3.961E+06 | 0.000E+00 | 1.097E+07 | 3.324E+07 | 1.680E+07 |
| 34:5   | 0.000E+00 | 6.890E+06 | 0.000E+00 | 0.000E+00 | 1.298E+07 | 0.000E+00 | 0.000E+00 | 0.000E+00 | 0.000E+00 |
| 27:6   | 0.000E+00 | 0.000E+00 | 5.197E+06 | 0.000E+00 | 1.966E+06 | 1.642E+06 | 2.500E+04 | 3.466E+04 | 1.749E+04 |
| 14:0e  | 9.770E+05 | 1.644E+03 | 3.028E+05 | 2.079E+06 | 8.440E+05 | 1.685E+06 | 3.312E+06 | 5.119E+07 | 4.122E+07 |
| 28:0   | 1.300E+04 | 1.211E+06 | 0.000E+00 | 1.354E+07 | 3.348E+06 | 2.395E+06 | 6.618E+05 | 4.718E+07 | 4.170E+07 |
| 27:3   | 1.922E+05 | 2.034E+05 | 4.692E+05 | 2.683E+06 | 1.078E+06 | 0.000E+00 | 4.018E+06 | 1.331E+07 | 9.221E+06 |
| 36:3   | 0.000E+00 | 0.000E+00 | 2.437E+05 | 2.590E+05 | 1.403E+06 | 5.917E+05 | 1.961E+05 | 1.235E+06 | 4.000E+05 |
| 20:0+O | 0.000E+00 | 0.000E+00 | 0.000E+00 | 1.788E+05 | 0.000E+00 | 0.000E+00 | 0.000E+00 | 6.079E+06 | 2.896E+07 |

Supplementary Table 10: Lipidomics of the prostate tumors from chow- or HFD-fed prostate-specific Pten knockout and prostate-specific Pten and Pml double knockout mice

| Lipid Ion                  | Class | FA1    | FA2      | FA3    | FA4    | Pten.KO.chow.1 | Pten.KO.chow.2 | Pten.KO.chow.3 | Pten.KO.HFD.1 | Pten.KO.HFD.2 | Pten.KO.HFD.3 | Pten.Pml.KO.chow.1 | Pten.Pml.KO.chow.2 | Pten.Pml.KO.chow.3 | Pten.Pml.KO.HFD.1 | Pten.Pml.KO.HFD.2 | Pten.Pml.KO.HFD.3 |
|----------------------------|-------|--------|----------|--------|--------|----------------|----------------|----------------|---------------|---------------|---------------|--------------------|--------------------|--------------------|-------------------|-------------------|-------------------|
| CL(18:1/16:0/16:0/18:1)-H  | CL    | (18:1) | (16:0)   | (16:0) | (18:1) | 0.00E+00       | 5.97E+05       | 5.49E+03       | 0.00E+00      | 2.85E+05      | 0.00E+00      | 0.00E+00           | 0.00E+00           | 0.00E+00           | 0.00E+00          | 0.00E+00          | 1.61E+05          |
| CL(18:2/16:1/16:1/18:1)-H  | CL    | (18:2) | (16:1)   | (16:1) | (18:1) | 0.00E+00       | 8.71E+04       | 0.00E+00       | 0.00E+00      | 1.28E+05      | 0.00E+00      | 7.85E+04           | 2.90E+05           | 1.74E+05           | 0.00E+00          | 8.89E+05          | 8.89E+05          |
| CL(18:2/16:0/18:1/18:2)-H  | CL    | (18:2) | (16:0)   | (18:1) | (18:2) | 0.00E+00       | 2.73E+05       | 3.49E+05       | 0.00E+00      | 1.76E+05      | 0.00E+00      | 6.78E+03           | 0.00E+00           | 1.64E+05           | 0.00E+00          | 0.00E+00          | 1.20E+07          |
| CL(18:2/18:2/16:1/18:1)-H  | CL    | (18:2) | (18:2)   | (16:1) | (18:1) | 5.49E+05       | 0.00E+00       | 2.77E+05       | 9.58E+05      | 1.05E+06      | 1.49E+06      | 3.16E+03           | 2.43E+05           | 1.22E+05           | 1.47E+06          | 1.26E+07          | 2.05E+07          |
| CL(18:2/16:1/18:2/18:2)-2H | CL    | (18:2) | (16:1)   | (18:2) | (18:2) | 0.00E+00       | 0.00E+00       | 4.07E+05       | 0.00E+00      | 5.01E+03      | 2.62E+06      | 1.69E+05           | 1.27E+05           | 0.00E+00           | 1.22E+06          | 3.81E+06          | 9.70E+06          |
| CL(18:2/16:1/18:2/18:2)-2H | CL    | (18:2) | (16:1)   | (18:2) | (18:2) | 0.00E+00       | 0.00E+00       | 0.00E+00       | 0.00E+00      | 0.00E+00      | 1.21E+03      | 0.00E+00           | 0.00E+00           | 0.00E+00           | 1.20E+03          | 1.12E+06          | 7.67E+05          |
| CL(18:2/18:1/18:2/18:2)-2H | CL    | (18:2) | (18:1)   | (18:2) | (18:2) | 0.00E+00       | 1.59E+05       | 0.00E+00       | 0.00E+00      | 2.13E+05      | 3.20E+05      | 0.00E+00           | 0.00E+00           | 0.00E+00           | 8.74E+04          | 5.40E+05          | 5.40E+05          |
| CL(18:2/18:2/18:2/18:2)-2H | CL    | (18:2) | (18:2)   | (18:2) | (18:2) | 9.34E+05       | 4.85E+03       | 7.44E+05       | 3.02E+06      | 2.65E+06      | 8.95E+06      | 0.00E+00           | 1.36E+06           | 3.66E+06           | 1.33E+07          | 1.95E+07          | 2.92E+07          |
| CL(18:2/18:2/18:2/18:2)-2H | CL    | (18:2) | (18:2)   | (18:2) | (18:2) | 1.20E+05       | 0.00E+00       | 1.09E+05       | 1.95E+04      | 2.38E+05      | 7.78E+05      | 0.00E+00           | 0.00E+00           | 0.00E+00           | 2.31E+05          | 2.80E+06          | 2.06E+07          |
| CL(18:2/18:2/20:4/18:2)-2H | CL    | (18:2) | (18:2)   | (20:4) | (18:2) | 0.00E+00       | 0.00E+00       | 0.00E+00       | 0.00E+00      | 0.00E+00      | 2.01E+05      | 3.18E+03           | 0.00E+00           | 0.00E+00           | 4.53E+05          | 5.22E+05          | 1.08E+06          |
| CL(18:2/18:1/20:4/18:2)-2H | CL    | (18:2) | (18:1)   | (20:4) | (18:2) | 0.00E+00       | 0.00E+00       | 0.00E+00       | 0.00E+00      | 0.00E+00      | 1.81E+05      | 0.00E+00           | 0.00E+00           | 0.00E+00           | 3.09E+03          | 9.81E+05          | 1.24E+06          |
| CL(19:0/16:0/20:4/20:4)-2H | CL    | (19:0) | (16:0)   | (20:4) | (20:4) | 3.91E+06       | 8.05E+06       | 4.81E+06       | 1.73E+06      | 9.37E+06      | 3.65E+07      | 9.63E+06           | 1.05E+07           | 1.74E+06           | 7.41E+06          | 7.40E+07          | 3.78E+07          |
| Cer(18:1/16:0+0)-H         | Cer   | (18:1) | (16:0+0) |        |        | 1.20E+07       | 1.10E+07       | 1.80E+07       | 3.61E+07      | 2.28E+07      | 3.34E+07      | 4.21E+06           | 1.04E+07           | 1.20E+07           | 2.12E+07          | 2.73E+07          | 1.45E+07          |
| Cer(17:1/16:0)-H           | Cer   | (17:1) | (16:0)   |        |        | 8.60E+06       | 8.81E+06       | 2.57E+07       | 8.04E+06      | 2.30E+07      | 3.45E+06      | 2.55E+06           | 2.10E+07           | 9.82E+06           | 1.58E+07          | 2.27E+07          | 3.47E+06          |
| Cer(18:0/16:0)-H           | Cer   | (18:0) | (16:0)   |        |        | 3.83E+07       | 2.42E+07       | 6.81E+06       | 8.41E+07      | 6.51E+07      | 0.00E+00      | 8.32E+06           | 2.76E+07           | 5.02E+07           | 3.66E+07          | 3.23E+07          |                   |
| Cer(18:1/16:0)-H           | Cer   | (18:1) | (16:0)   |        |        | 3.77E+06       | 3.85E+06       | 5.69E+03       | 1.29E+07      | 0.00E+00      | 4.56E+06      | 1.81E+06           | 4.87E+06           | 4.52E+06           | 7.17E+06          | 6.73E+06          | 4.36E+06          |
| Cer(18:1/16:0)-H           | Cer   | (18:1) | (16:0)   |        |        | 5.32E+08       | 5.86E+08       | 3.16E+08       | 1.17E+09      | 1.47E+09      | 9.01E+08      | 4.80E+08           | 3.19E+08           | 2.71E+08           | 6.50E+08          | 5.32E+08          | 9.92E+08          |
| Cer(18:1/16:0)-H           | Cer   | (18:1) | (16:0)   |        |        | 2.69E+08       | 1.93E+08       | 3.02E+08       | 4.53E+08      | 4.57E+08      | 5.80E+08      | 2.19E+08           | 3.19E+08           | 2.71E+08           | 6.50E+08          | 5.32E+08          | 9.92E+08          |
| Cer(18:1/16:1)-H           | Cer   | (18:1) | (16:1)   |        |        | 1.47E+04       | 6.00E+05       | 1.61E+06       | 1.26E+07      | 5.74E+03      | 1.93E+06      | 0.00E+00           | 9.52E+05           | 9.66E+06           | 1.17E+07          | 1.88E+06          | 2.50E+06          |
| Cer(18:1/16:1)-H           | Cer   | (18:1) | (16:1)   |        |        | 1.61E+06       | 4.40E+06       | 3.07E+06       | 1.25E+07      | 3.91E+07      | 1.18E+07      | 6.07E+06           | 9.62E+06           | 5.98E+06           | 2.01E+07          | 1.53E+07          | 1.78E+07          |
| Cer(18:1/18:0)-H           | Cer   | (18:1) | (18:0)   |        |        | 5.12E+07       | 3.80E+07       | 6.02E+07       | 2.41E+08      | 3.50E+08      | 1.52E+08      | 5.90E+07           | 2.54E+08           | 2.20E+08           | 2.55E+08          | 1.56E+08          | 1.02E+08          |
| Cer(18:2/18:0)-H           | Cer   | (18:2) | (18:0)   |        |        | 0.00E+00       | 0.00E+00       | 5.71E+05       | 1.06E+07      | 1.04E+07      | 0.00E+00      | 0.00E+00           | 8.03E+06           | 7.70E+06           | 1.44E+06          | 1.36E+06          | 1.54E+06          |
| Cer(18:1/20:0)-H           | Cer   | (18:1) | (20:0)   |        |        | 4.84E+07       | 6.24E+07       | 6.36E+07       | 1.22E+08      | 1.93E+08      | 8.56E+07      | 4.41E+07           | 1.36E+08           | 1.48E+08           | 1.90E+08          | 9.10E+07          | 7.38E+07          |
| Cer(18:2/20:0)-H           | Cer   | (18:2) | (20:0)   |        |        | 1.47E+04       | 0.00E+00       | 2.14E+06       | 1.30E+07      | 5.41E+07      | 4.69E+06      | 9.80E+05           | 2.53E+07           | 6.42E+06           | 5.77E+06          | 3.75E+04          |                   |
| Cer(17:1/22:0)-H           | Cer   | (17:1) | (22:0)   |        |        | 1.50E+07       | 1.36E+07       | 0.00E+00       | 8.81E+06      | 2.27E+07      | 1.05E+07      | 8.07E+06           | 1.78E+07           | 1.82E+07           | 1.63E+07          | 1.21E+07          | 1.03E+07          |
| Cer(17:2/22:0)-H           | Cer   | (17:2) | (22:0)   |        |        | 1.52E+06       | 3.70E+06       | 1.84E+06       | 6.28E+06      | 5.94E+06      | 5.30E+06      | 8.46E+04           | 1.66E+06           | 3.41E+06           | 1.47E+07          | 4.35E+06          | 8.15E+06          |
| Cer(18:1/22:0)-H           | Cer   | (18:1) | (22:0)   |        |        | 4.20E+08       | 5.35E+08       | 0.00E+00       | 0.00E+00      | 7.30E+08      | 5.73E+08      | 1.79E+08           | 9.62E+08           | 9.92E+08           | 9.62E+08          | 5.77E+08          |                   |
| Cer(18:2/22:1)-H           | Cer   | (18:2) | (22:1)   |        |        | 4.76E+07       | 0.00E+00       | 4.17E+07       | 4.91E+07      | 2.83E+08      | 8.91E+07      | 1.05E+07           | 1.14E+08           | 0.00E+00           | 0.00E+00          | 1.13E+08          | 2.06E+08          |
| Cer(17:1/24:0)-H           | Cer   | (17:1) | (24:0)   |        |        | 4.14E+06       | 1.35E+06       | 2.87E+06       | 3.37E+06      | 2.04E+06      | 4.44E+06      | 4.42E+05           | 5.93E+05           | 0.00E+00           | 2.81E+06          | 3.47E+06          | 3.93E+06          |
| Cer(17:1/24:1)-H           | Cer   | (17:1) | (24:1)   |        |        | 3.85E+07       | 0.00E+00       | 7.44E+07       | 1.09E+08      | 1.15E+08      | 7.64E+07      | 2.36E+07           | 8.32E+07           | 8.66E+07           | 8.14E+07          | 8.97E+07          |                   |
| Cer(18:1/24:0)-H           | Cer   | (18:1) | (24:0)   |        |        | 9.72E+06       | 8.17E+06       | 4.10E+06       | 2.91E+07      | 0.00E+00      | 3.59E+07      | 2.84E+06           | 5.83E+06           | 6.57E+06           | 3.79E+07          | 2.40E+07          | 4.44E+07          |
| Cer(18:1/24:0)-H           | Cer   | (18:1) | (24:0)   |        |        | 8.45E+08       | 0.00E+00       | 2.56E+08       | 6.77E+08      | 2.94E+08      | 1.69E+09      | 2.84E+08           | 0.00E+00           | 8.46E+08           | 7.76E+08          | 1.89E+09          | 3.66E+09          |
| Cer(18:1/24:1)-H           | Cer   | (18:1) | (24:1)   |        |        | 0.00E+00       | 0.00E+00       | 0.00E+00       | 0.00E+00      | 0.00E+00      | 1.73E+07      | 0.00E+00           | 0.00E+00           | 0.00E+00           | 2.83E+06          | 1.64E+07          | 2.80E+07          |
| Cer(18:1/24:1)-H           | Cer   | (18:1) | (24:1)   |        |        | 1.19E+07       | 7.29E+06       | 7.84E+06       | 1.48E+07      | 1.52E+07      | 4.40E+07      | 6.12E+06           | 1.01E+07           | 1.22E+07           | 4.51E+07          | 4.98E+07          |                   |
| Cer(18:1/24:1)-H           | Cer   | (18:1) | (24:1)   |        |        | 0.00E+00       | 1.52E+09       | 1.27E+09       | 2.42E+09      | 2.52E+09      | 3.97E+09      | 8.52E+08           | 2.39E+09           | 6.05E+08           | 2.88E+09          | 4.08E+09          | 4.63E+09          |
| Cer(18:1/24:2)-H           | Cer   | (18:1) | (24:2)   |        |        | 4.18E+08       | 1.93E+08       | 1.91E+08       | 4.28E+08      | 6.95E+08      | 3.46E+08      | 3.57E+08           | 8.09E+08           | 1.96E+08           | 9.51E+08          | 0.00E+00          | 6.26E+08          |
| Cer(18:1/26:0)-H           | Cer   | (18:1) | (26:0)   |        |        | 6.81E+05       | 7.04E+05       | 2.04E+05       | 1.65E+06      | 0.00E+00      | 2.87E+05      | 0.00E+00           | 2.83E+05           | 4.07E+05           | 6.40E+06          | 2.71E+06          | 1.13E+06          |
| Cer(18:1/26:0)-H           | Cer   | (18:1) | (26:0)   |        |        | 1.94E+08       | 1.77E+08       | 1.09E+08       | 2.05E+08      | 5.50E+07      | 9.41E+07      | 6.17E+07           | 5.30E+07           | 1.09E+08           | 2.31E+08          | 1.34E+08          | 1.52E+08          |
| Cer(18:1/26:1)-H           | Cer   | (18:1) | (26:1)   |        |        | 2.39E+07       | 4.69E+07       | 3.82E+07       | 4.49E+07      | 2.13E+07      | 4.23E+07      | 1.73E+07           | 2.36E+07           | 1.47E+07           | 4.50E+07          | 3.57E+07          | 5.54E+07          |
| CerG1(18:1/16:0+0)-H       | CerG1 | (18:1) | (16:0+0) |        |        | 1.13E+08       | 7.73E+07       | 1.46E+08       | 2.07E+08      | 6.30E+07      | 2.21E+08      | 5.71E+07           | 8.81E+07           | 7.36E+07           | 3.19E+08          | 1.41E+08          | 7.21E+06          |
| CerG1(18:1/16:0)-H         | CerG1 | (18:1) | (16:0)   |        |        | 9.52E+03       | 0.00E+00       | 0.00E+00       | 6.27E+06      | 8.69E+05      | 9.00E+06      | 1.62E+06           | 1.58E+07           | 6.62E+06           | 8.71E+06          | 4.10E+06          | 4.79E+06          |
| CerG1(18:1/16:0)-H         | CerG1 | (18:1) | (16:0)   |        |        | 1.61E+08       | 8.71E+07       | 8.64E+07       | 1.82E+08      | 1.73E+08      | 3.87E+08      | 7.03E+08           | 3.91E+08           | 1.89E+08           | 3.10E+08          | 3.87E+08          | 4.68E+08          |
| CerG1(18:1/16:0)-H         | CerG1 | (18:1) | (16:0)   |        |        | 8.37E+07       | 5.16E+07       | 8.40E+07       | 2.02E+08      | 7.30E+07      | 1.88E+08      | 6.37E+08           | 1.02E+08           | 1.20E+08           | 2.25E+08          | 2.95E+08          |                   |
| CerG1(18:1/16:1)-H         | CerG1 | (18:1) | (16:1)   |        |        | 1.21E+07       | 1.05E+07       | 0.00E+00       | 4.37E+07      | 1.39E+07      | 4.77E+07      | 9.41E+06           | 1.31E+07           | 4.22E+06           | 5.38E+07          | 9.45E+06          | 0.00E+00          |
| CerG1(18:1/22:0)-H         | CerG1 | (18:1) | (22:0)   |        |        | 1.84E+08       | 1.80E+08       | 0.00E+00       | 1.84E+08      | 2.58E+08      | 5.09E+08      | 1.15E+08           | 2.78E+08           | 3.54E+08           | 1.15E+08          | 7.53E+08          |                   |
| CerG1(18:1/24:0)-H         | CerG1 | (18:1) | (24:0)   |        |        | 1.41E+08       | 1.93E+08       | 4.59E+08       | 0.00E+00      | 0.00E+00      | 6.29E+08      | 2.16E+08           | 4.08E+08           | 3.24E+08           | 4.88E+08          | 6.82E+08          | 7.43E+08          |
| CerG2(18:1/16:0)-H         | CerG2 | (18:1) | (16:0)   |        |        | 1.19E+07       | 8.30E+06       | 7.11E+06       | 0.00E+00      | 9.24E+06      | 3.30E+07      | 1.11E+08           | 6.14E+06           | 1.12E+07           | 2.78E+07          | 1.37E+07          | 3.00E+07          |
| CerG2(18:1/16:1)-H         | CerG2 | (18:1) | (16:1)   |        |        | 9.58E+06       | 2.03E+05       | 8.33E+06       | 5.37E+06      | 3.24E+07      | 1.84E+07      | 1.43E+07           | 7.68E+06           | 4.49E+07           | 3.11E+07          | 2.28E+07          |                   |
| CerG2(18:1/22:0)-H         | CerG2 | (18:1) | (22:0)   |        |        | 0.00E+00       | 0.00E+00       | 0.00E+00       | 0.00E+00      | 5.35E+06      | 5.54E+06      | 2.16E+07           | 7.22E+06           | 7.65E+06           | 1.13E+07          | 0.00E+00          | 4.55E+06          |
| CerG2(18:1/24:0)-H         | CerG2 | (18:1) | (24:0)   |        |        | 5.55E+06       | 9.35E+06       | 6.29E+06       | 1.63E+07      | 1.41E+07      | 2.27E+07      | 5.81E+07           | 3.47E+07           | 2.24E+07           | 1.93E+07          | 2.65E+07          | 1.84E+07          |
| CerG2(18:1/24:1)-H         | CerG2 | (18:1) | (24:1)   |        |        | 7.03E+06       | 7.85E+03       | 1.01E+06       | 1.70E+06      | 4.44E+06      | 8.79E+06      | 8.79E+06           | 3.61E+06           | 4.44E+06           | 7.70E+06          | 8.39E+06          | 5.69E+06          |
| CerG2(18:1/24:2)-H         | CerG2 | (18:1) | (24:2)   |        |        | 0.00E+00       | 0.00E+00       | 0.00E+00       | 0.00E+00      | 0.00E+00      | 0.00E+00      | 2.08E+07           | 0.00E+00           | 0.00E+00           | 0.00E+00          | 0.00E+00          | 0.00E+00          |
| CerG3(18:1/16:0+0)-H       | CerG3 | (18:1) | (16:0+0) |        |        | 4.06E+06       | 8.88E+06       | 8.99E+06       | 6.49E+07      | 1.83E+06      | 9.13E+07      | 1.95E+06           | 4.65E+06           | 6.56E+06           | 9.64E+07          | 6.02E+07          | 1.05E+08          |
| CerG3(18:1/16:0+0)-H       | CerG3 | (18:1) | (16:0+0) |        |        | 1.92E+06       | 3.17E+06       | 0.00E+00       | 1.50E+07      | 0.00E+00      | 2.80E+07      | 0.00E+00           | 0.00E+00           | 0.00E+00           | 3.19E+07          | 7.81E+06          | 5.22E+07          |
| CerG3(18:1/16:0)-H         | CerG3 | (18:1) | (16:0)   |        |        | 1.73E+07       | 3.35E+07       | 3.09E+06       | 1.69E+08      | 7.80E+05      | 5.75E+08      | 1.64E+07           | 1.97E+07           | 1.74E+07           | 3.58E+08          | 3.67E+08          | 9.85E+08          |
| CerG3(18:1/16:0)-H         | CerG3 | (18:1) | (16:0)   |        |        | 1.42E+07       | 3.44E+07       | 8.37E+05       | 1.43E+08      | 0.00E+00      | 3.40E+08      | 2.30E+06           | 4.22E+06           | 1.57E+07           | 6.68E+07          | 3.86E+08          | 8.31E+08          |
| CerG3(18:1/20:0)-H         | CerG3 | (18:1) | (20:0)   |        |        | 0.00E+00       | 0              |                |               |               |               |                    |                    |                    |                   |                   |                   |

|                   |    |         |        |          |           |          |           |          |          |          |          |          |          |          |          |
|-------------------|----|---------|--------|----------|-----------|----------|-----------|----------|----------|----------|----------|----------|----------|----------|----------|
| DG(16:0/18:1)+NH4 | DG | (16:0)  | (18:1) | 0.00E+00 | 0.00E+00  | 0.00E+00 | 0.00E+00  | 7.12E+05 | 4.76E+05 | 1.46E+06 | 5.70E+05 | 5.46E+05 | 7.31E+03 | 4.49E+06 | 2.37E+06 |
| DG(16:0/18:1)+NH4 | DG | (16:0)  | (18:1) | 0.00E+00 | 0.00E+00  | 0.00E+00 | 0.00E+00  | 3.63E+06 | 1.04E+06 | 3.55E+06 | 3.40E+06 | 3.66E+06 | 6.52E+05 | 9.00E+06 | 1.01E+07 |
| DG(16:0/18:1)+NH4 | DG | (16:0)  | (18:1) | 0.00E+00 | 0.115E+05 | 0.00E+00 | 0.00E+00  | 1.41E+06 | 8.68E+05 | 4.19E+06 | 1.85E+06 | 2.30E+06 | 3.45E+05 | 1.68E+06 | 1.24E+06 |
| DG(16:0/18:1)+NH4 | DG | (16:0)  | (18:1) | 0.00E+00 | 0.00E+00  | 0.00E+00 | 0.00E+00  | 4.69E+05 | 1.43E+06 | 3.30E+06 | 1.30E+06 | 1.42E+06 | 2.55E+05 | 3.40E+06 | 4.34E+06 |
| DG(16:0/18:1)+NH4 | DG | (16:0)  | (18:1) | 0.00E+00 | 0.00E+00  | 0.00E+00 | 0.00E+00  | 3.85E+05 | 8.19E+05 | 4.31E+06 | 5.09E+05 | 1.16E+06 | 0.00E+00 | 1.61E+07 | 7.11E+06 |
| DG(16:0/18:1)+NH4 | DG | (16:0)  | (18:1) | 0.00E+00 | 0.462E+06 | 0.00E+00 | 0.893E+06 | 3.22E+06 | 1.31E+07 | 4.70E+06 | 2.61E+06 | 1.39E+06 | 1.98E+06 | 1.17E+07 | 2.58E+06 |
| DG(16:0/18:1)+NH4 | DG | (16:0)  | (18:1) | 1.30E+04 | 4.62E+06  | 8.03E+03 | 2.57E+04  | 3.07E+06 | 1.03E+07 | 4.70E+06 | 6.24E+06 | 2.24E+06 | 5.49E+05 | 9.03E+06 | 3.38E+06 |
| DG(16:0/18:1)+NH4 | DG | (16:0)  | (18:1) | 0.00E+00 | 0.00E+00  | 0.00E+00 | 0.00E+00  | 1.52E+06 | 1.24E+04 | 6.39E+06 | 1.12E+06 | 0.00E+00 | 0.00E+00 | 4.18E+06 | 1.66E+06 |
| DG(16:0/18:1)+NH4 | DG | (16:0)  | (18:1) | 4.04E+08 | 3.20E+08  | 1.33E+09 | 9.22E+09  | 1.23E+10 | 1.23E+10 | 5.27E+08 | 1.14E+10 | 2.07E+09 | 1.01E+10 | 1.26E+10 | 9.94E+09 |
| DG(16:0/18:1)+H   | DG | (16:0)  | (18:1) | 1.16E+06 | 1.03E+06  | 1.03E+06 | 1.84E+08  | 1.09E+08 | 1.30E+08 | 1.64E+08 | 7.12E+07 | 1.11E+07 | 1.33E+08 | 1.83E+08 | 1.41E+08 |
| DG(16:0/18:1)+NH4 | DG | (16:0)  | (18:1) | 0.00E+00 | 8.01E+05  | 0.00E+00 | 0.00E+00  | 0.00E+00 | 3.38E+06 | 5.47E+06 | 2.10E+06 | 0.00E+00 | 0.00E+00 | 0.00E+00 | 0.00E+00 |
| DG(16:0/18:1)+NH4 | DG | (16:0)  | (18:1) | 0.00E+00 | 0.00E+00  | 0.00E+00 | 0.00E+00  | 0.00E+00 | 0.00E+00 | 7.30E+05 | 0.00E+00 | 6.76E+04 | 0.00E+00 | 0.00E+00 | 3.24E+06 |
| DG(16:0/18:1)+NH4 | DG | (16:0)  | (18:1) | 0.00E+00 | 9.88E+05  | 1.11E+06 | 4.70E+06  | 0.00E+00 | 3.71E+07 | 8.69E+06 | 9.21E+06 | 1.05E+07 | 0.00E+00 | 0.00E+00 | 8.70E+07 |
| DG(16:0/18:1)+NH4 | DG | (16:0)  | (18:1) | 4.78E+05 | 1.99E+05  | 8.60E+05 | 6.77E+06  | 2.78E+07 | 8.70E+07 | 3.71E+06 | 6.21E+05 | 1.95E+07 | 8.70E+06 | 6.07E+07 | 4.75E+06 |
| DG(16:0/18:1)+NH4 | DG | (16:0)  | (18:1) | 2.59E+05 | 1.86E+05  | 2.92E+05 | 2.50E+06  | 6.21E+07 | 2.84E+05 | 3.37E+05 | 7.15E+05 | 6.05E+05 | 7.97E+05 | 6.12E+06 | 1.63E+06 |
| DG(34:1E)+NH4     | DG | (34:1E) |        | 6.66E+07 | 3.96E+07  | 4.87E+07 | 5.49E+07  | 3.83E+07 | 5.41E+07 | 6.21E+07 | 2.77E+07 | 4.11E+07 | 7.85E+07 | 6.16E+07 | 4.16E+07 |
| DG(34:1E)+H       | DG | (34:1E) |        | 2.66E+08 | 1.46E+08  | 1.44E+08 | 1.63E+08  | 1.74E+08 | 1.37E+08 | 1.62E+08 | 1.72E+08 | 9.68E+07 | 1.35E+08 | 2.29E+08 | 8.52E+07 |
| DG(16:0/18:2)+NH4 | DG | (16:0)  | (18:2) | 0.00E+00 | 0.00E+00  | 0.00E+00 | 0.00E+00  | 9.48E+05 | 2.08E+05 | 2.28E+06 | 0.00E+00 | 2.07E+05 | 0.00E+00 | 3.24E+05 | 3.00E+06 |
| DG(16:0/18:2)+NH4 | DG | (16:0)  | (18:2) | 8.19E+08 | 5.99E+08  | 9.32E+08 | 1.27E+10  | 1.69E+10 | 1.85E+10 | 4.56E+08 | 7.13E+09 | 3.30E+09 | 1.27E+10 | 1.82E+10 | 1.35E+10 |
| DG(16:1/18:1)+NH4 | DG | (16:1)  | (18:1) | 1.04E+05 | 2.63E+05  | 0.00E+00 | 4.38E+07  | 5.58E+06 | 3.89E+07 | 2.39E+06 | 0.00E+00 | 0.00E+00 | 1.89E+07 | 2.34E+07 | 2.15E+07 |
| DG(16:1/18:1)+NH4 | DG | (16:1)  | (18:1) | 8.14E+02 | 1.07E+05  | 3.91E+04 | 1.09E+06  | 2.26E+06 | 2.77E+06 | 5.07E+05 | 0.00E+00 | 0.00E+00 | 9.18E+06 | 3.66E+06 | 1.55E+07 |
| DG(34:2E)+H       | DG | (34:2E) |        | 6.68E+04 | 4.77E+04  | 7.20E+03 | 1.07E+06  | 5.84E+05 | 8.14E+05 | 2.14E+05 | 0.00E+00 | 0.00E+00 | 7.14E+05 | 2.63E+06 | 4.28E+06 |
| DG(34:2E)+H       | DG | (34:2E) |        | 5.66E+08 | 6.37E+08  | 5.47E+08 | 5.20E+08  | 1.92E+08 | 7.70E+08 | 2.27E+06 | 1.47E+08 | 1.34E+08 | 4.45E+08 | 1.03E+09 | 8.56E+08 |
| DG(34:2E)+H       | DG | (34:2E) |        | 2.26E+08 | 6.45E+08  | 5.34E+08 | 1.79E+07  | 8.92E+07 | 3.96E+08 | 7.10E+07 | 5.56E+07 | 1.07E+08 | 2.62E+08 | 1.03E+09 | 8.45E+08 |
| DG(34:2E)+H       | DG | (34:2E) |        | 8.73E+04 | 1.38E+06  | 3.34E+06 | 2.53E+06  | 2.68E+04 | 1.44E+07 | 1.19E+06 | 1.79E+06 | 1.52E+06 | 8.65E+06 | 2.26E+07 | 2.39E+07 |
| DG(34:2E)+H       | DG | (34:2E) |        | 1.86E+08 | 1.15E+08  | 1.48E+08 | 1.45E+09  | 1.87E+09 | 1.74E+09 | 2.55E+08 | 1.06E+09 | 4.81E+08 | 1.53E+09 | 0.00E+00 | 9.20E+08 |
| DG(34:2E)+H       | DG | (34:2E) |        | 0.00E+00 | 8.75E+05  | 1.40E+06 | 2.11E+08  | 7.09E+07 | 1.95E+08 | 7.57E+05 | 2.02E+07 | 3.65E+06 | 2.10E+08 | 1.10E+08 | 3.31E+08 |
| DG(34:2E)+H       | DG | (34:2E) |        | 3.29E+07 | 3.10E+07  | 4.87E+07 | 1.85E+09  | 1.02E+09 | 2.29E+09 | 7.82E+06 | 9.29E+08 | 2.28E+08 | 2.02E+09 | 2.38E+09 | 2.28E+09 |
| DG(34:2E)+H       | DG | (34:2E) |        | 3.34E+07 | 3.48E+07  | 4.87E+07 | 1.24E+09  | 2.29E+09 | 2.29E+09 | 6.07E+06 | 2.40E+09 | 1.24E+09 | 2.29E+09 | 2.29E+09 | 2.29E+09 |
| DG(34:2E)+H       | DG | (34:2E) |        | 3.66E+05 | 3.90E+05  | 3.19E+05 | 7.88E+05  | 0.00E+00 | 3.10E+06 | 1.47E+05 | 8.96E+05 | 1.73E+05 | 0.00E+00 | 0.00E+00 | 1.31E+07 |
| DG(34:2E)+H       | DG | (34:2E) |        | 9.91E+02 | 0.00E+00  | 2.39E+05 | 3.94E+05  | 0.00E+00 | 4.27E+06 | 2.18E+05 | 1.18E+05 | 5.60E+05 | 0.00E+00 | 6.85E+05 | 3.70E+06 |
| DG(16:1/18:2)+NH4 | DG | (16:1)  | (18:2) | 0.00E+00 | 1.58E+07  | 8.05E+05 | 2.83E+09  | 2.09E+09 | 3.02E+09 | 1.87E+06 | 8.73E+08 | 7.76E+08 | 1.66E+09 | 2.37E+09 | 1.70E+09 |
| DG(34:3E)+H       | DG | (34:3E) |        | 2.26E+08 | 6.45E+08  | 5.34E+08 | 2.64E+08  | 8.92E+07 | 3.96E+08 | 1.49E+08 | 5.56E+07 | 3.04E+07 | 2.53E+08 | 1.03E+09 | 8.45E+08 |
| DG(34:3E)+H       | DG | (34:3E) |        | 1.89E+08 | 1.73E+08  | 1.96E+08 | 2.46E+08  | 1.10E+08 | 6.14E+08 | 3.48E+07 | 5.83E+07 | 4.20E+07 | 5.54E+08 | 7.09E+08 | 8.88E+08 |
| DG(34:3E)+H       | DG | (34:3E) |        | 1.46E+08 | 6.28E+07  | 1.67E+08 | 6.63E+07  | 2.63E+07 | 0.00E+00 | 1.66E+07 | 2.11E+07 | 1.48E+06 | 3.97E+08 | 3.52E+08 | 9.34E+08 |
| DG(34:3E)+H       | DG | (34:3E) |        | 7.23E+07 | 6.80E+06  | 6.70E+07 | 5.62E+08  | 1.73E+09 | 1.70E+09 | 4.16E+07 | 2.07E+09 | 1.34E+09 | 8.98E+07 | 2.59E+07 | 6.33E+07 |
| DG(34:3E)+H       | DG | (34:3E) |        | 0.00E+00 | 0.00E+00  | 1.39E+06 | 5.24E+08  | 9.91E+07 | 5.23E+07 | 0.00E+00 | 1.14E+07 | 1.05E+06 | 0.00E+00 | 1.30E+07 | 1.42E+08 |
| DG(34:3E)+H       | DG | (34:3E) |        | 0.00E+00 | 0.00E+00  | 0.00E+00 | 3.51E+08  | 1.88E+08 | 9.34E+08 | 5.79E+05 | 1.53E+07 | 3.57E+06 | 3.39E+08 | 7.37E+08 | 8.37E+08 |
| DG(34:3E)+H       | DG | (34:3E) |        | 1.29E+07 | 5.83E+05  | 5.18E+06 | 3.57E+08  | 7.16E+08 | 1.36E+09 | 1.34E+06 | 5.94E+08 | 2.28E+08 | 7.74E+08 | 1.81E+09 | 1.31E+09 |
| DG(34:3E)+H       | DG | (34:3E) |        | 4.96E+04 | 3.97E+04  | 3.72E+02 | 1.63E+06  | 1.59E+06 | 8.88E+06 | 3.93E+05 | 2.09E+06 | 2.86E+05 | 3.10E+06 | 3.99E+07 | 1.56E+07 |
| DG(34:3E)+H       | DG | (34:3E) |        | 2.20E+04 | 0.00E+00  | 4.60E+02 | 1.09E+06  | 4.32E+05 | 5.30E+06 | 1.65E+05 | 3.15E+05 | 2.66E+05 | 2.54E+06 | 3.78E+06 | 1.01E+06 |
| DG(16:1/18:3)+NH4 | DG | (16:1)  | (18:3) | 0.00E+00 | 0.00E+00  | 0.00E+00 | 1.09E+06  | 1.57E+06 | 7.03E+07 | 0.00E+00 | 5.54E+06 | 1.70E+07 | 0.00E+00 | 0.00E+00 | 1.01E+09 |
| DG(16:1/18:3)+NH4 | DG | (16:1)  | (18:3) | 8.21E+05 | 0.00E+00  | 0.00E+00 | 1.00E+08  | 1.57E+08 | 1.28E+08 | 1.10E+06 | 4.63E+07 | 6.71E+07 | 6.85E+07 | 2.09E+08 | 1.40E+08 |
| DG(34:4E)+H       | DG | (34:4E) |        | 0.00E+00 | 1.11E+06  | 1.29E+06 | 1.06E+08  | 4.84E+07 | 6.70E+07 | 0.00E+00 | 5.33E+07 | 4.05E+06 | 2.57E+07 | 7.05E+07 | 1.01E+07 |
| DG(34:4E)+H       | DG | (34:4E) |        | 0.00E+00 | 0.00E+00  | 0.00E+00 | 9.25E+07  | 1.05E+08 | 2.70E+08 | 0.00E+00 | 9.68E+06 | 0.00E+00 | 3.43E+07 | 1.26E+08 | 8.57E+07 |
| DG(18:4/16:1)+H   | DG | (18:4)  | (16:1) | 0.00E+00 | 0.00E+00  | 0.00E+00 | 1.31E+08  | 1.03E+08 | 1.87E+08 | 0.00E+00 | 6.23E+07 | 3.42E+07 | 6.62E+07 | 4.17E+07 | 2.59E+07 |
| DG(17:0/18:1)+NH4 | DG | (17:0)  | (18:1) | 1.36E+07 | 6.69E+06  | 4.68E+06 | 1.92E+08  | 1.33E+08 | 2.02E+08 | 7.13E+06 | 9.78E+07 | 4.57E+07 | 0.00E+00 | 1.69E+08 | 7.69E+07 |
| DG(17:1/18:1)+NH4 | DG | (17:1)  | (18:1) | 0.00E+00 | 0.00E+00  | 0.00E+00 | 2.89E+08  | 0.00E+00 | 1.37E+08 | 1.37E+08 | 2.30E+07 | 3.01E+07 | 3.99E+07 | 1.27E+08 | 1.27E+08 |
| DG(17:1/18:2)+NH4 | DG | (17:1)  | (18:2) | 0.00E+00 | 0.00E+00  | 0.00E+00 | 3.89E+07  | 1.08E+08 | 1.42E+08 | 0.00E+00 | 2.91E+07 | 7.11E+07 | 7.11E+07 | 1.32E+08 | 9.79E+07 |
| DG(35:3E)+H       | DG | (35:3E) |        | 0.00E+00 | 0.00E+00  | 0.00E+00 | 1.24E+07  | 1.82E+07 | 7.16E+06 | 0.00E+00 | 8.35E+06 | 9.61E+05 | 9.37E+06 | 1.03E+07 | 6.69E+06 |
| DG(18:0/18:0)+NH4 | DG | (18:0)  | (18:0) | 1.40E+09 | 2.12E+09  | 1.28E+09 | 7.71E+08  | 6.11E+08 | 4.61E+08 | 2.84E+09 | 6.11E+08 | 3.22E+08 | 4.95E+08 | 8.12E+08 | 1.15E+08 |
| DG(18:0/18:1)+NH4 | DG | (18:0)  | (18:1) | 4.41E+08 | 1.27E+08  | 2.48E+08 | 1.97E+09  | 1.82E+09 | 8.31E+08 | 7.62E+07 | 6.11E+08 | 2.98E+08 | 1.18E+09 | 9.45E+08 | 1.15E+08 |
| DG(36:1E)+H       | DG | (36:1E) |        | 7.29E+08 | 8.38E+08  | 2.99E+08 | 3.75E+08  | 3.16E+08 | 2.33E+08 | 6.34E+08 | 3.51E+08 | 6.82E+08 | 2.87E+08 | 4.04E+08 | 2.35E+08 |
| DG(18:1/18:1)+NH4 | DG | (18:1)  | (18:1) | 0.00E+00 | 0.00E+00  | 0.00E+00 | 1.07E+06  | 1.05E+05 | 1.69E+05 | 3.12E+05 | 3.27E+05 | 1.69E+05 | 1.69E+05 | 1.69E+05 | 1.69E+05 |
| DG(18:1/18:1)+NH4 | DG | (18:1)  | (18:1) | 0.00E+00 | 0.00E+00  | 0.00E+00 | 0.00E+00  | 0.00E+00 | 2.43E+06 | 8.89E+06 | 8.05E+06 | 1.43E+07 | 4.91E+05 | 1.24E+06 | 5.31E+06 |
| DG(18:1/18:1)+NH4 | DG | (18:1)  | (18:1) | 0.00E+00 | 0.00E+00  | 0.00E+00 | 0.00E+00  | 6.95E+05 | 1.13E+06 | 4.60E+06 | 4.84E+03 | 3.19E+05 | 0.00E+00 | 2.39E+06 | 3.68E+06 |
| DG(18:1/18:1)+NH4 | DG | (18:1)  | (18:1) | 0.00E+00 | 0.00E+00  | 0.00E+00 | 0.00E+00  | 1.15E+04 | 3.50E+05 | 1.60E+06 | 0.00E+00 | 1.62E+05 | 0.00E+00 | 2.68E+06 | 3.73E+06 |
| DG(18:1/18:1)+NH4 | DG | (18:1)  | (18:1) | 0.00E+00 | 0.00E+00  | 0.00E+00 | 0.00E+00  | 2.73E+06 | 1.40E+06 | 1.79E+07 | 8.59E+05 | 2.27E+05 | 1.74E+06 | 6.90E+06 |          |
| DG(18:1/18:1)+NH4 | DG | (18:1)  | (18:1) | 0.00E+00 | 0.00E+00  | 0.00E+00 | 0.00E+00  | 0.00E+00 | 9.20E+05 | 5.15E+06 | 4.68E+05 | 0.00E+00 | 0.00E+00 | 2.42E+06 | 7.79E+04 |
| DG(18:1/18:1)+NH4 | DG | (18:1)  | (18:1) | 1.18E+09 | 8.04E+08  | 6.50E+08 | 2.13E+10  | 2.15E+10 | 1.82E+10 | 6.38E+08 | 1.94E+09 | 3.95E+09 | 1.85E+10 | 2.04E+09 | 1.38E+10 |
| DG(18:1/18:1)+NH4 | DG | (18:1)  | (18:1) | 0.00E+00 | 0.00E+00  | 0.00E+00 | 2.12E+06  | 0.00E+00 | 7.71E+06 | 0.00E+00 | 2.12E+06 | 0.00E+00 | 3.00E+06 | 0.00E+00 | 1.79E+06 |
| DG(18:1/18:1)+NH4 | DG | (18:1)  | (18:1) | 5.43E+04 | 3.94E+03  | 0.00E+00 | 7.82E+06  | 4.72E+07 | 1.20E+07 | 3.37E+06 | 5.69E+   |          |          |          |          |

|                      |     |         |          |          |          |          |          |          |          |          |          |          |          |          |
|----------------------|-----|---------|----------|----------|----------|----------|----------|----------|----------|----------|----------|----------|----------|----------|
| DG(49:8)+(CH3CH2)3NH | DG  | (49:8)  | 2.34E+06 | 0.00E+00 | 0.00E+00 | 2.59E+08 | 1.30E+08 | 1.02E+08 | 0.00E+00 | 6.98E+07 | 1.29E+06 | 1.48E+08 | 1.41E+08 | 1.21E+08 |
| DG(51:9)+(CH3CH2)3NH | DG  | (51:9)  | 0.00E+00 | 0.00E+00 | 0.00E+00 | 4.16E+08 | 1.44E+08 | 1.23E+08 | 0.00E+00 | 4.50E+07 | 5.49E+06 | 2.15E+08 | 1.31E+08 | 9.30E+07 |
| DG(52:3)+NH4         | DG  | (52:3)  | 2.61E+06 | 1.75E+07 | 0.00E+00 | 1.56E+07 | 1.56E+07 | 1.84E+07 | 0.00E+00 | 1.54E+07 | 1.17E+06 | 5.16E+07 | 3.58E+06 | 3.63E+04 |
| DG(54:4)+NH4         | DG  | (54:4)  | 1.11E+07 | 7.06E+06 | 0.00E+00 | 5.13E+06 | 5.13E+06 | 2.94E+07 | 0.00E+00 | 3.28E+06 | 1.17E+07 | 2.08E+06 | 4.20E+06 | 0.00E+00 |
| DG(54:6)+NH4         | DG  | (54:6)  | 1.91E+07 | 1.18E+07 | 1.09E+06 | 0.00E+00 | 0.00E+00 | 0.00E+00 | 1.04E+06 | 0.00E+00 | 0.00E+00 | 0.00E+00 | 0.00E+00 | 0.00E+00 |
| DG(54:7)+H           | DG  | (54:7)  | 0.00E+00 | 0.00E+00 | 0.00E+00 | 1.96E+08 | 7.85E+07 | 1.66E+09 | 0.00E+00 | 5.47E+07 | 3.30E+06 | 7.64E+08 | 1.11E+09 | 1.08E+09 |
| DG(56:5)+H           | DG  | (56:5)  | 0.00E+00 | 0.00E+00 | 0.00E+00 | 1.91E+08 | 1.81E+08 | 2.25E+08 | 0.00E+00 | 2.06E+07 | 1.78E+06 | 1.09E+08 | 1.28E+08 | 1.47E+08 |
| DG(56:6)+NH4         | DG  | (56:6)  | 8.77E+06 | 7.45E+06 | 1.52E+06 | 0.00E+00 | 9.92E+06 | 4.16E+06 | 1.33E+07 | 2.55E+06 | 1.90E+06 | 3.88E+06 | 0.00E+00 | 0.00E+00 |
| UPC(14:0)+HCOO       | UPC | (14:0)  | 2.43E+06 | 3.23E+06 | 2.31E+06 | 2.09E+06 | 4.69E+06 | 1.28E+06 | 5.68E+06 | 5.20E+06 | 3.30E+06 | 7.96E+06 | 1.25E+07 | 1.45E+07 |
| UPC(14:0)+H          | UPC | (14:0)  | 2.20E+07 | 6.22E+06 | 9.65E+06 | 1.89E+07 | 3.25E+07 | 5.59E+07 | 3.60E+07 | 1.88E+07 | 4.08E+07 | 3.80E+07 | 0.00E+00 | 6.54E+07 |
| UPC(15:0)+H          | UPC | (15:0)  | 1.86E+07 | 1.83E+07 | 1.32E+07 | 3.28E+06 | 2.37E+07 | 8.93E+06 | 3.86E+07 | 2.15E+07 | 3.88E+07 | 2.64E+07 | 5.81E+07 | 5.25E+07 |
| UPC(15:0)+H          | UPC | (15:0)  | 5.05E+06 | 7.22E+06 | 2.27E+07 | 1.54E+06 | 3.33E+06 | 6.57E+06 | 7.95E+06 | 1.12E+07 | 1.09E+07 | 1.07E+07 | 2.78E+07 | 1.18E+07 |
| UPC(15:0)+H          | UPC | (15:0)  | 2.10E+07 | 1.28E+07 | 2.09E+07 | 3.81E+07 | 8.22E+07 | 3.20E+07 | 4.54E+07 | 6.16E+07 | 6.14E+07 | 9.15E+07 | 7.39E+07 | 7.39E+07 |
| UPC(15:1)+H          | UPC | (15:1)  | 2.21E+08 | 8.53E+07 | 2.77E+08 | 7.90E+08 | 2.73E+08 | 1.43E+09 | 2.20E+08 | 2.36E+08 | 2.72E+08 | 4.20E+08 | 9.91E+08 | 1.06E+09 |
| UPC(15:1)+H          | UPC | (15:1)  | 1.59E+08 | 1.24E+08 | 0.00E+00 | 1.41E+06 | 0.00E+00 |
| UPC(16:0)+HCOO       | UPC | (16:0)  | 7.03E+07 | 4.52E+07 | 6.96E+07 | 7.49E+07 | 1.15E+08 | 1.10E+08 | 1.43E+08 | 1.61E+08 | 1.33E+08 | 1.09E+08 | 2.57E+08 | 2.52E+08 |
| UPC(16:0)+H          | UPC | (16:0)  | 2.94E+08 | 2.12E+08 | 2.69E+08 | 3.39E+08 | 4.71E+08 | 4.80E+08 | 6.12E+08 | 7.02E+08 | 5.89E+08 | 4.80E+08 | 1.11E+09 | 1.09E+09 |
| UPC(16:0)+HCOO       | UPC | (16:0)  | 7.33E+08 | 5.32E+08 | 6.78E+08 | 9.71E+08 | 1.28E+09 | 1.65E+09 | 1.13E+09 | 1.45E+09 | 1.22E+09 | 1.22E+09 | 3.03E+09 | 3.62E+09 |
| UPC(16:0)+H          | UPC | (16:0)  | 3.56E+09 | 2.43E+09 | 2.95E+09 | 4.55E+09 | 6.02E+09 | 7.61E+09 | 5.33E+09 | 6.86E+09 | 6.14E+09 | 6.38E+09 | 1.66E+10 | 2.08E+10 |
| UPC(16:0)+HCOO       | UPC | (16:0)  | 0.00E+00 | 0.00E+00 | 1.44E+06 | 8.88E+05 | 0.00E+00 | 0.00E+00 | 0.00E+00 | 0.00E+00 | 1.79E+06 | 4.52E+06 | 0.00E+00 | 0.00E+00 |
| UPC(16:0)+H          | UPC | (16:0)  | 0.00E+00 | 0.00E+00 | 8.30E+06 | 4.80E+06 | 8.27E+06 | 0.00E+00 | 7.12E+06 | 0.00E+00 | 1.61E+07 | 0.00E+00 | 0.00E+00 | 4.75E+07 |
| UPC(16:0)+H          | UPC | (16:0)  | 0.00E+00 | 8.03E+06 | 4.45E+06 | 2.46E+06 | 1.29E+07 | 1.48E+06 | 7.65E+06 | 0.00E+00 | 0.00E+00 | 0.00E+00 | 6.09E+06 | 1.29E+07 |
| UPC(16:0)+H          | UPC | (16:0)  | 2.27E+06 | 2.08E+06 | 2.84E+06 | 3.54E+06 | 1.01E+06 | 2.13E+07 | 1.26E+07 | 0.00E+00 | 5.41E+06 | 0.00E+00 | 1.58E+07 | 1.24E+07 |
| UPC(16:0)+HCOO       | UPC | (16:0)  | 4.76E+07 | 8.61E+06 | 2.58E+07 | 4.36E+07 | 8.19E+07 | 2.80E+07 | 6.36E+07 | 5.69E+07 | 4.73E+07 | 3.96E+07 | 7.12E+07 | 6.95E+07 |
| UPC(16:0e)+H         | UPC | (16:0e) | 1.48E+08 | 1.90E+02 | 1.37E+08 | 2.48E+08 | 4.48E+08 | 2.24E+08 | 3.84E+08 | 3.16E+08 | 2.67E+08 | 3.61E+08 | 1.42E+08 | 3.82E+08 |
| UPC(16:0e)+H         | UPC | (16:0e) | 2.65E+08 | 7.21E+07 | 1.36E+08 | 2.52E+08 | 4.19E+08 | 2.28E+08 | 3.66E+08 | 3.10E+08 | 2.71E+08 | 3.61E+08 | 2.50E+08 | 1.75E+08 |
| UPC(16:0p)+HCOO      | UPC | (16:0p) | 4.06E+07 | 1.43E+07 | 3.71E+07 | 5.09E+07 | 7.50E+07 | 4.48E+07 | 3.06E+07 | 2.74E+08 | 6.07E+07 | 7.68E+07 | 4.69E+07 | 4.69E+07 |
| UPC(16:0p)+H         | UPC | (16:0p) | 1.10E+08 | 1.02E+08 | 7.84E+07 | 1.34E+08 | 3.86E+08 | 1.36E+08 | 1.50E+08 | 1.43E+09 | 2.58E+08 | 3.12E+08 | 3.15E+08 | 4.54E+08 |
| UPC(17:0)+HCOO       | UPC | (16:0p) | 4.17E+06 | 4.77E+06 | 0.00E+00 | 0.00E+00 | 0.00E+00 | 1.26E+07 | 0.00E+00 | 0.00E+00 | 0.00E+00 | 0.00E+00 | 0.00E+00 | 0.00E+00 |
| UPC(17:0)+HCOO       | UPC | (16:1)  | 2.76E+06 | 2.91E+06 | 4.40E+06 | 2.47E+07 | 4.79E+07 | 5.56E+07 | 4.30E+07 | 1.24E+07 | 8.12E+06 | 4.20E+07 | 1.20E+08 | 1.06E+08 |
| UPC(16:1)+H          | UPC | (16:1)  | 2.27E+07 | 5.56E+06 | 1.05E+08 | 2.11E+08 | 1.41E+08 | 3.61E+08 | 1.40E+08 | 1.18E+08 | 1.16E+08 | 2.52E+08 | 5.56E+08 | 4.74E+08 |
| UPC(16:1)+HCOO       | UPC | (16:1)  | 1.60E+07 | 2.15E+07 | 1.96E+07 | 2.42E+07 | 1.24E+07 | 5.88E+07 | 4.28E+07 | 7.51E+06 | 1.62E+07 | 3.85E+07 | 1.05E+08 | 9.74E+07 |
| UPC(16:1)+H          | UPC | (16:1)  | 1.23E+08 | 8.76E+07 | 1.04E+08 | 5.82E+07 | 1.39E+08 | 3.08E+08 | 1.41E+08 | 1.31E+08 | 1.03E+08 | 2.41E+08 | 5.77E+08 | 4.97E+08 |
| UPC(17:0)+HCOO       | UPC | (17:0)  | 0.00E+00 | 0.00E+00 | 2.06E+02 | 3.29E+06 | 5.27E+06 | 2.00E+06 | 3.82E+06 | 7.22E+06 | 4.73E+06 | 4.37E+06 | 8.52E+06 | 5.26E+06 |
| UPC(17:0)+H          | UPC | (17:0)  | 7.70E+06 | 0.00E+00 | 6.53E+06 | 5.11E+06 | 2.73E+07 | 5.23E+06 | 1.84E+07 | 3.31E+07 | 1.02E+08 | 1.85E+07 | 3.81E+07 | 3.19E+07 |
| UPC(17:0)+HCOO       | UPC | (17:0)  | 2.14E+07 | 2.32E+05 | 4.30E+06 | 2.26E+07 | 2.99E+07 | 6.13E+06 | 1.90E+07 | 3.78E+07 | 1.90E+07 | 1.15E+07 | 3.01E+07 | 2.93E+07 |
| UPC(17:0)+H          | UPC | (17:0)  | 7.78E+06 | 1.42E+07 | 3.93E+07 | 1.16E+08 | 1.34E+08 | 6.86E+07 | 6.78E+07 | 1.47E+08 | 9.98E+07 | 9.10E+07 | 1.31E+08 | 1.51E+08 |
| UPC(17:1)+HCOO       | UPC | (17:1)  | 0.00E+00 | 1.99E+04 | 9.48E+04 | 4.46E+05 | 7.45E+05 | 3.98E+05 | 5.85E+05 | 1.26E+06 | 1.38E+05 | 3.57E+05 | 4.39E+06 | 2.38E+06 |
| UPC(17:1)+H          | UPC | (17:1)  | 4.29E+05 | 1.82E+03 | 2.53E+06 | 1.31E+06 | 7.31E+06 | 2.74E+06 | 2.03E+06 | 2.20E+06 | 6.38E+06 | 8.49E+06 | 4.34E+07 | 9.01E+06 |
| UPC(18:0)+HCOO       | UPC | (18:0)  | 3.19E+07 | 2.11E+07 | 3.66E+07 | 8.48E+08 | 1.32E+09 | 6.79E+07 | 7.83E+08 | 1.52E+09 | 1.87E+08 | 1.95E+09 | 1.51E+09 | 1.86E+09 |
| UPC(18:0)+H          | UPC | (18:0)  | 1.19E+08 | 7.21E+07 | 1.57E+08 | 3.54E+09 | 5.88E+09 | 2.76E+08 | 2.67E+09 | 6.68E+08 | 3.63E+09 | 5.09E+09 | 9.44E+09 | 7.13E+08 |
| UPC(18:0)+HCOO       | UPC | (18:0)  | 4.16E+08 | 2.84E+08 | 3.33E+08 | 8.48E+08 | 1.32E+09 | 8.93E+08 | 7.38E+08 | 1.07E+09 | 1.89E+08 | 1.19E+09 | 2.04E+09 | 1.78E+09 |
| UPC(18:0)+H          | UPC | (18:0)  | 1.33E+09 | 1.02E+09 | 1.19E+09 | 4.21E+09 | 5.23E+09 | 4.47E+09 | 2.59E+09 | 6.75E+09 | 3.25E+09 | 5.87E+09 | 6.40E+09 | 8.82E+09 |
| UPC(18:0)+H          | UPC | (18:0)  | 1.08E+09 | 9.95E+08 | 1.22E+09 | 4.17E+09 | 4.23E+09 | 4.62E+09 | 2.81E+09 | 5.09E+09 | 3.74E+09 | 5.56E+09 | 8.58E+09 | 8.43E+09 |
| UPC(18:0)+H          | UPC | (18:0)  | 5.60E+06 | 8.03E+06 | 1.02E+06 | 0.00E+00 | 0.00E+00 | 2.43E+07 | 4.62E+06 | 0.00E+00 | 5.34E+06 | 1.28E+07 | 1.81E+07 | 0.00E+00 |
| UPC(18:0)+H          | UPC | (18:0)  | 2.21E+04 | 0.00E+00 | 3.23E+05 | 3.42E+05 | 2.17E+05 | 3.32E+04 | 1.34E+06 | 1.14E+06 | 2.48E+05 | 1.51E+04 | 4.47E+05 | 4.47E+05 |
| UPC(18:0e)+H         | UPC | (18:0e) | 1.38E+08 | 1.54E+08 | 6.18E+07 | 2.70E+08 | 2.91E+08 | 5.42E+08 | 9.91E+07 | 1.41E+08 | 1.17E+08 | 3.70E+08 | 7.87E+08 | 6.04E+08 |
| UPC(18:0e)+H         | UPC | (18:0e) | 1.87E+08 | 4.22E+05 | 6.79E+07 | 1.77E+08 | 1.49E+08 | 1.41E+08 | 7.80E+07 | 8.72E+07 | 1.40E+08 | 1.19E+08 | 6.41E+08 | 5.41E+08 |
| UPC(18:0p)+HCOO      | UPC | (18:0p) | 2.01E+08 | 4.86E+07 | 1.18E+08 | 2.43E+08 | 3.77E+08 | 2.08E+08 | 3.83E+08 | 2.38E+08 | 1.79E+08 | 3.16E+08 | 4.04E+08 | 4.04E+08 |
| UPC(18:0p)+H         | UPC | (18:0p) | 3.64E+07 | 6.75E+06 | 2.31E+07 | 4.25E+07 | 6.78E+07 | 3.48E+07 | 6.84E+07 | 4.24E+07 | 2.13E+07 | 4.02E+07 | 5.46E+07 | 6.95E+07 |
| UPC(18:0p)+HCOO      | UPC | (18:0p) | 3.64E+07 | 1.27E+07 | 2.31E+07 | 4.36E+07 | 6.78E+07 | 4.51E+07 | 6.84E+07 | 4.24E+07 | 1.20E+07 | 4.07E+07 | 6.99E+06 | 6.99E+06 |
| UPC(18:0p)+HCOO      | UPC | (18:0p) | 0.00E+00 | 0.00E+00 | 0.00E+00 | 1.50E+04 | 0.00E+00 | 0.00E+00 | 2.74E+05 | 3.12E+07 | 7.21E+05 | 0.00E+00 | 5.55E+05 | 7.81E+05 |
| UPC(18:0p)+H         | UPC | (18:0p) | 1.41E+07 | 2.73E+05 | 1.04E+07 | 1.37E+08 | 2.92E+07 | 8.30E+07 | 3.38E+06 | 3.85E+08 | 1.99E+07 | 1.33E+08 | 4.93E+07 | 1.73E+08 |
| UPC(18:1)+HCOO       | UPC | (18:1)  | 3.92E+07 | 3.36E+07 | 4.11E+07 | 4.10E+07 | 4.58E+07 | 3.78E+07 | 3.99E+07 | 6.73E+07 | 4.58E+07 | 3.78E+07 | 5.25E+07 | 5.25E+07 |
| UPC(18:1)+H          | UPC | (18:1)  | 2.57E+08 | 1.29E+08 | 1.86E+08 | 2.15E+08 | 2.74E+08 | 2.79E+08 | 1.54E+09 | 2.32E+08 | 2.34E+08 | 3.20E+08 | 7.66E+08 | 9.80E+08 |
| UPC(18:1)+HCOO       | UPC | (18:1)  | 2.00E+08 | 1.49E+08 | 1.90E+08 | 2.80E+08 | 3.13E+08 | 4.45E+08 | 3.00E+08 | 2.23E+08 | 2.23E+08 | 3.34E+08 | 7.90E+08 | 8.53E+08 |
| UPC(18:1)+H          | UPC | (18:1)  | 7.95E+08 | 6.33E+08 | 7.66E+08 | 1.58E+09 | 1.44E+09 | 2.35E+09 | 1.42E+09 | 1.05E+09 | 1.01E+09 | 1.56E+09 | 4.21E+09 | 4.82E+09 |
| UPC(18:1p)+H         | UPC | (18:1p) | 2.16E+06 | 7.60E+07 | 6.95E+05 | 0.00E+00 | 2.07E+07 | 0.00E+00 | 2.17E+07 | 4.93E+06 | 4.99E+06 | 2.86E+07 | 4.11E+07 | 0.00E+00 |
| UPC(18:1p)+HCOO      | UPC | (18:1p) | 2.13E+06 | 0.00E+00 | 1.63E+06 | 1.30E+06 | 9.02E+05 | 2.52E+06 | 7.13E+05 | 9.43E+06 | 7.57E+05 | 1.28E+06 | 5.30E+06 | 2.50E+06 |
| UPC(18:1p)+H         | UPC | (18:1p) | 9.34E+06 | 3.94E+06 | 6.99E+06 | 2.22E+07 | 1.05E+07 | 6.26E+06 | 8.05E+06 | 8.61E+07 | 2.08E+07 | 3.95E+07 | 3.76E+07 | 3.55E+07 |
| UPC(18:1p)+H         | UPC | (18:1p) | 0.00E+00 | 1.50E+06 | 1.00E+06 | 1.00E+06 | 1.00E+06 | 1.00E+06 | 1.00E+06 | 6.38E+06 | 1.09E+06 | 6.38E+06 | 5.26E+06 | 5.26E+06 |
| UPC(18:2)+HCOO       | UPC | (18:2)  | 1.82E+07 | 1.11E+07 | 1.41E+07 | 1.23E+08 | 2.00E+08 | 2.82E+07 | 1.12E+08 | 1.93E+07 | 8.93E+07 | 1.64E+08 | 2.55E+08 | 2.63E+08 |
| UPC(18:2)+H          | UPC | (18:2)  | 8.66E+07 | 5.71E+07 | 9.55E+07 | 7.42E+08 | 1.02E+09 | 7.12E+08 | 6.00E+08 | 6.32E+08 | 4.65E+08 | 8.75E+08 | 1.38E+09 | 1.59E+09 |
| UPC(18:2)+HCOO       | UPC | (18:2)  | 4.47E+07 | 4.70E+07 | 4.28E+07 | 1.21E+08 | 2.07E+08 | 1.15E+08 | 1.10E+08 | 1.08E+08 | 8.98E+07 | 1.41E+08 | 2.34E+08 | 2.63E+08 |
| UPC(18:2)+H          | UPC | (18:2)  | 2.60E+08 | 2.67E+08 | 2.62E+08 | 7.02E+08 | 1.21E+09 | 7.75E+08 | 5.15E+08 |          |          |          |          |          |

|              |      |         |          |          |          |          |          |          |          |          |          |          |          |          |
|--------------|------|---------|----------|----------|----------|----------|----------|----------|----------|----------|----------|----------|----------|----------|
| LPC(24:4)+H  | LPC  | (24:4)  | 1.15E+07 | 0.00E+00 | 1.76E+07 | 1.71E+07 | 2.01E+07 | 2.55E+06 | 1.66E+06 | 2.13E+07 | 2.02E+07 | 1.93E+07 | 3.28E+07 | 2.22E+07 |
| LPC(26:4)+H  | LPC  | (26:1)  | 0.00E+00 | 0.00E+00 | 0.00E+00 | 2.79E+06 | 4.33E+05 | 6.17E+06 | 0.00E+00 | 4.05E+05 | 0.00E+00 | 2.82E+06 | 2.20E+06 | 1.63E+07 |
| LPC(26:4)+H  | LPC  | (26:4)  | 1.47E+07 | 1.40E+07 | 9.04E+06 | 4.70E+06 | 1.19E+06 | 1.04E+07 | 7.31E+05 | 3.29E+06 | 5.08E+06 | 4.88E+06 | 2.62E+07 | 4.20E+07 |
| LPC(33:4)+H  | LPC  | (33:5)  | 1.09E+07 | 1.25E+07 | 2.60E+06 | 1.90E+07 | 1.85E+07 | 2.06E+07 | 1.80E+06 | 1.80E+06 | 2.15E+07 | 2.15E+07 | 3.32E+07 | 7.50E+06 |
| LPC(33:4)+H  | LPC  | (33:5)  | 8.03E+07 | 1.85E+07 | 8.14E+07 | 1.05E+06 | 1.11E+06 | 9.23E+06 | 3.73E+07 | 4.51E+07 | 4.92E+07 | 3.82E+06 | 2.48E+07 | 3.96E+07 |
| LPC(35:5)+H  | LPC  | (35:5)  | 5.23E+03 | 0.00E+00 | 0.00E+00 | 0.00E+00 | 3.73E+06 | 1.88E+06 | 1.82E+06 | 3.79E+07 | 4.68E+04 | 2.43E+06 | 9.55E+05 | 0.00E+00 |
| LPC(35:6)+H  | LPC  | (35:6)  | 4.27E+09 | 1.59E+08 | 3.57E+09 | 3.61E+09 | 2.91E+09 | 4.65E+09 | 4.32E+09 | 3.57E+09 | 3.75E+09 | 3.52E+09 | 3.71E+09 | 5.44E+09 |
| LPC(37:5)+H  | LPC  | (37:5)  | 1.99E+07 | 0.00E+00 | 7.16E+07 | 8.42E+07 | 1.82E+08 | 1.17E+07 | 2.48E+08 | 9.09E+07 | 2.20E+08 | 4.98E+07 | 1.20E+07 |          |
| LPC(37:5)+H  | LPC  | (37:5)  | 8.36E+08 | 5.15E+08 | 7.78E+08 | 5.00E+08 | 9.45E+08 | 4.70E+08 | 8.17E+08 | 1.14E+09 | 1.39E+09 | 6.69E+08 | 1.02E+09 | 4.34E+08 |
| LPC(37:6)+H  | LPC  | (37:6)  | 1.04E+09 | 5.69E+08 | 7.44E+08 | 6.13E+08 | 6.82E+08 | 8.24E+08 | 8.77E+08 | 1.13E+09 | 1.33E+09 | 2.78E+07 | 4.89E+08 | 7.50E+08 |
| LPE(16:0)+H  | LPE  | (16:0)  | 1.85E+07 | 1.60E+07 | 1.23E+07 | 1.96E+07 | 1.81E+07 | 3.28E+07 | 1.74E+07 | 2.06E+07 | 1.95E+07 | 2.78E+07 | 8.11E+07 | 8.64E+07 |
| LPE(16:0)+H  | LPE  | (16:0)  | 1.46E+08 | 1.07E+08 | 1.10E+08 | 1.99E+08 | 1.50E+08 | 3.34E+08 | 1.39E+08 | 1.87E+08 | 1.70E+08 | 2.59E+08 | 7.41E+08 | 9.32E+08 |
| LPE(16:0p)+H | LPE  | (16:0p) | 3.71E+08 | 2.01E+08 | 3.05E+08 | 4.25E+08 | 5.90E+08 | 4.26E+08 | 4.41E+08 | 7.04E+08 | 4.49E+08 | 6.17E+08 | 1.23E+09 | 1.21E+09 |
| LPE(16:1)+H  | LPE  | (16:1)  | 3.27E+06 | 2.89E+05 | 2.68E+06 | 2.03E+07 | 1.35E+07 | 2.40E+07 | 8.99E+05 | 1.21E+05 | 5.78E+06 | 2.04E+07 | 6.10E+07 | 4.52E+07 |
| LPE(16:1)+H  | LPE  | (16:1)  | 8.38E+06 | 7.00E+06 | 2.78E+06 | 2.02E+07 | 4.33E+06 | 7.32E+06 | 6.43E+06 | 2.61E+06 | 9.46E+05 | 1.52E+06 | 5.71E+07 | 7.96E+07 |
| LPE(17:0)+H  | LPE  | (17:0)  | 6.73E+02 | 1.06E+06 | 1.02E+06 | 3.82E+06 | 3.69E+06 | 3.03E+06 | 1.89E+06 | 2.00E+06 | 1.07E+06 | 2.70E+06 | 3.44E+06 | 1.87E+06 |
| LPE(18:0)+H  | LPE  | (18:0)  | 1.89E+07 | 1.55E+04 | 1.74E+07 | 7.43E+08 | 7.55E+08 | 4.99E+07 | 3.61E+08 | 1.09E+08 | 5.82E+08 | 1.25E+09 | 9.59E+07 | 9.35E+07 |
| LPE(18:0)+H  | LPE  | (18:0)  | 3.15E+08 | 2.48E+08 | 2.10E+08 | 1.13E+09 | 9.84E+08 | 4.91E+08 | 3.80E+08 | 7.44E+08 | 5.58E+08 | 1.11E+09 | 1.45E+09 | 1.59E+09 |
| LPE(18:0p)+H | LPE  | (18:0p) | 1.39E+08 | 9.22E+07 | 9.24E+07 | 3.30E+08 | 2.76E+08 | 2.18E+08 | 1.30E+08 | 6.90E+08 | 2.35E+08 | 3.63E+08 | 5.15E+08 | 6.03E+08 |
| LPE(18:1)+H  | LPE  | (18:1)  | 6.73E+07 | 4.99E+07 | 3.45E+07 | 5.21E+07 | 5.30E+07 | 5.10E+07 | 2.21E+07 | 2.89E+07 | 2.89E+07 | 5.37E+07 | 1.62E+08 | 2.02E+08 |
| LPE(18:1)+H  | LPE  | (18:1)  | 1.96E+08 | 1.09E+08 | 2.07E+08 | 2.77E+08 | 2.51E+08 | 3.49E+08 | 2.19E+08 | 1.58E+08 | 1.09E+08 | 1.57E+08 | 5.30E+08 | 6.71E+08 |
| LPE(18:1)+H  | LPE  | (18:1)  | 2.04E+08 | 1.23E+08 | 2.20E+08 | 2.45E+08 | 1.02E+08 | 3.67E+08 | 2.40E+08 | 1.58E+08 | 1.67E+08 | 0.00E+00 | 3.88E+08 | 5.48E+08 |
| LPE(18:2)+H  | LPE  | (18:2p) | 1.64E+08 | 9.73E+07 | 1.41E+08 | 1.64E+08 | 2.03E+08 | 1.67E+08 | 1.41E+08 | 2.41E+08 | 2.18E+08 | 2.52E+08 | 6.49E+08 | 6.39E+08 |
| LPE(18:2)+H  | LPE  | (18:2)  | 1.07E+07 | 9.21E+06 | 4.26E+06 | 4.75E+07 | 6.68E+07 | 3.47E+07 | 2.71E+07 | 3.26E+06 | 2.54E+07 | 5.25E+07 | 7.26E+07 | 8.32E+07 |
| LPE(18:2)+H  | LPE  | (18:2)  | 2.29E+07 | 2.44E+07 | 2.16E+07 | 5.16E+07 | 6.19E+07 | 3.74E+07 | 2.43E+07 | 2.76E+07 | 5.22E+07 | 7.11E+07 | 8.51E+07 |          |
| LPE(18:2p)+H | LPE  | (18:2p) | 1.26E+06 | 9.25E+05 | 3.14E+05 | 1.50E+06 | 5.29E+06 | 1.58E+06 | 5.13E+06 | 1.05E+07 | 4.66E+06 | 1.16E+06 | 3.37E+06 | 3.62E+06 |
| LPE(20:1)+H  | LPE  | (20:1)  | 1.00E+06 | 7.86E+05 | 6.67E+05 | 1.04E+07 | 2.44E+06 | 1.38E+07 | 1.62E+06 | 1.27E+07 | 8.31E+06 | 1.10E+07 | 2.48E+07 | 5.76E+07 |
| LPE(20:2)+H  | LPE  | (20:2)  | 3.48E+05 | 1.05E+05 | 1.19E+05 | 4.68E+05 | 9.24E+05 | 1.71E+06 | 5.44E+05 | 3.00E+05 | 7.46E+05 | 2.49E+06 | 3.22E+05 | 8.79E+06 |
| LPE(20:3)+H  | LPE  | (20:3)  | 5.02E+05 | 5.59E+05 | 2.98E+05 | 5.69E+05 | 3.60E+05 | 5.59E+05 | 4.14E+05 | 4.65E+05 | 5.33E+05 | 5.09E+05 | 2.47E+06 | 2.47E+06 |
| LPE(20:3)+H  | LPE  | (20:3)  | 5.46E+05 | 2.00E+05 | 3.00E+05 | 2.33E+07 | 5.41E+07 | 2.14E+07 | 2.45E+06 | 1.92E+07 | 3.19E+07 | 3.19E+07 | 7.06E+07 | 8.95E+07 |
| LPE(20:4)+H  | LPE  | (20:4)  | 8.74E+07 | 6.52E+07 | 2.31E+07 | 1.35E+08 | 2.03E+08 | 1.03E+08 | 1.93E+08 | 1.89E+08 | 2.92E+08 | 1.60E+08 | 2.38E+08 | 2.41E+08 |
| LPE(20:4)+H  | LPE  | (20:4)  | 1.41E+08 | 8.45E+07 | 1.21E+08 | 1.39E+08 | 1.96E+08 | 1.02E+08 | 1.92E+08 | 2.01E+08 | 2.06E+08 | 1.55E+08 | 2.34E+08 | 2.42E+08 |
| LPE(20:4)+H  | LPE  | (20:4)  | 2.11E+06 | 3.09E+05 | 5.21E+06 | 4.28E+06 | 2.90E+06 | 1.37E+06 | 5.43E+05 | 3.05E+05 | 3.05E+06 | 3.50E+06 | 1.62E+07 | 1.35E+07 |
| LPE(20:5)+H  | LPE  | (20:5)  | 1.00E+06 | 1.10E+06 | 0.00E+00 | 1.78E+05 | 4.08E+05 | 1.24E+05 | 8.19E+05 | 3.42E+06 | 1.08E+07 | 3.38E+05 | 2.09E+06 | 3.14E+06 |
| LPE(22:0)+H  | LPE  | (22:0)  | 0.00E+00 | 0.00E+00 | 3.66E+05 | 8.52E+06 | 2.18E+06 | 2.38E+07 | 1.78E+08 | 1.79E+08 | 2.14E+08 | 9.49E+07 | 3.36E+08 | 4.22E+08 |
| LPE(22:4)+H  | LPE  | (22:4)  | 5.43E+08 | 5.43E+08 | 1.29E+06 | 1.87E+07 | 3.89E+07 | 1.03E+07 | 3.32E+07 | 1.18E+08 | 1.20E+08 | 1.40E+08 | 3.35E+08 | 4.24E+08 |
| LPE(22:4)+H  | LPE  | (22:4)  | 1.74E+04 | 2.95E+04 | 2.68E+04 | 1.90E+07 | 2.33E+07 | 7.07E+06 | 4.33E+06 | 5.59E+06 | 1.06E+07 | 2.10E+07 | 1.92E+07 | 1.84E+07 |
| LPE(22:4)+H  | LPE  | (22:4)  | 1.89E+07 | 4.89E+06 | 2.27E+07 | 2.05E+07 | 3.69E+07 | 1.56E+07 | 3.14E+07 | 2.32E+07 | 3.17E+07 | 3.73E+07 | 3.07E+07 | 3.39E+07 |
| LPE(22:5)+H  | LPE  | (22:5)  | 2.05E+07 | 1.57E+07 | 1.38E+07 | 9.49E+05 | 1.86E+06 | 2.30E+06 | 1.45E+07 | 2.36E+07 | 1.70E+06 | 1.70E+06 | 1.17E+07 | 5.20E+06 |
| LPE(22:5)+H  | LPE  | (22:5)  | 2.69E+07 | 2.66E+06 | 1.89E+07 | 1.07E+07 | 7.41E+05 | 6.79E+06 | 1.34E+07 | 6.62E+06 | 8.60E+06 | 7.38E+06 | 5.36E+06 | 1.30E+06 |
| LPE(22:6)+H  | LPE  | (22:6)  | 5.93E+07 | 4.80E+07 | 1.65E+08 | 5.63E+07 | 1.14E+08 | 1.29E+08 | 1.78E+08 | 1.79E+08 | 2.14E+08 | 9.49E+07 | 3.36E+08 | 4.22E+08 |
| LPE(22:6)+H  | LPE  | (22:6)  | 1.47E+08 | 1.16E+08 | 1.04E+08 | 6.18E+07 | 1.15E+08 | 1.13E+08 | 1.79E+08 | 1.80E+08 | 2.15E+08 | 1.40E+08 | 3.35E+08 | 4.24E+08 |
| LPE(24:0)+H  | LPE  | (24:0)  | 6.02E+03 | 2.93E+05 | 3.12E+05 | 3.48E+06 | 7.65E+05 | 1.90E+07 | 0.00E+00 | 2.05E+05 | 7.46E+05 | 9.87E+06 | 4.23E+06 | 1.36E+07 |
| LPE(16:0)+H  | LPEr | (16:0)  | 0.00E+00 | 0.00E+00 | 9.53E+02 | 6.13E+05 | 1.07E+06 | 6.68E+05 | 4.42E+05 | 1.72E+06 | 3.03E+05 | 1.89E+06 | 8.77E+05 | 2.02E+06 |
| LPEr(18:1)+H | LPEr | (18:1)  | 5.34E+04 | 0.00E+00 | 1.44E+05 | 1.12E+06 | 2.40E+05 | 1.69E+06 | 4.63E+05 | 3.30E+06 | 1.78E+05 | 3.05E+06 | 5.04E+06 | 8.14E+06 |
| LPEr(16:0)+H | LPEr | (16:0)  | 4.41E+04 | 8.33E+04 | 2.70E+06 | 8.27E+06 | 1.40E+07 | 5.81E+06 | 3.43E+06 | 4.60E+06 | 3.95E+06 | 1.21E+07 | 1.66E+07 | 1.47E+07 |
| LPEr(16:0)+H | LPEr | (16:0)  | 1.33E+06 | 2.60E+03 | 7.19E+05 | 1.31E+06 | 3.94E+06 | 4.82E+05 | 1.22E+05 | 0.00E+00 | 2.45E+05 | 1.84E+06 | 1.23E+06 | 2.94E+06 |
| LPEr(16:1)+H | LPEr | (16:1)  | 2.39E+06 | 2.78E+06 | 3.98E+02 | 1.79E+06 | 1.75E+06 | 3.01E+06 | 2.15E+07 | 7.91E+06 | 1.45E+06 | 1.45E+06 | 1.07E+07 | 1.07E+07 |
| LPEr(18:0)+H | LPEr | (18:0)  | 9.55E+04 | 0.00E+00 | 0.00E+00 | 2.71E+06 | 6.04E+06 | 2.05E+06 | 0.00E+00 | 2.61E+05 | 2.47E+05 | 2.71E+06 | 2.24E+05 | 4.86E+06 |
| LPEr(18:1)+H | LPEr | (18:1)  | 8.88E+06 | 6.60E+06 | 3.20E+06 | 2.78E+07 | 4.53E+07 | 1.44E+07 | 1.40E+07 | 4.29E+06 | 1.19E+07 | 1.14E+08 | 3.76E+07 | 9.07E+07 |
| LPEr(18:1)+H | LPEr | (18:1)  | 0.00E+00 | 4.65E+05 | 2.87E+03 | 6.71E+06 | 9.68E+07 | 2.73E+06 | 0.00E+00 | 8.41E+03 | 3.02E+02 | 5.73E+07 | 3.84E+07 | 3.99E+07 |
| LPEr(18:1)+H | LPEr | (18:1)  | 1.30E+07 | 3.12E+07 | 2.25E+06 | 7.85E+07 | 4.13E+08 | 6.07E+07 | 1.23E+07 | 1.95E+07 | 7.42E+06 | 1.12E+08 | 8.50E+07 | 5.84E+07 |
| LPEr(18:1)+H | LPEr | (18:1)  | 0.00E+00 | 2.08E+07 | 5.31E+06 | 4.22E+07 | 7.18E+07 | 3.33E+07 | 5.30E+06 | 8.35E+06 | 3.07E+06 | 5.74E+07 | 3.76E+07 | 1.79E+07 |
| LPEr(18:1)+H | LPEr | (18:1)  | 3.27E+06 | 3.15E+07 | 3.15E+07 | 1.42E+06 | 4.36E+07 | 0.00E+00 | 0.00E+00 | 1.09E+07 | 7.20E+06 | 0.00E+00 | 0.00E+00 | 0.00E+00 |
| LPEr(18:2)+H | LPEr | (18:2)  | 2.87E+06 | 9.93E+05 | 6.09E+06 | 2.40E+07 | 7.82E+07 | 2.19E+07 | 8.05E+06 | 1.35E+07 | 6.35E+06 | 6.64E+07 | 3.81E+07 | 5.54E+07 |
| LPEr(18:2)+H | LPEr | (18:2)  | 3.21E+03 | 2.42E+05 | 1.56E+07 | 2.82E+07 | 7.47E+07 | 0.00E+00 | 9.17E+06 | 2.08E+07 | 0.00E+00 | 4.90E+07 | 1.63E+07 | 3.01E+07 |
| LPEr(18:2)+H | LPEr | (18:2)  | 6.18E+06 | 1.15E+07 | 4.28E+06 | 1.08E+07 | 7.82E+07 | 2.04E+07 | 1.27E+06 | 1.77E+06 | 3.01E+06 | 7.12E+07 | 2.34E+07 | 5.42E+07 |
| LPEr(18:2)+H | LPEr | (18:2)  | 4.29E+06 | 9.71E+06 | 3.22E+06 | 6.42E+06 | 1.12E+07 | 2.17E+06 | 1.22E+06 | 3.08E+06 | 1.69E+06 | 4.90E+07 | 2.28E+06 | 1.03E+07 |
| LPEr(20:1)+H | LPEr | (20:1)  | 0.00E+00 | 8.91E+04 | 2.38E+03 | 3.72E+05 | 2.13E+05 | 5.44E+05 | 0.00E+00 | 0.00E+00 | 6.22E+04 | 2.13E+05 | 1.91E+06 | 7.89E+05 |
| LPEr(20:3)+H | LPEr | (20:3)  | 1.03E+05 | 0.00E+00 | 1.32E+03 | 7.75E+05 | 1.62E+06 | 3.84E+06 | 0.00E+00 | 2.26E+03 | 2.00E+05 | 2.74E+06 | 2.61E+06 | 7.09E+06 |
| LPEr(20:4)+H | LPEr | (20:4)  | 2.45E+06 | 5.43E+06 | 1.98E+04 | 8.34E+06 | 1.98E+04 | 1.93E+07 | 4.88E+06 | 9.17E+06 | 4.28E+06 | 3.51E+07 | 2.42E+07 | 3.30E+07 |
| LPEr(22:4)+H | LPEr | (22:4)  | 0.00E+00 | 0.00E+00 | 0.00E+00 | 1.85E+05 | 8.87E+06 | 1.81E+06 | 4.03E+04 | 3.48E+02 | 9.94E+04 | 7.61E+06 | 6.71E+06 | 4.91E+06 |
| LPEr(22:4)+H | LPEr | (22:4)  | 4.56E+04 | 2.49E+03 | 5.22E+04 | 2.73E+06 | 1.20E+07 | 6.68E+06 | 9.83E+05 | 3.59E+05 | 3.30E+06 | 7.69E+06 | 6.24E+05 | 5.28E+06 |
| LPEr(22:5)+H | LPEr | (22:5)  | 2.88E+05 | 1.17E+06 | 1.78E+05 | 5.36E+06 | 2.00E+07 | 4.78E+06 | 1.77E+06 | 2.75E+06 | 1.27E+06 | 2.24E+07 | 1.37E+07 | 3.61E+06 |
| LPEr(22:5)+H | LPEr | (22:5)  | 1.61E+05 | 5.46E+05 | 1.64E+03 | 2.11E+06 | 1.02E+06 | 5.83E+04 | 8.83E+04 | 1.54E+06 | 1.01E+05 | 1.08E+07 | 1.41E+07 | 3.23E+06 |
| LPEr(22:6)+H | LPEr | (22:6)  | 4.58E    |          |          |          |          |          |          |          |          |          |          |          |

|                     |    |         |        |          |          |          |          |          |          |          |          |          |          |          |          |
|---------------------|----|---------|--------|----------|----------|----------|----------|----------|----------|----------|----------|----------|----------|----------|----------|
| PC(16:0e/14:0)+HCOO | PC | (16:0e) | (14:0) | 1.86E+07 | 2.19E+07 | 0.00E+00 | 0.00E+00 | 3.35E+06 | 2.61E+06 | 1.41E+07 | 3.46E+06 | 5.24E+06 | 9.23E+07 | 9.25E+06 | 6.37E+06 |
| PC(30:0e)+H         | PC | (30:0e) | (14:0) | 4.81E+08 | 3.87E+08 | 4.49E+08 | 7.62E+08 | 1.93E+08 | 5.50E+08 | 4.16E+08 | 2.28E+08 | 2.78E+08 | 1.45E+09 | 5.45E+08 | 6.01E+08 |
| PC(30:0e)+H         | PC | (30:0e) | (14:0) | 1.56E+08 | 1.43E+08 | 4.05E+08 | 2.58E+07 | 2.29E+07 | 9.72E+07 | 3.85E+07 | 3.36E+06 | 1.53E+07 | 6.93E+07 | 1.46E+07 | 5.99E+07 |
| PC(16:0e/14:0)+HCOO | PC | (16:0e) | (14:0) | 2.38E+06 | 2.36E+06 | 3.76E+06 | 3.34E+06 | 2.06E+06 | 4.04E+06 | 6.31E+06 | 2.06E+05 | 6.15E+05 | 3.15E+05 | 3.50E+05 | 3.50E+05 |
| PC(16:1/14:0)+HCOO  | PC | (16:1)  | (14:0) | 2.55E+07 | 3.10E+07 | 2.64E+07 | 1.99E+06 | 3.17E+07 | 2.08E+07 | 4.34E+07 | 1.69E+07 | 5.11E+06 | 7.40E+06 | 4.70E+07 | 3.40E+07 |
| PC(30:1)+H          | PC | (16:1)  | (14:0) | 1.84E+08 | 9.15E+08 | 3.12E+08 | 3.18E+08 | 0.00E+00 | 6.38E+08 | 1.59E+08 | 2.86E+08 | 2.10E+08 | 2.10E+08 | 1.21E+09 | 9.34E+08 |
| PC(16:1/14:0)+HCOO  | PC | (16:1)  | (14:0) | 2.08E+07 | 2.04E+07 | 2.64E+05 | 5.58E+07 | 1.39E+08 | 0.00E+00 | 8.00E+06 | 1.64E+07 | 8.33E+06 | 3.97E+07 | 5.26E+07 | 8.84E+07 |
| PC(30:1)+H          | PC | (30:1)  | (14:0) | 7.96E+05 | 1.79E+08 | 5.65E+05 | 1.26E+07 | 1.59E+04 | 1.40E+06 | 0.00E+00 | 6.29E+03 | 6.43E+05 | 8.41E+05 | 0.00E+00 | 0.00E+00 |
| PC(30:1e)+H         | PC | (30:1e) | (14:0) | 1.40E+08 | 6.24E+07 | 7.76E+07 | 2.91E+08 | 6.01E+07 | 3.51E+08 | 2.54E+07 | 4.13E+07 | 7.41E+07 | 3.66E+08 | 5.75E+07 | 9.50E+07 |
| PC(30:2)+H          | PC | (30:2)  | (14:0) | 0.00E+00 | 0.00E+00 | 2.14E+06 | 6.57E+06 | 1.17E+07 | 3.71E+06 | 0.00E+00 | 1.71E+06 | 1.65E+06 | 4.08E+07 | 5.05E+06 | 1.77E+07 |
| PC(30:2)+H          | PC | (30:2)  | (14:0) | 1.76E+06 | 5.00E+06 | 1.40E+06 | 1.84E+06 | 3.81E+06 | 8.57E+06 | 7.31E+05 | 9.98E+05 | 1.50E+06 | 5.28E+06 | 6.80E+07 | 1.04E+07 |
| PC(30:2)+H          | PC | (30:2)  | (14:0) | 2.28E+05 | 1.88E+06 | 5.31E+03 | 3.84E+05 | 0.00E+00 | 0.00E+00 | 0.00E+00 | 4.57E+03 | 3.57E+05 | 5.07E+06 | 5.05E+05 | 2.53E+04 |
| PC(31:0)+H          | PC | (31:0)  | (14:0) | 2.68E+07 | 0.00E+00 | 1.31E+09 | 2.28E+06 | 4.96E+08 | 2.10E+06 | 0.00E+00 | 1.67E+09 | 1.66E+09 | 1.07E+09 | 1.38E+09 | 1.26E+06 |
| PC(31:0)+H          | PC | (31:0)  | (14:0) | 1.85E+09 | 1.97E+09 | 1.74E+09 | 8.55E+08 | 3.81E+09 | 5.69E+08 | 1.84E+09 | 1.43E+09 | 5.00E+09 | 4.68E+08 | 1.31E+09 | 6.73E+07 |
| PC(31:0)+H          | PC | (31:0)  | (14:0) | 1.88E+07 | 3.03E+07 | 3.25E+06 | 1.38E+07 | 1.35E+06 | 3.04E+06 | 5.31E+06 | 0.00E+00 | 9.74E+05 | 0.00E+00 | 0.00E+00 | 0.00E+00 |
| PC(31:0)+H          | PC | (31:0)  | (14:0) | 2.48E+06 | 1.34E+06 | 1.28E+06 | 6.85E+06 | 3.05E+06 | 4.32E+06 | 1.72E+06 | 5.86E+06 | 8.25E+05 | 2.34E+06 | 2.62E+06 | 1.97E+06 |
| PC(31:0e)+H         | PC | (31:0e) | (14:0) | 1.84E+08 | 1.06E+07 | 1.12E+08 | 3.37E+07 | 6.31E+07 | 4.30E+07 | 2.23E+07 | 4.55E+07 | 6.50E+07 | 1.50E+07 | 5.01E+07 | 3.58E+07 |
| PC(18:1/13:0)+H     | PC | (18:1)  | (13:0) | 0.00E+00 | 0.00E+00 | 4.71E+08 | 1.92E+08 | 0.00E+00 | 1.98E+07 | 0.00E+00 | 1.28E+08 | 1.32E+08 | 3.23E+08 | 8.43E+08 | 2.98E+07 |
| PC(31:1)+H          | PC | (31:1)  | (13:0) | 4.06E+08 | 3.21E+08 | 4.74E+08 | 1.52E+08 | 2.81E+08 | 2.15E+08 | 9.80E+07 | 1.18E+08 | 1.32E+08 | 3.77E+07 | 3.62E+08 | 2.95E+08 |
| PC(16:0/15:1)+H     | PC | (16:0)  | (15:1) | 2.12E+09 | 1.89E+09 | 1.87E+09 | 1.20E+09 | 7.23E+08 | 2.12E+09 | 1.08E+09 | 6.01E+08 | 1.33E+09 | 1.66E+09 | 0.00E+00 | 3.07E+09 |
| PC(18:1/13:0)+H     | PC | (18:1)  | (13:0) | 6.15E+05 | 4.65E+06 | 1.41E+06 | 2.64E+07 | 0.00E+00 | 2.93E+07 | 8.96E+05 | 0.00E+00 | 6.85E+06 | 3.75E+07 | 6.49E+07 | 1.02E+08 |
| PC(16:0/15:1)+H     | PC | (16:0)  | (15:1) | 4.65E+05 | 3.78E+06 | 2.72E+06 | 2.62E+06 | 0.00E+00 | 1.98E+06 | 5.67E+05 | 1.50E+06 | 1.95E+06 | 1.79E+06 | 0.00E+00 | 6.13E+06 |
| PC(31:1e)+H         | PC | (31:1e) | (14:0) | 1.06E+07 | 1.42E+04 | 1.02E+07 | 0.00E+00 | 0.00E+00 | 1.86E+06 | 0.00E+00 | 2.47E+05 | 9.00E+06 | 3.72E+05 | 0.00E+00 | 0.00E+00 |
| PC(31:1e)+H         | PC | (31:1e) | (14:0) | 1.40E+08 | 1.72E+08 | 1.82E+08 | 1.82E+07 | 3.02E+07 | 4.54E+07 | 0.00E+00 | 5.65E+07 | 9.65E+07 | 1.09E+08 | 1.76E+08 | 7.81E+07 |
| PC(31:1p)+H         | PC | (31:1p) | (14:0) | 8.64E+09 | 5.43E+09 | 9.65E+09 | 4.34E+09 | 3.27E+09 | 3.27E+09 | 3.34E+09 | 3.46E+09 | 3.99E+09 | 6.87E+09 | 6.88E+09 | 7.48E+09 |
| PC(31:1p)+H         | PC | (31:1p) | (14:0) | 0.00E+00 | 1.33E+07 | 0.00E+00 | 1.09E+07 | 0.00E+00 | 0.00E+00 | 3.11E+07 | 1.00E+07 | 4.53E+06 | 0.00E+00 | 0.00E+00 | 0.00E+00 |
| PC(16:1/15:1)+H     | PC | (16:1)  | (15:1) | 1.06E+09 | 1.20E+09 | 8.84E+08 | 2.26E+09 | 1.54E+09 | 1.84E+09 | 5.78E+08 | 6.99E+08 | 2.18E+09 | 2.77E+09 | 2.52E+09 | 2.52E+09 |
| PC(31:2)+H          | PC | (31:2)  | (14:0) | 0.00E+00 | 1.20E+09 | 8.76E+08 | 2.27E+09 | 1.47E+09 | 4.95E+08 | 1.91E+08 | 0.00E+00 | 6.39E+08 | 2.06E+09 | 2.71E+09 | 4.93E+08 |
| PC(31:3)+H          | PC | (31:3)  | (14:0) | 2.29E+07 | 1.71E+07 | 1.04E+08 | 1.58E+08 | 2.86E+08 | 1.25E+07 | 3.07E+07 | 3.70E+07 | 3.06E+07 | 2.30E+07 | 3.95E+07 | 3.95E+07 |
| PC(16:0/16:0)+HCOO  | PC | (16:0)  | (16:0) | 4.21E+09 | 3.21E+09 | 3.04E+09 | 3.64E+09 | 4.42E+09 | 4.27E+09 | 4.95E+09 | 4.78E+09 | 4.29E+09 | 3.41E+09 | 3.82E+09 | 0.00E+00 |
| PC(32:0)+H          | PC | (16:0)  | (16:0) | 2.62E+10 | 2.04E+10 | 1.93E+10 | 2.41E+10 | 2.81E+10 | 2.86E+10 | 3.36E+10 | 3.18E+10 | 2.92E+10 | 1.94E+10 | 3.89E+10 | 3.60E+10 |
| PC(32:0)+H          | PC | (32:0)  | (16:0) | 2.62E+10 | 2.05E+10 | 1.91E+10 | 2.41E+10 | 2.75E+10 | 2.78E+10 | 3.30E+10 | 2.92E+10 | 2.94E+10 | 5.62E+10 | 0.00E+00 | 0.00E+00 |
| PC(32:0)+H          | PC | (32:0)  | (16:0) | 0.00E+00 | 0.00E+00 | 7.33E+07 | 3.64E+07 | 0.00E+00 | 0.00E+00 | 0.00E+00 | 3.39E+08 | 0.00E+00 | 6.03E+07 | 0.00E+00 | 0.00E+00 |
| PC(32:0)+H          | PC | (32:0)  | (16:0) | 2.93E+07 | 1.49E+07 | 1.11E+07 | 0.00E+00 | 1.81E+07 | 8.14E+06 | 1.05E+07 | 1.45E+07 | 1.82E+07 | 8.24E+06 | 0.00E+00 | 8.01E+06 |
| PC(16:0/16:0)+HCOO  | PC | (16:0)  | (16:0) | 1.21E+06 | 1.20E+06 | 2.71E+05 | 1.11E+06 | 0.00E+00 | 6.69E+05 | 2.59E+06 | 0.00E+00 | 4.03E+06 | 4.63E+06 | 7.55E+06 | 8.21E+05 |
| PC(32:0)+H          | PC | (16:0)  | (16:0) | 4.51E+07 | 4.09E+06 | 1.99E+07 | 3.90E+06 | 7.51E+06 | 0.00E+00 | 2.39E+07 | 9.70E+06 | 1.04E+07 | 0.00E+00 | 1.85E+07 | 0.00E+00 |
| PC(16:0/16:0)+HCOO  | PC | (16:0)  | (16:0) | 9.34E+05 | 2.20E+06 | 1.08E+06 | 6.39E+05 | 0.00E+00 | 1.58E+06 | 2.85E+06 | 1.60E+06 | 1.00E+06 | 3.41E+06 | 1.83E+06 | 2.83E+06 |
| PC(32:0)+H          | PC | (16:0)  | (16:0) | 1.91E+07 | 4.07E+06 | 1.04E+07 | 0.00E+00 | 0.00E+00 | 0.00E+00 | 1.28E+07 | 0.00E+00 | 0.00E+00 | 0.00E+00 | 0.00E+00 | 0.00E+00 |
| PC(16:0/16:0)+HCOO  | PC | (16:0)  | (16:0) | 1.20E+06 | 1.64E+05 | 2.07E+05 | 2.06E+06 | 0.00E+00 | 1.38E+06 | 3.14E+06 | 1.02E+06 | 1.26E+05 | 1.26E+05 | 2.82E+06 | 8.62E+05 |
| PC(32:0)+H          | PC | (16:0)  | (16:0) | 1.27E+07 | 1.78E+06 | 1.78E+07 | 0.00E+00 | 0.00E+00 | 0.00E+00 | 6.85E+06 | 0.00E+00 | 1.72E+06 | 1.52E+06 | 1.00E+00 | 0.00E+00 |
| PC(16:0/16:0)+HCOO  | PC | (16:0)  | (16:0) | 2.83E+06 | 1.82E+06 | 2.80E+06 | 5.46E+05 | 4.14E+06 | 1.07E+06 | 4.75E+06 | 1.53E+06 | 1.07E+06 | 1.52E+06 | 1.42E+06 | 1.68E+06 |
| PC(32:0)+H          | PC | (16:0)  | (16:0) | 4.51E+07 | 1.47E+07 | 3.22E+07 | 3.90E+06 | 7.51E+06 | 0.00E+00 | 2.39E+07 | 9.70E+06 | 1.04E+07 | 0.00E+00 | 1.85E+07 | 0.00E+00 |
| PC(32:0)+H          | PC | (32:0)  | (16:0) | 3.01E+06 | 8.29E+06 | 8.21E+05 | 1.41E+06 | 6.65E+06 | 8.42E+06 | 2.59E+07 | 1.35E+07 | 5.12E+06 | 1.27E+07 | 8.07E+06 | 1.74E+07 |
| PC(32:0)+H          | PC | (32:0)  | (16:0) | 2.75E+06 | 1.37E+06 | 9.25E+05 | 1.22E+06 | 4.92E+06 | 1.67E+06 | 1.08E+07 | 1.08E+06 | 1.85E+06 | 5.95E+06 | 1.75E+06 | 3.49E+05 |
| PC(32:0)+H          | PC | (32:0)  | (16:0) | 2.81E+05 | 3.38E+05 | 3.77E+05 | 1.24E+05 | 0.00E+00 | 9.47E+02 | 1.71E+06 | 5.11E+05 | 9.18E+05 | 9.20E+04 | 4.84E+05 | 3.83E+05 |
| PC(16:0e/16:0)+HCOO | PC | (16:0e) | (16:0) | 9.03E+08 | 6.79E+08 | 4.70E+08 | 5.56E+08 | 4.68E+08 | 7.49E+08 | 5.58E+08 | 3.57E+08 | 4.26E+08 | 8.16E+08 | 8.07E+08 | 7.12E+08 |
| PC(32:0e)+H         | PC | (16:0e) | (16:0) | 7.31E+09 | 5.32E+09 | 4.17E+09 | 4.50E+09 | 3.47E+09 | 5.99E+09 | 4.60E+09 | 2.98E+09 | 3.74E+09 | 7.17E+09 | 6.72E+09 | 6.69E+09 |
| PC(16:0e/16:0)+HCOO | PC | (16:0e) | (16:0) | 1.52E+09 | 1.12E+09 | 1.69E+09 | 1.36E+09 | 1.71E+09 | 1.30E+09 | 1.13E+09 | 1.10E+09 | 1.04E+09 | 2.71E+09 | 4.39E+09 | 6.75E+09 |
| PC(32:0e)+H         | PC | (16:0e) | (16:0) | 2.67E+07 | 1.38E+07 | 8.76E+06 | 0.00E+00 | 4.90E+06 | 0.00E+00 | 1.11E+07 | 0.00E+00 | 3.27E+07 | 0.00E+00 | 5.44E+06 | 3.45E+06 |
| PC(32:0e)+H         | PC | (32:0e) | (16:0) | 2.23E+07 | 3.43E+06 | 0.00E+00 | 0.00E+00 | 0.00E+00 | 3.21E+06 | 1.02E+07 | 0.00E+00 | 0.00E+00 | 0.00E+00 | 0.00E+00 | 0.00E+00 |
| PC(32:0e)+H         | PC | (32:0e) | (16:0) | 3.44E+07 | 8.13E+06 | 5.46E+06 | 0.00E+00 | 1.01E+07 | 0.00E+00 | 1.86E+06 | 0.00E+00 | 0.00E+00 | 0.00E+00 | 0.00E+00 | 0.00E+00 |
| PC(32:0e)+H         | PC | (32:0e) | (16:0) | 3.66E+07 | 1.12E+06 | 1.36E+06 | 4.05E+05 | 1.06E+06 | 1.01E+06 | 7.03E+05 | 2.60E+06 | 7.92E+05 | 1.14E+06 | 1.21E+06 | 1.22E+06 |
| PC(16:0p/16:0)+HCOO | PC | (16:0p) | (16:0) | 1.12E+08 | 8.80E+07 | 8.68E+07 | 9.31E+07 | 1.98E+07 | 1.78E+08 | 5.02E+07 | 2.13E+07 | 1.31E+07 | 5.02E+07 | 6.07E+07 | 4.00E+07 |
| PC(16:0p/16:0)+HCOO | PC | (16:0p) | (16:0) | 4.19E+08 | 3.02E+08 | 3.29E+08 | 2.12E+08 | 0.00E+00 | 3.72E+08 | 9.32E+07 | 4.28E+07 | 5.51E+08 | 4.17E+08 | 1.88E+08 | 1.88E+08 |
| PC(16:0/16:1)+HCOO  | PC | (16:0)  | (16:1) | 1.69E+09 | 1.53E+09 | 1.52E+09 | 1.13E+09 | 9.59E+08 | 1.80E+09 | 1.20E+09 | 1.07E+09 | 1.13E+09 | 1.66E+09 | 2.64E+09 | 2.04E+09 |
| PC(32:1)+H          | PC | (16:0)  | (16:1) | 1.29E+10 | 1.21E+10 | 1.18E+10 | 9.55E+09 | 7.97E+09 | 1.34E+10 | 1.01E+10 | 8.86E+09 | 8.07E+09 | 1.22E+10 | 1.11E+10 | 8.88E+09 |
| PC(16:0/16:1)+HCOO  | PC | (16:0)  | (16:1) | 0.00E+00 | 0.00E+00 | 0.00E+00 | 6.38E+07 | 6.24E+07 | 0.00E+00 | 0.00E+00 | 0.00E+00 | 0.00E+00 | 0.00E+00 | 0.00E+00 | 8.84E+07 |
| PC(32:1)+H          | PC | (32:1)  | (16:1) | 0.00E+00 | 2.74E+06 | 1.45E+06 | 1.35E+05 | 2.63E+05 | 2.35E+05 | 1.79E+06 | 1.87E+06 | 1.87E+06 | 4.70E+05 | 8.07E+05 | 1.08E+06 |
| PC(16:0e/16:1)+HCOO | PC | (16:0e) | (16:1) | 1.16E+08 | 8.80E+07 | 8.69E+07 | 5.67E+07 | 1.98E+07 | 1.08E+08 | 3.26E+07 | 2.13E+07 | 1.27E+07 | 1.47E+08 | 6.07E+07 | 4.00E+07 |
| PC(32:1e)+H         | PC | (16:0e) | (16:1) | 1.48E+09 | 7.70E+08 | 1.19E+09 | 1.29E+09 | 7.48E+08 | 2.77E+09 | 6.57E+08 | 5.08E+08 | 5.32E+08 | 1.31E+09 | 1.56E+09 | 2.01E+09 |
| PC(16:0e/16:1)+HCOO | PC | (16:0e) | (16:1) | 9.86E+05 | 9.81E+05 | 3.90E+05 | 2.00E+05 | 4.37E+07 | 0.00E+00 | 4.32E+07 | 4.29E+07 | 4.29E+07 | 0.00E+00 | 5.18E+07 | 5.18E+07 |
| PC(32:1e)+H         | PC | (16:0e) | (16:1) | 3.18E+09 | 1.19E+09 | 2.65E+09 | 2.75E+09 |          |          |          |          |          |          |          |          |

|                     |    |          |        |          |          |          |          |          |          |          |          |          |          |          |          |
|---------------------|----|----------|--------|----------|----------|----------|----------|----------|----------|----------|----------|----------|----------|----------|----------|
| PC(16:0p/18:1)+HCOO | PC | (16:0p)  | (18:1) | 4.92E+08 | 3.13E+08 | 5.07E+08 | 4.13E+08 | 1.59E+08 | 4.08E+08 | 1.91E+08 | 3.39E+06 | 2.10E+08 | 3.96E+08 | 3.49E+08 | 4.66E+08 |
| PC(16:0p/18:1)+H    | PC | (16:0p)  | (18:1) | 2.97E+08 | 1.80E+08 | 3.28E+08 | 9.98E+07 | 6.32E+07 | 1.59E+08 | 7.43E+07 | 1.06E+08 | 1.64E+08 | 2.20E+08 | 2.18E+08 | 1.41E+08 |
| PC(16:1/18:1)+HCOO  | PC | (16:1)   | (18:1) | 6.87E+09 | 5.40E+09 | 5.88E+09 | 5.27E+09 | 5.25E+09 | 6.14E+09 | 3.43E+09 | 3.93E+09 | 4.14E+09 | 6.41E+09 | 8.79E+09 | 8.92E+09 |
| PC(16:1/18:1)+H     | PC | (16:1)   | (18:1) | 4.21E+10 | 4.24E+10 | 4.54E+10 | 4.26E+10 | 4.45E+10 | 4.39E+10 | 3.39E+10 | 4.25E+10 | 3.79E+10 | 5.10E+10 | 6.37E+10 | 6.37E+10 |
| PC(3:2)+H           | PC | (3:2)    |        | 5.21E+10 | 4.28E+10 | 0.00E+00 | 0.00E+00 | 0.00E+00 | 0.00E+00 | 2.80E+10 | 0.00E+00 | 0.00E+00 | 0.00E+00 | 0.00E+00 | 0.00E+00 |
| PC(16:1/18:1)+H     | PC | (16:1)   | (18:1) | 4.12E+07 | 8.97E+06 | 8.67E+06 | 0.00E+00 | 7.25E+04 | 2.17E+06 | 7.04E+05 | 0.00E+00 | 0.00E+00 | 0.00E+00 | 0.00E+00 | 2.31E+06 |
| PC(16:0/18:2)+HCOO  | PC | (16:0)   | (18:2) | 4.13E+05 | 1.85E+06 | 1.28E+06 | 4.40E+05 | 3.43E+06 | 5.53E+05 | 4.56E+05 | 3.19E+05 | 7.34E+05 | 3.51E+05 | 9.84E+05 | 5.05E+05 |
| PC(3:2)+H           | PC | (16:0)   | (18:2) | 1.43E+07 | 1.29E+07 | 5.61E+06 | 1.43E+06 | 8.08E+06 | 2.54E+06 | 1.38E+07 | 7.35E+06 | 9.22E+06 | 1.82E+06 | 1.43E+07 | 1.30E+07 |
| PC(16:0e/18:2)+HCOO | PC | (16:0e)  | (18:2) | 2.93E+08 | 2.15E+04 | 1.79E+08 | 1.85E+08 | 1.29E+08 | 3.21E+08 | 1.03E+08 | 6.21E+07 | 1.13E+08 | 2.66E+08 | 2.37E+06 | 2.23E+08 |
| PC(16:0e/18:2)+H    | PC | (16:0e)  | (18:2) | 2.30E+09 | 1.83E+09 | 1.44E+09 | 1.61E+09 | 1.11E+09 | 2.87E+09 | 3.38E+08 | 3.48E+08 | 9.76E+08 | 9.38E+08 | 1.26E+09 | 2.20E+09 |
| PC(16:0e/18:2)+HCOO | PC | (16:0e)  | (18:2) | 1.89E+08 | 3.07E+08 | 5.81E+08 | 4.11E+08 | 1.60E+08 | 4.08E+08 | 1.90E+08 | 1.71E+08 | 2.11E+08 | 3.97E+08 | 4.83E+08 | 4.83E+08 |
| PC(3:2e)+H          | PC | (16:0e)  | (18:2) | 4.47E+09 | 2.69E+09 | 4.85E+09 | 3.66E+09 | 1.38E+09 | 3.38E+09 | 1.68E+09 | 1.84E+09 | 1.77E+09 | 4.14E+09 | 2.77E+09 | 3.64E+09 |
| PC(16:0p/18:2)+HCOO | PC | (16:0p)  | (18:2) | 1.59E+08 | 8.95E+07 | 1.62E+08 | 3.30E+07 | 4.84E+07 | 9.98E+06 | 5.15E+07 | 9.93E+06 | 4.11E+07 | 1.01E+08 | 7.22E+07 | 9.30E+07 |
| PC(3:2p)+H          | PC | (16:0p)  | (18:2) | 1.30E+09 | 9.39E+08 | 1.75E+09 | 1.10E+09 | 7.56E+08 | 1.57E+09 | 8.76E+08 | 4.86E+08 | 8.69E+08 | 1.60E+09 | 1.06E+09 | 1.12E+09 |
| PC(16:1/18:2)+HCOO  | PC | (16:1)   | (18:2) | 4.76E+08 | 3.68E+08 | 3.88E+08 | 2.58E+08 | 1.58E+08 | 4.99E+08 | 1.42E+08 | 1.06E+08 | 2.46E+08 | 2.59E+08 | 4.18E+08 | 0.00E+00 |
| PC(3:3)+H           | PC | (16:1)   | (18:2) | 2.76E+09 | 3.76E+09 | 2.13E+09 | 2.75E+09 | 3.17E+09 | 6.59E+09 | 1.48E+09 | 1.28E+09 | 9.71E+08 | 3.94E+09 | 7.34E+09 | 6.77E+09 |
| PC(16:1/18:2)+HCOO  | PC | (16:1)   | (18:2) | 4.62E+08 | 3.65E+08 | 3.83E+08 | 1.13E+08 | 1.71E+08 | 2.67E+08 | 6.85E+07 | 1.67E+08 | 1.10E+09 | 7.96E+08 | 7.96E+08 | 0.00E+00 |
| PC(3:3e)+H          | PC | (16:1)   | (18:2) | 4.29E+09 | 3.72E+09 | 2.30E+09 | 1.77E+09 | 1.04E+09 | 6.16E+09 | 1.66E+09 | 1.69E+09 | 9.39E+08 | 2.37E+09 | 2.89E+09 | 3.64E+09 |
| PC(16:0/18:3)+H     | PC | (16:0)   | (18:3) | 6.23E+07 | 3.43E+07 | 5.21E+07 | 3.42E+07 | 4.09E+07 | 2.02E+07 | 2.76E+08 | 2.68E+07 | 6.92E+07 | 4.75E+07 | 3.72E+07 | 2.05E+07 |
| PC(3:3)+H           | PC | (3:3)    |        | 4.32E+07 | 2.25E+07 | 5.41E+07 | 3.89E+07 | 3.23E+07 | 1.81E+07 | 9.45E+07 | 7.87E+07 | 1.48E+07 | 1.48E+07 | 1.06E+07 | 4.46E+07 |
| PC(3:3p)+H          | PC | (3:3p)   |        | 1.41E+07 | 3.35E+06 | 4.57E+06 | 2.57E+07 | 5.28E+07 | 9.35E+06 | 1.41E+07 | 9.36E+07 | 3.35E+07 | 5.62E+07 | 2.02E+07 | 1.25E+07 |
| PC(14:0p/20:3)+H    | PC | (14:0p)  | (20:3) | 3.99E+06 | 2.40E+06 | 7.56E+06 | 1.03E+07 | 4.20E+06 | 7.72E+06 | 1.62E+06 | 4.57E+06 | 2.57E+06 | 3.20E+06 | 2.13E+06 | 3.13E+06 |
| PC(3:4)+CH3COO      | PC | (3:4)    |        | 0.00E+00 | 0.00E+00 | 0.17E+05 | 7.97E+05 | 2.48E+06 | 2.10E+06 | 2.00E+05 | 1.54E+06 | 1.46E+06 | 3.48E+06 | 7.84E+06 | 3.48E+06 |
| PC(16:2/18:2)+H     | PC | (16:2)   | (18:2) | 3.12E+03 | 1.35E+07 | 1.09E+07 | 2.75E+07 | 7.04E+06 | 3.10E+07 | 3.67E+05 | 9.75E+06 | 0.00E+00 | 6.55E+07 | 6.68E+07 | 6.57E+07 |
| PC(16:0/20:4)+HCOO  | PC | (14:0)   | (20:4) | 5.58E+07 | 6.46E+07 | 2.56E+07 | 2.58E+07 | 5.73E+07 | 6.28E+07 | 3.25E+07 | 4.15E+07 | 3.34E+07 | 8.06E+07 | 1.07E+08 | 1.18E+08 |
| PC(3:4)+H           | PC | (14:0)   | (20:4) | 2.93E+08 | 2.54E+08 | 1.96E+08 | 1.41E+08 | 2.95E+08 | 3.90E+08 | 2.58E+08 | 2.59E+08 | 3.44E+08 | 4.62E+08 | 7.85E+08 | 6.11E+08 |
| PC(3:4e)+H          | PC | (3:4)    |        | 3.86E+07 | 2.61E+08 | 9.32E+07 | 1.69E+07 | 1.34E+07 | 3.10E+07 | 8.48E+07 | 1.11E+08 | 1.76E+07 | 1.80E+07 | 1.33E+07 | 1.00E+07 |
| PC(3:4e)+H          | PC | (3:4e)   |        | 1.79E+07 | 1.65E+07 | 6.03E+06 | 1.25E+07 | 7.28E+06 | 2.15E+06 | 1.12E+08 | 1.27E+07 | 1.46E+07 | 1.96E+06 | 5.65E+06 | 1.75E+06 |
| PC(3:4e)+HCOO       | PC | (3:4e)   |        | 0.00E+00 | 0.00E+00 | 0.22E+05 | 5.46E+05 | 3.46E+05 | 2.08E+05 | 8.57E+05 | 4.39E+05 | 1.89E+05 | 3.56E+05 | 8.09E+05 | 8.09E+05 |
| PC(3:4p)+H          | PC | (3:4p)   |        | 7.51E+05 | 0.00E+00 | 0.82E+06 | 4.31E+06 | 0.00E+00 | 2.64E+06 | 3.29E+07 | 7.30E+07 | 1.28E+06 | 0.00E+00 | 3.29E+06 | 1.00E+07 |
| PC(3:4p)+H          | PC | (3:4p)   |        | 5.76E+06 | 4.00E+06 | 3.85E+07 | 6.15E+07 | 1.99E+07 | 1.64E+07 | 2.49E+07 | 5.04E+07 | 1.30E+07 | 3.01E+07 | 0.00E+00 | 4.61E+06 |
| PC(3:45)+H          | PC | (3:45)   |        | 1.86E+07 | 0.00E+00 | 2.64E+07 | 2.72E+06 | 2.47E+06 | 7.19E+06 | 0.00E+00 | 3.74E+06 | 1.63E+07 | 5.72E+06 | 3.47E+07 | 1.38E+07 |
| PC(3:45)+H          | PC | (3:45)   |        | 7.45E+06 | 1.15E+07 | 3.28E+06 | 0.00E+00 | 0.00E+00 | 3.24E+05 | 0.00E+00 | 2.26E+06 | 4.46E+05 | 5.51E+05 | 3.59E+06 | 3.39E+06 |
| PC(3:45)+H          | PC | (3:45)   |        | 1.03E+08 | 2.16E+08 | 1.71E+08 | 1.77E+07 | 7.18E+07 | 3.64E+07 | 4.93E+07 | 5.75E+07 | 6.83E+07 | 1.08E+08 | 5.97E+07 | 2.72E+07 |
| PC(3:45)+H          | PC | (3:45)   |        | 1.04E+08 | 1.95E+08 | 0.00E+00 | 2.07E+07 | 1.31E+07 | 4.63E+07 | 5.98E+07 | 5.98E+07 | 4.19E+07 | 8.88E+07 | 9.79E+07 | 9.79E+07 |
| PC(3:5)+H           | PC | (3:5)    |        | 2.25E+06 | 1.80E+07 | 5.60E+07 | 1.12E+07 | 5.21E+06 | 1.11E+07 | 2.33E+07 | 1.29E+07 | 1.30E+07 | 1.50E+09 | 5.73E+07 | 1.66E+07 |
| PC(17:0/18:1)+HCOO  | PC | (17:0)   | (18:1) | 1.12E+08 | 1.05E+08 | 1.92E+08 | 1.81E+08 | 1.12E+08 | 6.33E+07 | 9.66E+07 | 8.53E+07 | 9.78E+07 | 1.46E+08 | 8.64E+07 | 6.32E+07 |
| PC(3:5)+H           | PC | (17:0)   | (18:1) | 1.63E+09 | 1.08E+09 | 1.67E+09 | 1.40E+09 | 1.23E+09 | 8.65E+08 | 8.40E+08 | 1.14E+09 | 1.13E+09 | 1.31E+09 | 1.24E+09 | 1.13E+09 |
| PC(3:5)+H           | PC | (3:5:1)  |        | 2.23E+08 | 2.10E+08 | 6.38E+07 | 3.60E+07 | 4.27E+07 | 1.89E+07 | 6.45E+07 | 1.01E+08 | 1.23E+08 | 4.52E+07 | 4.02E+07 | 2.23E+07 |
| PC(3:5p)+H          | PC | (3:5:1p) |        | 7.47E+07 | 4.55E+07 | 6.89E+07 | 5.88E+06 | 1.72E+07 | 1.89E+06 | 1.43E+07 | 2.36E+07 | 5.59E+07 | 3.25E+07 | 5.15E+06 | 2.34E+06 |
| PC(17:0/18:2)+HCOO  | PC | (17:0)   | (18:2) | 3.50E+07 | 6.50E+07 | 1.31E+08 | 1.58E+07 | 1.07E+08 | 2.19E+06 | 2.99E+07 | 1.12E+07 | 2.65E+07 | 1.66E+07 | 7.74E+06 | 2.46E+07 |
| PC(3:5)+H           | PC | (17:0)   | (18:2) | 1.61E+09 | 1.29E+09 | 1.73E+09 | 2.29E+09 | 1.62E+09 | 1.34E+09 | 8.52E+08 | 1.05E+09 | 1.98E+09 | 1.50E+09 | 1.23E+09 | 1.23E+09 |
| PC(17:1/18:2)+HCOO  | PC | (17:1)   | (18:2) | 2.16E+05 | 4.78E+05 | 1.65E+07 | 1.21E+07 | 1.74E+07 | 9.40E+06 | 4.77E+06 | 3.23E+06 | 2.98E+06 | 9.63E+06 | 2.53E+06 | 1.07E+07 |
| PC(3:5)+H           | PC | (17:1)   | (18:2) | 1.43E+08 | 2.98E+08 | 5.08E+08 | 2.11E+08 | 4.14E+07 | 3.62E+08 | 4.82E+07 | 1.19E+08 | 3.65E+07 | 3.39E+08 | 1.00E+09 | 3.31E+08 |
| PC(3:5)+H           | PC | (3:5:3)  |        | 2.63E+08 | 4.56E+07 | 4.31E+08 | 1.49E+07 | 1.25E+06 | 4.87E+06 | 5.47E+06 | 1.17E+07 | 1.26E+07 | 7.03E+06 | 5.80E+06 | 1.86E+06 |
| PC(3:5p)+H          | PC | (3:5:3p) |        | 7.80E+06 | 3.99E+06 | 2.07E+07 | 1.96E+06 | 3.68E+06 | 2.78E+06 | 2.52E+06 | 2.19E+06 | 6.67E+06 | 9.42E+05 | 5.26E+06 | 2.17E+04 |
| PC(3:5p)+H          | PC | (3:5:3p) |        | 7.50E+08 | 6.90E+08 | 1.70E+09 | 8.21E+08 | 5.87E+08 | 3.26E+08 | 6.92E+08 | 5.35E+08 | 1.85E+09 | 0.00E+00 | 1.14E+09 | 4.12E+08 |
| PC(15:0/20:4)+HCOO  | PC | (15:0)   | (20:4) | 2.70E+07 | 0.00E+00 | 1.45E+07 | 1.45E+07 | 6.58E+06 | 1.34E+07 | 1.06E+07 | 1.24E+07 | 1.48E+07 | 2.40E+07 | 4.05E+07 | 4.05E+07 |
| PC(3:5)+H           | PC | (15:0)   | (20:4) | 1.07E+08 | 2.53E+08 | 4.21E+08 | 4.34E+08 | 1.78E+08 | 4.78E+08 | 9.59E+07 | 2.94E+08 | 1.89E+08 | 3.95E+08 | 1.23E+08 | 4.50E+08 |
| PC(15:0/20:4)+HCOO  | PC | (15:0)   | (20:4) | 9.97E+06 | 1.89E+07 | 2.37E+07 | 3.23E+07 | 1.24E+07 | 6.73E+06 | 9.75E+06 | 3.00E+07 | 0.00E+00 | 1.00E+07 | 3.77E+07 | 4.05E+07 |
| PC(15:0/20:4)+H     | PC | (15:0)   | (20:4) | 2.47E+09 | 2.77E+09 | 3.17E+09 | 3.82E+09 | 7.50E+09 | 3.17E+09 | 4.84E+09 | 6.39E+09 | 4.84E+09 | 7.18E+09 | 3.78E+09 | 4.08E+09 |
| PC(15:0/20:4)+H     | PC | (15:0)   | (20:4) | 1.18E+09 | 2.65E+09 | 3.17E+09 | 1.60E+09 | 0.00E+00 | 6.01E+09 | 4.34E+09 | 6.55E+09 | 1.33E+09 | 7.51E+09 | 2.24E+09 | 0.00E+00 |
| PC(3:5)+H           | PC | (3:5:4)  |        | 2.76E+07 | 0.00E+00 | 0.00E+00 | 4.78E+06 | 8.29E+06 | 3.88E+07 | 0.00E+00 | 0.00E+00 | 3.72E+07 | 2.09E+07 | 4.80E+07 | 1.06E+07 |
| PC(3:5)+H           | PC | (3:5:4)  |        | 4.50E+06 | 0.00E+00 | 0.00E+00 | 2.70E+06 | 0.00E+00 | 4.69E+06 | 0.00E+00 | 0.00E+00 | 4.08E+06 | 6.00E+06 | 6.00E+06 | 0.00E+00 |
| PC(3:5)+H           | PC | (3:5:4)  |        | 5.31E+05 | 0.00E+00 | 2.66E+06 | 0.00E+00 | 0.00E+00 | 0.00E+00 | 6.12E+06 | 0.00E+00 | 1.23E+06 | 0.00E+00 | 4.00E+06 | 0.00E+00 |
| PC(15:0/20:4)+H     | PC | (15:0)   | (20:4) | 1.24E+07 | 9.15E+06 | 9.85E+06 | 0.00E+00 | 2.33E+07 | 0.00E+00 | 2.52E+07 | 0.00E+00 | 0.00E+00 | 0.00E+00 | 0.00E+00 | 0.00E+00 |
| PC(3:5)+H           | PC | (3:5:4)  |        | 3.53E+06 | 1.60E+07 | 1.00E+07 | 2.19E+06 | 1.20E+07 | 0.00E+00 | 2.27E+07 | 8.69E+06 | 2.64E+07 | 5.23E+06 | 4.27E+06 | 0.00E+00 |
| PC(3:5)+H           | PC | (3:5:4)  |        | 2.57E+05 | 3.66E+06 | 1.65E+06 | 1.12E+06 | 2.38E+06 | 6.06E+05 | 1.40E+05 | 1.09E+05 | 9.56E+05 | 9.64E+05 | 1.05E+06 | 1.05E+06 |
| PC(3:5)+H           | PC | (3:5:5)  |        | 1.54E+07 | 3.94E+05 | 1.78E+07 | 1.95E+06 | 3.22E+06 | 1.16E+06 | 4.50E+05 | 6.58E+06 | 4.19E+06 | 2.84E+06 | 2.20E+06 | 1.01E+07 |
| PC(3:5)+H           | PC | (3:5:5)  |        | 2.49E+07 | 2.00E+06 | 4.47E+07 | 3.58E+06 | 7.20E+05 | 3.93E+06 | 1.09E+06 | 4.95E+06 | 1.30E+06 | 1.09E+06 | 3.21E+07 | 3.21E+07 |
| PC(15:1/20:4)+HCOO  | PC | (15:1)   | (20:4) | 0.00E+00 | 2.80E+05 | 4.55E+05 | 4.71E+05 | 3.61E+04 | 1.23E+07 | 4.74E+06 | 4.98E+06 | 2.21E+06 | 1.41E+07 | 1.03E+07 | 1.06E+07 |
| PC(15:1/20:4)+H     | PC | (15:1)   | (20:4) | 2.45E+08 | 1.20E+08 | 6.09E+08 | 0.00E+00 | 1.43E+09 | 1.67E+09 | 5.94E+08 | 9.33E+08 | 8.52E+08 | 1.34E+09 | 1.80E+09 | 1.85E+09 |
| PC(3:6)+H           | PC | (3:5:6)  |        | 0.0      |          |          |          |          |          |          |          |          |          |          |          |

|                      |    |         |        |          |          |          |          |          |          |          |          |          |          |          |
|----------------------|----|---------|--------|----------|----------|----------|----------|----------|----------|----------|----------|----------|----------|----------|
| PC(14:0/22:6)+HCOO   | PC | (14:0)  | (22:6) | 2.33E+07 | 2.21E+07 | 1.04E+07 | 1.75E+07 | 1.23E+07 | 1.10E+08 | 4.46E+06 | 7.68E+06 | 1.71E+07 | 2.35E+08 | 9.69E+07 |
| PC(36:6)+H           | PC | (14:0)  | (22:6) | 6.48E+07 | 5.60E+07 | 7.82E+07 | 4.59E+07 | 4.71E+07 | 1.79E+08 | 8.49E+07 | 8.99E+07 | 1.66E+08 | 2.86E+08 | 2.87E+08 |
| PC(14:0/22:6)+HCOO   | PC | (14:0)  | (22:6) | 3.82E+07 | 3.01E+07 | 2.31E+07 | 5.37E+06 | 7.68E+05 | 1.20E+07 | 2.70E+07 | 4.67E+07 | 4.02E+07 | 0.00E+00 | 1.32E+08 |
| PC(38:6)+H           | PC | (14:0)  | (22:6) | 8.38E+07 | 8.11E+07 | 8.20E+07 | 4.59E+07 | 4.54E+07 | 5.03E+07 | 5.03E+07 | 8.78E+07 | 2.65E+08 | 2.75E+08 | 3.06E+08 |
| PC(16:2/20:4)+CH3COO | PC | (16:2)  | (20:4) | 1.14E+08 | 5.56E+07 | 1.81E+08 | 1.09E+07 | 3.39E+07 | 2.05E+08 | 9.14E+06 | 3.41E+07 | 3.86E+07 | 1.16E+08 | 3.34E+08 |
| PC(18:0/19:0)+CH3COO | PC | (18:0)  | (19:0) | 2.63E+07 | 1.33E+07 | 4.99E+07 | 3.64E+07 | 2.10E+07 | 7.43E+06 | 1.63E+07 | 2.09E+07 | 2.60E+07 | 1.25E+07 | 0.00E+00 |
| PC(37:1)+H           | PC | (37:1)  |        | 3.31E+08 | 2.00E+08 | 3.17E+08 | 2.30E+07 | 1.09E+08 | 1.03E+08 | 1.37E+08 | 7.56E+07 | 2.85E+08 | 4.43E+07 | 8.92E+07 |
| PC(18:1/19:0)+H      | PC | (18:1)  | (19:0) | 2.88E+08 | 1.29E+08 | 1.05E+08 | 9.50E+06 | 1.52E+07 | 1.21E+07 | 4.85E+07 | 1.92E+07 | 1.89E+07 | 1.23E+07 | 8.95E+06 |
| PC(18:1/19:1)+HCOO   | PC | (18:1)  | (19:1) | 8.16E+07 | 0.00E+00 | 9.97E+04 | 0.00E+00 | 1.66E+05 | 1.63E+07 | 1.23E+05 | 1.24E+05 | 6.77E+05 | 9.98E+05 | 7.49E+06 |
| PC(37:2)+H           | PC | (18:1)  | (19:1) | 3.11E+08 | 2.17E+08 | 1.59E+08 | 0.00E+00 | 1.22E+08 | 8.52E+07 | 1.38E+08 | 1.38E+08 | 1.38E+08 | 1.38E+08 | 1.38E+08 |
| PC(19:0/18:2)+HCOO   | PC | (19:0)  | (18:2) | 3.35E+07 | 3.07E+07 | 3.97E+07 | 5.19E+07 | 4.27E+07 | 1.18E+07 | 1.49E+07 | 1.32E+07 | 8.71E+06 | 7.47E+06 | 7.01E+07 |
| PC(37:2)+H           | PC | (19:0)  | (18:2) | 1.04E+09 | 8.10E+08 | 1.19E+09 | 3.96E+08 | 2.65E+08 | 1.46E+08 | 4.59E+07 | 2.92E+08 | 2.30E+08 | 7.60E+08 | 1.40E+08 |
| PC(37:2)+H           | PC | (37:2)  |        | 1.31E+09 | 2.27E+07 | 8.24E+06 | 2.79E+06 | 2.32E+06 | 1.92E+07 | 0.00E+00 | 5.24E+07 | 0.00E+00 | 0.00E+00 | 0.00E+00 |
| PC(17:0/20:3)+HCOO   | PC | (17:0)  | (20:3) | 1.17E+06 | 3.15E+05 | 4.52E+06 | 1.40E+06 | 1.79E+06 | 2.89E+06 | 1.15E+06 | 5.12E+06 | 3.40E+06 | 3.29E+04 | 2.11E+06 |
| PC(37:3)+H           | PC | (17:0)  | (20:3) | 3.14E+08 | 2.83E+08 | 4.57E+08 | 1.83E+08 | 5.72E+07 | 1.28E+08 | 1.57E+08 | 1.50E+07 | 2.43E+08 | 1.26E+08 | 9.35E+07 |
| PC(17:0/20:3)+HCOO   | PC | (17:0)  | (20:3) | 6.94E+06 | 4.81E+06 | 2.18E+06 | 6.40E+05 | 5.62E+05 | 6.82E+05 | 1.43E+06 | 2.05E+06 | 2.16E+06 | 0.00E+00 | 1.30E+06 |
| PC(17:0/20:4)+HCOO   | PC | (17:0)  | (20:4) | 1.49E+07 | 8.74E+07 | 5.96E+07 | 6.13E+06 | 0.00E+00 | 2.14E+06 | 5.94E+06 | 2.07E+07 | 1.64E+07 | 3.77E+07 | 7.50E+06 |
| PC(37:4)+H           | PC | (17:0)  | (20:4) | 4.32E+05 | 1.95E+05 | 4.29E+03 | 9.54E+05 | 9.44E+06 | 8.09E+06 | 1.54E+03 | 6.30E+03 | 2.13E+05 | 2.13E+04 | 3.19E+06 |
| PC(37:4)+H           | PC | (17:0)  | (20:4) | 5.57E+06 | 8.01E+06 | 1.85E+07 | 3.16E+06 | 1.02E+06 | 1.39E+06 | 5.60E+06 | 1.37E+04 | 1.00E+06 | 3.90E+06 | 6.86E+06 |
| PC(17:0/20:4)+HCOO   | PC | (17:0)  | (20:4) | 7.67E+06 | 3.53E+05 | 1.52E+07 | 8.73E+06 | 5.30E+07 | 1.18E+07 | 2.61E+07 | 1.02E+08 | 1.27E+07 | 4.95E+07 | 1.98E+07 |
| PC(37:4)+H           | PC | (37:4)  |        | 1.20E+08 | 1.43E+07 | 2.43E+08 | 7.87E+08 | 9.56E+08 | 4.14E+08 | 5.13E+08 | 1.25E+09 | 1.76E+08 | 8.24E+08 | 4.44E+08 |
| PC(37:4)+H           | PC | (37:4)  |        | 3.02E+07 | 6.37E+08 | 8.21E+08 | 1.80E+09 | 2.23E+09 | 1.11E+09 | 9.80E+08 | 1.38E+09 | 1.54E+09 | 2.53E+09 | 1.77E+09 |
| PC(17:1/20:4)+HCOO   | PC | (17:1)  | (20:4) | 6.44E+06 | 3.14E+06 | 9.98E+06 | 2.92E+06 | 5.24E+06 | 2.95E+06 | 1.64E+07 | 9.45E+06 | 7.83E+06 | 1.13E+07 | 1.90E+09 |
| PC(17:1/20:4)+H      | PC | (17:1)  | (20:4) | 2.62E+07 | 8.64E+07 | 1.19E+08 | 7.20E+07 | 9.31E+07 | 1.24E+08 | 7.10E+07 | 7.63E+07 | 1.27E+08 | 7.78E+07 | 1.62E+08 |
| PC(37:5)+H           | PC | (37:5)  |        | 8.71E+07 | 3.39E+07 | 7.97E+07 | 1.26E+06 | 5.13E+06 | 3.79E+06 | 6.69E+07 | 4.20E+07 | 8.22E+06 | 6.97E+07 | 4.62E+04 |
| PC(37:5)+H           | PC | (37:5)  |        | 5.35E+08 | 0.00E+00 | 3.72E+08 | 4.70E+08 | 7.14E+08 | 4.61E+08 | 5.72E+08 | 5.78E+08 | 6.37E+08 | 8.45E+08 | 5.09E+08 |
| PC(37:6)+H           | PC | (37:6)  |        | 2.53E+08 | 6.15E+07 | 1.56E+08 | 4.24E+07 | 3.19E+07 | 2.60E+08 | 3.65E+07 | 9.18E+07 | 4.04E+07 | 1.83E+08 | 2.34E+08 |
| PC(37:6)+H           | PC | (37:6)  |        | 1.08E+08 | 4.14E+07 | 1.13E+08 | 1.23E+08 | 1.38E+08 | 1.26E+06 | 1.25E+07 | 1.73E+06 | 5.00E+06 | 3.18E+08 | 0.00E+00 |
| PC(15:0/22:6)+H      | PC | (15:0)  | (22:6) | 2.35E+09 | 1.89E+09 | 1.85E+09 | 9.12E+08 | 9.12E+08 | 2.29E+09 | 2.54E+09 | 4.28E+09 | 2.54E+09 | 2.54E+09 | 1.90E+09 |
| PC(37:6)+H           | PC | (37:6)  |        | 2.05E+09 | 1.70E+09 | 1.81E+09 | 0.00E+00 | 0.00E+00 | 0.00E+00 | 0.00E+00 | 2.59E+09 | 0.00E+00 | 2.21E+09 | 6.99E+08 |
| PC(15:1/22:6)+HCOO   | PC | (15:1)  | (22:6) | 4.19E+08 | 2.61E+08 | 3.79E+08 | 3.09E+08 | 1.07E+07 | 6.96E+08 | 2.43E+07 | 6.08E+07 | 1.52E+08 | 5.31E+08 | 8.39E+08 |
| PC(15:1/22:6)+H      | PC | (15:1)  | (22:6) | 1.34E+09 | 1.04E+09 | 9.54E+08 | 6.83E+08 | 6.72E+08 | 2.08E+09 | 4.30E+08 | 8.92E+08 | 7.95E+08 | 9.07E+08 | 1.91E+09 |
| PC(37:7)+H           | PC | (37:7)  |        | 1.34E+09 | 7.89E+08 | 9.64E+08 | 1.88E+08 | 6.75E+08 | 0.00E+00 | 5.62E+08 | 8.94E+08 | 2.77E+08 | 2.69E+08 | 6.15E+08 |
| PC(18:0/20:1)+HCOO   | PC | (18:0)  | (20:1) | 2.36E+08 | 1.98E+08 | 1.77E+08 | 5.20E+07 | 5.01E+07 | 9.90E+06 | 4.65E+07 | 7.73E+07 | 1.19E+08 | 1.57E+08 | 1.61E+08 |
| PC(18:1)+H           | PC | (18:0)  | (20:1) | 1.69E+08 | 1.43E+09 | 1.31E+09 | 6.64E+08 | 5.18E+08 | 7.80E+08 | 5.69E+08 | 5.07E+08 | 1.02E+09 | 1.75E+09 | 1.37E+09 |
| PC(20:0e/18:1)+HCOO  | PC | (20:0e) | (18:1) | 5.53E+06 | 9.65E+06 | 2.96E+07 | 4.48E+07 | 1.77E+07 | 1.78E+07 | 1.78E+07 | 2.09E+07 | 1.77E+07 | 1.78E+07 | 1.78E+07 |
| PC(20:1/18:1)+HCOO   | PC | (20:1)  | (18:1) | 1.12E+09 | 9.88E+08 | 9.49E+08 | 1.22E+08 | 5.26E+08 | 3.90E+08 | 2.23E+07 | 1.02E+08 | 2.66E+07 | 3.09E+08 | 3.13E+08 |
| PC(38:2)+H           | PC | (20:1)  | (18:1) | 8.38E+09 | 7.30E+09 | 6.89E+09 | 3.36E+09 | 2.77E+09 | 2.45E+09 | 1.56E+09 | 2.81E+09 | 2.93E+09 | 2.87E+09 | 2.18E+09 |
| PC(18:0/20:3)+HCOO   | PC | (18:0)  | (20:3) | 1.23E+09 | 1.12E+09 | 1.11E+09 | 6.74E+08 | 7.29E+08 | 8.31E+08 | 6.65E+08 | 8.35E+08 | 8.84E+08 | 9.99E+08 | 1.14E+09 |
| PC(38:3)+H           | PC | (18:0)  | (20:3) | 7.40E+09 | 7.67E+09 | 8.93E+09 | 4.99E+09 | 5.69E+09 | 3.89E+09 | 3.89E+09 | 6.23E+09 | 6.23E+09 | 5.97E+09 | 7.77E+09 |
| PC(38:3e)+H          | PC | (38:3e) |        | 2.00E+08 | 2.60E+07 | 1.58E+07 | 6.24E+07 | 1.52E+07 | 9.40E+07 | 1.37E+07 | 9.08E+06 | 2.72E+07 | 1.93E+07 | 2.04E+07 |
| PC(20:1e/18:2)+HCOO  | PC | (20:1e) | (18:2) | 2.32E+07 | 7.87E+06 | 5.03E+06 | 8.13E+06 | 8.15E+06 | 2.38E+07 | 1.98E+06 | 4.08E+06 | 8.15E+06 | 1.98E+06 | 1.98E+06 |
| PC(16:0/22:4)+HCOO   | PC | (16:0)  | (22:4) | 6.83E+08 | 5.05E+08 | 3.67E+08 | 1.49E+08 | 0.00E+00 | 2.35E+08 | 2.61E+08 | 1.11E+08 | 0.00E+00 | 2.32E+08 | 0.00E+00 |
| PC(38:4)+H           | PC | (16:0)  | (22:4) | 7.88E+08 | 2.85E+09 | 7.90E+09 | 6.28E+09 | 0.00E+00 |
| PC(18:0/20:4)+HCOO   | PC | (18:0)  | (20:4) | 1.72E+09 | 1.52E+09 | 1.79E+09 | 3.54E+09 | 4.70E+09 | 3.07E+09 | 2.00E+09 | 5.61E+09 | 3.69E+09 | 4.59E+09 | 4.40E+09 |
| PC(38:4)+H           | PC | (18:0)  | (20:4) | 1.09E+10 | 1.49E+10 | 1.06E+10 | 1.54E+10 | 3.39E+10 | 2.17E+10 | 1.54E+10 | 3.93E+10 | 2.76E+10 | 3.44E+10 | 2.90E+10 |
| PC(18:0/20:4)+HCOO   | PC | (18:0)  | (20:4) | 0.00E+00 | 3.04E+05 | 6.81E+05 | 1.02E+06 | 8.79E+05 | 2.28E+06 | 3.27E+05 | 2.47E+06 | 1.93E+05 | 2.56E+06 | 9.41E+06 |
| PC(18:0/20:4)+HCOO   | PC | (18:0)  | (20:4) | 2.86E+09 |
| PC(18:0/20:4)+HCOO   | PC | (18:0)  | (20:4) | 1.25E+06 | 1.93E+05 | 2.93E+06 | 4.69E+05 | 7.24E+06 | 1.43E+06 | 5.99E+05 | 2.47E+06 | 1.96E+05 | 6.75E+05 | 2.04E+06 |
| PC(38:4)+H           | PC | (18:0)  | (20:4) | 1.58E+07 | 9.51E+06 | 1.41E+07 | 2.93E+06 | 3.30E+06 | 0.00E+00 | 1.52E+07 | 0.00E+00 | 8.65E+06 | 0.00E+00 | 0.00E+00 |
| PC(38:4)+H           | PC | (38:4)  |        | 5.57E+06 | 4.30E+06 | 2.96E+06 | 0.00E+00 | 1.04E+07 | 1.42E+07 | 1.39E+07 | 1.42E+07 | 2.39E+07 | 1.04E+06 | 1.29E+04 |
| PC(16:0e/22:4)+HCOO  | PC | (16:0e) | (22:4) | 3.02E+06 | 1.26E+06 | 1.60E+06 | 4.12E+07 | 6.23E+07 | 5.73E+06 | 1.90E+06 | 1.10E+06 | 3.24E+07 | 8.57E+07 | 7.62E+07 |
| PC(38:4e)+H          | PC | (16:0e) | (22:4) | 5.25E+08 | 1.89E+08 | 1.43E+08 | 2.93E+08 | 5.10E+08 | 4.67E+08 | 1.46E+08 | 8.32E+07 | 9.56E+07 | 4.43E+07 | 3.15E+08 |
| PC(16:0e/22:4)+HCOO  | PC | (16:0e) | (22:4) | 1.19E+07 | 2.56E+07 | 4.80E+07 | 1.10E+07 | 1.10E+07 | 1.26E+08 | 1.36E+08 | 1.36E+08 | 1.36E+08 | 1.36E+08 | 1.36E+08 |
| PC(38:4e)+H          | PC | (16:0e) | (22:4) | 2.12E+09 | 1.00E+09 | 1.07E+09 | 1.44E+09 | 1.76E+09 | 2.34E+09 | 1.11E+09 | 1.60E+09 | 1.92E+09 | 3.39E+09 | 3.77E+09 |
| PC(18:0e/20:4)+HCOO  | PC | (18:0e) | (20:4) | 2.01E+08 | 1.06E+08 | 1.44E+07 | 1.96E+08 | 2.07E+08 | 4.22E+08 | 4.57E+07 | 2.69E+07 | 2.59E+08 | 3.03E+08 | 2.21E+08 |
| PC(18:0p/20:4)+HCOO  | PC | (18:0p) | (20:4) | 4.18E+08 | 2.01E+08 | 2.66E+08 | 4.29E+08 | 4.94E+08 | 4.86E+08 | 3.38E+08 | 2.66E+08 | 3.15E+08 | 5.39E+08 | 5.75E+08 |
| PC(38:4p)+H          | PC | (18:0p) | (20:4) | 4.54E+09 | 2.35E+09 | 0.00E+00 | 5.36E+09 | 6.27E+09 | 7.08E+09 | 3.83E+09 | 7.48E+09 | 3.31E+09 | 7.48E+09 | 6.14E+09 |
| PC(18:0p/20:4)+HCOO  | PC | (18:0p) | (20:4) | 4.06E+08 | 1.62E+08 | 2.44E+08 | 5.01E+07 | 1.20E+08 | 5.30E+07 | 2.66E+08 | 8.20E+07 | 1.62E+07 | 1.43E+08 | 7.52E+07 |
| PC(38:4p)+H          | PC | (18:0p) | (20:4) | 4.65E+09 | 2.35E+09 | 2.69E+09 | 5.26E+08 | 0.00E+00 | 0.00E+00 | 0.00E+00 | 0.00E+00 | 5.09E+08 | 2.66E+09 | 3.72E+09 |
| PC(18:1p/20:3)+HCOO  | PC | (18:1p) | (20:3) | 4.84E+07 | 4.76E+07 | 4.76E+07 | 6.79E+07 | 5.30E+07 | 5.30E+07 | 1.06E+08 | 8.49E+07 | 8.49E+07 | 8.49E+07 | 8.49E+07 |
| PC(38:4p)+H          | PC | (18:1p) | (20:3) | 1.91E+08 | 3.10E+08 | 3.09E+08 | 4.57E+08 | 2.87E+08 | 4.66E+08 | 1.94E+08 | 7.57E+08 | 1.04E+09 | 3.15E+08 | 7.72E+08 |
| PC(38:5)+H           | PC | (38:5)  |        | 6.18E+06 | 0.00E+00 | 4.12E+05 | 1.74E+06 | 0.00E+00 | 4.08E+05 | 1.86E+05 | 1.98E+04 | 0.00E+00 | 9.75E+05 | 0.00E+00 |
| PC(18:1/20:4)+HCOO   | PC | (18:1)  | (20:4) | 4.54E+07 | 0.00E+00 | 1.21E+08 | 0.00E+00 | 0.00E+00 | 1.20E+08 | 0.00E+00 | 0.00E+00 | 1.54E+08 | 0.00E+00 | 3.71E+08 |
| PC(18:1/20:4)+HCOO   | PC | (18:1)  | (20:4) | 1.60E+09 | 9.38E+08 | 9.64E+08 | 1.32E+09 | 1.57E+09 | 1.80E+09 | 1.32E+09 | 1.59E+09 | 6.59E+08 | 1.27E+09 | 2.29E+09 |
| PC(38:5)+H           | PC | (18:1)  | (20:4) | 8.83E+09 | 5.60E+09 | 7.19E+09 | 2.49E+10 | 3.97E+09 | 1.24E+10 | 1.06E+10 | 8.02     |          |          |          |

|                     |    |         |         |          |          |          |          |          |          |          |          |          |          |          |          |
|---------------------|----|---------|---------|----------|----------|----------|----------|----------|----------|----------|----------|----------|----------|----------|----------|
| PC(18:0e/22:4)+HCOO | PC | (18:0e) | (22:4)  | 5.80E+07 | 2.37E+06 | 1.55E+07 | 7.42E+06 | 1.04E+08 | 6.23E+07 | 5.24E+06 | 1.03E+07 | 1.86E+07 | 3.69E+07 | 4.58E+07 | 3.54E+07 |
| PC(18:0p/22:4)+HCOO | PC | (18:0p) | (22:4)  | 3.62E+07 | 4.57E+06 | 1.51E+07 | 4.17E+07 | 7.20E+06 | 4.47E+07 | 1.51E+07 | 1.07E+07 | 2.22E+07 | 1.98E+07 | 5.46E+07 | 1.93E+07 |
| PC(20:2/20:3)+HCOO  | PC | (20:2)  | (20:3)  | 2.23E+07 | 1.42E+07 | 1.45E+06 | 4.93E+05 | 1.94E+06 | 1.78E+06 | 0.00E+00 | 0.00E+00 | 4.53E+06 | 3.57E+06 | 7.25E+05 | 9.28E+05 |
| PC(20:2)+HCOO       | PC | (20:2)  | (20:3)  | 2.23E+07 | 1.78E+07 | 0.00E+00 | 8.17E+06 | 0.00E+00 | 0.00E+00 | 0.00E+00 | 0.00E+00 | 2.47E+09 | 0.00E+00 | 3.14E+09 | 3.00E+09 |
| PC(18:0/22:5)+HCOO  | PC | (18:0)  | (22:5)  | 5.40E+08 | 3.12E+08 | 1.85E+08 | 5.18E+07 | 8.46E+06 | 8.66E+07 | 2.31E+08 | 3.30E+08 | 3.00E+08 | 0.00E+00 | 3.89E+08 | 3.36E+08 |
| PC(40:5)+H          | PC | (18:0)  | (22:5)  | 1.67E+09 | 2.62E+09 | 2.90E+09 | 3.03E+09 | 3.42E+09 | 3.60E+08 | 3.11E+09 | 3.77E+09 | 2.47E+09 | 3.70E+09 | 4.01E+09 | 3.00E+09 |
| PC(18:0/22:5)+HCOO  | PC | (18:0)  | (22:5)  | 5.66E+08 | 2.89E+08 | 3.66E+08 | 9.59E+07 | 2.56E+08 | 7.17E+07 | 3.34E+08 | 2.62E+08 | 3.00E+08 | 2.00E+08 | 5.00E+07 | 6.93E+07 |
| PC(40:5)+H          | PC | (18:0)  | (22:5)  | 2.06E+08 | 2.54E+09 | 2.29E+09 | 1.01E+09 | 1.53E+09 | 4.96E+08 | 6.82E+09 | 0.00E+00 | 0.00E+00 | 1.91E+09 | 0.00E+00 | 6.08E+08 |
| PC(40:5e)+H         | PC | (40:5e) | (40:5e) | 4.34E+08 | 1.61E+08 | 3.31E+08 | 2.18E+08 | 8.89E+08 | 1.24E+09 | 1.45E+08 | 2.67E+08 | 5.29E+08 | 5.57E+08 | 4.92E+08 | 3.33E+08 |
| PC(40:5e)+H         | PC | (40:5e) | (40:5e) | 4.55E+08 | 1.49E+08 | 3.98E+08 | 8.77E+07 | 3.10E+08 | 6.86E+07 | 3.34E+08 | 3.41E+08 | 7.92E+07 | 2.19E+08 | 6.08E+08 | 2.97E+08 |
| PC(18:0/22:5)+HCOO  | PC | (18:0p) | (22:5)  | 2.59E+05 | 7.32E+05 | 0.00E+00 | 4.91E+06 | 1.19E+07 | 5.66E+06 | 7.06E+06 | 1.09E+07 | 5.49E+06 | 1.09E+07 | 6.51E+06 | 1.14E+06 |
| PC(20:2/20:4)+HCOO  | PC | (20:2)  | (20:4)  | 5.02E+07 | 3.44E+07 | 8.90E+07 | 1.33E+08 | 5.84E+07 | 1.55E+08 | 2.36E+08 | 2.38E+08 | 4.41E+08 | 2.07E+07 | 2.61E+07 | 1.69E+08 |
| PC(40:6)+H          | PC | (20:2)  | (20:4)  | 1.72E+09 | 4.28E+08 | 8.55E+08 | 3.81E+08 | 5.61E+08 | 8.98E+08 | 1.47E+09 | 2.40E+09 | 1.45E+09 | 5.34E+08 | 1.14E+09 | 7.68E+08 |
| PC(18:0/22:6)+HCOO  | PC | (18:0)  | (22:6)  | 1.66E+07 | 3.27E+07 | 3.38E+08 | 3.29E+08 | 4.33E+08 | 4.92E+08 | 3.20E+08 | 5.31E+08 | 7.76E+08 | 4.62E+08 | 5.88E+08 | 5.48E+08 |
| PC(40:6)+H          | PC | (18:0)  | (22:6)  | 7.73E+08 | 4.75E+08 | 3.98E+09 | 4.30E+09 | 5.46E+09 | 6.29E+09 | 4.24E+09 | 6.48E+09 | 1.14E+10 | 5.90E+09 | 6.82E+09 | 7.51E+09 |
| PC(18:0/22:6)+HCOO  | PC | (18:0)  | (22:6)  | 4.37E+08 | 2.80E+08 | 3.54E+08 | 2.12E+08 | 4.27E+08 | 4.93E+08 | 3.14E+08 | 5.68E+08 | 1.04E+09 | 4.46E+08 | 5.06E+08 | 2.22E+08 |
| PC(40:6)+H          | PC | (18:0)  | (22:6)  | 5.02E+09 | 3.65E+09 | 4.02E+09 | 1.80E+09 | 5.25E+09 | 5.86E+09 | 4.29E+09 | 6.32E+09 | 1.03E+10 | 4.44E+09 | 8.02E+09 | 4.33E+09 |
| PC(40:6e)+H         | PC | (40:6e) | (40:6e) | 5.40E+08 | 1.75E+08 | 2.66E+08 | 2.58E+08 | 5.16E+08 | 1.52E+07 | 2.93E+08 | 5.37E+08 | 1.47E+09 | 4.84E+08 | 4.68E+08 | 4.66E+08 |
| PC(40:6e)+H         | PC | (40:6e) | (40:6e) | 6.91E+06 | 7.93E+07 | 2.39E+08 | 9.77E+07 | 1.53E+08 | 4.10E+08 | 2.27E+08 | 3.87E+07 | 2.86E+08 | 5.04E+08 | 2.18E+08 | 4.05E+08 |
| PC(40:6p)+H         | PC | (40:6p) | (40:6p) | 9.17E+08 | 3.05E+08 | 4.18E+08 | 7.44E+08 | 4.64E+08 | 6.26E+08 | 6.74E+08 | 4.11E+08 | 7.52E+08 | 5.85E+08 | 1.17E+09 | 7.29E+08 |
| PC(40:6p)+H         | PC | (40:6p) | (40:6p) | 1.09E+09 | 4.17E+08 | 3.60E+08 | 7.47E+08 | 3.84E+08 | 7.08E+08 | 6.74E+08 | 3.03E+07 | 6.79E+08 | 1.75E+08 | 1.14E+09 | 0.00E+00 |
| PC(20:3/20:4)+HCOO  | PC | (20:3)  | (20:4)  | 2.16E+07 | 4.62E+07 | 1.13E+07 | 9.67E+07 | 8.00E+06 | 3.49E+07 | 1.30E+07 | 2.65E+07 | 5.31E+07 | 8.08E+07 | 1.13E+07 | 1.50E+08 |
| PC(18:1/22:6)+HCOO  | PC | (18:1)  | (22:6)  | 1.40E+06 | 4.31E+06 | 6.58E+06 | 5.19E+07 | 1.05E+08 | 5.93E+07 | 1.38E+07 | 1.58E+07 | 0.00E+00 | 0.00E+00 | 4.45E+06 | 2.24E+06 |
| PC(40:7)+H          | PC | (18:1)  | (22:6)  | 6.29E+08 | 4.11E+08 | 4.53E+08 | 2.58E+08 | 2.57E+08 | 5.64E+08 | 2.70E+08 | 3.05E+08 | 2.80E+08 | 4.08E+08 | 9.04E+08 | 8.95E+08 |
| PC(40:7)+H          | PC | (40:7)  | (40:7)  | 5.51E+09 | 4.16E+09 | 4.71E+09 | 3.15E+09 | 2.22E+09 | 6.64E+09 | 2.19E+09 | 2.27E+09 | 5.02E+09 | 5.02E+09 | 9.01E+09 | 9.39E+09 |
| PC(40:7p)+H         | PC | (40:7p) | (40:7p) | 6.74E+06 | 6.47E+06 | 5.61E+06 | 3.78E+07 | 6.07E+07 | 5.77E+07 | 8.21E+07 | 1.16E+08 | 1.72E+07 | 2.58E+07 | 9.04E+06 | 1.29E+07 |
| PC(40:7p)+H         | PC | (40:7p) | (40:7p) | 6.37E+07 | 3.77E+07 | 4.97E+07 | 2.92E+07 | 1.33E+07 | 1.37E+07 | 1.29E+07 | 2.68E+07 | 6.96E+07 | 6.15E+07 | 0.00E+00 | 0.00E+00 |
| PC(40:7p)+H         | PC | (40:7p) | (40:7p) | 1.38E+08 | 2.15E+07 | 7.72E+07 | 1.80E+08 | 2.04E+07 | 2.79E+08 | 4.63E+07 | 3.54E+07 | 2.19E+07 | 3.71E+08 | 1.45E+08 | 0.00E+00 |
| PC(40:7p)+H         | PC | (40:7p) | (40:7p) | 1.38E+07 | 1.14E+08 | 6.78E+07 | 4.07E+07 | 1.05E+08 | 5.93E+07 | 1.27E+07 | 1.27E+07 | 2.37E+07 | 7.20E+07 | 5.49E+07 | 0.00E+00 |
| PC(40:7p)+H         | PC | (40:7p) | (40:7p) | 1.06E+08 | 3.82E+07 | 0.90E+07 | 3.19E+08 | 1.31E+08 | 1.54E+08 | 1.76E+08 | 1.33E+08 | 2.19E+07 | 1.54E+08 | 9.87E+07 | 2.66E+08 |
| PC(18:2/22:6)+HCOO  | PC | (18:2)  | (22:6)  | 1.53E+08 | 9.16E+07 | 1.06E+08 | 1.00E+08 | 1.64E+08 | 1.71E+08 | 8.49E+07 | 1.46E+08 | 1.78E+08 | 1.89E+08 | 2.98E+08 | 3.02E+08 |
| PC(40:8)+H          | PC | (18:2)  | (22:6)  | 1.21E+09 | 7.42E+08 | 5.19E+08 | 1.01E+09 | 1.32E+09 | 2.04E+09 | 5.52E+08 | 1.37E+09 | 1.34E+09 | 2.21E+09 | 3.84E+09 | 4.22E+09 |
| PC(40:8)+H          | PC | (40:8)  | (40:8)  | 6.98E+07 | 0.00E+00 | 1.21E+08 | 1.90E+07 | 1.18E+08 | 2.56E+08 | 1.44E+08 | 7.02E+07 | 4.06E+07 | 0.00E+00 | 0.00E+00 | 0.00E+00 |
| PC(40:8)+H          | PC | (40:8)  | (40:8)  | 4.68E+06 | 1.25E+07 | 3.61E+06 | 1.41E+07 | 8.10E+06 | 1.18E+06 | 2.86E+07 | 1.85E+07 | 9.71E+06 | 1.94E+06 | 0.00E+00 | 2.38E+06 |
| PC(40:9)+H          | PC | (40:9)  | (40:9)  | 5.84E+06 | 4.77E+06 | 5.03E+06 | 2.40E+06 | 5.43E+06 | 1.22E+07 | 4.44E+07 | 3.03E+07 | 1.88E+07 | 3.34E+07 | 2.16E+07 | 0.00E+00 |
| PC(40:9)+H          | PC | (40:9)  | (40:9)  | 8.81E+04 | 1.46E+05 | 9.95E+04 | 2.05E+04 | 6.42E+04 | 2.84E+07 | 0.00E+00 | 1.81E+06 | 1.89E+06 | 1.92E+07 | 6.09E+07 | 1.89E+07 |
| PC(40:9)+H          | PC | (40:9)  | (40:9)  | 2.36E+08 | 2.66E+08 | 2.26E+08 | 2.14E+07 | 4.01E+08 | 3.10E+08 | 1.13E+08 | 2.25E+08 | 1.62E+08 | 3.43E+08 | 2.73E+08 | 1.83E+08 |
| PC(40:9)+H          | PC | (40:9)  | (40:9)  | 8.12E+08 | 6.52E+08 | 8.27E+08 | 3.47E+08 | 4.46E+08 | 5.53E+08 | 5.16E+08 | 7.43E+08 | 1.09E+09 | 5.63E+08 | 7.07E+08 | 5.55E+08 |
| PC(40:9)+H          | PC | (40:9)  | (40:9)  | 4.22E+08 | 1.88E+07 | 3.24E+07 | 2.06E+07 | 8.37E+06 | 3.76E+07 | 0.00E+00 | 0.00E+00 | 0.00E+00 | 0.00E+00 | 5.93E+07 | 1.59E+07 |
| PC(18:1/23:0)+HCOO  | PC | (18:1)  | (23:0)  | 7.17E+06 | 2.92E+06 | 6.75E+07 | 2.17E+06 | 5.17E+05 | 0.00E+00 | 3.64E+06 | 0.00E+00 | 2.52E+06 | 2.45E+06 | 8.07E+05 | 6.65E+05 |
| PC(41:1)+H          | PC | (18:1)  | (23:0)  | 1.19E+08 | 8.14E+07 | 7.34E+06 | 0.00E+00 | 0.00E+00 | 0.00E+00 | 4.25E+06 | 0.00E+00 | 1.64E+06 | 0.00E+00 | 0.00E+00 | 0.00E+00 |
| PC(18:1/23:0)+HCOO  | PC | (18:1)  | (23:0)  | 4.72E+05 | 3.09E+05 | 9.03E+05 | 1.19E+05 | 4.90E+05 | 3.46E+05 | 1.10E+07 | 1.60E+06 | 1.12E+06 | 1.10E+06 | 1.35E+06 | 3.69E+05 |
| PC(41:1)+H          | PC | (18:1)  | (23:0)  | 1.10E+08 | 5.28E+07 | 7.45E+06 | 2.62E+06 | 0.00E+00 | 0.00E+00 | 1.78E+07 | 0.00E+00 | 2.27E+06 | 0.00E+00 | 0.00E+00 | 0.00E+00 |
| PC(25:2/16:0)+H     | PC | (25:2)  | (16:0)  | 9.76E+07 | 3.88E+07 | 1.40E+08 | 4.54E+06 | 0.00E+00 | 0.00E+00 | 2.05E+07 | 4.18E+06 | 8.04E+06 | 0.00E+00 | 0.00E+00 | 0.00E+00 |
| PC(18:1/23:1)+H     | PC | (18:1)  | (23:1)  | 3.91E+07 | 5.61E+06 | 9.52E+07 | 6.92E+06 | 2.03E+06 | 0.00E+00 | 2.84E+07 | 0.00E+00 | 1.16E+07 | 2.21E+06 | 0.00E+00 | 6.67E+06 |
| PC(41:3)+H          | PC | (41:3)  | (41:3)  | 1.56E+07 | 4.54E+06 | 4.45E+07 | 2.00E+06 | 1.36E+06 | 0.00E+00 | 5.88E+06 | 0.00E+00 | 1.85E+06 | 2.25E+06 | 1.95E+06 | 2.21E+06 |
| PC(41:4)+H          | PC | (41:4)  | (41:4)  | 4.29E+07 | 8.05E+07 | 1.23E+07 | 8.49E+04 | 0.00E+00 | 0.00E+00 | 1.98E+07 | 0.00E+00 | 1.03E+07 | 2.95E+06 | 2.07E+06 | 0.00E+00 |
| PC(41:5)+H          | PC | (41:5)  | (41:5)  | 1.00E+09 | 1.44E+07 | 1.71E+07 | 0.31E+09 | 0.00E+00 | 0.00E+00 | 3.71E+09 | 0.00E+00 | 8.44E+09 | 1.19E+07 | 0.00E+00 | 0.00E+00 |
| PC(41:6)+H          | PC | (41:6)  | (41:6)  | 8.70E+06 | 8.84E+05 | 1.08E+07 | 1.03E+06 | 0.00E+00 | 8.04E+05 | 1.77E+06 | 5.90E+06 | 1.68E+06 | 0.00E+00 | 0.00E+00 | 0.00E+00 |
| PC(18:1/24:0)+HCOO  | PC | (18:1)  | (24:0)  | 0.00E+00 | 6.30E+07 | 3.66E+07 | 4.79E+07 | 2.43E+07 | 1.39E+07 | 5.38E+06 | 1.37E+07 | 5.35E+06 | 9.08E+07 | 1.02E+07 | 8.58E+07 |
| PC(42:1)+H          | PC | (18:1)  | (24:0)  | 0.00E+00 | 2.32E+07 | 6.15E+08 | 0.00E+00 | 0.00E+00 | 0.00E+00 | 3.47E+06 | 0.00E+00 | 3.12E+04 | 0.00E+00 | 0.00E+00 | 1.50E+04 |
| PC(18:1/24:0)+HCOO  | PC | (18:1)  | (24:0)  | 7.53E+07 | 6.18E+07 | 1.05E+08 | 1.37E+08 | 2.03E+07 | 7.12E+07 | 1.96E+07 | 1.28E+08 | 4.42E+07 | 9.65E+07 | 6.50E+07 | 8.85E+07 |
| PC(42:1)+H          | PC | (18:1)  | (24:0)  | 5.70E+08 | 4.52E+08 | 6.10E+08 | 0.00E+00 | 0.00E+00 | 1.01E+07 | 2.53E+08 | 0.00E+00 | 1.53E+08 | 1.51E+07 | 0.00E+00 | 0.00E+00 |
| PC(20:4/22:6)+HCOO  | PC | (20:4)  | (22:6)  | 2.00E+07 | 8.60E+06 | 1.12E+07 | 2.46E+07 | 3.09E+07 | 3.09E+07 | 2.98E+07 | 2.46E+07 | 1.19E+07 | 1.19E+07 | 1.19E+07 | 1.19E+07 |
| PC(42:10)+H         | PC | (20:4)  | (22:6)  | 6.17E+07 | 6.00E+07 | 1.49E+08 | 1.36E+08 | 2.68E+08 | 4.66E+08 | 8.95E+07 | 2.17E+08 | 2.46E+08 | 4.66E+08 | 5.69E+08 | 9.60E+08 |
| PC(20:4/22:6)+HCOO  | PC | (20:4)  | (22:6)  | 2.78E+07 | 4.25E+06 | 1.03E+07 | 2.58E+06 | 3.16E+06 | 8.72E+06 | 1.15E+07 | 2.56E+07 | 6.84E+06 | 2.58E+06 | 5.48E+06 | 6.71E+06 |
| PC(42:10)+H         | PC | (20:4)  | (22:6)  | 6.17E+07 | 8.29E+07 | 1.07E+08 | 9.53E+07 | 1.53E+08 | 4.64E+08 | 1.22E+08 | 2.23E+08 | 2.46E+08 | 2.93E+08 | 8.52E+08 | 9.38E+08 |
| PC(42:10)+H         | PC | (42:10) | (42:10) | 1.72E+07 | 1.98E+07 | 1.03E+08 | 2.66E+08 | 1.09E+08 | 1.42E+08 | 1.43E+08 | 2.04E+08 | 2.87E+08 | 2.00E+00 | 0.00E+00 | 0.00E+00 |
| PC(42:10)+H         | PC | (42:10) | (42:10) | 7.22E+08 | 3.52E+08 | 8.89E+08 | 6.77E+08 | 2.79E+07 | 5.90E+07 | 9.36E+06 | 1.37E+07 | 3.47E+07 | 1.95E+08 | 8.53E+08 | 8.53E+08 |
| PC(42:10)+H         | PC | (42:10) | (42:10) | 5.12E+07 | 2.48E+07 | 6.22E+08 | 6.22E+08 | 2.95E+07 | 4.06E+07 | 5.51E+06 | 2.03E+07 | 2.15E+07 | 6.80E+08 | 7.39E+07 | 8.33E+08 |
| PC(42:10)+H         | PC | (42:10) | (42:10) | 3.36E+05 | 3.94E+05 | 0.00E+00 | 0.00E+00 | 0.00E+00 | 0.00E+00 | 0.00E+00 | 0.00E+00 | 5.02E+06 | 2.13E+06 | 0.00E+00 | 0.00E+00 |
| PC(42:11)+H         | PC | (42:11) | (42:11) | 3.19E+06 | 0.00E+00 | 1.07E+07 | 0.00E    |          |          |          |          |          |          |          |          |

|                       |    |                |          |          |          |          |          |          |          |          |          |          |          |          |
|-----------------------|----|----------------|----------|----------|----------|----------|----------|----------|----------|----------|----------|----------|----------|----------|
| PC(44:3p)+H           | PC | (44:3p)        | 5.19E+08 | 2.25E+08 | 2.60E+08 | 1.81E+07 | 1.65E+07 | 0.00E+00 | 1.28E+08 | 3.20E+07 | 1.91E+08 | 4.67E+07 | 3.06E+07 | 1.03E+07 |
| PC(24:0/20:4)+HCOO    | PC | (24:0) (20:4)  | 8.09E+06 | 5.45E+06 | 0.00E+00 | 7.62E+06 | 6.97E+06 | 1.38E+07 | 2.66E+05 | 5.19E+06 | 3.50E+06 | 2.26E+07 | 3.18E+07 | 4.62E+06 |
| PC(44:4)+H            | PC | (24:0) (20:4)  | 1.70E+08 | 4.35E+08 | 1.13E+08 | 1.63E+06 | 4.76E+06 | 8.89E+06 | 2.75E+07 | 2.31E+06 | 1.15E+07 | 3.15E+07 | 1.30E+07 | 8.51E+07 |
| PC(24:0/20:4)+HCOO    | PC | (24:0) (20:4)  | 1.98E+06 | 1.08E+07 | 2.78E+06 | 4.58E+06 | 2.33E+07 | 2.28E+07 | 5.34E+06 | 2.77E+06 | 2.11E+06 | 2.11E+06 | 1.31E+06 | 5.60E+06 |
| PC(44:4)+H            | PC | (24:0) (20:4)  | 5.01E+07 | 8.89E+07 | 3.27E+07 | 6.25E+03 | 3.10E+04 | 1.50E+07 | 1.79E+07 | 1.55E+06 | 4.64E+06 | 2.91E+06 | 1.83E+06 | 8.81E+05 |
| PC(44:4)+H            | PC | (44:4)         | 1.48E+07 | 0.00E+00 | 2.50E+07 | 0.00E+00 | 0.00E+00 | 0.00E+00 | 5.30E+06 | 0.00E+00 | 0.00E+00 | 0.00E+00 | 0.00E+00 | 0.00E+00 |
| PC(24:1/20:4)+HCOO    | PC | (24:1) (20:4)  | 5.41E+06 | 3.19E+06 | 2.60E+04 | 1.21E+06 | 1.12E+06 | 1.27E+07 | 3.74E+06 | 7.72E+06 | 8.59E+06 | 8.06E+05 | 1.26E+07 | 1.62E+07 |
| PC(44:5)+H            | PC | (24:1) (20:4)  | 1.30E+08 | 2.09E+08 | 8.62E+06 | 5.94E+06 | 7.64E+06 | 5.25E+07 | 3.13E+08 | 1.10E+08 | 1.16E+08 | 5.31E+07 | 1.45E+08 | 1.82E+08 |
| PC(44:5)+H            | PC | (44:5)         | 2.56E+07 | 7.49E+07 | 3.21E+07 | 0.00E+00 | 2.48E+04 | 3.16E+06 | 2.18E+07 | 5.80E+06 | 8.76E+07 | 3.12E+06 | 6.57E+07 | 2.23E+06 |
| PC(44:6)+H            | PC | (44:6)         | 3.98E+06 | 9.71E+06 | 2.33E+07 | 3.77E+06 | 7.21E+06 | 9.90E+06 | 8.94E+06 | 5.80E+06 | 2.91E+07 | 8.38E+06 | 5.01E+06 | 2.40E+07 |
| PC(44:6)+H            | PC | (44:6)         | 5.06E+07 | 5.09E+07 | 1.08E+07 | 4.27E+06 | 0.00E+00 | 7.77E+06 | 1.26E+07 | 1.07E+06 | 9.20E+06 | 2.86E+07 | 9.17E+06 | 1.77E+07 |
| PC(44:6)+H            | PC | (44:6)         | 3.14E+07 | 7.40E+07 | 6.80E+06 | 2.39E+06 | 1.42E+06 | 3.67E+06 | 4.60E+06 | 1.78E+06 | 6.53E+06 | 0.00E+00 | 0.00E+00 | 0.00E+00 |
| PC(22:1/22:6)+HCOO    | PC | (22:1) (22:6)  | 4.39E+06 | 5.87E+06 | 4.66E+05 | 1.87E+04 | 0.00E+00 | 7.96E+05 | 5.96E+03 | 3.90E+05 | 5.00E+05 | 5.70E+05 | 1.22E+06 | 1.40E+06 |
| PC(44:7)+H            | PC | (22:1) (22:6)  | 1.72E+08 | 5.19E+07 | 5.86E+07 | 1.29E+07 | 1.01E+07 | 1.59E+07 | 6.10E+06 | 1.24E+07 | 6.91E+06 | 1.14E+07 | 2.16E+07 | 1.69E+07 |
| PC(24:4/20:4)+HCOO    | PC | (24:4) (20:4)  | 0.00E+00 | 0.00E+00 | 0.00E+00 | 1.36E+06 | 1.24E+06 | 2.76E+05 | 5.27E+05 | 0.00E+00 | 2.98E+06 | 1.12E+06 | 2.28E+06 | 1.75E+06 |
| PC(44:8)+H            | PC | (24:4) (20:4)  | 8.59E+06 | 1.15E+07 | 1.01E+07 | 2.13E+07 | 3.03E+08 | 7.61E+07 | 5.47E+07 | 3.87E+07 | 8.39E+07 | 9.22E+07 | 9.15E+07 | 5.13E+07 |
| PC(44:8)+H            | PC | (44:8)         | 2.11E+07 | 1.54E+07 | 7.84E+06 | 9.59E+06 | 4.51E+07 | 9.83E+07 | 3.21E+07 | 2.80E+07 | 1.62E+07 | 7.64E+07 | 3.88E+07 | 5.07E+07 |
| PC(44:9)+H            | PC | (44:9)         | 1.69E+06 | 8.07E+06 | 4.09E+06 | 6.78E+06 | 1.67E+07 | 0.00E+00 | 3.75E+07 | 1.22E+07 | 8.56E+06 | 9.27E+06 | 6.74E+06 | 5.22E+06 |
| PC(45:11)+H           | PC | (45:11)        | 5.86E+06 | 1.90E+06 | 2.34E+06 | 0.00E+00 | 8.69E+03 | 2.67E+06 | 0.00E+00 | 7.27E+06 | 3.97E+06 | 0.00E+00 | 1.72E+06 | 3.31E+06 |
| PC(25:4/20:4)+CH3COO  | PC | (25:4) (20:4)  | 0.00E+00 | 0.00E+00 | 0.00E+00 | 1.56E+07 | 1.67E+07 | 1.15E+07 | 3.04E+06 | 1.42E+06 | 0.00E+00 | 9.88E+06 | 1.39E+07 | 1.03E+07 |
| PC(46:13)+H           | PC | (46:13)        | 0.00E+00 | 1.27E+06 | 1.42E+07 | 9.29E+07 | 3.64E+07 | 6.28E+07 | 5.08E+06 | 7.42E+07 | 1.24E+06 | 6.79E+07 | 6.18E+07 | 7.74E+07 |
| PC(22:6/24:7)+H       | PC | (22:6) (24:7)  | 4.95E+07 | 4.56E+07 | 9.69E+08 | 1.67E+09 | 2.22E+09 | 1.08E+09 | 3.78E+06 | 2.19E+09 | 2.26E+09 | 2.00E+09 | 1.42E+09 | 1.26E+09 |
| PC(46:13)+H           | PC | (46:13)        | 7.72E+08 | 6.76E+08 | 8.86E+08 | 1.55E+09 | 2.15E+09 | 6.64E+08 | 1.05E+04 | 2.10E+09 | 5.31E+08 | 2.00E+09 | 1.42E+09 | 1.26E+09 |
| PC(22:6/24:7)+H       | PC | (22:6) (24:7)  | 0.00E+00 | 0.00E+00 | 0.00E+00 | 0.00E+00 | 0.00E+00 | 0.00E+00 | 9.13E+07 | 0.00E+00 | 0.00E+00 | 0.00E+00 | 0.00E+00 | 0.00E+00 |
| PC(46:13)+H           | PC | (46:13)        | 0.00E+00 | 0.00E+00 | 0.00E+00 | 0.00E+00 | 0.00E+00 | 0.00E+00 | 1.06E+06 | 0.00E+00 | 0.00E+00 | 0.00E+00 | 0.00E+00 | 0.00E+00 |
| PC(24:0/22:6)+HCOO    | PC | (24:0) (22:6)  | 7.57E+06 | 1.02E+06 | 1.08E+06 | 5.85E+05 | 4.25E+05 | 9.14E+05 | 0.00E+00 | 2.72E+05 | 2.57E+05 | 6.01E+05 | 1.29E+06 | 2.23E+06 |
| PC(46:6)+H            | PC | (24:0) (22:6)  | 9.85E+07 | 6.16E+07 | 4.18E+07 | 5.36E+06 | 0.00E+00 | 3.93E+06 | 4.71E+06 | 3.39E+06 | 8.28E+06 | 5.07E+06 | 1.14E+07 | 2.00E+07 |
| PC(46:7)+H            | PC | (46:7)         | 4.54E+07 | 7.38E+06 | 2.99E+07 | 0.00E+00 | 0.00E+00 | 2.94E+07 | 6.80E+06 | 0.00E+00 | 2.53E+06 | 8.14E+06 | 0.00E+00 | 1.53E+07 |
| PC(29:1/18:1)+H       | PC | (29:1) (18:1)  | 1.95E+07 | 1.15E+06 | 1.00E+06 | 2.00E+06 | 1.56E+06 | 1.05E+06 | 2.10E+06 | 2.10E+06 | 3.58E+06 | 2.22E+07 | 0.00E+00 | 0.00E+00 |
| PC(28:5/20:4)+HCOO    | PC | (28:5) (20:4)  | 0.00E+00 | 0.00E+00 | 0.00E+00 | 2.50E+06 | 1.49E+06 | 6.49E+06 | 1.77E+06 | 0.00E+00 | 1.50E+06 | 1.46E+06 | 3.20E+06 | 1.20E+07 |
| PE(16:0e)+H           | PE | (16:0e)        | 2.09E+07 | 1.88E+07 | 1.32E+07 | 2.51E+07 | 1.88E+07 | 2.73E+07 | 1.51E+08 | 2.73E+07 | 1.76E+08 | 3.21E+08 | 9.08E+07 | 9.71E+07 |
| PE(16:0e)+H           | PE | (16:0e)        | 1.57E+08 | 1.19E+08 | 1.30E+08 | 2.27E+08 | 2.28E+08 | 4.31E+08 | 1.52E+08 | 2.24E+08 | 1.98E+08 | 3.69E+08 | 9.00E+08 | 1.08E+09 |
| PE(16:0p)+H           | PE | (16:0p)        | 5.67E+05 | 1.49E+06 | 1.91E+06 | 2.36E+07 | 2.39E+06 | 2.04E+06 | 1.31E+07 | 3.58E+05 | 5.90E+06 | 2.17E+07 | 6.51E+07 | 5.31E+07 |
| PE(16:0e)+H           | PE | (18:0e)        | 4.23E+08 | 2.66E+08 | 3.00E+08 | 4.56E+08 | 7.13E+08 | 5.39E+08 | 5.47E+08 | 7.61E+08 | 7.87E+08 | 7.84E+08 | 6.92E+08 | 1.09E+09 |
| PE(18:0p)+H           | PE | (18:0p)        | 1.25E+08 | 9.09E+07 | 4.16E+07 | 1.84E+08 | 5.76E+07 | 9.68E+07 | 5.41E+07 | 4.55E+07 | 3.13E+07 | 9.46E+07 | 1.20E+08 | 2.05E+08 |
| PE(18:0p)+H           | PE | (18:0p)        | 1.25E+08 | 1.51E+08 | 1.77E+08 | 1.88E+08 | 2.73E+08 | 2.54E+08 | 1.58E+08 | 1.59E+08 | 2.31E+08 | 3.90E+08 | 9.84E+07 | 1.00E+09 |
| PE(19:1)+H            | PE | (19:1)         | 1.40E+07 | 7.07E+06 | 1.75E+03 | 3.30E+05 | 1.70E+05 | 6.68E+05 | 0.00E+00 | 1.67E+05 | 0.00E+00 | 0.00E+00 | 0.00E+00 | 4.10E+05 |
| PE(30:0e)+(CH3CH2)3NH | PE | (30:0e)        | 1.62E+07 | 2.56E+05 | 5.23E+05 | 1.18E+08 | 1.18E+08 | 1.97E+08 | 0.00E+00 | 3.38E+07 | 3.17E+06 | 9.75E+07 | 1.62E+08 | 2.70E+08 |
| PE(16:0p/14:0)+H      | PE | (16:0p) (14:0) | 0.00E+00 | 6.85E+06 | 0.00E+00 | 4.04E+07 | 5.41E+04 | 1.26E+07 | 4.08E+03 | 7.41E+05 | 1.71E+04 | 7.96E+06 | 1.16E+07 | 1.26E+07 |
| PE(16:0/16:0)+H       | PE | (16:0) (16:0)  | 0.00E+00 | 0.00E+00 | 0.00E+00 | 2.18E+06 | 0.00E+00 | 1.48E+07 | 0.00E+00 | 0.00E+00 | 0.00E+00 | 4.91E+06 | 7.73E+06 | 2.43E+07 |
| PE(16:0/16:0)+H       | PE | (16:0) (16:0)  | 1.96E+07 | 2.09E+07 | 4.21E+06 | 3.01E+07 | 1.25E+07 | 5.35E+07 | 1.23E+07 | 1.87E+07 | 9.99E+06 | 2.46E+07 | 8.19E+07 | 1.56E+08 |
| PE(16:0/16:0)+H       | PE | (16:0) (16:0)  | 4.99E+05 | 4.98E+05 | 7.75E+05 | 7.27E+05 | 1.28E+06 | 4.50E+07 | 3.11E+06 | 6.14E+06 | 6.14E+06 | 2.22E+07 | 9.49E+07 | 1.49E+08 |
| PE(32:0p)+H           | PE | (32:0p)        | 0.00E+00 | 0.00E+00 | 0.00E+00 | 9.14E+06 | 0.00E+00 | 3.38E+07 | 1.70E+06 | 3.12E+05 | 1.24E+06 | 8.81E+06 | 1.51E+07 | 5.45E+07 |
| PE(16:0p/16:0)+H      | PE | (16:0p) (16:0) | 2.21E+08 | 2.60E+08 | 1.01E+08 | 3.52E+08 | 8.20E+07 | 2.89E+08 | 2.30E+07 | 2.34E+07 | 3.73E+08 | 3.90E+08 | 4.44E+08 | 4.44E+08 |
| PE(16:0p/16:0)+H      | PE | (16:0p) (16:0) | 2.57E+08 | 3.92E+08 | 6.08E+08 | 3.30E+08 | 4.12E+07 | 1.99E+08 | 8.04E+07 | 2.75E+07 | 8.30E+07 | 5.46E+08 | 5.10E+08 | 3.65E+08 |
| PE(16:0p/16:0)+H      | PE | (16:0p) (16:0) | 1.75E+08 | 2.60E+08 | 1.01E+08 | 1.40E+08 | 2.46E+07 | 1.12E+08 | 1.23E+07 | 3.02E+07 | 5.77E+07 | 1.55E+08 | 1.70E+08 | 1.34E+08 |
| PE(16:0/16:1)+H       | PE | (16:0) (16:1)  | 5.46E+07 | 9.83E+07 | 2.53E+07 | 1.20E+08 | 2.66E+07 | 1.31E+08 | 1.91E+07 | 5.17E+06 | 9.41E+06 | 7.81E+07 | 1.53E+08 | 1.77E+08 |
| PE(16:0/16:1)+H       | PE | (16:0) (16:1)  | 2.61E+07 | 7.88E+07 | 3.94E+07 | 3.66E+06 | 1.19E+07 | 5.93E+06 | 5.39E+06 | 3.05E+06 | 4.98E+06 | 3.98E+07 | 9.84E+07 | 6.12E+07 |
| PE(16:0p/16:1)+H      | PE | (16:0p) (16:1) | 4.37E+08 | 2.79E+08 | 4.05E+08 | 5.88E+08 | 1.64E+08 | 7.37E+08 | 1.06E+08 | 1.18E+08 | 9.46E+07 | 5.40E+08 | 7.71E+08 | 8.24E+08 |
| PE(16:0p/16:1)+H      | PE | (16:0p) (16:1) | 3.89E+08 | 3.78E+08 | 1.62E+08 | 3.21E+08 | 4.47E+07 | 4.13E+08 | 1.15E+08 | 5.03E+07 | 9.84E+07 | 3.81E+08 | 4.84E+08 | 5.78E+08 |
| PE(16:0p/16:1)+H      | PE | (16:0p) (16:1) | 3.35E+08 | 7.13E+07 | 5.53E+07 | 5.69E+08 | 4.05E+07 | 2.72E+08 | 1.73E+07 | 8.26E+06 | 1.57E+07 | 2.05E+08 | 2.01E+08 | 4.60E+08 |
| PE(16:0p/16:1)+H      | PE | (16:0p) (16:1) | 1.17E+08 | 5.73E+07 | 6.27E+06 | 6.82E+07 | 6.00E+06 | 9.35E+07 | 2.63E+07 | 8.20E+06 | 1.93E+07 | 1.79E+08 | 9.47E+07 | 7.01E+07 |
| PE(16:1/16:1)+H       | PE | (16:1) (16:1)  | 4.83E+06 | 1.69E+07 | 2.09E+06 | 6.72E+06 | 2.28E+06 | 1.53E+07 | 2.40E+05 | 3.49E+06 | 1.72E+03 | 1.69E+07 | 3.82E+06 | 2.59E+06 |
| PE(16:1/16:1)+H       | PE | (16:1) (16:1)  | 4.00E+06 | 4.02E+07 | 1.54E+06 | 4.15E+06 | 4.88E+06 | 0.00E+00 | 6.31E+06 | 8.13E+06 | 4.13E+06 | 0.00E+00 | 6.72E+06 | 8.94E+06 |
| PE(16:0p/17:1)+H      | PE | (16:0p) (17:1) | 4.99E+07 | 3.18E+07 | 7.35E+07 | 1.26E+07 | 1.48E+06 | 1.76E+07 | 2.31E+07 | 5.27E+06 | 4.48E+06 | 1.72E+07 | 8.88E+06 | 1.44E+07 |
| PE(16:0p/17:1)+H      | PE | (16:0p) (17:1) | 7.25E+07 | 0.00E+00 | 7.01E+07 | 1.95E+06 | 0.00E+00 | 1.65E+06 | 3.81E+06 | 2.22E+04 | 0.00E+00 | 2.31E+06 | 0.00E+00 | 9.67E+06 |
| PE(18:0/16:0)+H       | PE | (18:0) (16:0)  | 2.46E+07 | 7.64E+06 | 1.24E+07 | 1.50E+07 | 2.10E+07 | 2.20E+07 | 2.40E+07 | 1.77E+07 | 1.06E+07 | 4.55E+07 | 7.53E+07 | 1.01E+08 |
| PE(18:0/16:0)+H       | PE | (18:0) (16:0)  | 3.66E+07 | 2.29E+07 | 1.16E+07 | 4.67E+07 | 5.28E+06 | 1.01E+08 | 7.86E+06 | 2.09E+06 | 4.55E+07 | 2.44E+06 | 1.67E+06 | 1.67E+06 |
| PE(34:0p)+H           | PE | (34:0p)        | 5.08E+04 | 0.00E+00 | 1.08E+06 | 4.93E+07 | 3.63E+07 | 6.61E+07 | 0.00E+00 | 2.45E+06 | 7.49E+06 | 1.70E+07 | 3.82E+07 | 3.90E+07 |
| PE(16:0p/18:1)+H      | PE | (16:0p) (18:1) | 1.45E+08 | 1.10E+08 | 1.61E+08 | 4.96E+07 | 2.03E+07 | 1.21E+08 | 0.00E+00 | 8.56E+07 | 4.00E+06 | 6.48E+07 | 3.28E+07 | 4.06E+07 |
| PE(16:0/18:1)+H       | PE | (16:0) (18:1)  | 1.95E+06 | 0.00E+00 | 0.00E+00 | 8.90E+06 | 0.00E+00 | 3.46E+07 | 1.31E+03 | 4.35E+03 | 4.35E+03 | 2.94E+07 | 8.92E+07 | 1.29E+07 |
| PE(16:0/18:1)+H       | PE | (16:0) (18:1)  | 0.00E+00 | 0.00E+00 | 1.76E+06 | 1.36E+06 | 0.00E+00 | 2.67E+07 | 0.00E+00 | 2.06E+05 | 4.07E+05 | 9.12E+06 | 1.85E+07 | 5.85E+07 |
| PE(16:0/18:1)+H       | PE | (16:0) (18:1)  | 7.15E+08 | 1.17E+09 | 1.13E+09 | 1.34E+09 | 7.05E+08 | 2.57E+09 | 4.66E+08 | 6.26E+08 | 1.77E+09 | 1.89E+09 | 3.69E+09 | 3.69E+09 |
| PE(16:0/18:1)+H       | PE | (16:           |          |          |          |          |          |          |          |          |          |          |          |          |

|                  |    |         |        |          |          |          |          |          |          |          |          |          |          |          |          |
|------------------|----|---------|--------|----------|----------|----------|----------|----------|----------|----------|----------|----------|----------|----------|----------|
| PE(16:0/20:4)-H  | PE | (16:0)  | (20:4) | 1.06E+09 | 9.92E+08 | 5.30E+08 | 1.69E+09 | 2.07E+09 | 1.82E+09 | 9.41E+08 | 1.41E+09 | 2.86E+08 | 1.82E+09 | 2.18E+09 | 9.94E+08 |
| PE(16:0/20:4)-H  | PE | (16:0)  | (20:4) | 0.00E+00 | 0.00E+00 | 1.48E+05 | 1.34E+03 | 3.75E+03 | 1.37E+05 | 0.00E+00 | 5.40E+05 | 0.00E+00 | 0.00E+00 | 1.38E+05 | 1.79E+06 |
| PE(16:0/20:4)-H  | PE | (16:0p) | (20:4) | 6.49E+09 | 4.58E+09 | 6.95E+09 | 1.10E+10 | 1.13E+10 | 1.50E+10 | 6.29E+09 | 6.44E+09 | 7.11E+09 | 1.33E+10 | 1.45E+10 | 1.57E+10 |
| PE(16:0p/20:4)-H | PE | (16:0p) | (20:4) | 7.29E+09 | 5.40E+09 | 7.94E+09 | 1.04E+10 | 8.94E+09 | 9.04E+09 | 7.09E+09 | 8.89E+09 | 7.18E+09 | 1.03E+10 | 1.53E+10 | 9.84E+09 |
| PE(16:0p/20:4)-H | PE | (16:0p) | (20:4) | 1.06E+09 | 4.55E+09 | 6.83E+09 | 1.11E+10 | 1.12E+10 | 5.70E+09 | 6.41E+09 | 0.00E+00 | 0.00E+00 | 1.32E+10 | 1.02E+10 | 2.23E+09 |
| PE(16:0p/20:4)-H | PE | (16:0p) | (20:4) | 1.05E+06 | 0.00E+00 | 0.00E+00 | 6.97E+07 | 0.00E+00 | 3.44E+07 | 1.47E+07 | 1.50E+07 | 0.00E+00 | 0.00E+00 | 4.00E+07 | 0.00E+00 |
| PE(16:0p/20:4)-H | PE | (16:0p) | (20:4) | 2.50E+08 | 1.12E+08 | 2.09E+08 | 0.00E+00 | 3.79E+07 | 0.00E+00 |
| PE(16:0p/20:4)-H | PE | (16:0p) | (20:4) | 0.00E+00 | 3.21E+06 | 6.12E+06 | 8.70E+06 | 2.50E+07 | 9.54E+06 | 4.45E+06 | 3.42E+06 | 0.00E+00 | 0.00E+00 | 0.00E+00 | 0.00E+00 |
| PE(16:0p/20:4)-H | PE | (16:0p) | (20:4) | 0.00E+00 | 8.85E+05 | 2.13E+06 | 7.16E+05 | 9.50E+06 | 6.79E+05 | 1.76E+06 | 0.00E+00 | 2.42E+06 | 0.00E+00 | 0.00E+00 | 0.00E+00 |
| PE(16:0p/20:4)-H | PE | (16:0p) | (20:4) | 0.00E+00 | 1.33E+06 | 5.31E+06 | 1.89E+06 | 2.12E+06 | 4.35E+06 | 2.80E+06 | 2.64E+06 | 0.00E+00 | 0.00E+00 | 0.00E+00 | 2.38E+06 |
| PE(16:0p/20:4)-H | PE | (16:0p) | (20:4) | 0.00E+00 | 9.16E+05 | 0.00E+00 | 2.05E+06 | 1.88E+06 | 1.54E+06 | 2.72E+06 | 2.71E+05 | 4.48E+06 | 1.27E+06 | 5.35E+06 | 3.57E+06 |
| PE(16:0p/20:4)-H | PE | (16:0p) | (20:4) | 0.00E+00 | 3.93E+05 | 1.57E+05 | 2.55E+06 | 3.50E+06 | 1.39E+06 | 2.65E+06 | 9.12E+05 | 2.66E+06 | 1.77E+06 | 5.95E+05 | 1.96E+06 |
| PE(16:0p/20:4)-H | PE | (16:0p) | (20:4) | 2.77E+06 | 7.64E+05 | 2.67E+06 | 1.85E+06 | 2.63E+06 | 7.09E+05 | 6.09E+05 | 1.26E+06 | 4.70E+06 | 3.22E+06 | 5.14E+06 | 5.14E+06 |
| PE(16:0p/20:4)-H | PE | (16:0p) | (20:4) | 1.70E+07 | 4.15E+06 | 7.99E+06 | 0.00E+00 | 0.00E+00 | 0.00E+00 | 5.52E+06 | 0.00E+00 | 6.35E+06 | 7.08E+06 | 0.00E+00 | 0.00E+00 |
| PE(16:1/20:4)-H  | PE | (16:1)  | (20:4) | 3.86E+07 | 3.54E+07 | 2.18E+07 | 1.17E+08 | 4.07E+07 | 1.33E+08 | 9.00E+06 | 2.51E+07 | 1.75E+07 | 7.07E+07 | 1.61E+08 | 1.52E+08 |
| PE(16:1/20:4)-H  | PE | (16:1)  | (20:4) | 6.53E+07 | 0.00E+00 | 3.64E+07 | 3.09E+08 | 9.41E+07 | 3.15E+08 | 3.38E+07 | 6.88E+07 | 3.24E+07 | 2.33E+08 | 4.18E+08 | 5.62E+08 |
| PE(16:1/20:4)-H  | PE | (16:1)  | (20:4) | 3.40E+07 | 3.39E+07 | 7.50E+07 | 7.23E+07 | 5.19E+07 | 1.30E+08 | 6.13E+06 | 5.48E+07 | 1.09E+07 | 5.53E+07 | 1.08E+08 | 1.21E+08 |
| PE(16:5/20:4)-H  | PE | (16:5)  | (20:4) | 0.00E+00 | 0.00E+00 | 0.00E+00 | 0.00E+00 | 0.00E+00 | 1.67E+05 | 0.00E+00 | 0.00E+00 | 0.00E+00 | 3.40E+03 | 9.81E+05 | 1.01E+06 |
| PE(16:1p/20:4)-H | PE | (16:1p) | (20:4) | 1.89E+05 | 5.16E+05 | 0.00E+00 | 3.82E+05 | 2.75E+05 | 1.80E+07 | 0.00E+00 | 0.00E+00 | 8.74E+04 | 5.61E+06 | 1.62E+06 | 1.74E+06 |
| PE(16:0p/20:5)-H | PE | (16:0p) | (20:5) | 1.73E+08 | 9.60E+07 | 3.16E+08 | 1.92E+07 | 1.43E+07 | 4.83E+07 | 1.37E+08 | 1.47E+08 | 1.67E+07 | 5.46E+07 | 1.09E+07 | 1.09E+07 |
| PE(16:0p/20:5)-H | PE | (16:0p) | (20:5) | 4.65E+07 | 1.51E+08 | 7.13E+07 | 6.81E+06 | 1.43E+07 | 2.06E+07 | 8.55E+06 | 1.52E+08 | 1.65E+07 | 1.74E+07 | 1.96E+07 | 1.46E+07 |
| PE(14:0/22:6)-H  | PE | (14:0)  | (22:6) | 0.00E+00 | 1.39E+04 | 4.16E+05 | 9.05E+05 | 6.23E+03 | 7.20E+06 | 3.52E+05 | 6.41E+05 | 1.15E+06 | 1.55E+06 | 0.00E+00 | 1.32E+07 |
| PE(14:0/22:6)-H  | PE | (14:0)  | (22:6) | 0.00E+00 | 1.64E+03 | 1.87E+05 | 6.08E+05 | 2.79E+07 | 2.70E+06 | 4.05E+05 | 3.79E+05 | 1.13E+06 | 1.13E+06 | 9.20E+06 | 2.11E+06 |
| PE(14:0p/22:6)-H | PE | (14:0p) | (22:6) | 2.00E+07 | 3.41E+06 | 0.00E+00 | 5.17E+05 | 1.18E+06 | 4.36E+06 | 1.02E+06 | 4.05E+06 | 4.14E+06 | 2.49E+06 | 2.99E+06 | 2.01E+07 |
| PE(14:0p/22:6)-H | PE | (14:0p) | (22:6) | 1.83E+07 | 1.19E+07 | 6.22E+06 | 2.00E+06 | 9.64E+05 | 1.15E+07 | 1.76E+06 | 1.02E+07 | 5.45E+06 | 1.01E+07 | 1.42E+07 | 1.57E+07 |
| PE(14:0p/22:6)-H | PE | (14:0p) | (22:6) | 4.64E+06 | 1.74E+06 | 0.00E+00 | 0.00E+00 | 0.00E+00 | 9.80E+05 | 5.73E+03 | 2.74E+05 | 8.35E+03 | 5.98E+06 | 4.90E+06 | 7.52E+06 |
| PE(18:1/19:0)-H  | PE | (18:1)  | (19:0) | 7.43E+06 | 1.28E+06 | 6.49E+06 | 0.00E+00 | 8.81E+05 | 6.08E+05 | 5.17E+05 | 3.95E+05 | 2.27E+05 | 0.00E+00 | 1.18E+06 | 1.87E+06 |
| PE(18:1/19:1)-H  | PE | (18:1)  | (19:1) | 1.62E+06 | 2.20E+07 | 2.99E+06 | 1.26E+06 | 1.08E+04 | 4.33E+06 | 5.15E+03 | 2.32E+06 | 3.73E+05 | 9.91E+06 | 4.13E+05 | 7.54E+06 |
| PE(15:1/18:2)-H  | PE | (15:1)  | (18:2) | 6.15E+07 | 6.23E+07 | 3.73E+07 | 2.79E+07 | 1.99E+06 | 1.99E+06 | 3.00E+06 | 6.71E+06 | 4.07E+06 | 1.27E+07 | 4.49E+06 | 1.39E+07 |
| PE(17:0/20:4)-H  | PE | (17:0)  | (20:4) | 5.08E+03 | 1.77E+05 | 8.77E+06 | 1.00E+08 | 1.04E+08 | 3.70E+07 | 9.71E+06 | 6.92E+07 | 1.90E+07 | 1.02E+08 | 3.24E+07 | 5.02E+07 |
| PE(17:1/20:4)-H  | PE | (17:1)  | (20:4) | 2.11E+07 | 8.39E+07 | 1.23E+07 | 1.80E+08 | 2.03E+07 | 1.20E+08 | 8.60E+06 | 2.59E+07 | 1.91E+07 | 1.81E+07 | 3.05E+07 | 2.00E+07 |
| PE(20:0/18:1)-H  | PE | (20:0)  | (18:1) | 7.84E+07 | 9.91E+07 | 9.59E+07 | 2.73E+07 | 3.35E+07 | 8.41E+07 | 2.99E+07 | 6.14E+06 | 9.15E+07 | 6.74E+07 | 6.23E+07 | 3.50E+06 |
| PE(20:0p/18:1)-H | PE | (20:0p) | (18:1) | 7.04E+07 | 2.37E+07 | 1.31E+07 | 1.80E+07 | 5.39E+07 | 1.68E+07 | 1.43E+07 | 2.27E+07 | 3.97E+07 | 5.14E+07 | 2.89E+07 | 1.61E+07 |
| PE(20:0p/18:1)-H | PE | (20:0p) | (18:1) | 4.27E+07 | 1.37E+07 | 2.16E+06 | 4.58E+07 | 3.76E+07 | 9.93E+06 | 1.18E+07 | 2.10E+07 | 2.19E+07 | 2.09E+07 | 3.72E+07 | 3.50E+06 |
| PE(20:1/18:1)-H  | PE | (20:1)  | (18:1) | 3.27E+08 | 5.33E+08 | 2.99E+08 | 1.91E+08 | 1.75E+08 | 2.57E+08 | 2.57E+08 | 1.83E+08 | 1.83E+08 | 2.93E+08 | 2.96E+08 | 1.84E+08 |
| PE(20:0p/18:2)-H | PE | (20:0p) | (18:2) | 2.47E+08 | 2.47E+07 | 4.40E+07 | 3.80E+07 | 1.15E+08 | 4.17E+07 | 6.85E+06 | 5.07E+07 | 1.54E+07 | 1.22E+08 | 4.96E+07 | 3.66E+07 |
| PE(20:0p/18:2)-H | PE | (20:0p) | (18:2) | 5.99E+07 | 1.80E+08 | 2.69E+07 | 2.45E+07 | 1.51E+07 | 1.40E+07 | 2.89E+07 | 3.69E+07 | 7.28E+07 | 7.34E+07 | 1.29E+07 | 2.35E+07 |
| PE(18:0/20:3)-H  | PE | (18:0)  | (20:3) | 4.70E+08 | 3.79E+08 | 4.52E+08 | 3.50E+08 | 4.14E+08 | 4.97E+08 | 3.43E+08 | 4.43E+08 | 4.95E+08 | 5.69E+08 | 7.13E+08 | 6.58E+08 |
| PE(18:0p/20:3)-H | PE | (18:0p) | (20:3) | 1.08E+08 | 2.19E+07 | 1.68E+08 | 1.29E+09 | 1.06E+09 | 8.22E+08 | 5.61E+08 | 7.57E+08 | 9.36E+08 | 1.22E+09 | 8.36E+08 | 5.11E+07 |
| PE(18:0p/20:3)-H | PE | (18:0p) | (20:3) | 7.71E+08 | 6.84E+08 | 6.30E+08 | 3.63E+08 | 3.81E+08 | 3.26E+08 | 6.92E+08 | 5.35E+08 | 1.18E+09 | 0.00E+00 | 3.62E+08 | 4.12E+08 |
| PE(18:2p/20:3)-H | PE | (18:2p) | (20:3) | 0.00E+00 | 4.37E+08 | 4.27E+08 | 3.04E+08 | 4.47E+08 | 2.92E+08 | 5.61E+08 | 0.00E+00 | 0.00E+00 | 5.65E+08 | 3.66E+08 | 3.31E+08 |
| PE(18:0/22:4)-H  | PE | (18:0)  | (22:4) | 1.62E+08 | 2.21E+08 | 2.82E+08 | 3.67E+08 | 3.48E+08 | 5.16E+08 | 1.48E+08 | 1.40E+08 | 1.00E+09 | 6.52E+08 | 4.55E+08 | 7.25E+08 |
| PE(18:0/20:4)-H  | PE | (18:0)  | (20:4) | 1.75E+09 | 1.70E+09 | 1.60E+09 | 4.10E+09 | 5.28E+09 | 3.39E+09 | 2.04E+09 | 4.09E+09 | 8.40E+09 | 3.47E+09 | 4.73E+09 | 4.11E+09 |
| PE(18:0/20:4)-H  | PE | (18:0)  | (20:4) | 3.78E+09 | 2.65E+09 | 3.17E+09 | 3.79E+09 | 0.00E+00 | 2.78E+09 | 4.80E+09 | 6.39E+09 | 4.73E+09 | 7.18E+09 | 5.12E+09 | 5.31E+09 |
| PE(18:0/20:4)-H  | PE | (18:0)  | (20:4) | 4.52E+06 | 1.76E+06 | 6.44E+05 | 1.51E+06 | 8.57E+06 | 6.99E+05 | 5.87E+06 | 3.97E+06 | 2.97E+06 | 6.64E+06 | 1.19E+07 | 8.94E+05 |
| PE(18:0/20:4)-H  | PE | (18:0)  | (20:4) | 5.57E+06 | 2.19E+06 | 3.64E+06 | 5.61E+06 | 2.97E+06 | 3.39E+06 | 6.16E+06 | 5.51E+05 | 1.61E+07 | 1.24E+07 | 5.30E+06 | 5.30E+06 |
| PE(18:0/20:4)-H  | PE | (18:0)  | (20:4) | 7.60E+05 | 3.33E+05 | 8.12E+05 | 6.39E+06 | 1.60E+07 | 7.69E+06 | 4.52E+06 | 2.39E+06 | 1.94E+06 | 1.79E+06 | 1.04E+07 | 1.52E+07 |
| PE(18:0/20:4)-H  | PE | (18:0)  | (20:4) | 8.71E+06 | 4.90E+05 | 1.72E+06 | 1.66E+06 | 1.72E+06 | 2.84E+06 | 5.60E+06 | 5.50E+06 | 4.36E+06 | 5.35E+06 | 5.46E+06 | 5.46E+06 |
| PE(18:0/20:4)-H  | PE | (18:0)  | (20:4) | 8.40E+05 | 1.65E+06 | 1.02E+06 | 2.68E+06 | 3.76E+06 | 1.45E+06 | 5.63E+06 | 4.80E+06 | 1.96E+06 | 1.66E+06 | 0.00E+00 | 1.01E+07 |
| PE(18:0/20:4)-H  | PE | (18:0)  | (20:4) | 6.18E+06 | 4.10E+06 | 8.59E+06 | 0.00E+00 | 2.33E+07 | 0.00E+00 | 1.32E+07 | 5.15E+04 | 4.03E+07 | 0.00E+00 | 0.00E+00 | 0.00E+00 |
| PE(18:0p/20:4)-H | PE | (18:0p) | (20:4) | 2.67E+09 | 2.16E+09 | 2.44E+09 | 5.89E+09 | 6.64E+09 | 3.94E+09 | 2.23E+09 | 4.48E+09 | 4.82E+09 | 6.15E+09 | 3.76E+09 | 4.68E+09 |
| PE(18:0p/20:4)-H | PE | (18:0p) | (20:4) | 3.69E+09 | 3.27E+09 | 3.31E+09 | 6.84E+09 | 7.98E+09 | 4.95E+09 | 3.36E+09 | 6.22E+09 | 6.93E+09 | 8.62E+09 | 5.43E+09 | 5.97E+09 |
| PE(18:0p/20:4)-H | PE | (18:0p) | (20:4) | 0.00E+00 | 2.34E+09 | 0.00E+00 | 6.47E+08 | 7.32E+09 | 0.00E+00 | 0.00E+00 | 0.00E+00 | 0.00E+00 | 0.00E+00 | 6.83E+09 | 0.00E+00 |
| PE(18:0p/20:4)-H | PE | (18:0p) | (20:4) | 0.00E+00 | 7.38E+05 | 0.00E+00 | 3.44E+06 | 0.00E+00 | 7.20E+06 | 0.00E+00 | 0.00E+00 | 0.00E+00 | 0.00E+00 | 5.14E+06 | 2.81E+06 |
| PE(18:0p/20:4)-H | PE | (18:0p) | (20:4) | 5.14E+06 | 2.56E+06 | 0.00E+00 | 4.57E+06 | 1.23E+07 | 3.48E+06 | 2.51E+06 | 9.67E+06 | 2.71E+06 | 3.00E+06 | 8.53E+06 | 1.53E+07 |
| PE(18:0p/20:4)-H | PE | (18:0p) | (20:4) | 1.30E+06 | 1.05E+07 | 0.00E+00 | 1.39E+07 | 3.79E+07 | 6.22E+06 | 1.09E+06 | 3.32E+06 | 8.88E+06 | 3.95E+06 | 8.20E+06 | 1.48E+07 |
| PE(18:0p/20:4)-H | PE | (18:0p) | (20:4) | 2.17E+06 | 4.80E+06 | 1.73E+06 | 8.94E+06 | 1.34E+06 | 1.76E+06 | 3.15E+06 | 5.62E+05 | 1.60E+07 | 6.22E+06 | 1.55E+06 | 1.19E+07 |
| PE(18:0p/20:4)-H | PE | (18:0p) | (20:4) | 7.52E+06 | 5.20E+06 | 0.00E+00 | 3.13E+06 | 5.61E+06 | 4.12E+06 | 1.84E+06 | 2.93E+06 | 1.46E+07 | 8.27E+06 | 1.43E+06 | 1.43E+06 |
| PE(18:0p/20:4)-H | PE | (18:0p) | (20:4) | 8.95E+06 | 6.42E+06 | 4.29E+06 | 0.00E+00 | 1.47E+07 | 0.00E+00 | 1.10E+07 | 0.00E+00 | 1.62E+07 | 0.00E+00 | 0.00E+00 | 0.00E+00 |
| PE(18:0p/20:4)-H | PE | (18:0p) | (20:4) | 2.32E+07 | 9.21E+06 | 9.21E+06 | 1.10E+07 | 6.69E+06 | 0.00E+00 | 1.44E+07 | 2.71E+07 | 3.27E+07 | 6.81E+06 | 9.66E+06 | 4.88E+06 |
| PE(18:0p/20:4)-H | PE | (18:0p) | (20:4) | 2.95E+07 | 2.95E+06 | 1.58E+06 | 2.95E+06 | 1.08E+0  |          |          |          |          |          |          |          |

|                      |     |         |        |          |          |          |          |          |          |          |          |          |          |          |          |
|----------------------|-----|---------|--------|----------|----------|----------|----------|----------|----------|----------|----------|----------|----------|----------|----------|
| PE(24/5/18:0)-H      | PE  | (24/5)  | (18/0) | 3.04E+07 | 7.66E+06 | 2.58E+07 | 1.26E+07 | 3.73E+07 | 9.37E+06 | 1.78E+07 | 1.93E+07 | 3.33E+07 | 4.14E+07 | 1.58E+07 | 1.54E+07 |
| PE(20/1p/22:6)-H     | PE  | (20/1p) | (22/6) | 2.23E+07 | 1.80E+07 | 2.67E+07 | 2.95E+06 | 4.18E+06 | 8.64E+06 | 4.91E+06 | 5.60E+06 | 3.12E+06 | 9.65E+06 | 5.87E+06 | 1.30E+07 |
| PE(20/1p/22:6)-H     | PE  | (20/1p) | (22/6) | 2.84E+07 | 7.68E+03 | 1.39E+07 | 2.25E+04 | 1.71E+06 | 7.17E+06 | 3.16E+06 | 0.00E+00 | 0.00E+00 | 3.36E+06 | 9.78E+06 | 1.47E+07 |
| PE(25/0/18:1)-H      | PE  | (25/0)  | (18/1) | 2.15E+07 | 2.79E+07 | 1.51E+06 | 7.01E+06 | 1.25E+07 | 4.22E+06 | 1.82E+06 | 4.28E+06 | 1.82E+06 | 2.72E+06 | 1.82E+06 | 0.00E+00 |
| PE(25/0/18:1)-H      | PE  | (25/0)  | (18/1) | 1.21E+06 | 0.00E+00 | 2.08E+06 | 1.90E+05 | 2.40E+05 | 0.00E+00 | 5.44E+03 | 6.28E+03 | 3.34E+05 | 2.18E+05 | 0.00E+00 | 0.00E+00 |
| PE(24/0/20:4)-H      | PE  | (24/0)  | (20/4) | 1.05E+07 | 1.46E+07 | 5.37E+06 | 1.30E+06 | 6.80E+05 | 1.51E+06 | 4.87E+06 | 2.14E+06 | 5.82E+06 | 5.38E+06 | 3.77E+06 | 1.47E+06 |
| PE(16/0/16:0)-H      | PEt | (16/0)  | (16/0) | 0.00E+00 | 0.00E+00 | 0.00E+00 | 5.07E+06 | 8.35E+06 | 4.53E+06 | 4.99E+06 | 8.64E+06 | 2.56E+06 | 1.24E+07 | 5.94E+06 | 1.55E+06 |
| PE(16/0/18:1)-H      | PEt | (16/0)  | (18/1) | 9.21E+06 | 0.00E+00 | 5.84E+06 | 1.03E+08 | 8.06E+07 | 1.07E+08 | 1.89E+07 | 7.05E+07 | 3.41E+07 | 1.19E+08 | 1.01E+08 | 1.21E+08 |
| PE(16/0/18:2)-H      | PEt | (16/0)  | (18/2) | 2.10E+04 | 0.00E+00 | 4.21E+05 | 8.47E+06 | 5.42E+06 | 2.98E+06 | 2.85E+06 | 1.53E+07 | 3.48E+06 | 8.01E+06 | 7.29E+06 | 4.60E+06 |
| PE(16/0/18:2)-H      | PEt | (18/1)  | (18/2) | 5.45E+05 | 0.00E+00 | 0.00E+00 | 2.55E+06 | 3.08E+06 | 3.22E+05 | 2.02E+06 | 2.02E+06 | 8.43E+03 | 0.00E+00 | 4.06E+06 | 1.08E+06 |
| PE(16/0/20:4)-H      | PEt | (16/0)  | (20/4) | 0.00E+00 | 7.27E+05 | 7.04E+05 | 2.94E+06 | 5.71E+06 | 5.90E+06 | 3.93E+06 | 5.71E+06 | 3.79E+06 | 2.94E+07 | 1.03E+07 | 0.00E+00 |
| PE(18/0/19:0)-H      | PEt | (18/0)  | (19/0) | 9.57E+06 | 1.16E+07 | 9.39E+07 | 0.00E+00 | 2.36E+06 | 2.12E+08 | 1.19E+08 | 1.21E+08 | 1.03E+08 | 2.35E+08 | 2.74E+08 | 1.21E+09 |
| PE(18/1/20:4)-H      | PEt | (18/1)  | (20/4) | 1.28E+04 | 0.00E+00 | 1.96E+03 | 7.37E+06 | 3.40E+06 | 1.72E+06 | 7.04E+06 | 1.20E+07 | 5.72E+05 | 2.13E+06 | 7.24E+07 | 2.79E+06 |
| PE(40/3)-H           | PEt | (40/3)  |        | 3.21E+07 | 3.47E+07 | 1.16E+07 | 1.66E+07 | 0.00E+00 | 4.90E+06 | 8.09E+06 | 5.22E+06 | 1.56E+07 | 3.42E+06 | 3.05E+07 | 1.00E+08 |
| PE(41/6)-H           | PEt | (41/6)  |        | 0.00E+00 | 0.00E+00 | 5.03E+06 | 5.41E+06 | 3.12E+06 | 4.76E+06 | 3.31E+06 | 2.82E+06 | 1.59E+06 | 4.53E+06 | 6.89E+06 | 4.15E+06 |
| PE(42/3)-H           | PEt | (42/3)  |        | 6.83E+05 | 2.48E+03 | 4.46E+06 | 6.47E+06 | 5.71E+06 | 8.11E+06 | 7.08E+06 | 3.96E+06 | 6.22E+06 | 1.12E+07 | 4.66E+07 | 1.61E+07 |
| PE(42/4)-H           | PEt | (42/4)  |        | 1.89E+08 | 1.22E+08 | 1.17E+08 | 1.89E+08 | 2.12E+07 | 4.54E+08 | 7.70E+07 | 1.11E+08 | 1.72E+07 | 1.02E+08 | 3.83E+07 | 9.23E+07 |
| PE(42/4)-H           | PEt | (42/4)  |        | 8.01E+07 | 1.45E+08 | 3.85E+07 | 0.00E+00 | 0.00E+00 | 4.19E+08 | 6.88E+07 | 1.03E+08 | 0.00E+00 | 0.00E+00 | 1.14E+08 | 1.13E+08 |
| PE(42/4)-H           | PEt | (42/4)  |        | 3.84E+08 | 2.93E+08 | 7.48E+07 | 5.04E+08 | 2.75E+08 | 2.98E+08 | 3.36E+08 | 4.20E+08 | 3.79E+08 | 6.06E+08 | 2.85E+08 | 2.52E+08 |
| PE(42/4p)-H          | PEt | (42/4p) |        | 6.74E+08 | 4.39E+08 | 4.92E+08 | 5.73E+08 | 4.08E+08 | 6.46E+08 | 4.23E+08 | 2.79E+08 | 6.31E+08 | 7.27E+08 | 6.55E+08 | 6.68E+08 |
| PE(44/6)-H           | PEt | (44/6)  |        | 8.69E+08 | 4.04E+08 | 2.28E+09 | 3.44E+09 | 3.63E+09 | 2.04E+09 | 1.22E+09 | 1.99E+09 | 4.04E+09 | 2.69E+09 | 2.43E+09 | 2.52E+09 |
| PE(44/6)-H           | PEt | (44/6)  |        | 1.87E+09 | 1.91E+09 | 1.90E+09 | 3.04E+09 | 3.22E+09 | 1.68E+09 | 1.07E+09 | 1.79E+09 | 1.31E+09 | 2.51E+09 | 2.27E+09 | 2.03E+09 |
| PE(45/10)-H          | PEt | (45/10) |        | 1.84E+08 | 1.16E+08 | 1.38E+08 | 1.38E+07 | 1.60E+07 | 4.97E+06 | 0.00E+00 | 6.33E+06 | 4.57E+07 | 1.62E+08 | 1.68E+08 | 2.17E+08 |
| PE(45/10)-H          | PEt | (45/10) |        | 3.18E+06 | 0.00E+00 | 4.21E+06 | 4.74E+07 | 3.27E+06 | 1.22E+08 | 3.52E+05 | 1.10E+07 | 4.07E+07 | 3.27E+07 | 1.39E+08 | 1.56E+08 |
| PE(46/10)-H          | PEt | (46/10) |        | 1.18E+08 | 0.00E+00 | 1.00E+08 | 1.55E+08 | 2.28E+08 | 1.37E+08 | 8.71E+07 | 1.23E+08 | 7.97E+07 | 2.13E+08 | 1.55E+08 | 2.09E+08 |
| PE(46/8)-H           | PEt | (46/8)  |        | 9.23E+08 | 7.08E+08 | 7.87E+08 | 1.88E+09 | 2.56E+09 | 1.68E+09 | 1.00E+09 | 3.02E+09 | 2.01E+09 | 2.41E+09 | 2.14E+09 | 1.90E+09 |
| PG(29/2)-(CH3CH2)3NH | PG  | (29/2)  |        | 1.01E+05 | 5.35E+05 | 1.55E+06 | 3.89E+07 | 4.06E+07 | 4.05E+07 | 1.58E+06 | 3.96E+07 | 1.58E+06 | 4.51E+07 | 6.05E+07 | 2.08E+07 |
| PG(16/0/16:0)-H      | PG  | (16/0)  | (16/0) | 5.52E+05 | 0.00E+00 | 6.97E+03 | 5.35E+07 | 2.94E+07 | 7.71E+06 | 3.48E+05 | 5.94E+06 | 1.30E+06 | 6.13E+07 | 7.77E+07 | 5.08E+07 |
| PG(16/0/16:1)-H      | PG  | (16/0)  | (16/1) | 0.00E+00 | 3.25E+06 | 0.00E+00 | 3.25E+07 | 1.37E+07 | 4.97E+05 | 0.00E+00 | 0.00E+00 | 0.00E+00 | 0.00E+00 | 3.45E+06 | 7.17E+06 |
| PG(16/0/16:1)-H      | PG  | (16/0)  | (16/1) | 0.00E+00 | 2.36E+05 | 2.26E+07 | 0.00E+00 | 5.75E+06 | 2.28E+05 | 0.00E+00 | 0.00E+00 | 0.00E+00 | 1.03E+07 | 4.85E+06 | 2.07E+06 |
| PG(16/1/16:1)-H      | PG  | (16/1)  | (16/1) | 0.00E+00 | 1.70E+07 | 0.00E+00 | 7.65E+07 | 9.50E+07 | 4.28E+07 | 0.00E+00 | 4.67E+06 | 0.00E+00 | 9.20E+07 | 4.03E+07 | 4.53E+06 |
| PG(16/1/17:1)-H      | PG  | (16/1)  | (17/1) | 0.00E+00 | 0.00E+00 | 0.00E+00 | 9.15E+06 | 7.43E+06 | 6.10E+05 | 0.00E+00 | 0.00E+00 | 0.00E+00 | 3.80E+06 | 0.00E+00 | 0.00E+00 |
| PG(16/0/18:1)-H      | PG  | (16/0)  | (18/1) | 1.03E+07 | 2.23E+07 | 5.52E+06 | 2.59E+08 | 5.99E+07 | 4.51E+07 | 4.48E+05 | 2.28E+06 | 4.45E+06 | 1.60E+08 | 4.11E+07 | 8.01E+07 |
| PG(16/0/18:1)-H      | PG  | (16/0)  | (18/1) | 0.00E+00 | 0.00E+00 | 0.00E+00 | 2.07E+07 | 1.31E+07 | 5.44E+05 | 0.00E+00 | 0.00E+00 | 0.00E+00 | 1.68E+07 | 4.22E+05 | 1.35E+06 |
| PG(16/0/18:1)-NH4    | PG  | (16/0)  | (18/1) | 0.00E+00 | 1.89E+06 | 5.06E+05 | 5.99E+07 | 4.54E+07 | 8.19E+05 | 2.05E+05 | 4.33E+05 | 2.60E+03 | 5.07E+07 | 1.54E+06 | 0.00E+00 |
| PG(16/0/18:1)-H      | PG  | (16/0)  | (18/1) | 9.05E+08 | 9.05E+08 | 1.32E+09 | 5.25E+08 | 5.45E+08 | 4.55E+08 | 3.62E+08 | 4.63E+08 | 9.00E+08 | 1.20E+09 | 1.31E+09 | 1.31E+09 |
| PG(16/0/18:1)-H      | PG  | (16/0)  | (18/1) | 2.04E+08 | 1.46E+08 | 2.03E+08 | 1.17E+08 | 8.52E+07 | 9.52E+07 | 7.88E+07 | 5.29E+07 | 1.36E+08 | 1.36E+08 | 1.61E+08 | 1.25E+08 |
| PG(16/1/18:1)-NH4    | PG  | (16/1)  | (18/1) | 0.00E+00 | 3.02E+07 | 0.00E+00 | 3.91E+08 | 2.03E+08 | 2.49E+07 | 8.72E+05 | 1.36E+06 | 3.12E+05 | 1.96E+08 | 6.15E+07 | 1.84E+08 |
| PG(16/1/18:1)-H      | PG  | (16/1)  | (18/1) | 0.00E+00 | 5.89E+07 | 1.21E+06 | 1.34E+08 | 5.97E+08 | 9.73E+07 | 0.00E+00 | 1.17E+07 | 3.52E+05 | 2.23E+08 | 1.51E+08 | 2.61E+08 |
| PG(16/1/18:1)-H      | PG  | (16/1)  | (18/1) | 0.00E+00 | 0.00E+00 | 0.00E+00 | 2.59E+07 | 3.19E+07 | 2.14E+06 | 0.00E+00 | 6.04E+03 | 0.00E+00 | 3.84E+07 | 1.49E+07 | 2.78E+07 |
| PG(16/0/18:2)-NH4    | PG  | (16/0)  | (18/2) | 5.91E+07 | 2.38E+06 | 2.13E+07 | 8.03E+07 | 3.26E+07 | 1.01E+08 | 9.70E+06 | 2.90E+07 | 1.99E+07 | 1.29E+08 | 5.41E+07 | 1.58E+08 |
| PG(16/0/18:2)-H      | PG  | (16/0)  | (18/2) | 7.60E+07 | 1.85E+07 | 9.30E+07 | 5.38E+07 | 7.89E+06 | 1.29E+08 | 1.35E+07 | 1.71E+07 | 7.89E+06 | 1.35E+07 | 1.09E+07 | 1.13E+07 |
| PG(16/1/18:1)-H      | PG  | (16/1)  | (18/1) | 7.61E+07 | 1.85E+07 | 9.30E+07 | 5.38E+07 | 7.89E+06 | 4.48E+07 | 2.74E+07 | 7.95E+06 | 2.73E+07 | 1.24E+07 | 4.25E+07 | 3.13E+08 |
| PG(16/1/18:2)-H      | PG  | (16/1)  | (18/2) | 2.10E+07 | 1.13E+08 | 3.31E+06 | 8.97E+08 | 8.32E+08 | 2.61E+08 | 0.00E+00 | 4.28E+07 | 0.00E+00 | 5.80E+08 | 3.58E+08 | 7.01E+08 |
| PG(16/1/18:2)-NH4    | PG  | (16/1)  | (18/2) | 0.00E+00 | 0.00E+00 | 2.26E+05 | 1.53E+07 | 1.23E+07 | 3.54E+06 | 1.27E+07 | 2.92E+06 | 3.03E+06 | 7.04E+07 | 1.84E+07 | 8.76E+07 |
| PG(16/1/18:2)-H      | PG  | (16/1)  | (18/2) | 2.10E+07 | 1.78E+08 | 3.09E+06 | 9.15E+08 | 8.08E+08 | 1.71E+08 | 4.45E+05 | 3.78E+07 | 1.11E+07 | 5.11E+08 | 3.75E+08 | 5.32E+08 |
| PG(16/0/19:1)-H      | PG  | (16/0)  | (19/1) | 3.60E+07 | 1.89E+07 | 3.17E+07 | 3.31E+07 | 6.61E+07 | 2.85E+07 | 5.55E+06 | 1.94E+07 | 1.96E+07 | 5.45E+07 | 3.98E+07 | 5.23E+06 |
| PG(17/1/18:1)-H      | PG  | (17/1)  | (18/1) | 0.00E+00 | 0.00E+00 | 0.00E+00 | 1.66E+07 | 2.01E+07 | 0.00E+00 | 0.00E+00 | 0.00E+00 | 0.00E+00 | 9.72E+06 | 2.65E+06 | 1.42E+06 |
| PG(17/1/18:2)-H      | PG  | (17/1)  | (18/2) | 0.00E+00 | 0.00E+00 | 0.00E+00 | 9.53E+06 | 8.82E+06 | 8.85E+05 | 0.00E+00 | 0.00E+00 | 0.00E+00 | 5.45E+06 | 1.40E+07 | 1.20E+07 |
| PG(18/0/18:1)-H      | PG  | (18/0)  | (18/1) | 3.17E+08 | 2.11E+08 | 3.40E+08 | 4.39E+08 | 2.41E+08 | 5.66E+08 | 2.52E+08 | 2.36E+08 | 2.92E+08 | 5.78E+08 | 5.17E+08 | 7.80E+08 |
| PG(16/0/20:2)-H      | PG  | (16/0)  | (20/2) | 7.02E+07 | 9.60E+07 | 6.29E+07 | 1.91E+09 | 2.05E+09 | 4.21E+08 | 2.41E+07 | 1.14E+07 | 5.47E+07 | 1.74E+09 | 9.42E+08 | 5.35E+08 |
| PG(16/0/20:2)-H      | PG  | (16/0)  | (20/2) | 0.00E+00 | 0.00E+00 | 6.05E+08 | 0.00E+00 | 3.12E+08 | 7.22E+08 | 3.02E+07 | 1.17E+07 | 3.79E+08 | 6.02E+08 | 1.05E+09 | 1.03E+09 |
| PG(16/0/20:2)-H      | PG  | (16/0)  | (20/2) | 7.68E+08 | 5.45E+08 | 6.19E+08 | 3.40E+08 | 3.59E+08 | 1.12E+09 | 3.92E+08 | 4.16E+08 | 4.31E+08 | 4.98E+08 | 1.08E+09 | 9.96E+08 |
| PG(18/1/18:2)-H      | PG  | (18/1)  | (18/2) | 6.70E+07 | 7.67E+07 | 1.49E+07 | 1.49E+07 | 8.46E+06 | 1.14E+07 | 3.39E+07 | 8.53E+06 | 1.33E+07 | 1.33E+07 | 9.33E+06 | 5.32E+06 |
| PG(18/1/18:2)-H      | PG  | (18/1)  | (18/2) | 0.00E+00 | 2.51E+06 | 0.00E+00 | 3.73E+07 | 6.35E+07 | 1.59E+07 | 0.00E+00 | 0.00E+00 | 0.00E+00 | 6.85E+07 | 9.63E+07 | 4.48E+07 |
| PG(18/1/18:2)-NH4    | PG  | (18/1)  | (18/2) | 1.21E+07 | 8.02E+07 | 1.85E+07 | 5.19E+08 | 6.92E+08 | 1.16E+09 | 7.78E+06 | 3.55E+08 | 1.45E+06 | 6.45E+08 | 1.57E+09 | 1.73E+09 |
| PG(18/1/18:2)-H      | PG  | (18/1)  | (18/2) | 6.69E+07 | 1.07E+08 | 2.35E+07 | 1.28E+09 | 7.27E+08 | 1.33E+08 | 4.24E+07 | 8.58E+07 | 7.71E+06 | 2.51E+08 | 3.09E+08 | 8.51E+08 |
| PG(18/1/18:2)-H      | PG  | (18/1)  | (18/2) | 3.48E+05 | 6.19E+06 | 6.31E+05 | 1.45E+07 | 5.67E+07 | 1.13E+06 | 3.51E+05 | 2.31E+04 | 0.00E+00 | 3.74E+07 | 5.61E+06 | 9.96E+06 |
| PG(18/1/18:2)-NH4    | PG  | (18/1)  | (18/2) | 1.85E+07 | 8.12E+07 | 6.11E+06 | 1.03E+08 | 6.92E+08 | 4.66E+08 | 6.05E+06 | 3.87E+08 | 8.12E+07 | 3.10E+08 | 5.07E+08 | 3.74E+08 |
| PG(18/3)-H           | PG  | (18/3)  |        | 1.08E+08 | 8.30E+07 | 5.95E+07 | 3.55E+07 | 2.42E+07 | 4.69E+07 | 2.25E+07 | 4.88E+07 | 5.21E+07 | 5.27E+07 | 7.42E+07 | 6.67E+07 |
| PG(18/4)-NH4         | PG  | (18/4)  |        | 0.00E+00 | 2.50E+08 | 2.67E+08 | 0.00E+00 | 2.67E+08 | 0.00E+00 | 1.98E+08 | 4.01E+08 | 2.18E+08 | 3.22E+08 | 3.68E+08 | 3.68E+08 |
| PG(18/2/18:2)-H      | PG  | (18/2)  | (18/2) | 2.78E+07 | 0.00E+00 | 4.18E+07 | 1.0      |          |          |          |          |          |          |          |          |

|                   |    |         |        |          |          |          |          |          |          |          |          |          |          |          |          |
|-------------------|----|---------|--------|----------|----------|----------|----------|----------|----------|----------|----------|----------|----------|----------|----------|
| PI(16/0/16/0)+NH4 | PI | (16/0)  | (16/0) | 7.48E+08 | 4.83E+08 | 8.27E+08 | 7.44E+07 | 3.05E+08 | 2.34E+07 | 3.41E+08 | 7.31E+07 | 6.82E+08 | 3.74E+08 | 1.02E+08 | 5.43E+07 |
| PI(16/0/16/0)-H   | PI | (16/0)  | (16/0) | 4.61E+08 | 2.85E+08 | 6.00E+08 | 1.44E+08 | 3.25E+07 | 1.65E+08 | 1.33E+07 | 7.29E+06 | 3.12E+07 | 6.89E+07 | 6.78E+08 | 1.21E+08 |
| PI(16/0/16/0)+H   | PI | (16/0)  | (16/0) | 3.83E+08 | 0.00E+00 | 0.00E+00 | 1.31E+08 | 4.16E+06 | 1.71E+07 | 5.23E+06 | 5.13E+06 | 0.00E+00 | 0.00E+00 | 6.89E+07 | 4.44E+07 |
| PI(16/0/16/0)-H   | PI | (16/0)  | (16/0) | 1.54E+08 | 1.55E+07 | 1.06E+08 | 1.56E+07 | 1.09E+07 | 7.09E+07 | 1.06E+07 | 1.06E+07 | 1.06E+07 | 1.06E+07 | 1.06E+07 | 1.06E+07 |
| PI(16/06/16/0)-H  | PI | (16/06) | (16/0) | 5.06E+05 | 2.85E+05 | 5.89E+07 | 1.26E+08 | 9.58E+06 | 5.62E+07 | 5.53E+06 | 8.59E+06 | 1.51E+07 | 1.68E+08 | 7.78E+07 | 4.43E+07 |
| PI(16/0/16/1)-H   | PI | (16/0)  | (16/1) | 2.10E+08 | 2.09E+08 | 2.28E+08 | 2.24E+08 | 1.48E+07 | 3.93E+08 | 1.30E+07 | 4.95E+07 | 0.00E+00 | 2.48E+08 | 5.82E+08 | 4.93E+08 |
| PI(16/0/16/1)-H   | PI | (16/0)  | (16/1) | 2.10E+08 | 2.09E+08 | 0.00E+00 | 0.00E+00 | 2.77E+07 | 0.00E+00 | 2.28E+06 | 8.84E+05 | 0.00E+00 | 0.00E+00 | 0.00E+00 | 0.00E+00 |
| PI(16/1/16/1)-H   | PI | (16/1)  | (16/1) | 6.83E+05 | 2.79E+05 | 0.00E+00 | 9.80E+05 | 1.00E+04 | 7.17E+06 | 1.71E+03 | 2.34E+05 | 0.00E+00 | 7.00E+06 | 1.84E+07 | 1.29E+07 |
| PI(16/0/17/1)-H   | PI | (16/0)  | (17/1) | 4.71E+06 | 4.49E+06 | 3.88E+07 | 2.71E+06 | 5.70E+05 | 1.45E+06 | 1.97E+05 | 2.38E+05 | 2.34E+05 | 6.29E+06 | 1.00E+07 | 2.16E+07 |
| PI(18/0/16/0)-H   | PI | (18/0)  | (16/0) | 4.17E+07 | 1.08E+08 | 5.33E+07 | 8.76E+07 | 7.66E+06 | 2.14E+08 | 2.56E+07 | 2.84E+07 | 2.84E+07 | 3.44E+08 | 2.17E+08 | 3.39E+08 |
| PI(18/0/16/0)+NH4 | PI | (18/0)  | (16/0) | 1.79E+06 | 1.89E+06 | 1.38E+06 | 1.11E+06 | 2.16E+06 | 2.53E+06 | 5.55E+04 | 2.68E+06 | 1.53E+07 | 9.88E+06 | 1.93E+07 | 1.25E+07 |
| PI(18/0/16/0)-H   | PI | (18/0)  | (16/0) | 2.54E+07 | 1.86E+07 | 2.90E+07 | 5.71E+07 | 2.75E+06 | 4.87E+06 | 2.25E+06 | 3.21E+06 | 1.29E+07 | 8.11E+07 | 1.77E+09 | 3.95E+07 |
| PI(18/0/16/0)-H   | PI | (18/0)  | (16/0) | 1.48E+05 | 1.29E+06 | 0.00E+00 | 2.23E+05 | 1.79E+06 | 4.68E+05 | 1.28E+06 | 1.57E+05 | 3.66E+05 | 1.14E+06 | 2.85E+05 | 7.75E+04 |
| PI(18/0/16/0)-H   | PI | (18/0)  | (16/0) | 3.19E+06 | 5.49E+06 | 3.09E+06 | 3.85E+06 | 1.79E+06 | 5.73E+06 | 1.63E+06 | 2.73E+06 | 1.69E+06 | 1.84E+07 | 5.14E+07 | 3.95E+07 |
| PI(18/06/16/0)-H  | PI | (18/06) | (16/0) | 0.00E+00 | 0.00E+00 | 4.82E+05 | 3.25E+07 | 1.25E+05 | 1.82E+06 | 0.00E+00 | 3.51E+05 | 1.00E+00 | 6.20E+06 | 7.77E+05 | 0.00E+00 |
| PI(18/06/16/0)-H  | PI | (18/06) | (16/0) | 1.20E+05 | 0.00E+00 | 6.19E+05 | 1.62E+06 | 4.28E+03 | 0.00E+00 | 0.00E+00 | 0.00E+00 | 0.00E+00 | 7.23E+05 | 0.00E+00 | 0.00E+00 |
| PI(18/0p/16/0)-H  | PI | (18/0p) | (16/0) | 1.13E+08 | 5.20E+07 | 1.34E+08 | 1.77E+08 | 6.64E+06 | 1.52E+08 | 2.54E+07 | 1.58E+07 | 1.92E+06 | 3.08E+08 | 1.51E+08 | 1.87E+08 |
| PI(18/0p/16/0)-H  | PI | (18/0p) | (16/0) | 4.06E+06 | 4.19E+07 | 1.63E+08 | 1.73E+08 | 2.15E+06 | 2.95E+07 | 3.12E+06 | 1.01E+06 | 3.84E+05 | 8.94E+07 | 2.82E+06 | 3.05E+06 |
| PI(34/1)-H        | PI | (34/1)  |        | 9.61E+04 | 5.17E+05 | 0.00E+00 | 4.25E+06 | 4.04E+06 | 1.11E+07 | 4.70E+06 | 1.90E+06 | 1.58E+06 | 1.02E+07 | 6.30E+06 | 9.48E+07 |
| PI(16/0/18/1)-H   | PI | (16/0)  | (18/1) | 1.19E+09 | 8.44E+08 | 1.61E+09 | 7.22E+08 | 4.52E+08 | 1.28E+09 | 2.28E+08 | 3.13E+08 | 2.78E+07 | 9.96E+08 | 1.41E+09 | 2.05E+09 |
| PI(16/0/18/1)+H   | PI | (16/0)  | (18/1) | 4.10E+08 | 7.49E+08 | 8.63E+08 | 6.77E+08 | 1.82E+07 | 7.84E+08 | 9.93E+06 | 1.48E+07 | 4.20E+07 | 2.25E+08 | 3.44E+08 | 9.59E+08 |
| PI(16/0/18/1)-H   | PI | (16/0)  | (18/1) | 2.89E+07 | 1.83E+08 | 2.27E+08 | 1.77E+08 | 1.08E+08 | 7.08E+08 | 0.00E+00 | 2.24E+08 | 1.79E+08 | 1.77E+08 | 1.15E+09 | 6.74E+08 |
| PI(16/0/18/1)+NH4 | PI | (16/0)  | (18/1) | 1.58E+08 | 3.33E+08 | 1.48E+08 | 0.00E+00 | 0.00E+00 | 0.00E+00 | 5.37E+06 | 1.41E+07 | 2.25E+08 | 9.90E+06 | 0.00E+00 | 0.00E+00 |
| PI(16/0/18/1)-H   | PI | (16/0)  | (18/1) | 4.23E+06 | 2.27E+08 | 0.00E+00 | 7.63E+06 | 1.83E+07 | 2.04E+07 | 6.69E+07 | 2.89E+07 | 5.34E+07 | 2.74E+07 | 1.22E+07 | 9.26E+07 |
| PI(18/0/16/1)-H   | PI | (18/0)  | (16/1) | 2.74E+05 | 6.43E+05 | 1.70E+06 | 2.23E+05 | 3.47E+05 | 9.66E+05 | 4.99E+05 | 4.19E+05 | 1.29E+06 | 7.75E+05 | 3.40E+06 | 1.97E+06 |
| PI(18/0/16/1)-H   | PI | (18/0)  | (16/1) | 1.46E+07 | 5.78E+07 | 3.85E+06 | 6.18E+06 | 4.69E+06 | 5.45E+06 | 3.70E+06 | 5.64E+06 | 0.00E+00 | 3.70E+06 | 7.84E+07 | 9.56E+06 |
| PI(18/0p/16/1)-H  | PI | (18/0p) | (16/1) | 2.32E+05 | 2.59E+05 | 6.31E+05 | 4.66E+06 | 6.01E+05 | 3.20E+06 | 1.27E+06 | 3.61E+06 | 1.84E+06 | 9.92E+05 | 5.36E+06 | 3.85E+06 |
| PI(16/0/18/2)-H   | PI | (16/0)  | (18/2) | 8.60E+08 | 5.78E+08 | 8.37E+08 | 5.99E+08 | 2.10E+08 | 1.25E+09 | 1.05E+08 | 1.35E+08 | 1.79E+08 | 8.29E+08 | 1.76E+09 | 1.96E+09 |
| PI(16/0/18/2)+NH4 | PI | (16/0)  | (18/2) | 5.57E+06 | 5.13E+07 | 4.12E+07 | 5.79E+08 | 1.05E+09 | 6.09E+07 | 4.32E+07 | 8.90E+07 | 9.00E+07 | 7.95E+08 | 0.00E+00 | 0.00E+00 |
| PI(16/0/18/2)-H   | PI | (16/0)  | (18/2) | 3.68E+08 | 1.50E+08 | 3.22E+08 | 2.77E+08 | 1.10E+07 | 0.00E+00 | 2.88E+06 | 1.97E+06 | 1.39E+06 | 5.32E+08 | 7.41E+08 | 1.20E+09 |
| PI(16/1/18/2)-H   | PI | (16/1)  | (18/2) | 0.00E+00 | 0.00E+00 | 5.10E+03 | 3.94E+06 | 6.64E+05 | 1.02E+07 | 0.00E+00 | 8.65E+03 | 0.00E+00 | 2.67E+06 | 1.17E+07 | 2.28E+07 |
| PI(16/0/18/3)-H   | PI | (16/0)  | (18/3) | 9.05E+05 | 1.75E+06 | 1.78E+06 | 3.18E+06 | 5.01E+05 | 4.89E+06 | 0.00E+00 | 1.30E+05 | 0.00E+00 | 9.28E+05 | 6.89E+06 | 2.32E+07 |
| PI(14/0/20/4)-H   | PI | (14/0)  | (20/4) | 0.00E+00 | 0.00E+00 | 0.00E+00 | 0.00E+00 | 2.20E+05 | 2.47E+06 | 0.00E+00 | 0.00E+00 | 0.00E+00 | 6.09E+05 | 4.87E+06 | 6.00E+06 |
| PI(17/0/18/1)-H   | PI | (17/0)  | (18/1) | 1.31E+07 | 3.93E+06 | 3.89E+07 | 5.35E+07 | 3.51E+06 | 3.90E+06 | 0.00E+00 | 5.07E+06 | 3.62E+05 | 2.80E+06 | 3.95E+06 | 3.25E+07 |
| PI(17/0/18/2)-H   | PI | (17/0)  | (18/2) | 1.15E+06 | 8.73E+05 | 3.21E+06 | 3.91E+06 | 8.83E+05 | 2.10E+06 | 2.58E+05 | 2.99E+05 | 2.69E+05 | 0.00E+00 | 0.00E+00 | 2.61E+06 |
| PI(18/0/18/0)-H   | PI | (18/0)  | (18/0) | 5.49E+05 | 6.63E+05 | 1.26E+05 | 1.19E+06 | 4.53E+05 | 2.16E+06 | 0.00E+00 | 6.86E+05 | 0.00E+00 | 1.54E+06 | 4.54E+06 | 3.08E+06 |
| PI(18/0/18/0)-H   | PI | (18/0)  | (18/0) | 2.78E+06 | 2.21E+06 | 1.38E+06 | 6.20E+06 | 4.09E+05 | 1.19E+07 | 2.11E+05 | 6.05E+05 | 5.85E+06 | 6.35E+07 | 3.28E+07 | 0.00E+00 |
| PI(18/0/18/1)-H   | PI | (18/0)  | (18/1) | 3.70E+08 | 4.61E+08 | 5.97E+08 | 5.52E+08 | 2.18E+08 | 9.62E+08 | 5.64E+07 | 2.29E+07 | 4.57E+07 | 4.55E+08 | 8.89E+08 | 1.18E+09 |
| PI(18/0/18/1)+NH4 | PI | (18/0)  | (18/1) | 1.02E+08 | 7.90E+06 | 1.39E+08 | 1.07E+08 | 2.46E+07 | 1.19E+08 | 1.42E+07 | 1.86E+07 | 1.51E+07 | 1.42E+08 | 2.24E+08 | 8.46E+07 |
| PI(18/0/18/1)-H   | PI | (18/0)  | (18/1) | 5.41E+07 | 4.65E+07 | 5.84E+08 | 6.46E+08 | 2.42E+07 | 9.62E+08 | 1.16E+07 | 3.14E+07 | 3.14E+07 | 4.57E+07 | 1.47E+08 | 7.89E+06 |
| PI(18/0/18/1)+NH4 | PI | (18/0)  | (18/1) | 1.22E+08 | 9.15E+07 | 6.30E+07 | 4.95E+07 | 6.84E+06 | 8.00E+06 | 2.42E+06 | 3.39E+07 | 1.62E+07 | 4.00E+07 | 0.00E+00 | 5.20E+07 |
| PI(18/0/18/1)-H   | PI | (18/0)  | (18/1) | 1.20E+08 | 1.00E+08 | 0.00E+00 | 1.40E+08 | 0.00E+00 | 0.00E+00 | 1.97E+07 | 1.27E+07 | 2.11E+07 | 1.29E+08 | 6.88E+07 | 3.32E+07 |
| PI(18/0/18/1)+NH4 | PI | (18/0)  | (18/1) | 1.34E+08 | 3.61E+07 | 6.43E+06 | 2.14E+06 | 0.00E+00 | 3.81E+04 | 1.15E+06 | 1.02E+07 | 1.27E+06 | 2.43E+06 | 4.92E+06 | 0.00E+00 |
| PI(18/0/18/1)-H   | PI | (18/0)  | (18/1) | 7.60E+06 | 3.93E+06 | 0.00E+00 | 2.13E+07 | 1.89E+05 | 3.22E+06 | 9.01E+05 | 2.60E+06 | 1.50E+06 | 2.43E+06 | 5.73E+06 | 1.85E+06 |
| PI(18/0/18/1)-H   | PI | (18/0)  | (18/1) | 7.01E+07 | 5.82E+07 | 3.73E+07 | 7.13E+06 | 2.18E+06 | 7.13E+06 | 2.62E+06 | 3.91E+06 | 1.47E+06 | 3.06E+07 | 4.35E+07 | 1.87E+07 |
| PI(18/0p/18/1)-H  | PI | (18/0p) | (18/1) | 2.22E+06 | 3.83E+06 | 1.50E+06 | 1.38E+06 | 3.97E+05 | 5.12E+06 | 5.67E+06 | 1.38E+06 | 1.15E+06 | 4.60E+06 | 2.30E+06 | 4.37E+06 |
| PI(18/1/18/1)+NH4 | PI | (18/1)  | (18/1) | 2.14E+06 | 4.23E+06 | 5.22E+06 | 5.87E+06 | 1.86E+07 | 4.02E+07 | 0.00E+00 | 2.86E+06 | 3.81E+06 | 1.64E+07 | 1.51E+08 | 1.03E+07 |
| PI(18/1/18/1)-H   | PI | (18/1)  | (18/1) | 1.06E+08 | 1.37E+07 | 1.37E+07 | 1.45E+08 | 1.37E+07 | 4.09E+08 | 1.17E+08 | 2.16E+08 | 4.09E+08 | 5.00E+08 | 6.46E+08 | 6.46E+08 |
| PI(18/1/18/1)-H   | PI | (18/1)  | (18/1) | 5.40E+07 | 2.23E+07 | 1.38E+08 | 1.44E+08 | 1.85E+08 | 2.24E+08 | 8.31E+05 | 7.35E+05 | 4.00E+07 | 4.77E+07 | 4.53E+08 | 3.70E+07 |
| PI(18/1/18/1)+H   | PI | (18/1)  | (18/1) | 0.00E+00 | 1.62E+06 | 1.47E+06 | 1.51E+04 | 3.27E+04 | 1.24E+07 | 9.37E+05 | 0.00E+00 | 0.00E+00 | 2.35E+04 | 3.35E+06 | 2.64E+06 |
| PI(18/0/18/2)-H   | PI | (18/0)  | (18/2) | 3.95E+08 | 3.11E+08 | 3.24E+08 | 1.90E+08 | 1.98E+08 | 6.64E+08 | 1.04E+08 | 3.77E+07 | 1.65E+08 | 4.19E+08 | 5.95E+08 | 7.64E+08 |
| PI(18/0/18/2)+NH4 | PI | (18/0)  | (18/2) | 1.01E+08 | 3.06E+08 | 7.69E+07 | 9.89E+07 | 1.54E+08 | 2.25E+08 | 8.88E+06 | 1.39E+07 | 8.36E+06 | 8.20E+07 | 2.49E+08 | 3.50E+07 |
| PI(18/0/18/2)-H   | PI | (18/0)  | (18/2) | 4.75E+08 | 2.91E+08 | 2.93E+08 | 2.91E+08 | 1.97E+08 | 3.99E+08 | 9.88E+07 | 2.04E+08 | 1.73E+08 | 6.20E+08 | 6.43E+08 | 7.91E+08 |
| PI(16/0/20/3)-H   | PI | (16/0)  | (20/3) | 0.00E+00 | 0.00E+00 | 0.00E+00 | 0.00E+00 | 4.36E+08 | 0.00E+00 | 0.00E+00 | 2.98E+08 | 1.00E+00 | 0.00E+00 | 0.00E+00 | 0.00E+00 |
| PI(16/0/20/3)+H   | PI | (16/0)  | (20/3) | 6.96E+05 | 6.13E+05 | 3.76E+05 | 3.14E+07 | 3.69E+06 | 4.94E+07 | 0.00E+00 | 3.10E+06 | 4.06E+05 | 2.08E+07 | 4.92E+07 | 1.12E+08 |
| PI(16/0/20/3)+NH4 | PI | (16/0)  | (20/3) | 1.43E+07 | 2.37E+08 | 1.17E+08 | 2.78E+08 | 0.00E+00 | 4.19E+08 | 1.12E+07 | 7.28E+07 | 4.31E+08 | 4.40E+08 | 5.42E+08 | 5.42E+08 |
| PI(16/0/20/3)-H   | PI | (16/0)  | (20/3) | 4.84E+08 | 3.45E+08 | 4.72E+08 | 4.55E+08 | 0.00E+00 | 8.26E+08 | 1.00E+08 | 1.10E+08 | 3.28E+07 | 1.34E+08 | 6.29E+08 | 7.24E+08 |
| PI(16/0/20/3)+H   | PI | (16/0)  | (20/3) | 2.61E+08 | 2.53E+08 | 1.84E+08 | 2.15E+08 | 3.59E+07 | 6.04E+08 | 5.61E+06 | 5.49E+07 | 1.35E+08 | 4.62E+08 | 4.58E+08 | 5.29E+08 |
| PI(16/0/20/3)+H   | PI | (16/0)  | (20/3) | 1.27E+07 | 5.14E+06 | 3.20E+07 | 2.71E+07 | 7.55E+05 | 1.33E+08 | 0.00E+00 | 2.80E+06 | 9.56E+05 | 2.09E+07 | 4.92E+07 | 3.14E+07 |
| PI(18/2/18/2)-H   | PI | (18/2)  | (18/2) | 1.45E+05 | 1.38E+06 | 1.24E+06 | 9.78E+06 | 6.33E+06 | 0.00E+00 | 1.23E+06 | 6.37E+05 | 0.00E+00 | 9.36E+06 | 9.25E+06 | 0.00E+00 |
| PI(16/0/20/4)-H   | PI | (16/0)  | (20/4) | 7.38E+08 | 4.77E+08 | 7.38E+08 | 5.81E+08 | 1.47E+09 | 2.67E+09 | 5.21E+08 | 5.21E+08 | 5.21E+08 |          |          |          |



|                  |    |         |          |          |          |          |          |          |          |          |          |          |          |          |
|------------------|----|---------|----------|----------|----------|----------|----------|----------|----------|----------|----------|----------|----------|----------|
| PS(18.0/20.4)+H  | PS | (18.0)  | (20.4)   | 0.00E+00 | 0.00E+00 | 5.01E+05 | 1.08E+06 | 0.00E+00 | 9.57E+05 | 3.82E+06 | 6.88E+05 | 2.92E+06 | 2.61E+06 | 5.19E+06 |
| PS(18.0/20.4)+H  | PS | (18.0)  | (20.4)   | 0.00E+00 | 0.00E+00 | 2.26E+05 | 5.80E+06 | 0.00E+00 | 1.04E+07 | 4.74E+06 | 8.62E+05 | 8.38E+06 | 7.08E+06 | 1.15E+07 |
| PS(18.0/20.4)+H  | PS | (18.0)  | (20.4)   | 0.00E+00 | 0.00E+00 | 7.43E+05 | 1.29E+06 | 3.70E+06 | 2.18E+06 | 5.53E+06 | 3.34E+06 | 2.11E+06 | 5.55E+06 | 9.68E+06 |
| PS(18.0/20.4)+H  | PS | (18.0)  | (20.4)   | 0.00E+00 | 0.00E+00 | 2.34E+05 | 6.23E+05 | 4.09E+06 | 1.17E+06 | 1.17E+06 | 1.19E+06 | 1.04E+07 | 1.19E+07 | 4.77E+07 |
| PS(18.0/20.4)+H  | PS | (18.0)  | (20.4)   | 0.00E+00 | 0.00E+00 | 9.41E+05 | 7.36E+06 | 2.31E+06 | 3.76E+06 | 2.92E+06 | 1.40E+07 | 2.99E+06 | 5.00E+06 | 1.01E+07 |
| PS(18.0/20.4)+H  | PS | (18.0)  | (20.4)   | 0.00E+00 | 0.00E+00 | 3.40E+06 | 1.09E+07 | 5.61E+06 | 2.10E+07 | 1.44E+06 | 9.78E+06 | 2.34E+06 | 3.85E+06 | 2.51E+08 |
| PS(18.0/20.4)+H  | PS | (18.0)  | (20.4)   | 0.00E+00 | 0.00E+00 | 2.06E+06 | 6.09E+06 | 2.24E+06 | 8.22E+06 | 1.01E+07 | 1.25E+07 | 6.95E+06 | 4.29E+06 | 2.19E+06 |
| PS(18.0/20.4)+H  | PS | (18.0)  | (20.4)   | 5.96E+04 | 0.00E+00 | 1.98E+06 | 1.76E+07 | 3.16E+06 | 3.36E+07 | 1.24E+07 | 7.19E+06 | 1.28E+07 | 1.54E+06 | 9.53E+06 |
| PS(18.0/20.4)+H  | PS | (18.0)  | (20.4)   | 0.00E+00 | 0.00E+00 | 1.18E+06 | 2.39E+06 | 5.23E+06 | 2.98E+08 | 1.39E+08 | 1.71E+06 | 6.24E+06 | 3.24E+07 | 1.79E+06 |
| PS(18.0/20.4)+H  | PS | (18.0)  | (20.4)   | 0.00E+00 | 0.00E+00 | 1.85E+07 | 9.41E+06 | 3.25E+06 | 2.46E+07 | 5.13E+07 | 1.11E+07 | 2.12E+07 | 5.13E+07 | 1.28E+08 |
| PS(18.0/20.4)+H  | PS | (18.0)  | (20.4)   | 0.00E+00 | 0.00E+00 | 7.84E+06 | 1.02E+07 | 5.84E+06 | 5.97E+06 | 4.35E+06 | 3.14E+06 | 2.38E+07 | 2.43E+07 | 3.97E+06 |
| PS(18.0/20.4)+H  | PS | (18.0)  | (20.4)   | 8.70E+06 | 0.00E+00 | 0.00E+00 | 1.19E+07 | 5.82E+06 | 2.24E+08 | 4.99E+07 | 3.48E+07 | 6.51E+06 | 2.89E+08 | 5.94E+07 |
| PS(18.0/20.4)+H  | PS | (18.0)  | (20.4)   | 0.00E+00 | 0.00E+00 | 9.32E+06 | 4.26E+06 | 7.19E+06 | 1.81E+08 | 4.52E+07 | 1.13E+07 | 1.49E+07 | 3.57E+07 | 6.03E+06 |
| PS(18.0/20.4)+H  | PS | (18.0)  | (20.4)   | 8.70E+06 | 0.00E+00 | 3.41E+07 | 8.38E+07 | 8.69E+07 | 0.00E+00 | 1.04E+08 | 5.71E+07 | 3.50E+07 | 0.00E+00 | 0.00E+00 |
| PS(18.0/20.4)+H  | PS | (18.0)  | (20.4)   | 0.00E+00 | 0.00E+00 | 3.93E+06 | 8.93E+06 | 4.58E+06 | 5.25E+07 | 8.99E+07 | 2.60E+06 | 4.28E+06 | 3.69E+07 | 1.77E+07 |
| PS(18.0/20.4)+H  | PS | (18.0)  | (20.4)   | 7.62E+07 | 2.20E+04 | 5.58E+07 | 8.04E+08 | 7.09E+07 | 6.68E+08 | 5.43E+08 | 6.29E+08 | 9.88E+07 | 4.89E+08 | 6.13E+08 |
| PS(18.0/20.4)+H  | PS | (18.0)  | (20.4)   | 0.00E+00 | 0.00E+00 | 7.30E+06 | 3.44E+07 | 2.61E+07 | 1.15E+08 | 1.77E+07 | 4.46E+06 | 1.38E+07 | 8.85E+07 | 3.16E+07 |
| PS(18.0/20.4)+H  | PS | (18.0)  | (20.4)   | 9.64E+06 | 1.04E+07 | 4.44E+06 | 8.04E+08 | 1.69E+07 | 2.88E+07 | 5.78E+08 | 6.49E+08 | 1.08E+07 | 1.08E+07 | 3.34E+07 |
| PS(18.0/20.4)+H  | PS | (18.0)  | (20.4)   | 0.00E+00 | 4.26E+05 | 8.94E+06 | 2.11E+07 | 6.25E+06 | 5.62E+06 | 4.55E+06 | 1.01E+06 | 3.68E+06 | 8.93E+07 | 1.24E+08 |
| PS(18.0/20.4)+H  | PS | (18.0)  | (20.4)   | 1.03E+04 | 2.50E+06 | 5.65E+06 | 0.00E+00 | 6.36E+06 | 3.72E+07 | 1.23E+07 | 0.00E+00 | 2.65E+06 | 4.54E+07 | 5.76E+06 |
| PS(18.0/20.4)+H  | PS | (18.0)  | (20.4)   | 0.00E+00 | 1.42E+06 | 2.28E+06 | 1.24E+06 | 5.06E+06 | 4.14E+06 | 1.48E+06 | 1.30E+06 | 1.60E+06 | 2.91E+06 | 3.56E+06 |
| PS(18.0/20.4)+H  | PS | (18.0)  | (20.4)   | 6.88E+05 | 2.34E+07 | 2.63E+06 | 1.89E+08 | 1.11E+08 | 8.81E+07 | 1.85E+08 | 1.31E+08 | 1.55E+08 | 1.18E+08 | 2.40E+08 |
| PS(18.0/20.4)+H  | PS | (18.0)  | (20.4)   | 0.00E+00 | 3.14E+06 | 2.36E+06 | 1.70E+07 | 3.92E+07 | 1.79E+08 | 3.04E+07 | 9.20E+06 | 2.30E+07 | 6.76E+07 | 1.80E+08 |
| PS(18.0/20.4)+H  | PS | (18.0)  | (20.4)   | 8.67E+06 | 4.73E+07 | 9.03E+07 | 3.37E+08 | 4.60E+08 | 1.49E+09 | 3.89E+08 | 4.07E+08 | 5.95E+08 | 1.48E+08 | 1.41E+08 |
| PS(18.0/20.4)+H  | PS | (18.0)  | (20.4)   | 0.00E+00 | 3.09E+06 | 2.15E+06 | 1.03E+07 | 7.06E+06 | 8.28E+06 | 8.58E+06 | 2.54E+06 | 6.87E+06 | 5.43E+06 | 5.13E+07 |
| PS(18.0/20.4)+H  | PS | (18.0)  | (20.4)   | 8.42E+06 | 9.90E+07 | 3.22E+07 | 3.37E+08 | 9.44E+07 | 2.41E+08 | 9.87E+07 | 3.87E+08 | 6.41E+07 | 0.00E+00 | 3.40E+07 |
| PS(18.0/20.4)+H  | PS | (18.0)  | (20.4)   | 0.00E+00 | 5.36E+06 | 9.84E+06 | 9.89E+06 | 3.08E+06 | 9.47E+06 | 2.77E+06 | 8.81E+06 | 6.68E+06 | 8.90E+06 | 2.12E+08 |
| PS(18.0/20.4)+H  | PS | (18.0)  | (20.4)   | 0.00E+00 | 2.03E+07 | 3.61E+06 | 5.01E+06 | 3.03E+08 | 3.27E+08 | 1.24E+08 | 9.08E+07 | 1.24E+07 | 3.61E+07 | 2.27E+07 |
| PS(18.0/20.4)+H  | PS | (18.0)  | (20.4)   | 0.00E+00 | 6.00E+06 | 1.15E+06 | 4.22E+06 | 2.35E+06 | 1.30E+06 | 4.05E+06 | 2.43E+06 | 4.22E+06 | 2.30E+06 | 4.05E+06 |
| PS(18.0/20.4)+H  | PS | (18.0)  | (20.4)   | 0.00E+00 | 9.23E+06 | 1.82E+07 | 5.06E+06 | 1.71E+07 | 7.97E+08 | 9.05E+06 | 3.26E+07 | 1.24E+07 | 7.76E+06 | 1.25E+07 |
| PS(18.0/20.4)+H  | PS | (18.0)  | (20.4)   | 1.24E+03 | 1.12E+06 | 3.19E+06 | 3.21E+06 | 7.14E+06 | 4.97E+07 | 1.40E+07 | 9.84E+06 | 5.02E+06 | 7.72E+06 | 4.48E+07 |
| PS(18.0/20.4)+H  | PS | (18.0)  | (20.4)   | 2.13E+05 | 1.06E+06 | 2.23E+08 | 2.84E+06 | 7.10E+06 | 7.20E+07 | 4.88E+06 | 1.63E+07 | 1.15E+07 | 1.32E+08 | 2.48E+08 |
| PS(18.0/20.4)+H  | PS | (18.0)  | (20.4)   | 1.03E+07 | 0.00E+00 | 1.59E+08 | 1.74E+08 | 3.70E+07 | 2.52E+08 | 1.14E+07 | 3.76E+07 | 3.29E+07 | 1.34E+08 | 2.55E+08 |
| PS(18.0/20.4)+H  | PS | (18.0)  | (20.4)   | 6.57E+03 | 1.09E+08 | 0.00E+00 | 1.34E+08 | 4.12E+07 | 1.60E+08 | 8.91E+07 | 1.08E+07 | 1.72E+07 | 0.00E+00 | 4.03E+07 |
| PS(18.0/20.4)+H  | PS | (18.0)  | (20.4)   | 3.62E+07 | 1.78E+07 | 1.15E+07 | 2.54E+07 | 3.48E+07 | 1.55E+08 | 1.21E+07 | 3.07E+07 | 5.79E+06 | 1.71E+07 | 8.69E+07 |
| PS(18.0/20.4)+H  | PS | (18.0)  | (20.4)   | 0.00E+00 | 3.11E+05 | 0.00E+00 | 0.00E+00 | 4.70E+06 | 2.10E+07 | 1.11E+06 | 9.47E+05 | 3.80E+05 | 5.55E+05 | 0.00E+00 |
| PS(18.0/20.4)+H  | PS | (18.0)  | (20.4)   | 0.00E+00 | 7.45E+05 | 6.40E+05 | 2.21E+05 | 1.41E+06 | 0.00E+00 | 3.83E+06 | 1.83E+05 | 1.56E+06 | 4.85E+05 | 9.01E+05 |
| PS(18.0/20.4)+H  | PS | (18.0)  | (20.4)   | 1.92E+06 | 2.05E+06 | 1.79E+06 | 9.77E+04 | 1.04E+07 | 0.00E+00 | 8.02E+05 | 3.06E+06 | 3.38E+06 | 0.00E+00 | 0.00E+00 |
| PS(18.0/20.4)+H  | PS | (18.0)  | (20.4)   | 1.95E+03 | 6.69E+07 | 4.84E+07 | 1.39E+08 | 2.80E+08 | 4.76E+08 | 2.25E+08 | 1.60E+08 | 2.83E+08 | 2.76E+08 | 4.65E+08 |
| PS(18.0/20.4)+H  | PS | (18.0)  | (20.4)   | 1.14E+05 | 9.21E+07 | 6.47E+05 | 1.90E+08 | 1.75E+08 | 1.75E+08 | 1.57E+08 | 8.48E+07 | 9.91E+07 | 1.19E+08 | 1.84E+08 |
| PS(18.0/20.4)+H  | PS | (18.0)  | (20.4)   | 0.00E+00 | 1.13E+05 | 1.26E+05 | 9.40E+04 | 3.16E+05 | 8.33E+05 | 2.79E+05 | 2.64E+05 | 1.22E+05 | 0.00E+00 | 1.01E+06 |
| PS(18.0p/20.4)+H | PS | (18.0p) | (20.4)+H | 5.31E+07 | 0.00E+00 | 0.00E+00 | 5.09E+06 | 4.79E+06 | 5.47E+06 | 5.47E+06 | 2.14E+06 | 3.35E+06 | 3.77E+06 | 5.13E+06 |
| PS(38-5p)-H      | PS | (38-5p) |          | 0.00E+00 | 6.65E+05 | 6.92E+05 | 1.35E+07 | 0.00E+00 | 4.71E+06 | 6.34E+05 | 3.01E+06 | 9.30E+05 | 1.65E+06 | 3.43E+06 |
| PS(38-6)-H       | PS | (38-6)  |          | 0.00E+00 | 0.00E+00 | 0.00E+00 | 0.00E+00 | 9.48E+04 | 7.62E+04 | 2.54E+05 | 0.00E+00 | 0.00E+00 | 0.00E+00 | 2.18E+06 |
| PS(38-6)-H       | PS | (38-6)  |          | 0.00E+00 | 0.00E+00 | 0.00E+00 | 0.00E+00 | 5.42E+04 | 2.02E+02 | 2.81E+05 | 0.00E+00 | 4.94E+04 | 0.00E+00 | 5.43E+05 |
| PS(16.0/22.6)-H  | PS | (16.0)  | (22.6)   | 0.00E+00 | 0.00E+00 | 0.00E+00 | 7.40E+04 | 5.89E+05 | 1.97E+03 | 1.62E+05 | 0.00E+00 | 1.55E+05 | 0.00E+00 | 1.51E+03 |
| PS(16.0/22.6)-H  | PS | (16.0)  | (22.6)   | 0.00E+00 | 0.00E+00 | 0.00E+00 | 7.63E+04 | 1.01E+05 | 0.00E+00 | 5.60E+05 | 0.00E+00 | 6.96E+05 | 0.00E+00 | 0.00E+00 |
| PS(16.0/22.6)-H  | PS | (16.0)  | (22.6)   | 0.00E+00 | 0.00E+00 | 0.00E+00 | 0.00E+00 | 0.00E+00 | 2.11E+05 | 9.31E+04 | 1.58E+05 | 2.11E+05 | 0.00E+00 | 2.06E+07 |
| PS(16.0/22.6)-H  | PS | (16.0)  | (22.6)   | 0.00E+00 | 0.00E+00 | 0.00E+00 | 0.00E+00 | 8.69E+04 | 5.26E+05 | 1.45E+06 | 0.00E+00 | 2.24E+05 | 2.45E+05 | 2.84E+05 |
| PS(16.0/22.6)-H  | PS | (16.0)  | (22.6)   | 0.00E+00 | 0.00E+00 | 6.12E+03 | 0.00E+00 | 3.45E+05 | 0.00E+00 | 3.05E+05 | 0.00E+00 | 4.61E+05 | 0.00E+00 | 0.00E+00 |
| PS(16.0/22.6)-H  | PS | (16.0)  | (22.6)   | 0.00E+00 | 0.00E+00 | 1.89E+05 | 0.00E+00 | 2.59E+05 | 1.72E+05 | 1.16E+06 | 0.00E+00 | 7.74E+05 | 0.00E+00 | 1.68E+05 |
| PS(16.0/22.6)-H  | PS | (16.0)  | (22.6)   | 0.00E+00 | 0.00E+00 | 4.78E+05 | 1.23E+04 | 1.62E+07 | 4.92E+05 | 1.15E+07 | 6.20E+05 | 8.12E+06 | 0.00E+00 | 3.83E+05 |
| PS(16.0/22.6)-H  | PS | (16.0)  | (22.6)   | 0.00E+00 | 7.87E+05 | 1.91E+06 | 5.10E+05 | 1.62E+07 | 2.87E+05 | 9.91E+06 | 7.61E+05 | 2.74E+06 | 3.66E+05 | 7.09E+06 |
| PS(16.0/22.6)-H  | PS | (16.0)  | (22.6)   | 0.00E+00 | 2.63E+05 | 7.98E+05 | 3.07E+06 | 3.07E+06 | 3.38E+05 | 6.33E+05 | 3.07E+06 | 1.07E+06 | 1.38E+06 | 2.09E+06 |
| PS(16.0/22.6)-H  | PS | (16.0)  | (22.6)   | 0.00E+00 | 0.00E+00 | 4.34E+05 | 0.00E+00 | 4.53E+05 | 5.71E+05 | 4.67E+05 | 6.67E+05 | 3.69E+05 | 0.00E+00 | 1.24E+06 |
| PS(16.0/22.6)-H  | PS | (16.0)  | (22.6)   | 0.00E+00 | 9.84E+04 | 2.01E+05 | 0.00E+00 | 4.39E+05 | 3.91E+03 | 4.81E+05 | 5.16E+05 | 3.57E+05 | 0.00E+00 | 3.43E+05 |
| PS(16.0/22.6)+H  | PS | (16.0)  | (22.6)   | 0.00E+00 | 1.49E+06 | 6.18E+03 | 0.00E+00 | 0.00E+00 | 0.00E+00 | 7.69E+05 | 6.41E+05 | 2.01E+06 | 1.55E+04 | 0.00E+00 |
| PS(16.0/22.6)+H  | PS | (16.0)  | (22.6)   | 0.00E+00 | 6.92E+05 | 1.66E+06 | 5.45E+05 | 6.60E+05 | 2.19E+06 | 0.00E+00 | 3.22E+05 | 1.10E+06 | 1.69E+06 | 2.37E+06 |
| PS(18.2/20.4)-H  | PS | (18.2)  | (20.4)   | 1.69E+03 | 7.85E+05 | 9.06E+05 | 2.35E+06 | 1.81E+06 | 4.73E+05 | 6.50E+05 | 3.92E+05 | 0.00E+00 | 1.60E+06 | 2.36E+06 |
| PS(18.0/22.6)-H  | PS | (18.0)  | (22.6)   | 0.00E+00 | 7.95E+05 | 2.10E+06 | 0.00E+00 | 1.11E+06 | 1.48E+06 | 1.48E+06 | 7.08E+06 | 2.08E+03 | 4.67E+06 | 3.96E+06 |
| PS(18.0/22.6)+H  | PS | (18.0)  | (22.6)   | 0.00E+00 | 1.89E+06 | 1.86E+06 | 1.27E+06 | 1.58E+06 | 7.93E+06 | 1.08E+06 | 1.58E+06 | 1.08E+06 | 3.77E+06 | 1.29E+07 |
| PS(18.1/22.0)-H  | PS | (18.1)  | (22.0)   | 0.00E+00 | 0.00E+00 | 0.00E+00 | 0.00E+00 | 0.00E+00 | 4.71E+05 | 1.90E+06 | 3.06E+05 | 1.02E+06 | 2.38E+05 | 0.00E+00 |
| PS(18.1/22.0)+H  | PS | (18.1)  | (22.0)   | 0.00E+00 | 0.00E+00 | 0.00E+00 | 0.00E+00 | 6.62E+05 | 7.86E+06 | 9.65E+05 | 1.01E+06 | 2.13E+06 | 4.16E+05 | 3.21E+05 |
| PS(18.1/22.0)+H  | PS | (18.1)  | (22.0)   | 0.00E+00 | 0.00E+00 | 0.00E+00 | 2.58E+05 | 5.06E+05 | 8.19E+06 | 2.35E+06 | 8.83E+05 | 2.83E+05 | 3.13E+06 | 7.66E+05 |
| PS(18.1/22.0)+H  | PS | (18.1)  | (22.0)   | 0.00E+00 | 0.00E+00 | 0.00E+00 | 6.04E+05 | 2.13E+06 | 5.70E+06 | 8.40E+06 | 7.43E+06 | 5.85E+06 | 1.32E+07 | 2.33E+06 |
| PS(18.1/22.0)-H  | PS | (18     |          |          |          |          |          |          |          |          |          |          |          |          |

|                 |    |          |        |          |          |          |          |          |          |          |          |          |          |          |          |
|-----------------|----|----------|--------|----------|----------|----------|----------|----------|----------|----------|----------|----------|----------|----------|----------|
| PS(18:0/22:6)-H | PS | (18:0)   | (22:6) | 0.00E+00 | 0.00E+00 | 3.19E+05 | 0.00E+00 | 5.31E+05 | 7.69E+05 | 3.45E+06 | 1.58E+06 | 7.12E+05 | 1.38E+06 | 3.94E+06 | 3.62E+06 |
| PS(18:0/22:6)-H | PS | (18:0)   | (22:6) | 0.00E+00 | 0.00E+00 | 0.00E+00 | 2.93E+03 | 0.00E+00 | 5.15E+05 | 2.53E+06 | 1.41E+05 | 3.34E+05 | 8.34E+06 | 8.72E+05 | 3.79E+06 |
| PS(18:0/22:6)-H | PS | (18:0)   | (22:6) | 0.00E+00 | 0.00E+00 | 2.44E+05 | 5.94E+06 | 2.37E+05 | 5.69E+05 | 2.65E+06 | 1.42E+05 | 1.53E+06 | 3.04E+06 | 8.05E+05 | 2.08E+06 |
| PS(18:0/22:6)-H | PS | (18:0)   | (22:6) | 0.00E+00 | 0.00E+00 | 1.51E+03 | 2.09E+05 | 2.09E+05 | 5.38E+05 | 2.72E+06 | 0.00E+00 | 3.27E+06 | 3.35E+05 | 3.57E+05 | 8.57E+06 |
| PS(18:0/22:6)-H | PS | (18:0)   | (22:6) | 0.00E+00 | 0.00E+00 | 1.63E+05 | 4.25E+06 | 9.99E+05 | 1.49E+06 | 5.70E+05 | 1.03E+05 | 3.96E+05 | 6.57E+06 | 1.23E+06 | 1.52E+06 |
| PS(18:0/22:6)-H | PS | (18:0)   | (22:6) | 0.00E+00 | 0.00E+00 | 2.88E+05 | 3.54E+06 | 1.85E+05 | 1.05E+05 | 2.32E+06 | 1.30E+05 | 2.21E+06 | 1.01E+07 | 3.58E+06 | 2.40E+06 |
| PS(18:0/22:6)-H | PS | (18:0)   | (22:6) | 0.00E+00 | 0.00E+00 | 1.80E+05 | 1.24E+06 | 3.37E+05 | 1.43E+06 | 1.68E+06 | 3.77E+05 | 8.71E+05 | 1.22E+06 | 2.50E+06 | 6.44E+05 |
| PS(18:0/22:6)-H | PS | (18:0)   | (22:6) | 0.00E+00 | 0.00E+00 | 1.20E+06 | 2.60E+06 | 7.23E+05 | 1.62E+06 | 5.58E+06 | 3.01E+05 | 5.98E+06 | 1.98E+06 | 2.67E+06 | 6.41E+06 |
| PS(18:0/22:6)-H | PS | (18:0)   | (22:6) | 0.00E+00 | 0.00E+00 | 7.55E+05 | 1.44E+06 | 3.37E+05 | 9.80E+05 | 4.44E+05 | 1.58E+06 | 5.17E+06 | 1.91E+06 | 1.53E+07 | 3.14E+06 |
| PS(18:0/22:6)-H | PS | (18:0)   | (22:6) | 0.00E+00 | 0.00E+00 | 2.24E+06 | 2.89E+06 | 4.11E+05 | 6.42E+05 | 9.60E+06 | 5.30E+05 | 8.89E+06 | 6.43E+06 | 1.72E+07 | 4.45E+06 |
| PS(18:0/22:6)-H | PS | (18:0)   | (22:6) | 0.00E+00 | 0.00E+00 | 0.93E+06 | 1.87E+06 | 9.24E+05 | 1.28E+06 | 4.54E+06 | 1.21E+06 | 2.39E+06 | 3.45E+06 | 6.66E+06 | 1.84E+07 |
| PS(18:0/22:6)-H | PS | (18:0)   | (22:6) | 0.00E+00 | 0.00E+00 | 4.90E+06 | 2.35E+07 | 2.99E+05 | 7.43E+05 | 2.73E+07 | 2.68E+05 | 2.63E+07 | 8.97E+06 | 2.53E+07 | 1.88E+07 |
| PS(18:0/22:6)-H | PS | (18:0)   | (22:6) | 0.00E+00 | 0.00E+00 | 4.81E+06 | 1.95E+06 | 9.17E+05 | 5.45E+06 | 3.69E+06 | 1.37E+06 | 1.82E+06 | 2.97E+06 | 1.40E+06 | 3.60E+06 |
| PS(18:0/22:6)-H | PS | (18:0)   | (22:6) | 0.00E+00 | 0.00E+00 | 1.07E+06 | 1.04E+07 | 6.96E+05 | 1.50E+07 | 2.08E+07 | 3.49E+05 | 1.28E+07 | 1.97E+07 | 4.66E+07 | 7.19E+07 |
| PS(18:0/22:6)-H | PS | (18:0)   | (22:6) | 0.00E+00 | 0.00E+00 | 4.22E+06 | 2.67E+06 | 4.55E+06 | 2.00E+06 | 5.86E+06 | 1.38E+06 | 3.93E+06 | 1.84E+06 | 4.68E+05 | 1.35E+06 |
| PS(18:0/22:6)-H | PS | (18:0)   | (22:6) | 0.00E+00 | 0.00E+00 | 3.51E+06 | 6.87E+05 | 4.75E+06 | 2.33E+06 | 4.44E+06 | 2.49E+06 | 6.78E+06 | 3.46E+06 | 1.31E+07 | 4.94E+07 |
| PS(18:0/22:6)-H | PS | (18:0)   | (22:6) | 0.00E+00 | 0.00E+00 | 7.12E+05 | 7.98E+05 | 1.67E+06 | 1.06E+06 | 3.84E+06 | 4.20E+06 | 7.08E+06 | 4.60E+06 | 5.75E+07 | 2.18E+06 |
| PS(18:0/22:6)-H | PS | (18:0)   | (22:6) | 0.00E+00 | 0.00E+00 | 8.37E+06 | 4.58E+06 | 1.27E+07 | 1.77E+07 | 1.32E+07 | 2.01E+07 | 3.43E+07 | 3.43E+07 | 1.03E+07 | 4.81E+08 |
| PS(18:0/22:6)-H | PS | (18:0)   | (22:6) | 0.00E+00 | 0.00E+00 | 2.58E+06 | 1.35E+07 | 1.37E+07 | 1.87E+07 | 4.37E+06 | 1.32E+06 | 1.11E+07 | 4.23E+06 | 1.10E+07 | 2.47E+07 |
| PS(18:0/22:6)-H | PS | (18:0)   | (22:6) | 0.00E+00 | 0.00E+00 | 7.07E+06 | 1.42E+08 | 1.31E+07 | 3.10E+07 | 1.64E+07 | 1.12E+07 | 1.87E+07 | 7.51E+07 | 2.45E+08 | 2.45E+08 |
| PS(18:0/22:6)-H | PS | (18:0)   | (22:6) | 0.00E+00 | 0.00E+00 | 2.24E+06 | 1.72E+07 | 7.09E+06 | 6.59E+07 | 2.32E+07 | 3.99E+05 | 1.09E+07 | 1.07E+07 | 2.97E+07 | 2.23E+07 |
| PS(18:0/22:6)-H | PS | (18:0)   | (22:6) | 5.39E+06 | 0.00E+00 | 3.04E+07 | 7.32E+07 | 4.44E+07 | 3.10E+07 | 1.79E+07 | 2.42E+07 | 6.88E+08 | 0.00E+00 | 0.00E+00 | 2.45E+08 |
| PS(18:0/22:6)-H | PS | (18:0)   | (22:6) | 0.00E+00 | 0.00E+00 | 1.75E+06 | 2.80E+07 | 3.09E+07 | 1.75E+07 | 3.94E+07 | 1.11E+07 | 8.24E+07 | 7.94E+07 | 2.46E+07 | 8.24E+07 |
| PS(18:0/22:6)-H | PS | (18:0)   | (22:6) | 4.53E+05 | 4.73E+07 | 9.97E+06 | 5.80E+08 | 1.18E+08 | 4.93E+08 | 1.44E+08 | 9.01E+07 | 3.48E+08 | 5.93E+08 | 7.09E+08 | 9.18E+08 |
| PS(18:0/22:6)-H | PS | (18:0)   | (22:6) | 0.00E+00 | 0.89E+06 | 1.32E+07 | 5.17E+07 | 5.71E+07 | 6.44E+07 | 1.92E+07 | 5.79E+06 | 1.47E+07 | 1.48E+08 | 1.02E+08 | 2.87E+07 |
| PS(18:0/22:6)-H | PS | (18:0)   | (22:6) | 2.33E+07 | 7.29E+07 | 1.82E+07 | 2.67E+07 | 3.56E+07 | 8.84E+06 | 2.86E+07 | 5.74E+06 | 1.27E+08 | 1.08E+07 | 5.56E+07 | 1.75E+07 |
| PS(18:0/22:6)-H | PS | (18:0)   | (22:6) | 4.50E+04 | 3.55E+06 | 6.11E+06 | 4.83E+07 | 5.58E+06 | 2.42E+07 | 7.39E+06 | 2.14E+06 | 9.83E+06 | 1.67E+07 | 1.04E+08 | 7.15E+07 |
| PS(18:0/22:6)-H | PS | (18:0)   | (22:6) | 1.03E+04 | 7.35E+07 | 2.61E+06 | 5.53E+07 | 3.62E+06 | 1.52E+08 | 3.82E+07 | 6.41E+06 | 5.75E+07 | 6.28E+06 | 0.00E+00 | 1.43E+07 |
| PS(18:0/22:6)-H | PS | (18:0)   | (22:6) | 1.58E+05 | 1.92E+06 | 1.99E+05 | 1.94E+06 | 1.96E+05 | 2.22E+06 | 5.98E+06 | 6.15E+06 | 5.98E+06 | 2.22E+06 | 2.34E+06 | 2.05E+06 |
| PS(18:0/22:6)-H | PS | (18:0)   | (22:6) | 0.00E+00 | 0.00E+00 | 1.78E+08 | 2.01E+08 | 1.53E+08 | 2.79E+07 | 3.28E+06 | 2.07E+08 | 2.05E+08 | 6.96E+08 | 6.96E+08 | 4.80E+08 |
| PS(18:0/22:6)-H | PS | (18:0)   | (22:6) | 0.00E+00 | 4.87E+06 | 1.61E+06 | 4.37E+06 | 1.70E+08 | 7.25E+06 | 3.55E+07 | 9.42E+06 | 4.18E+07 | 1.14E+08 | 3.73E+07 | 2.19E+07 |
| PS(18:0/22:6)-H | PS | (18:0)   | (22:6) | 7.92E+07 | 2.40E+08 | 1.01E+08 | 2.81E+08 | 1.55E+08 | 2.18E+07 | 0.00E+00 | 1.36E+09 | 2.22E+08 | 2.36E+08 | 6.54E+08 | 9.76E+07 |
| PS(18:0/22:6)-H | PS | (18:0)   | (22:6) | 0.00E+00 | 5.24E+06 | 2.03E+06 | 2.80E+08 | 1.68E+08 | 7.92E+06 | 1.69E+07 | 4.53E+05 | 1.39E+06 | 7.97E+07 | 9.31E+06 | 1.11E+07 |
| PS(18:0/22:6)-H | PS | (18:0)   | (22:6) | 2.03E+06 | 1.69E+08 | 1.15E+08 | 3.74E+08 | 4.02E+07 | 1.15E+08 | 1.19E+09 | 8.92E+08 | 1.00E+09 | 1.28E+08 | 0.00E+00 | 1.97E+08 |
| PS(18:0/22:6)-H | PS | (18:0)   | (22:6) | 0.00E+00 | 4.27E+06 | 4.47E+06 | 8.55E+06 | 3.23E+06 | 6.00E+06 | 2.05E+06 | 2.09E+06 | 8.19E+07 | 5.85E+06 | 1.30E+07 | 2.34E+07 |
| PS(18:0/22:6)-H | PS | (18:0)   | (22:6) | 0.00E+00 | 8.99E+06 | 6.73E+06 | 8.06E+06 | 3.75E+06 | 0.00E+00 | 2.23E+06 | 2.21E+06 | 1.09E+06 | 2.28E+06 | 3.67E+06 | 1.32E+07 |
| PS(18:0/22:6)-H | PS | (18:0)   | (22:6) | 0.00E+00 | 2.19E+06 | 6.73E+06 | 2.81E+07 | 4.29E+07 | 2.78E+08 | 2.21E+08 | 1.38E+08 | 2.67E+08 | 2.67E+08 | 2.39E+08 | 3.95E+08 |
| PS(18:0/22:6)-H | PS | (18:0)   | (22:6) | 3.57E+08 | 2.63E+08 | 3.95E+08 | 3.39E+08 | 1.88E+08 | 7.06E+08 | 1.19E+07 | 8.98E+07 | 1.68E+08 | 3.81E+08 | 8.78E+08 | 9.63E+08 |
| PS(18:0/22:6)-H | PS | (18:0)   | (22:6) | 0.00E+00 | 0.00E+00 | 0.00E+00 | 0.00E+00 | 1.28E+07 | 0.00E+00 | 2.16E+07 | 0.00E+00 | 0.00E+00 | 0.00E+00 | 0.00E+00 | 0.00E+00 |
| PS(40:6)-H      | PS | (40:6)   |        | 2.33E+06 | 0.00E+00 | 0.00E+00 | 0.00E+00 | 1.56E+07 | 0.00E+00 | 5.28E+06 | 6.23E+06 | 0.00E+00 | 1.07E+08 | 0.00E+00 | 0.00E+00 |
| PS(18:0/22:6)-H | PS | (18:0)   | (22:6) | 0.00E+00 | 1.49E+08 | 1.35E+08 | 1.36E+08 | 1.55E+08 | 2.21E+08 | 1.28E+08 | 1.80E+08 | 2.36E+08 | 2.38E+08 | 2.87E+08 | 3.13E+08 |
| PS(18:0/22:6)-H | PS | (18:0)   | (22:6) | 0.00E+00 | 1.57E+08 | 1.03E+08 | 5.67E+07 | 8.47E+07 | 1.08E+08 | 3.42E+07 | 0.00E+00 | 1.00E+08 | 1.58E+07 | 1.23E+08 | 1.29E+08 |
| PS(18:0/22:6)-H | PS | (18:0)   | (22:6) | 0.00E+00 | 1.45E+08 | 1.35E+08 | 1.39E+08 | 1.55E+08 | 0.00E+00 | 1.17E+08 | 1.80E+08 | 2.36E+08 | 2.42E+08 | 1.07E+08 | 3.13E+08 |
| PS(18:0/22:6)-H | PS | (18:0)   | (22:6) | 7.62E+04 | 1.76E+08 | 9.97E+07 | 7.00E+07 | 9.18E+07 | 9.84E+07 | 3.84E+07 | 1.53E+08 | 2.47E+07 | 4.77E+07 | 1.09E+08 | 6.46E+07 |
| PS(18:0/22:6)-H | PS | (18:0)   | (22:6) | 3.00E+04 | 0.00E+00 | 0.00E+00 | 0.00E+00 | 0.00E+00 | 0.00E+00 | 2.25E+06 | 0.00E+00 | 0.00E+00 | 1.18E+08 | 0.00E+00 | 0.00E+00 |
| PS(18:0/22:6)-H | PS | (18:0)   | (22:6) | 0.00E+00 | 0.00E+00 | 0.00E+00 | 0.00E+00 | 0.00E+00 | 8.01E+05 | 0.00E+00 | 0.00E+00 | 0.00E+00 | 0.00E+00 | 0.00E+00 | 0.00E+00 |
| PS(18:0/22:6)-H | PS | (18:0/6) | (22:6) | 2.24E+03 | 0.00E+00 | 1.13E+06 | 6.14E+06 | 3.63E+06 | 1.49E+06 | 2.41E+06 | 1.51E+07 | 0.00E+00 | 3.62E+06 | 0.00E+00 | 5.72E+06 |
| PS(18:1/24:0)-H | PS | (18:1)   | (24:0) | 0.00E+00 | 6.41E+06 | 0.00E+00 |
| PS(18:1/24:0)-H | PS | (18:1)   | (24:0) | 0.00E+00 | 0.00E+00 | 0.00E+00 | 0.00E+00 | 0.00E+00 | 0.00E+00 | 4.88E+05 | 8.41E+06 | 6.37E+06 | 7.95E+06 | 3.22E+06 | 6.57E+06 |
| PS(18:1/24:0)-H | PS | (18:1)   | (24:0) | 0.00E+00 | 0.00E+00 | 0.00E+00 | 0.00E+00 | 6.00E+05 | 5.61E+06 | 2.64E+07 | 3.01E+07 | 3.37E+07 | 3.93E+07 | 4.20E+07 | 1.12E+06 |
| PS(18:1/24:0)-H | PS | (18:1)   | (24:0) | 0.00E+00 | 0.00E+00 | 0.00E+00 | 0.00E+00 | 8.92E+04 | 2.83E+05 | 6.51E+06 | 1.28E+07 | 1.36E+07 | 9.92E+06 | 8.03E+06 | 3.10E+06 |
| PS(42:5)-H      | PS | (42:5)   |        | 1.68E+07 | 1.04E+07 | 1.20E+07 | 1.48E+07 | 7.07E+06 | 2.41E+07 | 1.70E+07 | 4.43E+06 | 8.03E+06 | 4.19E+07 | 7.45E+07 | 1.52E+07 |
| PS(24:5/18:0)-H | PS | (24:5)   | (18:0) | 1.87E+07 | 4.84E+05 | 3.10E+06 | 2.34E+06 | 8.34E+05 | 1.98E+06 | 5.79E+05 | 3.64E+06 | 2.01E+06 | 3.20E+07 | 1.68E+06 | 1.38E+06 |
| PS(20:2/22:4)-H | PS | (20:2)   | (22:4) | 5.77E+06 | 5.27E+06 | 5.82E+06 | 6.00E+06 | 5.82E+06 | 1.49E+06 | 3.98E+06 | 1.39E+06 | 1.93E+06 | 2.86E+06 | 1.74E+06 | 1.44E+06 |
| PS(20:3/22:4)-H | PS | (20:3)   | (22:4) | 2.98E+07 | 1.72E+07 | 1.17E+07 | 1.07E+08 | 1.82E+07 | 7.78E+07 | 7.01E+06 | 3.45E+07 | 1.42E+07 | 5.27E+07 | 5.41E+07 | 3.21E+07 |
| PS(42:7)-H      | PS | (42:7)   |        | 0.00E+00 | 1.14E+05 | 6.09E+05 | 1.27E+06 | 1.45E+06 | 1.85E+06 | 7.07E+06 | 2.54E+06 | 1.93E+06 | 8.12E+03 | 1.46E+06 | 2.31E+06 |
| PS(42:9)-H      | PS | (42:9)   |        | 1.03E+05 | 1.32E+05 | 0.00E+00 | 0.00E+00 | 0.00E+00 | 5.25E+03 | 2.31E+05 | 1.05E+03 | 8.34E+05 | 1.05E+06 | 7.98E+05 | 4.71E+05 |
| PS(42:9)-H      | PS | (42:9)   |        | 0.00E+00 | 1.01E+05 | 9.55E+04 | 1.22E+05 | 9.01E+04 | 2.58E+05 | 1.30E+05 | 5.92E+04 | 1.24E+06 | 4.31E+05 | 1.83E+06 | 9.27E+04 |
| PS(42:9)-H      | PS | (42:9)   |        | 0.00E+00 | 1.71E+06 | 8.43E+05 | 8.76E+05 | 5.54E+05 | 3.26E+06 | 1.21E+06 | 0.00E+00 | 1.53E+06 | 3.16E+06 | 5.95E+06 | 1.62E+07 |
| PS(22:4/22:4)-H | PS | (22:4)   | (22:6) | 8.02E+08 | 2.10E+08 | 2.04E+08 | 8.63E+07 | 8.10E+06 | 5.30E+08 | 1.76E+08 | 1.76E+08 | 1.96E+08 | 6.94E+08 | 6.56E+09 | 1.19E+09 |
| SM(22:4/22:4)-H | SM | (22:4)   | (22:4) | 9.60E+07 | 7.79E+06 | 9.98E+07 | 3.14E+07 | 1.89E+07 | 2.46E+07 | 5.16E+07 | 4.21E+07 | 1.86E+07 | 1.27E+06 | 1.21E+08 | 1.21E+08 |
| SM(d31:1)-H     | SM | (d31:1)  |        |          |          |          |          |          |          |          |          |          |          |          |          |

|                     |    |                |          |          |          |          |          |          |          |          |          |          |          |          |
|---------------------|----|----------------|----------|----------|----------|----------|----------|----------|----------|----------|----------|----------|----------|----------|
| SM(d41:1)H          | SM | (d41:1)        | 1.06E+10 | 5.47E+09 | 9.16E+09 | 2.16E+08 | 1.83E+09 | 9.27E+08 | 3.64E+09 | 1.22E+09 | 2.85E+09 | 1.11E+09 | 2.46E+09 | 2.05E+07 |
| SM(d41:1)HCCO       | SM | (d41:1)        | 1.94E+09 | 1.04E+09 | 1.68E+09 | 1.59E+09 | 1.13E+09 | 4.16E+08 | 9.03E+08 | 6.87E+08 | 9.22E+08 | 2.17E+09 | 5.03E+08 | 4.40E+08 |
| SM(d41:1)H          | SM | (d41:1)        | 0.00E+00 | 0.00E+00 | 0.00E+00 | 5.96E+08 | 5.35E+08 | 4.22E+07 | 3.60E+09 | 7.71E+08 | 1.48E+09 | 1.98E+07 | 3.00E+07 | 3.29E+07 |
| SM(d41:1)HCCO       | SM | (d41:1)        | 0.00E+00 | 0.00E+00 | 0.00E+00 | 3.30E+08 | 3.00E+08 | 8.00E+07 | 9.40E+07 | 1.00E+09 | 1.40E+09 | 1.21E+09 | 1.50E+09 | 8.15E+07 |
| SM(d41:1)H          | SM | (d41:1)        | 0.00E+00 | 0.00E+00 | 0.00E+00 | 5.03E+07 | 7.83E+07 | 9.41E+06 | 0.00E+00 | 7.71E+08 | 1.49E+09 | 1.73E+08 | 4.60E+07 | 2.76E+07 |
| SM(d41:1)H          | SM | (d41:1)        | 0.00E+00 | 0.00E+00 | 0.00E+00 | 0.00E+00 | 0.00E+00 | 2.32E+07 | 0.00E+00 | 0.00E+00 | 0.00E+00 | 1.02E+08 | 2.73E+07 | 2.61E+07 |
| SM(d18:2/13:1)H     | SM | (d18:1) (23:1) | 1.11E+09 | 6.23E+08 | 1.22E+09 | 7.28E+08 | 7.27E+08 | 1.61E+09 | 6.33E+08 | 8.46E+08 | 8.71E+08 | 9.82E+08 | 1.58E+09 | 2.04E+09 |
| SM(d41:2)HCCO       | SM | (d18:1) (23:1) | 2.21E+08 | 1.15E+08 | 2.09E+08 | 4.00E+08 | 2.29E+08 | 3.81E+08 | 1.20E+08 | 1.73E+08 | 1.08E+08 | 1.94E+08 | 3.46E+08 | 4.05E+08 |
| SM(d41:2)H          | SM | (d41:2)        | 0.00E+00 | 6.30E+08 | 0.00E+00 | 1.96E+08 | 4.36E+07 | 8.24E+07 | 0.00E+00 | 0.00E+00 | 0.00E+00 | 0.00E+00 | 0.00E+00 | 0.00E+00 |
| SM(d42:1)H          | SM | (d42:1)        | 2.75E+09 | 2.55E+09 | 1.39E+10 | 5.55E+09 | 3.63E+09 | 1.84E+09 | 1.84E+09 | 3.61E+09 | 3.88E+09 | 6.81E+09 | 3.61E+09 | 1.62E+10 |
| SM(d42:1)HCCO       | SM | (d42:1)        | 0.00E+00 | 5.80E+08 | 3.33E+08 | 3.83E+09 | 0.00E+00 | 5.65E+09 | 4.95E+08 | 7.97E+08 | 6.53E+08 | 5.94E+09 | 5.71E+09 | 1.17E+10 |
| SM(d24:0/18:1)HCCO  | SM | (d24:0) (18:1) | 4.60E+09 | 4.18E+09 | 4.41E+09 | 4.02E+09 | 2.65E+09 | 5.76E+09 | 3.36E+09 | 1.30E+09 | 3.20E+09 | 1.04E+10 | 6.01E+09 | 1.20E+10 |
| SM(d42:1)H          | SM | (d24:0) (18:1) | 2.50E+10 | 2.46E+10 | 5.75E+10 | 6.00E+09 | 5.91E+08 | 3.14E+09 | 0.00E+00 | 0.00E+00 | 0.00E+00 | 5.20E+09 | 1.87E+09 | 0.00E+00 |
| SM(d24:0/18:1)HCCO  | SM | (d24:0) (18:1) | 4.56E+09 | 4.05E+09 | 1.28E+09 | 3.53E+09 | 3.11E+09 | 2.02E+09 | 2.56E+09 | 9.29E+08 | 3.07E+09 | 1.84E+09 | 3.26E+09 | 3.52E+09 |
| SM(d24:0/18:1)HCHCO | SM | (d24:0) (18:1) | 2.07E+08 | 1.01E+08 | 1.75E+08 | 2.47E+08 | 5.49E+07 | 1.44E+08 | 6.40E+07 | 5.11E+07 | 1.10E+07 | 2.31E+08 | 2.04E+08 | 2.32E+08 |
| SM(d42:1)H          | SM | (d24:0) (18:1) | 2.55E+10 | 2.33E+10 | 3.81E+10 | 7.35E+09 | 5.58E+09 | 9.56E+09 | 4.11E+09 | 2.09E+09 | 9.29E+09 | 3.75E+09 | 7.55E+09 | 6.96E+09 |
| SM(d42:1)H          | SM | (d42:1)        | 0.00E+00 | 0.00E+00 | 0.00E+00 | 2.66E+06 | 1.22E+06 | 7.36E+06 | 0.00E+00 | 0.00E+00 | 3.35E+05 | 0.00E+00 | 0.00E+00 | 8.76E+06 |
| SM(d18:1/24:1)H     | SM | (d18:1) (24:1) | 3.60E+10 | 2.60E+10 | 3.12E+10 | 2.37E+10 | 1.72E+10 | 4.48E+10 | 2.74E+10 | 2.38E+10 | 1.27E+10 | 3.54E+10 | 4.86E+10 | 1.57E+10 |
| SM(d42:2)HCCO       | SM | (d18:1) (24:1) | 7.67E+09 | 5.40E+09 | 6.19E+09 | 7.64E+09 | 5.69E+09 | 1.45E+10 | 5.91E+09 | 4.36E+09 | 6.84E+09 | 1.02E+10 | 1.49E+10 | 1.91E+10 |
| SM(d42:2)H          | SM | (d42:2)        | 4.52E+08 | 0.00E+00 | 0.00E+00 | 6.91E+07 | 5.64E+07 | 4.11E+07 | 0.00E+00 | 4.21E+07 | 4.39E+07 | 5.86E+07 | 5.84E+07 | 5.33E+07 |
| SM(d42:2)H          | SM | (d42:2)        | 3.86E+05 | 8.51E+05 | 3.60E+05 | 2.75E+05 | 3.33E+05 | 5.94E+05 | 1.01E+05 | 1.48E+05 | 1.96E+05 | 5.29E+05 | 0.00E+00 | 7.31E+06 |
| SM(d18:1/24:2)H     | SM | (d18:1) (24:2) | 6.96E+09 | 5.50E+09 | 5.33E+09 | 1.16E+10 | 5.05E+09 | 4.17E+09 | 6.20E+09 | 4.03E+09 | 2.66E+10 | 1.69E+10 | 6.18E+09 | 2.00E+10 |
| SM(d42:3)HCCO       | SM | (d42:3) (24:2) | 1.43E+09 | 1.08E+09 | 9.35E+08 | 1.14E+09 | 1.38E+09 | 1.64E+09 | 1.39E+09 | 1.39E+09 | 1.60E+09 | 1.60E+09 | 1.78E+09 | 2.12E+09 |
| SM(d42:3)H          | SM | (d42:3)        | 5.41E+07 | 0.00E+00 | 0.00E+00 | 4.28E+06 | 2.75E+06 | 1.98E+07 | 0.00E+00 | 6.60E+06 | 2.01E+07 | 0.00E+00 | 0.00E+00 | 0.00E+00 |
| SM(d18:1/24:3)H     | SM | (d18:1) (24:3) | 9.57E+07 | 3.73E+07 | 2.34E+08 | 1.72E+07 | 5.34E+07 | 1.88E+06 | 2.24E+07 | 6.50E+07 | 1.27E+08 | 0.00E+00 | 5.52E+04 | 0.00E+00 |
| SM(d43:0)H          | SM | (d43:0)        | 3.10E+07 | 2.02E+07 | 6.75E+07 | 2.24E+06 | 3.31E+04 | 2.38E+06 | 2.92E+06 | 0.00E+00 | 2.33E+06 | 2.45E+06 | 0.00E+00 | 6.33E+06 |
| SM(d25:0/18:1)HCCO  | SM | (d25:0) (18:1) | 4.92E+06 | 7.86E+05 | 1.42E+06 | 1.45E+07 | 2.93E+06 | 2.88E+07 | 4.46E+05 | 2.15E+06 | 1.96E+05 | 5.93E+07 | 3.39E+07 | 8.79E+07 |
| SM(d43:1)H          | SM | (d25:0) (18:1) | 2.03E+07 | 5.81E+06 | 8.95E+07 | 0.00E+00 | 0.00E+00 | 5.34E+06 | 3.91E+06 | 3.28E+06 | 1.83E+06 | 9.45E+06 | 4.57E+06 | 4.90E+07 |
| SM(d25:0/18:1)HCCO  | SM | (d25:0) (18:1) | 2.05E+09 | 1.07E+08 | 1.77E+08 | 2.25E+08 | 5.59E+07 | 2.70E+07 | 7.03E+07 | 7.58E+07 | 1.58E+08 | 2.06E+08 | 2.06E+08 | 2.06E+08 |
| SM(d43:1)H          | SM | (d43:1)        | 1.29E+09 | 5.32E+08 | 9.96E+08 | 4.91E+08 | 5.53E+04 | 1.22E+07 | 2.88E+08 | 0.00E+00 | 0.00E+00 | 7.68E+07 | 1.26E+08 | 7.38E+07 |
| SM(d43:1)H          | SM | (d43:1)        | 1.29E+09 | 5.55E+08 | 1.35E+09 | 1.67E+08 | 7.00E+07 | 2.30E+08 | 2.86E+08 | 6.62E+07 | 5.10E+08 | 5.54E+08 | 1.22E+08 | 5.42E+07 |
| SM(d18:1/25:1)H     | SM | (d18:1) (25:1) | 1.12E+09 | 1.13E+06 | 1.26E+09 | 2.02E+08 | 6.53E+07 | 3.69E+08 | 9.73E+07 | 6.58E+06 | 4.35E+08 | 4.30E+08 | 4.96E+08 | 9.12E+08 |
| SM(d43:2)HCCO       | SM | (d18:1) (25:1) | 2.00E+08 | 3.33E+07 | 2.24E+08 | 1.66E+08 | 0.00E+00 | 2.42E+08 | 2.98E+07 | 2.68E+07 | 1.16E+08 | 5.91E+07 | 2.80E+08 | 3.47E+08 |
| SM(d25:0/18:2)HCCO  | SM | (d25:0) (18:2) | 1.99E+08 | 1.75E+08 | 4.05E+07 | 1.90E+08 | 8.99E+07 | 9.29E+06 | 4.93E+07 | 4.13E+07 | 1.18E+08 | 9.29E+06 | 4.29E+07 | 3.11E+06 |
| SM(d43:2)H          | SM | (d25:0) (18:2) | 5.54E+08 | 5.54E+08 | 2.60E+08 | 2.34E+07 | 3.23E+07 | 1.09E+07 | 1.33E+09 | 3.32E+07 | 1.89E+07 | 1.90E+08 | 4.29E+07 | 6.31E+08 |
| SM(d43:2)HCCO       | SM | (d43:2) (25:3) | 1.90E+00 | 1.94E+07 | 0.00E+00 | 1.31E+07 | 0.00E+00 | 5.43E+06 | 4.91E+07 | 6.83E+06 | 3.92E+06 | 3.92E+06 | 2.70E+06 | 2.70E+06 |
| SM(d18:1/25:3)H     | SM | (d18:1) (25:3) | 2.67E+08 | 1.13E+08 | 2.22E+08 | 9.07E+06 | 2.14E+06 | 3.14E+06 | 1.47E+08 | 5.83E+06 | 2.09E+07 | 1.81E+06 | 0.00E+00 | 0.00E+00 |
| SM(d43:4)H          | SM | (d43:4)        | 8.15E+07 | 9.01E+07 | 3.57E+07 | 0.00E+00 | 0.00E+00 | 0.00E+00 | 4.58E+07 | 6.38E+05 | 2.30E+06 | 0.00E+00 | 0.00E+00 | 0.00E+00 |
| SM(d22:1/22:0)HCCO  | SM | (d22:1) (22:0) | 5.23E+07 | 2.70E+07 | 2.64E+07 | 1.33E+08 | 5.20E+06 | 1.51E+08 | 9.12E+05 | 4.15E+06 | 1.75E+07 | 2.32E+08 | 1.85E+08 | 4.21E+08 |
| SM(d44:1)H          | SM | (d22:1) (22:0) | 2.93E+08 | 1.66E+08 | 1.50E+08 | 4.77E+08 | 3.84E+07 | 4.53E+08 | 4.10E+07 | 4.88E+06 | 1.03E+08 | 9.55E+07 | 3.16E+08 | 1.24E+09 |
| SM(d22:1/22:1)HCCO  | SM | (d22:1) (22:1) | 0.00E+00 | 0.00E+00 | 6.47E+05 | 8.53E+07 | 0.00E+00 | 1.08E+08 | 2.87E+05 | 0.00E+00 | 4.62E+03 | 1.66E+08 | 1.46E+08 | 3.67E+08 |
| SM(d44:2)H          | SM | (d22:1) (22:1) | 1.42E+08 | 1.46E+06 | 1.52E+06 | 3.80E+08 | 2.25E+08 | 1.55E+09 | 2.34E+06 | 1.11E+08 | 1.46E+07 | 8.70E+08 | 1.49E+09 | 1.48E+09 |
| SM(d18:1/26:1)H     | SM | (d18:1) (26:1) | 7.44E+08 | 1.86E+08 | 5.07E+08 | 1.15E+07 | 0.00E+00 | 1.79E+07 | 4.15E+07 | 7.78E+06 | 4.77E+07 | 2.85E+07 | 1.05E+08 | 1.84E+07 |
| SM(d44:2)HCCO       | SM | (d18:1) (26:1) | 1.37E+08 | 3.41E+07 | 7.49E+07 | 1.27E+07 | 2.18E+07 | 1.11E+08 | 3.95E+07 | 1.28E+07 | 1.26E+08 | 3.06E+07 | 1.46E+08 | 4.75E+08 |
| SM(d44:2)H          | SM | (d44:2)        | 1.10E+08 | 9.03E+07 | 1.35E+08 | 7.93E+04 | 3.51E+06 | 5.72E+06 | 1.24E+07 | 7.39E+06 | 2.77E+07 | 0.00E+00 | 6.04E+06 | 5.78E+06 |
| SM(d44:2)HCCO       | SM | (d44:2)        | 1.74E+08 | 5.71E+07 | 4.24E+07 | 5.61E+06 | 8.17E+06 | 3.08E+07 | 2.33E+08 | 1.17E+07 | 7.78E+06 | 8.24E+07 | 2.67E+07 | 3.69E+07 |
| SM(d18:1/26:2)H     | SM | (d18:1) (26:2) | 1.45E+08 | 2.56E+07 | 2.58E+07 | 2.08E+07 | 2.55E+07 | 1.65E+08 | 2.00E+08 | 7.35E+07 | 4.43E+07 | 6.83E+07 | 2.06E+08 | 8.75E+07 |
| SM(d44:3)HCCO       | SM | (d18:1) (26:2) | 5.58E+08 | 8.29E+06 | 1.43E+08 | 1.44E+08 | 2.05E+06 | 1.49E+07 | 1.40E+07 | 9.84E+06 | 1.40E+07 | 1.40E+07 | 1.63E+07 | 1.63E+07 |
| SM(d24:0/20:3)HCCO  | SM | (d24:0) (20:3) | 3.41E+06 | 1.69E+07 | 9.53E+05 | 0.00E+00 | 8.92E+05 | 3.73E+05 | 1.85E+07 | 5.35E+06 | 3.96E+06 | 0.00E+00 | 2.61E+06 | 6.94E+05 |
| SM(d18:1/26:3)H     | SM | (d18:1) (26:3) | 5.96E+07 | 6.13E+07 | 1.17E+07 | 0.00E+00 | 2.35E+04 | 0.00E+00 | 4.48E+06 | 1.06E+07 | 3.79E+06 | 0.00E+00 | 8.69E+06 | 0.00E+00 |
| SM(d44:4)H          | SM | (d44:4)        | 3.94E+08 | 0.00E+00 | 9.38E+08 | 4.59E+06 | 0.00E+00 | 3.59E+06 | 0.00E+00 | 0.00E+00 | 3.92E+07 | 2.19E+07 | 1.37E+05 | 2.22E+06 |
| SM(d18:1/26:3)H     | SM | (d18:1) (26:3) | 9.73E+08 | 8.52E+08 | 6.58E+08 | 1.32E+07 | 1.33E+07 | 7.62E+06 | 5.27E+08 | 0.00E+00 | 1.52E+08 | 5.65E+06 | 1.49E+07 | 1.31E+07 |
| SM(d18:1/26:4)H     | SM | (d18:1) (26:4) | 0.00E+00 | 1.29E+06 | 7.24E+08 | 8.82E+07 | 1.10E+08 | 1.16E+08 | 7.97E+08 | 1.19E+08 | 7.78E+08 | 9.64E+07 | 7.62E+07 | 1.27E+08 |
| SM(d18:1/26:4)H     | SM | (d18:1) (26:4) | 5.96E+08 | 7.12E+08 | 1.01E+09 | 1.41E+08 | 1.70E+08 | 8.39E+08 | 1.40E+09 | 1.30E+09 | 1.30E+09 | 1.30E+09 | 1.30E+09 | 1.30E+09 |
| SM(d18:1/26:4)H     | SM | (d18:1) (26:4) | 0.00E+00 | 0.00E+00 | 0.00E+00 | 1.94E+08 | 1.55E+08 | 0.00E+00 | 3.09E+08 | 1.33E+08 | 0.00E+00 | 0.00E+00 | 6.85E+03 | 0.00E+00 |
| SM(d18:1/26:5)H     | SM | (d18:1) (26:5) | 2.33E+07 | 2.78E+07 | 9.68E+06 | 5.12E+04 | 2.44E+07 | 2.75E+06 | 7.51E+07 | 6.30E+06 | 0.00E+00 | 0.00E+00 | 4.02E+06 | 4.80E+06 |
| SM(d45:4)H          | SM | (d45:4)        | 6.79E+07 | 2.55E+07 | 2.91E+07 | 0.00E+00 | 0.00E+00 | 0.00E+00 | 5.54E+06 | 9.53E+06 | 0.00E+00 | 0.00E+00 | 0.00E+00 | 0.00E+00 |
| SM(d46:4)H          | SM | (d46:4)        | 1.38E+07 | 1.23E+07 | 6.94E+06 | 0.00E+00 | 0.00E+00 | 0.00E+00 | 0.00E+00 | 1.54E+06 | 0.00E+00 | 0.00E+00 | 0.00E+00 | 0.00E+00 |
| SM(d47:2)H          | SM | (d47:2)        | 4.41E+06 | 1.05E+06 | 2.12E+07 | 1.02E+08 | 2.09E+07 | 3.60E+08 | 1.55E+07 | 7.55E+07 | 1.11E+08 | 3.88E+08 | 4.00E+08 | 3.12E+08 |
| SM(d50:4)H          | SM | (d50:4)        | 1.08E+08 | 3.32E+07 | 0.00E+00 | 8.48E+08 | 4.54E+08 | 2.90E+09 | 4.41E+07 | 1.24E+09 | 1.49E+09 | 2.24E+09 | 1.25E+09 | 1.25E+09 |
| So(d18:0)H          | So | (d18:0)        | 3.18E+07 | 1.75E+07 | 5.23E+07 | 3.19E+07 | 0.00E+00 | 4.18E+07 | 9.72E+06 | 9.87E+06 | 9.72E+06 | 4.40E+07 | 5.55E+07 | 5.55E+07 |
| So(d18:1)H          | So | (d18:1)        | 3.06E+08 | 1.55E+08 | 1.53E+08 | 2.44E+08 | 1.02E+08 | 2.45E+08 | 8.30E+07 | 1.36E+08 | 1.65E+08 | 3.98E+08 | 6.13E+08 | 6.93E+08 |
| So(d18:1)H          | So | (d18:1)        | 3.11E+08 | 7.71E+07 | 9.52E+07 | 1.81E+07 | 3.66E+07 | 3.44E+08 | 2.25E+07 | 1.40E+08 | 1.96E+08 | 0.00E+00 | 0.00E+00 | 0.00E+00 |
| So(d25:0)H          |    |                |          |          |          |          |          |          |          |          |          |          |          |          |



|                           |    |         |        |        |          |          |          |          |          |          |          |          |          |          |          |
|---------------------------|----|---------|--------|--------|----------|----------|----------|----------|----------|----------|----------|----------|----------|----------|----------|
| TC(G16/01/18/18/1)~NH4    | TG | (16/0)  | (18/1) | (18/1) | 0.00E+00 | 4.70E+05 | 7.65E+05 | 0.00E+00 | 0.00E+00 | 1.62E+08 | 3.06E+06 | 1.18E+08 | 6.32E+07 | 8.56E+07 | 0.00E+00 |
| TC(G16/01/18/18/1)~H      | TG | (16/0)  | (18/1) | (18/1) | 2.51E+05 | 0.00E+00 | 1.01E+06 | 5.88E+06 | 5.23E+04 | 4.41E+06 | 7.69E+06 | 1.48E+06 | 1.85E+06 | 3.61E+04 | 0.00E+00 |
| TC(G16/01/18/18/1)~NH4    | TG | (16/0)  | (18/1) | (18/1) | 2.63E+09 | 1.40E+09 | 3.66E+09 | 7.89E+10 | 6.62E+10 | 9.01E+10 | 9.48E+08 | 5.90E+10 | 1.46E+10 | 8.09E+10 | 8.80E+10 |
| TC(G16/01/18/18/1)~NH4    | TG | (16/0)  | (18/1) | (18/1) | 0.00E+00 |
| TC(G16/01/18/18/1)~NH4    | TG | (16/0)  | (18/1) | (18/1) | 0.00E+00 | 0.00E+00 | 1.72E+04 | 0.00E+00 | 0.00E+00 | 9.50E+08 | 7.77E+05 | 0.00E+00 | 6.97E+05 | 6.98E+08 | 8.02E+08 |
| TC(G16/01/18/18/1)~NH4    | TG | (16/0)  | (18/1) | (18/1) | 0.00E+00 | 2.18E+00 | 2.18E+00 | 0.00E+00 | 0.00E+00 | 1.19E+06 | 0.00E+00 | 0.00E+00 | 1.19E+06 | 0.00E+00 | 0.00E+00 |
| TC(G18/1p/16/18/18/1)~NH4 | TG | (18/1p) | (16/1) | (18/1) | 2.61E+06 | 1.75E+07 | 0.00E+00 | 1.56E+07 | 1.56E+07 | 1.84E+07 | 0.00E+00 | 1.54E+07 | 1.70E+06 | 3.47E+07 | 3.58E+06 |
| TC(G16/1/18/18/1)~NH4     | TG | (16/1)  | (18/1) | (18/1) | 0.00E+00 | 0.00E+00 | 0.00E+00 | 0.00E+00 | 0.00E+00 | 2.09E+05 | 3.23E+05 | 5.15E+06 | 6.42E+04 | 3.72E+05 | 8.73E+05 |
| TC(G16/1/18/18/1)~NH4     | TG | (16/1)  | (18/1) | (18/1) | 0.00E+00 | 0.00E+00 | 0.00E+00 | 0.00E+00 | 1.64E+05 | 2.95E+05 | 3.70E+05 | 0.00E+00 | 1.64E+05 | 0.00E+00 | 1.31E+06 |
| TC(G16/01/18/18/2)~NH4    | TG | (16/0)  | (18/1) | (18/2) | 0.00E+00 | 2.35E+06 | 0.00E+00 | 5.49E+06 |
| TC(G16/1/18/18/1)~NH4     | TG | (16/1)  | (18/1) | (18/1) | 0.00E+00 | 3.62E+06 | 0.00E+00 | 1.21E+05 |
| TC(G16/01/18/18/2)~NH4    | TG | (16/0)  | (18/1) | (18/2) | 1.76E+04 | 0.00E+00 | 7.20E+05 | 2.48E+08 | 1.58E+08 | 7.49E+07 | 2.77E+06 | 0.00E+00 | 3.25E+07 | 3.05E+08 | 4.03E+08 |
| TC(G16/1/18/18/1)~NH4     | TG | (16/1)  | (18/1) | (18/1) | 1.29E+04 | 0.00E+00 | 9.47E+06 | 1.80E+06 | 1.80E+06 | 2.76E+06 | 1.69E+06 | 0.00E+00 | 2.29E+06 | 3.76E+06 | 1.13E+07 |
| TC(G16/1/18/18/1)~NH4     | TG | (16/1)  | (18/1) | (18/1) | 4.16E+09 | 2.33E+09 | 3.94E+09 | 5.88E+10 | 4.81E+10 | 5.47E+10 | 6.13E+08 | 4.20E+10 | 1.51E+10 | 6.34E+10 | 8.73E+10 |
| TC(G16/01/18/18/2)~NH4    | TG | (16/0)  | (18/1) | (18/2) | 4.28E+09 | 2.65E+09 | 5.75E+09 | 8.40E+10 | 5.46E+10 | 5.61E+10 | 2.47E+08 | 4.97E+10 | 1.51E+10 | 1.11E+10 | 1.19E+10 |
| TC(G16/01/18/18/2)~NH4    | TG | (16/0)  | (18/1) | (18/2) | 3.70E+04 | 7.61E+02 | 2.12E+05 | 0.00E+00 | 2.25E+07 | 0.00E+00 | 0.00E+00 | 0.00E+00 | 3.77E+05 | 0.00E+00 | 0.00E+00 |
| TC(G16/1/18/18/1)~NH4     | TG | (16/1)  | (18/1) | (18/1) | 3.62E+02 | 1.90E+04 | 2.29E+04 | 3.56E+07 | 0.00E+00 | 7.97E+08 | 1.37E+05 | 2.95E+06 | 5.22E+05 | 4.92E+08 | 8.34E+08 |
| TC(G16/01/18/18/2)~NH4    | TG | (16/0)  | (18/1) | (18/2) | 1.91E+07 | 1.75E+07 | 0.00E+00 | 1.56E+07 | 1.58E+07 | 1.84E+07 | 0.00E+00 | 1.54E+07 | 1.72E+06 | 3.47E+07 | 2.56E+06 |
| TC(G16/01/18/18/2)~NH4    | TG | (16/0)  | (18/1) | (18/2) | 8.25E+01 | 0.00E+00 | 0.00E+00 | 6.61E+08 | 3.49E+08 | 3.49E+08 | 0.00E+00 | 7.09E+07 | 7.33E+07 | 1.03E+07 | 0.00E+00 |
| TC(G16/1/18/18/1)~NH4     | TG | (16/1)  | (18/1) | (18/2) | 9.25E+08 | 1.19E+09 | 2.30E+09 | 4.23E+10 | 4.34E+10 | 1.22E+10 | 5.06E+08 | 2.89E+10 | 1.09E+10 | 4.61E+10 | 4.59E+10 |
| TC(G16/1/18/18/2)~H       | TG | (16/1)  | (18/1) | (18/2) | 0.00E+00 | 0.00E+00 | 0.00E+00 | 6.68E+04 | 1.03E+07 | 2.00E+07 | 0.00E+00 | 1.41E+07 | 5.82E+06 | 1.07E+06 | 0.86E+06 |
| TC(G16/01/18/18/3)~H      | TG | (16/0)  | (18/1) | (18/3) | 4.41E+07 | 1.66E+07 | 5.94E+07 | 7.68E+06 | 2.73E+08 | 3.76E+08 | 2.20E+07 | 2.26E+08 | 2.18E+08 | 2.75E+08 | 5.85E+06 |
| TC(G16/01/18/18/3)~NH4    | TG | (16/0)  | (18/1) | (18/3) | 8.73E+04 | 0.00E+00 | 9.65E+05 | 7.53E+07 | 0.00E+00 | 1.33E+08 | 6.51E+05 | 4.66E+07 | 3.85E+07 | 2.00E+00 | 0.00E+00 |
| TC(G16/01/18/18/3)~H      | TG | (16/0)  | (18/1) | (18/3) | 2.02E+04 | 6.51E+04 | 0.00E+00 | 3.97E+07 | 3.98E+06 | 8.51E+07 | 0.00E+00 | 2.86E+06 | 3.55E+05 | 8.27E+06 | 8.33E+07 |
| TC(G16/1/18/18/1)~H       | TG | (16/1)  | (18/1) | (18/3) | 3.88E+00 | 0.00E+00 | 0.00E+00 | 6.42E+07 | 6.43E+07 | 1.81E+08 | 0.00E+00 | 6.48E+06 | 0.00E+00 | 7.59E+07 | 4.92E+07 |
| TC(G16/1/18/18/2)~H       | TG | (16/1)  | (18/1) | (18/3) | 2.43E+02 | 4.03E+02 | 2.43E+08 | 2.44E+10 | 2.44E+10 | 3.21E+11 | 2.97E+11 | 3.21E+11 | 2.73E+10 | 1.98E+10 | 0.00E+00 |
| TC(G18/4/16/01/18/1)~H    | TG | (18/4)  | (16/0) | (18/1) | 0.00E+00 | 0.00E+00 | 1.21E+04 | 3.55E+07 | 9.88E+05 | 1.18E+07 | 0.00E+00 | 0.00E+00 | 3.13E+06 | 9.79E+04 | 8.36E+07 |
| TC(G16/1/18/2/18/3)~H     | TG | (16/1)  | (18/2) | (18/3) | 0.00E+00 | 0.00E+00 | 0.00E+00 | 2.12E+07 | 3.17E+06 | 7.56E+05 | 6.05E+06 | 0.00E+00 | 1.66E+07 | 0.00E+00 | 0.00E+00 |
| TC(G16/1/18/2/18/3)~NH4   | TG | (16/1)  | (18/2) | (18/3) | 5.49E+06 | 2.70E+07 | 2.84E+07 | 4.29E+09 | 3.95E+09 | 1.15E+10 | 9.24E+05 | 2.75E+09 | 1.01E+09 | 7.45E+09 | 9.88E+09 |
| TC(G18/4/16/1/18/2)~NH4   | TG | (18/4)  | (16/1) | (18/2) | 0.00E+00 | 0.00E+00 | 0.00E+00 | 6.10E+08 | 3.93E+08 | 2.01E+09 | 0.00E+00 | 4.00E+08 | 1.33E+08 | 1.01E+09 | 2.14E+09 |
| TC(G16/01/18/19/0)~NH4    | TG | (16/0)  | (18/1) | (19/0) | 2.96E+07 | 2.76E+07 | 1.17E+08 | 3.02E+08 | 3.35E+08 | 3.94E+08 | 5.52E+06 | 4.80E+08 | 8.22E+08 | 3.81E+08 | 3.58E+08 |
| TC(G16/01/7/0/18/18/1)~H  | TG | (16/0)  | (18/1) | (7/0)  | 8.00E+00 | 0.00E+00 | 0.00E+00 | 6.41E+08 | 3.35E+08 | 2.15E+08 | 0.00E+00 | 3.35E+08 | 2.15E+08 | 0.00E+00 | 0.00E+00 |
| TC(G17/0/18/1/18/1)~NH4   | TG | (17/0)  | (18/1) | (18/1) | 9.04E+07 | 5.00E+07 | 1.06E+08 | 2.72E+09 | 1.64E+09 | 2.64E+09 | 1.34E+07 | 1.34E+09 | 4.63E+08 | 2.17E+09 | 2.31E+09 |
| TC(G17/0/18/1/18/1)~NH4   | TG | (17/0)  | (18/1) | (18/1) | 0.00E+00 | 0.00E+00 | 0.00E+00 | 1.70E+06 | 5.59E+05 | 4.40E+06 | 0.00E+00 | 2.12E+05 | 0.00E+00 | 0.00E+00 | 4.77E+06 |
| TC(G17/1/18/1/18/1)~NH4   | TG | (17/1)  | (18/1) | (18/1) | 9.64E+07 | 6.64E+07 | 1.35E+08 | 1.80E+09 | 1.57E+09 | 1.52E+09 | 2.21E+07 | 1.51E+09 | 4.16E+08 | 1.93E+09 | 1.83E+09 |
| TC(G17/1/18/1/18/1)~NH4   | TG | (17/1)  | (18/1) | (18/1) | 0.00E+00 | 0.00E+00 | 0.00E+00 | 1.17E+06 | 4.79E+05 | 1.87E+06 | 0.00E+00 | 1.27E+05 | 0.00E+00 | 2.64E+06 | 1.99E+06 |
| TC(G17/1/18/1/18/1)~NH4   | TG | (17/1)  | (18/1) | (18/1) | 0.00E+00 | 0.00E+00 | 0.00E+00 | 2.42E+05 | 4.42E+05 | 2.05E+06 | 0.00E+00 | 3.29E+04 | 3.75E+02 | 4.33E+05 | 1.49E+07 |
| TC(G17/1/18/1/18/2)~NH4   | TG | (17/1)  | (18/1) | (18/2) | 5.40E+06 | 2.37E+06 | 1.66E+09 | 1.66E+09 | 1.66E+09 | 1.66E+09 | 1.31E+09 | 1.31E+09 | 1.31E+09 | 1.31E+09 | 1.31E+09 |
| TC(G17/1/18/2/18/2)~NH4   | TG | (17/1)  | (18/2) | (18/2) | 0.00E+00 | 0.00E+00 | 0.00E+00 | 5.08E+07 | 2.93E+07 | 1.75E+08 | 0.00E+00 | 6.18E+06 | 1.83E+06 | 5.84E+07 | 3.39E+08 |
| TC(G17/1/18/2/18/2)~NH4   | TG | (17/1)  | (18/2) | (18/2) | 7.27E+06 | 1.04E+07 | 1.30E+07 | 7.79E+08 | 9.87E+07 | 7.16E+08 | 1.62E+06 | 5.86E+08 | 1.29E+08 | 8.98E+08 | 7.71E+08 |
| TC(G17/1/18/2/18/3)~NH4   | TG | (17/1)  | (18/2) | (18/3) | 4.64E+07 | 3.41E+07 | 6.68E+07 | 1.98E+08 | 9.11E+07 | 2.20E+08 | 5.80E+06 | 1.17E+08 | 4.84E+06 | 1.16E+08 | 1.92E+08 |
| TC(G16/1/17/12/05)~NH4    | TG | (16/1)  | (17/1) | (20/5) | 5.51E+03 | 0.00E+00 | 0.00E+00 | 3.46E+06 | 2.23E+06 | 3.24E+07 | 0.00E+00 | 3.45E+07 | 0.00E+00 | 0.00E+00 | 4.93E+07 |
| TC(G54/1)~NH4             | TG | (54/1)  |        |        | 3.54E+07 | 7.81E+06 | 1.45E+08 | 1.81E+08 | 1.05E+08 | 1.20E+08 | 1.02E+07 | 2.17E+08 | 5.79E+07 | 5.61E+07 | 1.41E+08 |
| TC(G18/01/18/18/1)~H      | TG | (18/0)  | (18/1) | (18/1) | 0.00E+00 | 3.89E+03 | 0.00E+00 | 3.75E+04 | 3.78E+06 | 4.78E+06 | 1.36E+06 | 2.19E+05 | 2.19E+05 | 2.19E+05 | 0.00E+00 |
| TC(G18/01/18/18/1)~H      | TG | (18/0)  | (18/1) | (18/1) | 3.98E+01 | 1.41E+08 | 0.00E+00 | 1.35E+10 | 1.33E+10 | 1.33E+10 | 1.27E+10 | 1.27E+10 | 1.27E+10 | 1.27E+10 | 1.37E+10 |
| TC(G18/01/18/18/1)~NH4    | TG | (18/0)  | (18/1) | (18/1) | 0.00E+00 | 7.11E+04 | 4.51E+04 | 1.56E+07 | 4.17E+06 | 4.65E+08 | 1.05E+03 | 1.83E+05 | 1.69E+05 | 3.71E+08 | 4.49E+08 |
| TC(G18/1/18/18/1)~NH4     | TG | (18/1)  | (18/1) | (18/1) | 0.00E+00 | 0.00E+00 | 0.00E+00 | 0.00E+00 | 2.02E+05 | 3.63E+05 | 1.31E+05 | 5.17E+05 | 1.57E+05 | 4.00E+02 | 2.72E+05 |
| TC(G18/1/18/18/1)~NH4     | TG | (18/1)  | (18/1) | (18/1) | 0.00E+00 | 0.00E+00 | 0.00E+00 | 0.00E+00 | 2.79E+06 | 0.00E+00 | 8.27E+05 | 2.10E+04 | 5.50E+04 | 2.00E+04 | 4.93E+06 |
| TC(G18/1/18/18/1)~NH4     | TG | (18/1)  | (18/1) | (18/1) | 0.00E+00 | 0.00E+00 | 0.00E+00 | 0.00E+00 | 1.96E+06 | 2.15E+06 | 6.91E+05 | 4.00E+00 | 3.40E+05 | 0.00E+00 | 1.16E+06 |
| TC(G18/1/18/18/1)~NH4     | TG | (18/1)  | (18/1) | (18/1) | 0.00E+00 | 0.00E+00 | 0.00E+00 | 0.00E+00 | 0.00E+00 | 9.29E+06 | 0.00E+00 | 0.00E+00 | 2.34E+04 | 0.00E+00 | 1.46E+06 |
| TC(G18/1/18/18/1)~NH4     | TG | (18/1)  | (18/1) | (18/1) | 0.00E+00 | 0.00E+00 | 0.00E+00 | 0.00E+00 | 0.00E+00 | 6.24E+06 | 0.00E+00 | 0.00E+00 | 4.09E+03 | 0.00E+00 | 1.06E+06 |
| TC(G18/1/18/18/1)~NH4     | TG | (18/1)  | (18/1) | (18/1) | 0.00E+00 | 0.00E+00 | 0.00E+00 | 0.00E+00 | 0.00E+00 | 7.94E+05 | 1.38E+06 | 0.00E+00 | 4.49E+05 | 0.00E+00 | 1.07E+07 |
| TC(G18/1/18/18/1)~NH4     | TG | (18/1)  | (18/1) | (18/1) | 0.00E+00 | 0.00E+00 | 0.00E+00 | 0.00E+00 | 0.00E+00 | 0.00E+00 | 5.19E+06 | 0.00E+00 | 0.00E+00 | 0.00E+00 | 1.09E+04 |
| TC(G18/1/18/18/1)~NH4     | TG | (18/1)  | (18/1) | (18/1) | 0.00E+00 | 0.00E+00 | 0.00E+00 | 0.00E+00 | 0.00E+00 | 0.00E+00 | 4.51E+06 | 3.77E+06 | 0.00E+00 | 0.00E+00 | 0.00E+00 |
| TC(G18/1/18/18/1)~NH4     | TG | (18/1)  | (18/1) | (18/1) | 2.01E+06 | 6.36E+05 | 3.42E+06 | 1.27E+08 | 4.83E+08 | 3.65E+08 | 5.97E+05 | 4.23E+08 | 1.64E+08 | 3.10E+08 | 1.03E+08 |
| TC(G18/1/18/18/1)~NH4     | TG | (18/1)  | (18/1) | (18/1) | 2.42E+09 | 1.42E+09 | 3.22E+09 | 2.99E+10 | 4.43E+10 | 1.94E+10 | 5.71E+08 | 2.99E+10 | 1.12E+10 | 3.25E+10 | 2.13E+10 |
| TC(G18/1/18/18/1)~NH4     | TG | (18/1)  | (18/1) | (18/1) | 3.11E+05 | 2.79E+09 | 8.01E+09 | 3.58E+09 |
| TC(G18/1/18/18/1)~NH4     | TG | (18/1)  | (18/1) | (18/1) | 0.00E+00 | 8.20E+04 | 0.00E+00 | 0.00E+00 | 0.00E+00 | 0.00E+00 | 4.78E+06 | 0.00E+00 | 0.00E+00 | 0.00E+00 | 0.00E+00 |
| TC(G18/1/18/18/1)~NH4     | TG | (18/1)  | (18/1) | (18/1) | 0.00E+00 | 0.00E+00 | 0.00E+00 | 0.00E+00 | 0.00E+00 | 9.51E+08 | 1.05E+05 | 0.00E+00 | 3.89E+05 | 4.37E+08 | 2.80E+08 |
| TC(G18/1/18/18/2)~NH4     | TG | (18/1)  | (18/1) | (18/2) | 0.00E+00 | 0.00E+00 | 0.00E+00 | 0.00E+00 | 0.00E+00 | 0.00E+00 | 7.93E+03 | 0.00E+00 | 3.26E+06 | 0.00E+00 | 2.15E+06 |
| TC(G18/1/18/18/2)~NH4     | TG | (18/1)  | (18/1) | (18/2) | 3.51E+09 | 1.70E+09 | 3.60E+09 | 4.11E+10 | 3.02E+10 | 1.25E+10 | 6.45E+08 | 2.72E+10 | 1.06E+10 |          |          |

|                     |       |         |        |          |          |          |          |          |          |          |          |          |          |          |          |
|---------------------|-------|---------|--------|----------|----------|----------|----------|----------|----------|----------|----------|----------|----------|----------|----------|
| dMePE[18:0/18:1]-H  | dMePE | (18:0)  | (18:1) | 1.34E+08 | 9.91E+07 | 9.64E+07 | 3.05E+07 | 2.31E+07 | 8.41E+07 | 2.15E+07 | 5.73E+06 | 4.60E+07 | 4.76E+07 | 6.76E+07 | 7.86E+06 |
| dMePE[16:1/20:4]-H  | dMePE | (16:1)  | (20:4) | 6.89E+05 | 2.35E+06 | 0.00E+00 | 0.00E+00 | 2.02E+06 | 3.79E+06 | 2.01E+06 | 2.59E+06 | 1.70E+06 | 3.36E+05 | 0.00E+00 | 5.90E+06 |
| dMePE[18:3/18:2]-H  | dMePE | (18:3)  | (18:2) | 9.22E+07 | 6.33E+07 | 6.12E+07 | 3.25E+07 | 3.52E+07 | 1.00E+08 | 4.30E+07 | 5.94E+07 | 5.51E+07 | 0.00E+00 | 1.59E+08 | 1.58E+08 |
| dMePE[16:1/20:4]-H  | dMePE | (16:1)  | (20:4) | 2.70E+08 | 5.36E+08 | 3.02E+08 | 6.67E+08 | 8.04E+08 | 6.47E+08 | 4.14E+08 | 5.13E+08 | 5.34E+08 | 1.04E+09 | 1.30E+09 | 1.25E+09 |
| dMePE[16:0/20:5]-H  | dMePE | (16:0)  | (20:5) | 9.76E+08 | 5.96E+08 | 0.00E+00 | 8.68E+08 | 1.11E+09 | 9.60E+08 | 2.31E+08 | 3.24E+08 | 4.54E+08 | 7.45E+08 | 1.22E+09 | 1.02E+09 |
| dMePE[18:1/20:2]-H  | dMePE | (18:1)  | (20:2) | 5.52E+07 | 2.28E+07 | 4.05E+07 | 3.95E+07 | 7.92E+07 | 2.84E+07 | 4.21E+07 | 3.09E+07 | 3.22E+07 | 0.00E+00 | 1.46E+07 | 6.23E+07 |
| dMePE[16:0/22:6]-H  | dMePE | (16:0)  | (22:6) | 9.76E+06 | 0.00E+00 | 4.79E+06 | 1.95E+06 | 3.86E+06 | 6.20E+07 | 1.18E+06 | 1.15E+07 | 3.02E+06 | 4.86E+06 | 1.06E+08 | 1.24E+07 |
| dMePE[18:2/20:4]-H  | dMePE | (18:2)  | (20:4) | 6.41E+06 | 4.52E+07 | 8.36E+07 | 7.34E+07 | 2.00E+08 | 1.16E+08 | 6.28E+07 | 5.96E+07 | 3.22E+07 | 5.00E+07 | 6.54E+07 | 1.30E+08 |
| dMePE[16:0/22:6]-H  | dMePE | (16:0)  | (22:6) | 7.10E+03 | 2.14E+05 | 6.15E+05 | 0.00E+00 | 6.34E+05 | 2.64E+05 | 1.46E+05 | 9.89E+05 | 8.53E+05 | 4.34E+03 | 1.19E+06 | 1.31E+06 |
| dMePE[20:5/18:2]-H  | dMePE | (20:5)  | (18:2) | 1.09E+06 | 1.12E+06 | 1.13E+06 | 2.25E+06 | 1.55E+06 | 0.00E+00 | 2.64E+06 | 6.63E+05 | 7.26E+05 | 1.33E+06 | 3.52E+06 | 0.00E+00 |
| dMePE[18:2p/22:6]-H | dMePE | (18:2p) | (22:6) | 2.97E+07 | 5.50E+06 | 1.03E+07 | 1.84E+06 | 9.89E+06 | 8.49E+06 | 8.69E+06 | 1.16E+06 | 2.10E+07 | 6.68E+06 | 6.60E+06 | 1.12E+07 |
| dMePE[18:2p/22:6]-H | dMePE | (18:2p) | (22:6) | 2.45E+07 | 2.36E+07 | 5.64E+06 | 7.84E+05 | 1.27E+06 | 1.16E+06 | 5.42E+06 | 6.63E+06 | 3.91E+06 | 3.39E+06 | 3.91E+06 | 1.79E+06 |
| dMePE[30:1/16:0]-H  | dMePE | (30:1)  | (16:0) | 0.00E+00 | 0.00E+00 | 0.00E+00 | 3.56E+06 | 0.00E+00 | 2.52E+06 | 0.00E+00 | 0.00E+00 | 0.00E+00 | 4.05E+06 | 4.99E+06 | 6.90E+06 |
| dMePE[30:1/16:1]-H  | dMePE | (30:1)  | (16:1) | 0.00E+00 | 0.00E+00 | 0.00E+00 | 5.25E+06 | 0.00E+00 | 5.64E+06 | 0.00E+00 | 0.00E+00 | 0.00E+00 | 7.04E+06 | 2.96E+06 | 1.40E+07 |
| dMePE[30:1/18:1]-H  | dMePE | (30:1)  | (18:1) | 5.24E+06 | 2.61E+06 | 8.92E+05 | 4.34E+07 | 5.62E+06 | 1.28E+08 | 6.72E+05 | 4.21E+05 | 6.37E+06 | 7.27E+07 | 8.97E+07 | 2.07E+08 |
| dMePE[30:1/18:1]-H  | dMePE | (30:1)  | (18:1) | 4.01E+06 | 4.14E+05 | 4.94E+06 | 0.00E+00 | 2.50E+05 | 1.34E+08 | 3.31E+05 | 0.00E+00 | 0.00E+00 | 7.26E+07 | 4.77E+07 | 5.48E+06 |
| dMePE[32:2/16:1]-H  | dMePE | (32:2)  | (16:1) | 0.00E+00 | 0.00E+00 | 0.00E+00 | 1.45E+07 | 1.79E+06 | 3.66E+07 | 0.00E+00 | 0.00E+00 | 7.74E+05 | 2.66E+07 | 2.27E+07 | 5.51E+07 |
| dMePE[32:1/18:1]-H  | dMePE | (32:1)  | (18:1) | 6.59E+05 | 9.34E+05 | 1.38E+06 | 3.38E+07 | 2.38E+06 | 4.17E+07 | 0.00E+00 | 2.96E+05 | 1.64E+06 | 2.63E+07 | 2.40E+07 | 6.10E+07 |
| dMePE[32:1/18:1]-H  | dMePE | (32:1)  | (18:1) | 3.28E+06 | 1.54E+05 | 1.95E+06 | 3.12E+05 | 0.00E+00 | 0.00E+00 | 0.00E+00 | 3.84E+03 | 0.00E+00 | 2.71E+04 | 2.12E+07 | 0.00E+00 |
| dMePE[50:3]-H       | dMePE | (50:3)  |        | 0.00E+00 | 0.00E+00 | 7.14E+04 | 1.27E+04 | 0.00E+00 | 0.00E+00 | 2.36E+06 | 0.00E+00 | 0.00E+00 | 0.00E+00 | 0.00E+00 | 0.00E+00 |
| dMePE[32:2/18:1]-H  | dMePE | (32:2)  | (18:1) | 0.00E+00 | 2.62E+06 | 4.22E+05 | 4.99E+07 | 1.89E+06 | 9.71E+07 | 0.00E+00 | 0.00E+00 | 1.29E+06 | 2.90E+07 | 9.94E+07 | 1.91E+08 |
| dMePE[32:2/18:2]-H  | dMePE | (32:2)  | (18:2) | 0.00E+00 | 5.07E+05 | 0.00E+00 | 1.13E+07 | 9.39E+05 | 2.12E+07 | 0.00E+00 | 3.11E+05 | 7.58E+05 | 1.01E+07 | 6.23E+06 | 2.17E+08 |
| dMePE[30:1/20:4]-H  | dMePE | (30:1)  | (20:4) | 8.69E+05 | 2.44E+06 | 7.76E+05 | 2.69E+07 | 5.95E+06 | 4.36E+07 | 0.00E+00 | 4.80E+06 | 2.57E+06 | 4.27E+07 | 4.14E+07 | 1.02E+08 |
| dMePE[30:2/20:4]-H  | dMePE | (30:2)  | (20:4) | 0.00E+00 | 0.00E+00 | 0.00E+00 | 2.89E+06 | 0.00E+00 | 9.15E+06 | 0.00E+00 | 0.00E+00 | 0.00E+00 | 2.30E+06 | 8.42E+06 | 9.35E+06 |
| dMePE[34:2/18:1]-H  | dMePE | (34:2)  | (18:1) | 0.00E+00 | 3.59E+05 | 0.00E+00 | 7.12E+06 | 0.00E+00 | 1.70E+07 | 0.00E+00 | 0.00E+00 | 0.00E+00 | 3.57E+06 | 1.07E+07 | 2.39E+07 |
| dMePE[34:3/18:1]-H  | dMePE | (34:3)  | (18:1) | 0.00E+00 | 2.95E+05 | 3.30E+05 | 1.06E+07 | 8.18E+05 | 7.50E+07 | 0.00E+00 | 3.06E+05 | 6.92E+05 | 5.69E+07 | 1.64E+07 | 4.02E+07 |
| dMePE[32:1/20:4]-H  | dMePE | (32:1)  | (20:4) | 3.42E+05 | 3.87E+06 | 2.95E+06 | 3.15E+07 | 3.14E+06 | 3.57E+07 | 2.10E+06 | 4.05E+06 | 0.00E+00 | 3.08E+07 | 2.46E+07 | 9.46E+07 |
| dMePE[32:2/20:4]-H  | dMePE | (32:2)  | (20:4) | 3.62E+05 | 3.82E+05 | 0.00E+00 | 4.89E+07 | 9.01E+05 | 1.61E+08 | 6.34E+05 | 2.16E+06 | 1.93E+06 | 5.93E+07 | 1.22E+08 | 2.52E+08 |
| dMePE[30:1/22:6]-H  | dMePE | (30:1)  | (22:6) | 2.73E+06 | 5.13E+06 | 1.15E+06 | 5.34E+07 | 5.96E+06 | 1.68E+08 | 1.65E+06 | 1.72E+06 | 3.19E+06 | 5.30E+07 | 4.01E+08 | 2.63E+08 |
| dMePE[30:2/22:6]-H  | dMePE | (30:2)  | (22:6) | 0.00E+00 | 0.00E+00 | 0.00E+00 | 3.90E+06 | 0.00E+00 | 1.81E+07 | 0.00E+00 | 0.00E+00 | 0.00E+00 | 3.82E+06 | 1.91E+07 | 3.42E+07 |
| dMePE[34:1/20:4]-H  | dMePE | (34:1)  | (20:4) | 0.00E+00 | 0.00E+00 | 3.14E+05 | 4.58E+06 | 1.33E+06 | 7.37E+06 | 0.00E+00 | 1.29E+06 | 0.00E+00 | 5.39E+06 | 5.86E+06 | 1.33E+07 |
| dMePE[32:1/22:6]-H  | dMePE | (32:1)  | (22:6) | 1.90E+06 | 5.00E+03 | 1.39E+06 | 3.22E+07 | 1.79E+07 | 6.60E+07 | 9.56E+05 | 1.99E+06 | 2.66E+06 | 3.46E+07 | 5.43E+07 | 1.32E+08 |
| dMePE[32:2/22:6]-H  | dMePE | (32:2)  | (22:6) | 1.06E+06 | 1.27E+06 | 0.00E+00 | 5.09E+07 | 1.33E+07 | 1.21E+08 | 0.00E+00 | 0.00E+00 | 5.06E+05 | 4.32E+07 | 1.36E+08 | 2.89E+08 |
| dMePE[32:3/22:6]-H  | dMePE | (32:3)  | (22:6) | 0.00E+00 | 0.00E+00 | 0.00E+00 | 1.07E+07 | 6.15E+06 | 1.37E+07 | 0.00E+00 | 0.00E+00 | 0.00E+00 | 3.39E+06 | 7.28E+06 | 4.10E+07 |
| dMePE[34:1/22:6]-H  | dMePE | (34:1)  | (22:6) | 0.00E+00 | 0.00E+00 | 0.00E+00 | 1.12E+07 | 1.20E+07 | 3.81E+06 | 0.00E+00 | 2.62E+05 | 0.00E+00 | 1.35E+07 | 3.81E+06 | 8.27E+06 |
| dMePE[34:2/22:6]-H  | dMePE | (34:2)  | (22:6) | 6.81E+03 | 0.00E+00 | 0.00E+00 | 0.00E+00 | 1.21E+07 | 5.23E+07 | 0.00E+00 | 0.00E+00 | 0.00E+00 | 2.14E+07 | 7.55E+06 | 3.12E+07 |
| dMePE[34:3/22:6]-H  | dMePE | (34:3)  | (22:6) | 0.00E+00 | 6.23E+03 | 0.00E+00 | 1.34E+07 | 1.76E+07 | 2.24E+07 | 0.00E+00 | 2.80E+05 | 0.00E+00 | 1.21E+07 | 1.26E+07 | 2.96E+07 |
| pHSM(d43:0)+CH3COO  | pHSM  | (d43:0) |        | 0.00E+00 | 0.00E+00 | 6.72E+05 | 0.00E+00 | 0.00E+00 | 0.00E+00 | 4.16E+06 | 0.00E+00 | 4.23E+05 | 0.00E+00 | 0.00E+00 | 0.00E+00 |

Supplementary Table 11: Merge lipidomic results of lipid classes from Supplementary Table 10

| Class      | # of Lipid ions | Pten.KO.chow.1 | Pten.KO.chow.2 | Pten.KO.chow.3 | Pten.KO.HFD.1 | Pten.KO.HFD.2 | Pten.KO.HFD.3 | Pten.Pml.KO.chow.1 | Pten.Pml.KO.chow.2 | Pten.Pml.KO.chow.3 | Pten.Pml.KO.HFD.1 | Pten.Pml.KO.HFD.2 | Pten.Pml.KO.HFD.3 |
|------------|-----------------|----------------|----------------|----------------|---------------|---------------|---------------|--------------------|--------------------|--------------------|-------------------|-------------------|-------------------|
| PC         | 584             | 7.54E+11       | 6.07E+11       | 6.87E+11       | 7.38E+11      | 7.45E+11      | 7.90E+11      | 5.68E+11           | 6.24E+11           | 6.47E+11           | 7.74E+11          | 8.27E+11          | 8.90E+11          |
| SM         | 134             | 2.31E+11       | 1.63E+11       | 2.54E+11       | 1.82E+11      | 1.43E+11      | 2.16E+11      | 1.31E+11           | 1.20E+11           | 2.03E+11           | 2.47E+11          | 2.21E+11          | 3.09E+11          |
| PE         | 246             | 1.49E+11       | 1.12E+11       | 1.36E+11       | 1.52E+11      | 1.38E+11      | 1.79E+11      | 9.74E+10           | 1.04E+11           | 1.19E+11           | 1.85E+11          | 2.05E+11          | 2.06E+11          |
| TG         | 332             | 4.18E+10       | 2.40E+10       | 5.34E+10       | 9.80E+11      | 7.52E+11      | 9.09E+11      | 9.56E+09           | 6.28E+11           | 1.99E+11           | 9.67E+11          | 1.01E+12          | 9.73E+11          |
| PI         | 130             | 1.81E+10       | 1.46E+10       | 1.78E+10       | 2.17E+10      | 2.06E+10      | 2.63E+10      | 8.63E+09           | 1.43E+10           | 1.92E+10           | 2.53E+10          | 3.55E+10          | 3.54E+10          |
| LPC        | 137             | 2.01E+10       | 1.09E+10       | 1.74E+10       | 3.57E+10      | 4.58E+10      | 4.09E+10      | 3.48E+10           | 4.59E+10           | 3.88E+10           | 4.78E+10          | 8.65E+10          | 8.72E+10          |
| DG         | 196             | 1.18E+10       | 1.15E+10       | 1.11E+10       | 1.02E+11      | 1.29E+11      | 1.14E+11      | 8.49E+09           | 4.69E+10           | 2.65E+10           | 1.07E+11          | 1.37E+11          | 8.96E+10          |
| PG         | 105             | 6.51E+09       | 6.46E+09       | 5.56E+09       | 1.78E+10      | 1.78E+10      | 1.92E+10      | 4.03E+09           | 6.38E+09           | 5.35E+09           | 2.24E+10          | 2.91E+10          | 3.82E+10          |
| PEt        | 20              | 5.34E+09       | 4.18E+09       | 6.15E+09       | 1.00E+10      | 1.05E+10      | 7.93E+09      | 4.46E+09           | 8.12E+09           | 5.80E+09           | 9.87E+09          | 8.95E+09          | 9.62E+09          |
| PS         | 324             | 1.93E+09       | 4.13E+09       | 5.75E+09       | 1.71E+10      | 1.19E+10      | 2.04E+10      | 1.08E+10           | 1.19E+10           | 1.04E+10           | 1.64E+10          | 2.21E+10          | 2.83E+10          |
| Cer        | 27              | 2.99E+09       | 3.46E+09       | 2.79E+09       | 6.18E+09      | 7.44E+09      | 8.78E+09      | 2.63E+09           | 5.30E+09           | 4.24E+09           | 8.62E+09          | 9.13E+09          | 1.19E+10          |
| LPE        | 33              | 2.21E+09       | 1.43E+09       | 1.88E+09       | 4.25E+09      | 4.34E+09      | 3.26E+09      | 3.04E+09           | 3.87E+09           | 3.66E+09           | 4.96E+09          | 7.48E+09          | 8.44E+09          |
| dMePE      | 43              | 1.67E+09       | 1.64E+09       | 6.70E+08       | 2.30E+09      | 2.43E+09      | 3.33E+09      | 8.78E+08           | 1.13E+09           | 1.24E+09           | 2.59E+09          | 4.20E+09          | 4.85E+09          |
| PA         | 4               | 8.78E+08       | 5.77E+08       | 1.90E+09       | 3.05E+09      | 3.23E+09      | 1.88E+09      | 1.08E+09           | 2.02E+09           | 1.42E+09           | 2.52E+09          | 2.27E+09          | 2.03E+09          |
| MG         | 19              | 3.96E+08       | 1.17E+09       | 7.88E+08       | 7.27E+08      | 2.43E+09      | 2.34E+09      | 6.23E+08           | 1.19E+09           | 1.08E+09           | 2.18E+09          | 4.18E+09          | 2.81E+09          |
| CerG1      | 7               | 7.95E+08       | 5.99E+08       | 6.99E+08       | 8.45E+08      | 5.82E+08      | 1.99E+09      | 1.74E+09           | 1.30E+09           | 8.99E+08           | 1.76E+09          | 1.86E+09          | 2.27E+09          |
| ChE        | 7               | 9.65E+08       | 5.01E+08       | 6.00E+08       | 4.72E+06      | 6.52E+04      | 9.28E+06      | 1.36E+09           | 1.89E+08           | 1.04E+09           | 3.02E+07          | 5.21E+07          | 8.32E+06          |
| So         | 4               | 6.49E+08       | 2.50E+08       | 2.64E+08       | 3.06E+08      | 1.40E+08      | 6.41E+08      | 1.12E+08           | 2.94E+08           | 3.71E+08           | 4.97E+08          | 6.58E+08          | 7.49E+08          |
| PMe        | 12              | 1.92E+08       | 1.92E+08       | 7.99E+07       | 7.34E+07      | 3.16E+07      | 1.60E+08      | 3.25E+07           | 3.05E+07           | 8.90E+07           | 1.02E+08          | 1.40E+08          | 4.87E+08          |
| MGDG       | 1               | 2.13E+08       | 8.45E+07       | 1.64E+08       | 6.19E+07      | 0.00E+00      | 1.28E+08      | 3.11E+07           | 3.33E+07           | 4.67E+07           | 9.06E+07          | 3.44E+08          | 0.00E+00          |
| CerG3      | 13              | 1.62E+08       | 1.98E+08       | 3.30E+07       | 1.21E+09      | 1.31E+07      | 3.83E+09      | 2.73E+07           | 4.55E+07           | 7.64E+07           | 1.14E+09          | 3.29E+09          | 6.13E+09          |
| LPG        | 21              | 9.85E+07       | 1.78E+08       | 9.59E+07       | 2.82E+08      | 1.14E+09      | 3.72E+08      | 1.08E+08           | 1.55E+08           | 9.84E+07           | 7.52E+08          | 5.90E+08          | 7.35E+08          |
| LPI        | 13              | 9.35E+07       | 3.35E+07       | 1.66E+08       | 2.13E+08      | 4.58E+08      | 9.76E+07      | 1.70E+08           | 3.04E+08           | 2.06E+08           | 3.31E+08          | 4.32E+08          | 4.12E+08          |
| OAFA       | 10              | 6.36E+07       | 5.97E+07       | 5.07E+07       | 7.47E+08      | 5.20E+08      | 9.75E+08      | 1.21E+08           | 2.42E+08           | 9.64E+07           | 5.93E+08          | 4.45E+08          | 9.34E+08          |
| CerG3GNAC1 | 6               | 6.26E+07       | 4.46E+07       | 3.14E+07       | 1.04E+08      | 6.65E+07      | 1.47E+08      | 2.99E+08           | 1.97E+08           | 1.39E+08           | 2.70E+08          | 3.50E+08          | 2.14E+08          |
| CerG2      | 6               | 2.70E+07       | 1.79E+07       | 2.27E+07       | 2.17E+07      | 6.54E+07      | 1.02E+08      | 3.12E+08           | 9.26E+07           | 8.52E+07           | 1.10E+08          | 8.03E+07          | 1.12E+08          |
| LdMePE     | 5               | 6.92E+06       | 2.45E+06       | 1.51E+07       | 4.09E+07      | 6.61E+07      | 6.64E+07      | 3.45E+07           | 9.72E+07           | 4.85E+07           | 6.67E+07          | 1.28E+08          | 1.71E+08          |
| CL         | 12              | 7.93E+06       | 9.17E+06       | 6.70E+06       | 5.92E+06      | 1.40E+07      | 5.11E+07      | 9.89E+06           | 1.21E+07           | 1.76E+07           | 2.44E+07          | 1.17E+08          | 1.34E+08          |
| LPMe       | 2               | 6.92E+06       | 2.45E+06       | 1.51E+07       | 4.09E+07      | 6.61E+07      | 6.64E+07      | 3.45E+07           | 9.72E+07           | 4.85E+07           | 6.67E+07          | 1.28E+08          | 1.71E+08          |
| PIP2       | 2               | 5.33E+06       | 4.77E+05       | 4.62E+06       | 3.01E+05      | 0.00E+00      | 2.44E+06      | 5.36E+05           | 8.86E+04           | 4.47E+05           | 7.54E+05          | 5.90E+06          | 5.79E+06          |
| CerG3GNAC2 | 1               | 5.77E+06       | 3.67E+06       | 0.00E+00       | 1.09E+07      | 1.87E+07      | 2.07E+07      | 3.11E+06           | 3.43E+07           | 7.59E+06           | 3.17E+07          | 6.22E+07          | 2.60E+07          |
| cPA        | 3               | 2.38E+06       | 0.00E+00       | 8.42E+05       | 3.13E+06      | 5.36E+06      | 2.99E+06      | 0.00E+00           | 2.94E+06           | 4.77E+05           | 9.97E+05          | 8.59E+06          | 1.68E+07          |
| LPS        | 1               | 5.55E+04       | 8.45E+05       | 2.80E+05       | 1.31E+06      | 4.78E+05      | 2.20E+06      | 1.67E+06           | 2.27E+05           | 5.99E+05           | 1.08E+06          | 4.80E+06          | 3.11E+06          |
| phSM       | 1               | 0.00E+00       | 0.00E+00       | 6.72E+05       | 0.00E+00      | 0.00E+00      | 0.00E+00      | 4.16E+06           | 0.00E+00           | 4.23E+05           | 0.00E+00          | 0.00E+00          | 0.00E+00          |
| LPEt       | 2               | 5.34E+04       | 0.00E+00       | 1.45E+05       | 1.74E+06      | 1.31E+06      | 2.35E+06      | 9.05E+05           | 5.01E+06           | 4.81E+05           | 4.94E+06          | 5.92E+06          | 1.02E+07          |
| PIP        | 2               | 0.00E+00       | 0.00E+00       | 8.50E+04       | 0.00E+00      | 6.92E+04      | 3.18E+05      | 0.00E+00           | 1.20E+05           | 0.00E+00           | 3.95E+05          | 1.31E+06          | 3.13E+06          |

Supplementary Table 12: Merge lipidomic results of chain types from Supplementary Table 10

| FA Chain Type | Pten.KO.chow.1 | Pten.KO.chow.2 | Pten.KO.chow.3 | Pten.KO.HFD.1 | Pten.KO.HFD.2 | Pten.KO.HFD.3 | Pten.Pml.KO.chow.1 | Pten.Pml.KO.chow.2 | Pten.Pml.KO.chow.3 | Pten.Pml.KO.HFD.1 | Pten.Pml.KO.HFD.2 | Pten.Pml.KO.HFD.3 |
|---------------|----------------|----------------|----------------|---------------|---------------|---------------|--------------------|--------------------|--------------------|-------------------|-------------------|-------------------|
| 18:1          | 5.21E+11       | 4.00E+11       | 6.04E+11       | 1.81E+12      | 1.57E+12      | 1.49E+12      | 3.20E+11           | 1.12E+12           | 6.00E+11           | 1.78E+12          | 1.80E+12          | 1.85E+12          |
| 16:0          | 3.41E+11       | 2.60E+11       | 3.13E+11       | 7.37E+11      | 6.38E+11      | 8.15E+11      | 2.68E+11           | 5.77E+11           | 4.12E+11           | 6.30E+11          | 8.29E+11          | 7.71E+11          |
| 20:4          | 1.56E+11       | 1.26E+11       | 1.41E+11       | 2.16E+11      | 2.54E+11      | 2.48E+11      | 1.57E+11           | 2.41E+11           | 2.09E+11           | 2.69E+11          | 2.79E+11          | 2.74E+11          |
| 16:1          | 1.12E+11       | 9.32E+10       | 1.05E+11       | 4.34E+11      | 3.97E+11      | 5.19E+11      | 5.82E+10           | 2.97E+11           | 1.52E+11           | 4.75E+11          | 5.85E+11          | 5.28E+11          |
| 18:0          | 1.06E+11       | 9.08E+10       | 1.06E+11       | 1.93E+11      | 1.97E+11      | 1.99E+11      | 1.14E+11           | 1.91E+11           | 1.79E+11           | 2.52E+11          | 2.67E+11          | 2.77E+11          |
| d18:1         | 1.06E+11       | 6.95E+10       | 8.85E+10       | 1.14E+11      | 9.07E+10      | 1.46E+11      | 8.23E+10           | 1.86E+10           | 1.29E+11           | 1.55E+11          | 1.50E+11          | 1.98E+11          |
| 18:2          | 8.79E+10       | 7.28E+10       | 9.43E+10       | 5.85E+11      | 5.27E+11      | 5.29E+11      | 5.56E+10           | 3.51E+11           | 1.49E+11           | 5.87E+11          | 5.41E+11          | 5.93E+11          |
| 22:6          | 9.47E+10       | 6.45E+10       | 7.90E+10       | 6.25E+10      | 5.97E+10      | 1.22E+11      | 5.47E+10           | 7.46E+10           | 1.04E+11           | 9.39E+10          | 1.54E+11          | 1.62E+11          |
| d24:0         | 5.99E+10       | 5.62E+10       | 1.01E+11       | 2.11E+10      | 1.20E+10      | 2.06E+10      | 1.01E+10           | 5.18E+09           | 2.31E+10           | 2.14E+10          | 1.89E+10          | 2.27E+10          |
| 16:0p         | 7.48E+10       | 4.84E+10       | 6.85E+10       | 6.36E+10      | 5.24E+10      | 7.30E+10      | 4.31E+10           | 6.03E+10           | 5.08E+10           | 8.46E+10          | 9.03E+10          | 9.27E+10          |
| 34:1          | 6.65E+10       | 5.02E+10       | 6.44E+10       | 4.74E+10      | 3.83E+10      | 6.48E+10      | 4.28E+10           | 3.88E+10           | 4.93E+10           | 1.83E+10          | 8.42E+07          | 7.59E+10          |
| 24:1          | 4.54E+10       | 3.42E+10       | 4.01E+10       | 3.43E+10      | 2.57E+10      | 6.50E+10      | 3.54E+10           | 3.10E+10           | 4.22E+10           | 4.96E+10          | 6.96E+10          | 1.02E+11          |
| 20:3          | 3.81E+10       | 3.62E+10       | 4.42E+10       | 8.41E+10      | 7.22E+10      | 4.92E+10      | 3.20E+10           | 3.80E+10           | 3.80E+10           | 4.48E+10          | 7.43E+10          | 6.24E+10          |
| 18:1p         | 3.23E+10       | 2.97E+10       | 3.43E+10       | 3.00E+10      | 1.76E+10      | 4.32E+10      | 2.31E+10           | 1.84E+10           | 2.23E+10           | 3.32E+10          | 3.98E+10          | 4.59E+10          |
| 34:2          | 5.21E+10       | 4.28E+10       | 0.00E+00       | 7.12E+06      | 1.21E+07      | 6.92E+07      | 2.80E+10           | 0.00E+00           | 0.00E+00           | 2.50E+07          | 1.82E+07          | 5.51E+07          |
| 18:0p         | 3.24E+10       | 2.27E+10       | 2.28E+10       | 3.48E+10      | 4.48E+10      | 3.16E+10      | 1.94E+10           | 2.82E+10           | 3.10E+10           | 4.42E+10          | 3.38E+10          | 2.98E+10          |
| 16:0e         | 3.26E+10       | 1.93E+10       | 2.25E+10       | 3.17E+10      | 2.67E+10      | 4.08E+10      | 1.90E+10           | 1.71E+10           | 2.44E+10           | 3.42E+10          | 4.20E+10          | 3.75E+10          |
| 32:0          | 2.62E+10       | 2.05E+10       | 1.92E+10       | 2.42E+10      | 2.75E+10      | 2.78E+10      | 3.31E+10           | 2.96E+10           | 2.94E+10           | 5.63E+10          | 2.68E+07          | 3.15E+07          |
| 20:1          | 1.53E+10       | 1.39E+10       | 1.30E+10       | 1.59E+10      | 1.41E+10      | 1.42E+10      | 4.21E+09           | 1.31E+10           | 7.16E+09           | 1.81E+10          | 1.91E+10          | 1.78E+10          |
| 15:0          | 1.10E+10       | 1.13E+10       | 1.99E+10       | 1.24E+10      | 1.38E+10      | 1.81E+10      | 1.34E+10           | 2.17E+10           | 1.46E+10           | 2.34E+10          | 1.50E+10          | 1.28E+10          |
| d40:1         | 1.52E+10       | 1.08E+10       | 1.38E+10       | 6.58E+09      | 8.86E+09      | 9.78E+09      | 7.11E+09           | 7.11E+09           | 1.31E+10           | 1.41E+10          | 1.16E+10          | 1.36E+08          |
| d22:0         | 1.89E+10       | 2.17E+09       | 1.63E+10       | 1.12E+10      | 1.15E+10      | 1.48E+10      | 8.86E+09           | 9.59E+09           | 1.50E+10           | 1.48E+10          | 1.69E+10          | 2.39E+10          |
| 22:4          | 1.06E+10       | 8.50E+09       | 1.53E+10       | 1.72E+10      | 1.54E+10      | 1.29E+10      | 7.57E+09           | 9.94E+09           | 1.11E+10           | 1.94E+10          | 1.88E+10          | 1.83E+10          |
| 34:1e         | 1.29E+10       | 7.60E+09       | 1.02E+10       | 1.00E+10      | 7.33E+09      | 1.24E+10      | 7.66E+09           | 5.59E+09           | 6.17E+09           | 1.39E+10          | 1.24E+10          | 1.35E+10          |
| d41:1         | 1.26E+10       | 6.55E+09       | 1.10E+10       | 6.99E+09      | 4.97E+09      | 5.67E+09      | 8.27E+09           | 3.45E+09           | 6.74E+09           | 9.20E+09          | 6.98E+09          | 5.84E+09          |
| 15:1          | 1.01E+10       | 9.33E+09       | 8.50E+09       | 2.11E+10      | 1.40E+10      | 2.64E+10      | 5.70E+09           | 8.91E+09           | 7.78E+09           | 1.99E+10          | 2.23E+10          | 2.58E+10          |
| 22:5          | 8.02E+09       | 9.33E+09       | 9.55E+09       | 1.14E+10      | 1.39E+10      | 1.31E+10      | 1.52E+10           | 1.48E+10           | 1.42E+10           | 1.58E+10          | 1.91E+10          | 1.89E+10          |
| 31:1p         | 8.64E+09       | 5.45E+09       | 9.66E+09       | 4.35E+09      | 2.47E+09      | 3.27E+09      | 3.30E+09           | 3.47E+09           | 3.94E+09           | 6.87E+09          | 6.88E+09          | 7.48E+09          |
| 24:2          | 8.81E+09       | 6.77E+09       | 6.46E+09       | 1.32E+10      | 7.13E+09      | 6.23E+09      | 7.93E+09           | 6.23E+09           | 2.77E+10           | 1.95E+10          | 7.99E+09          | 2.29E+10          |
| 18:0e         | 8.34E+09       | 7.75E+09       | 5.43E+09       | 5.19E+09      | 3.24E+09      | 1.28E+10      | 3.49E+09           | 2.35E+09           | 3.22E+09           | 1.06E+10          | 7.84E+09          | 1.02E+10          |
| d42:1         | 2.75E+09       | 3.13E+09       | 1.42E+10       | 9.38E+09      | 3.63E+09      | 7.50E+09      | 2.34E+09           | 4.41E+09           | 4.53E+09           | 1.28E+10          | 6.90E+09          | 2.79E+10          |
| 22:1          | 5.41E+09       | 4.40E+09       | 6.93E+09       | 3.06E+09      | 4.51E+09      | 5.79E+09      | 2.70E+09           | 2.49E+09           | 3.14E+09           | 8.37E+09          | 7.23E+09          | 7.80E+09          |
| d17:1         | 6.86E+09       | 4.74E+09       | 4.41E+09       | 9.81E+09      | 8.48E+09      | 1.14E+10      | 4.22E+09           | 6.12E+09           | 6.58E+09           | 1.46E+10          | 1.24E+10          | 1.46E+10          |
| 14:0          | 5.29E+09       | 5.49E+09       | 4.78E+09       | 1.61E+10      | 1.59E+10      | 2.07E+10      | 5.11E+09           | 1.55E+10           | 9.51E+09           | 1.62E+10          | 2.07E+10          | 1.56E+10          |
| 17:0          | 4.82E+09       | 3.60E+09       | 5.27E+09       | 1.29E+10      | 1.04E+10      | 8.89E+09      | 5.35E+09           | 8.37E+09           | 5.43E+09           | 1.10E+10          | 9.08E+09          | 8.20E+09          |
| 6:0           | 4.40E+09       | 2.98E+09       | 5.65E+09       | 1.95E+11      | 1.07E+11      | 1.97E+11      | 1.12E+09           | 9.33E+10           | 2.26E+10           | 2.12E+11          | 2.58E+11          | 1.95E+11          |
| 20:5          | 4.32E+09       | 3.99E+09       | 3.49E+09       | 2.90E+09      | 2.32E+09      | 4.73E+09      | 1.61E+09           | 3.70E+09           | 3.23E+09           | 2.87E+09          | 6.26E+09          | 6.02E+09          |
| 20:0          | 3.36E+09       | 2.42E+09       | 4.74E+09       | 8.78E+09      | 2.60E+09      | 5.74E+09      | 3.26E+09           | 5.01E+09           | 7.12E+09           | 7.92E+09          | 3.32E+09          | 8.64E+09          |
| 33:1          | 3.64E+09       | 2.93E+09       | 3.44E+09       | 2.09E+09      | 0.00E+00      | 3.23E+09      | 2.36E+09           | 2.15E+09           | 1.05E+09           | 3.46E+09          | 3.79E+09          | 1.37E+09          |
| 20:2          | 4.23E+09       | 2.01E+09       | 3.30E+09       | 5.85E+09      | 6.44E+09      | 6.70E+09      | 2.68E+09           | 5.77E+09           | 7.15E+09           | 6.81E+09          | 1.17E+10          | 9.33E+09          |
| 44:6          | 2.78E+09       | 2.37E+09       | 4.22E+09       | 6.49E+09      | 6.86E+09      | 3.74E+09      | 2.34E+09           | 3.79E+09           | 2.76E+09           | 5.24E+09          | 4.71E+09          | 4.59E+09          |
| 13:0          | 3.09E+09       | 3.13E+09       | 3.05E+09       | 1.31E+10      | 7.51E+09      | 1.59E+10      | 2.53E+09           | 7.98E+09           | 3.93E+09           | 1.70E+10          | 1.94E+10          | 1.84E+10          |
| 37:6          | 3.45E+09       | 2.37E+09       | 2.82E+09       | 7.78E+08      | 8.52E+08      | 2.35E+09      | 9.26E+08           | 3.87E+09           | 1.38E+09           | 3.82E+09          | 1.37E+09          | 2.00E+09          |
| 24:0          | 3.56E+09       | 1.89E+09       | 3.06E+09       | 2.15E+09      | 6.70E+08      | 4.53E+09      | 1.37E+09           | 8.65E+08           | 1.81E+09           | 2.60E+09          | 4.92E+09          | 7.30E+09          |
| 35:6          | 4.27E+09       | 1.59E+08       | 3.67E+09       | 3.74E+09      | 3.03E+09      | 4.69E+09      | 4.38E+09           | 3.65E+09           | 3.79E+09           | 3.78E+09          | 3.90E+09          | 5.69E+09          |
| 23:1          | 2.90E+09       | 1.66E+09       | 3.51E+09       | 3.76E+10      | 2.45E+10      | 3.42E+10      | 1.08E+09           | 1.46E+10           | 8.74E+09           | 4.56E+10          | 3.79E+10          | 3.94E+10          |
| d34:0         | 3.10E+09       | 2.52E+09       | 2.38E+09       | 5.01E+09      | 5.46E+09      | 5.02E+09      | 2.41E+09           | 3.65E+09           | 3.63E+09           | 6.77E+09          | 4.06E+09          | 2.82E+09          |
| 32:1e         | 3.16E+09       | 2.07E+09       | 2.64E+09       | 2.80E+09      | 8.90E+08      | 2.74E+09      | 1.20E+09           | 1.25E+09           | 1.53E+09           | 3.25E+09          | 3.86E+09          | 3.91E+09          |
| 31:0          | 1.90E+09       | 2.00E+09       | 3.05E+09       | 8.78E+08      | 4.31E+09      | 5.78E+08      | 1.85E+09           | 3.11E+09           | 6.66E+09           | 1.54E+09          | 2.69E+09          | 7.05E+07          |
| d34:1         | 8.80E+05       | 6.67E+09       | 1.25E+07       | 1.51E+07      | 7.73E+07      | 8.10E+06      | 6.25E+09           | 2.95E+07           | 2.67E+07           | 4.62E+07          | 5.03E+06          | 2.04E+10          |
| 22:0          | 2.75E+09       | 2.17E+09       | 1.53E+09       | 1.35E+09      | 1.25E+09      | 2.30E+09      | 1.06E+09           | 4.42E+08           | 1.49E+09           | 2.31E+09          | 2.19E+09          | 3.99E+09          |
| 33:1p         | 1.69E+09       | 1.51E+09       | 2.96E+09       | 1.30E+09      | 3.11E+09      | 9.43E+08      | 8.02E+08           | 1.66E+09           | 1.98E+09           | 2.01E+09          | 1.29E+09          | 9.06E+08          |
| 39:2p         | 2.39E+09       | 8.18E+08       | 2.66E+09       | 1.41E+09      | 6.68E+08      | 1.26E+09      | 7.23E+08           | 1.38E+09           | 1.54E+09           | 2.72E+09          | 2.55E+09          | 1.77E+09          |
| d25:0         | 2.83E+09       | 1.37E+09       | 1.57E+09       | 9.47E+08      | 1.82E+08      | 2.28E+08      | 1.74E+09           | 9.21E+07           | 2.16E+08           | 5.96E+08          | 4.55E+08          | 1.04E+09          |
| 8:0           | 2.59E+09       | 1.13E+09       | 1.73E+09       | 4.24E+09      | 3.87E+09      | 3.82E+09      | 1.93E+08           | 3.77E+09           | 2.79E+08           | 4.26E+09          | 3.34E+09          | 3.36E+09          |
| 17:01         | 1.06E+09       | 1.29E+09       | 2.16E+09       | 1.88E+10      | 1.18E+10      | 1.86E+10      | 3.98E+08           | 8.89E+09           | 2.75E+09           | 1.96E+10          | 1.89E+10          | 1.67E+10          |
| 19:0          | 1.54E+09       | 1.12E+09       | 1.66E+09       | 9.67E+08      | 3.37E+09      | 1.62E+09      | 4.79E+08           | 2.65E+09           | 1.67E+09           | 2.71E+09          | 1.59E+09          | 2.74E+09          |
| 34:2p         | 1.05E+09       | 1.47E+09       | 1.33E+09       | 5.67E+09      | 4.48E+09      | 7.70E+09      | 4.77E+08           | 3.24E+09           | 1.22E+09           | 4.48E+09          | 6.84E+09          | 6.28E+09          |
| d40:2         | 2.65E+09       | 6.60E+08       | 3.82E+08       | 2.31E+08      | 1.33E+09      | 1.01E+09      | 3.40E+08           | 9.54E+07           | 7.18E+08           | 2.05E+09          | 1.18E+08          | 2.36E+09          |
| 21:1          | 1.17E+09       | 7.30E+08       | 1.78E+09       | 6.45E+10      | 4.82E+10      | 5.83E+10      | 2.63E+08           | 4.65E+10           | 5.75E+09           | 7.35E+10          | 7.98E+10          | 1.52E+10          |
| 24:4          | 1.05E+09       | 8.75E+08       | 1.69E+09       | 4.72E+08      | 1.33E+09      | 7.18E+08      | 1.10E+09           | 7.36E+08           | 1.22E+09           | 1.70E+09          | 1.57E+09          | 8.57E+08          |
| 38:6p         | 2.28E+07       | 1.52E+09       | 2.07E+09       | 7.45E+08      | 4.80E+08      | 3.21E+08      | 5.05E+07           | 2.15E+08           | 1.73E+08           | 9.32E+08          | 1.02E+08          | 5.65E+08          |
| 40:6p         | 2.03E+09       | 7.68E+08       | 7.89E+08       | 1.59E+09      | 8.56E+08      | 1.37E+09      | 1.36E+09           | 4.68E+08           | 1.48E+09           | 8.41E+08          | 8.79E+08          | 7.98E+08          |
| 18:2p         | 1.11E+09       | 1.09E+09       | 1.34E+09       | 8.16E+08      | 9.94E+08      | 1.14E+09      | 1.77E+09           | 7.84E+08           | 7.91E+08           | 1.52E+09          | 1.47E+09          | 1.31E+09          |
| 40:9          | 1.48E+09       | 9.43E+08       | 1.10E+09       | 3.91E+08      | 9.41E+08      | 6.32E+08      | 1.01E+09           | 1.28E+09           | 9.44E+08           | 1.13E+09          | 7.94E+08          | 7.94E+08          |
| 37:5          | 1.48E+09       | 5.49E+08       | 1.30E+09       | 1.06E+09      | 1.85E+09      | 9.46E+08      | 1.70E+09           | 1.80E+09           | 2.13E+09           | 1.80E+09          | 1.58E+09          | 1.23E+09          |
| 28:6          | 8.69E+08       | 5.59E+08       | 1.90E+09       | 3.04E+09      | 3.22E+09      | 1.87E+09      | 1.07E+09           | 2.01E+09           | 1.41E+09           | 2.51E+09          | 2.27E+09          | 2.03E+09          |
| 21:0          | 1.19E+09       | 8.01E+08       | 1.22E+09       | 2.77E+10      | 8.02E+09      | 2.20E+10      | 2.87E+08           | 1.52E+10           | 3.51E+09           | 2.46E+10          | 3.87E+10          | 3.12E+10          |
| d43:1         | 1.29E+09       | 5.55E+08       | 1.35E+09       | 1.67E+08      | 7.00E+07      | 2.30E+08      | 2.86E+08           | 6.62E+07           | 5.10E+08           | 5.54E+08          | 1.22E+08          | 5.42E+07          |
| 35:3p         | 7.58E+08       | 6.94E+08       | 1.72E+09       | 8.35E+08      | 6.09E+08      | 3.36E+08      | 6.97E+08           | 5.46E+08           | 1.19E+09           | 1.03E+07          | 1.16E+09          | 4.19E+08          |
| 37:7          | 1.34E+09       | 7.89E+08       | 9.64E+08       | 1.88E+08      | 6.75E+08      | 0.00E+00      | 5.62E+08           | 8.94E+08           | 2.77E+08           | 2.69E+08          | 6.15E+08          | 5.39E+08          |
| 33:2          | 9.86E+08       | 7.67E+08       | 1.31E+09       | 0.            |               |               |                    |                    |                    |                   |                   |                   |

|        |          |          |          |          |          |          |          |          |          |          |          |          |
|--------|----------|----------|----------|----------|----------|----------|----------|----------|----------|----------|----------|----------|
| d44:4  | 3.94E+08 | 0.00E+00 | 9.38E+08 | 4.59E+06 | 0.00E+00 | 3.59E+06 | 0.00E+00 | 0.00E+00 | 3.92E+07 | 2.19E+06 | 1.37E+05 | 2.22E+06 |
| 40:6e  | 5.47E+08 | 2.54E+08 | 5.05E+08 | 3.56E+08 | 6.69E+08 | 4.25E+08 | 5.20E+08 | 5.76E+08 | 3.70E+08 | 9.88E+08 | 7.06E+08 | 8.71E+08 |
| 19:1   | 5.62E+08 | 3.07E+08 | 3.51E+08 | 2.82E+09 | 1.53E+09 | 2.30E+09 | 1.69E+08 | 1.90E+09 | 2.90E+08 | 2.77E+09 | 2.42E+09 | 2.12E+09 |
| 34:3   | 4.38E+07 | 6.68E+08 | 4.65E+08 | 3.54E+08 | 1.00E+08 | 8.86E+08 | 2.44E+08 | 2.20E+08 | 2.59E+08 | 5.28E+08 | 1.07E+09 | 9.59E+08 |
| 40:3p  | 6.38E+08 | 2.72E+08 | 2.37E+08 | 2.82E+08 | 6.95E+08 | 1.09E+09 | 4.77E+08 | 1.58E+08 | 7.82E+08 | 1.34E+09 | 1.34E+09 | 1.13E+09 |
| 34:3p  | 4.35E+08 | 2.47E+08 | 4.41E+08 | 1.82E+09 | 2.92E+09 | 4.68E+09 | 1.10E+08 | 1.85E+09 | 5.22E+08 | 3.37E+09 | 7.25E+09 | 5.09E+09 |
| 21:2   | 3.13E+08 | 1.59E+08 | 5.46E+08 | 4.40E+10 | 9.08E+09 | 4.59E+10 | 8.27E+07 | 6.95E+09 | 1.97E+09 | 4.66E+10 | 6.68E+10 | 7.45E+10 |
| 44:3p  | 5.19E+08 | 2.25E+08 | 2.60E+08 | 1.81E+07 | 1.65E+07 | 0.00E+00 | 1.28E+08 | 3.20E+07 | 1.91E+08 | 4.67E+07 | 3.06E+07 | 1.03E+07 |
| 40:7p  | 4.46E+08 | 2.11E+08 | 2.66E+08 | 5.80E+08 | 2.06E+08 | 5.94E+08 | 2.95E+08 | 2.15E+08 | 1.64E+08 | 6.67E+08 | 3.60E+08 | 3.37E+08 |
| 32:1p  | 2.85E+08 | 1.90E+08 | 4.32E+08 | 5.18E+08 | 8.92E+07 | 9.13E+08 | 1.63E+07 | 3.04E+08 | 2.26E+08 | 4.16E+08 | 4.51E+08 | 7.15E+08 |
| 44:12  | 3.14E+08 | 2.77E+08 | 2.84E+08 | 5.57E+08 | 2.68E+08 | 8.60E+08 | 1.01E+08 | 7.79E+07 | 1.41E+08 | 8.05E+08 | 2.03E+09 | 2.44E+09 |
| 14:0p  | 2.83E+08 | 1.94E+08 | 3.88E+08 | 2.65E+07 | 1.34E+07 | 3.58E+07 | 5.78E+07 | 8.20E+07 | 9.09E+07 | 7.29E+07 | 4.55E+07 | 6.64E+07 |
| 34:5   | 2.33E+08 | 4.23E+08 | 2.01E+08 | 4.11E+07 | 8.74E+07 | 9.02E+07 | 8.53E+07 | 1.23E+08 | 1.24E+08 | 1.56E+08 | 1.84E+08 | 1.24E+08 |
| 37:1   | 3.31E+08 | 2.00E+08 | 3.17E+08 | 2.30E+07 | 1.09E+08 | 1.03E+08 | 1.37E+08 | 7.56E+07 | 2.85E+08 | 4.43E+07 | 8.92E+07 | 1.17E+08 |
| 35:3   | 2.63E+08 | 4.56E+07 | 4.31E+08 | 1.49E+07 | 1.25E+06 | 4.87E+06 | 5.47E+06 | 1.17E+07 | 1.26E+07 | 7.03E+06 | 5.80E+06 | 1.86E+06 |
| 33:6   | 2.49E+08 | 3.10E+07 | 4.41E+08 | 2.00E+07 | 1.96E+07 | 2.94E+07 | 5.26E+07 | 2.31E+08 | 3.09E+08 | 5.53E+07 | 4.63E+07 | 7.28E+07 |
| d22:1  | 3.46E+08 | 1.96E+08 | 1.79E+08 | 1.06E+09 | 3.73E+08 | 2.28E+09 | 4.64E+07 | 1.23E+08 | 1.50E+08 | 1.37E+09 | 2.14E+09 | 3.51E+09 |
| 30:0e  | 1.72E+08 | 1.43E+08 | 4.06E+08 | 1.44E+08 | 1.41E+08 | 2.94E+08 | 3.85E+07 | 3.72E+07 | 1.85E+07 | 1.67E+08 | 1.77E+08 | 3.30E+08 |
| 18:4   | 1.33E+08 | 5.43E+08 | 3.32E+07 | 1.29E+09 | 8.96E+08 | 2.77E+09 | 9.29E+05 | 5.72E+08 | 1.78E+08 | 1.59E+09 | 2.52E+09 | 1.85E+09 |
| 36:2p  | 2.05E+08 | 2.86E+08 | 1.81E+08 | 5.65E+08 | 3.37E+08 | 8.65E+08 | 8.28E+07 | 2.53E+08 | 1.91E+08 | 6.71E+08 | 5.73E+08 | 5.40E+08 |
| 44:2p  | 6.34E+07 | 2.11E+08 | 3.56E+08 | 5.10E+07 | 4.54E+07 | 1.32E+07 | 4.69E+07 | 1.45E+08 | 3.15E+08 | 2.57E+07 | 2.81E+08 | 3.27E+07 |
| d41:2  | 0.00E+00 | 6.30E+08 | 0.00E+00 | 1.96E+08 | 4.36E+07 | 8.24E+07 | 0.00E+00 | 0.00E+00 | 0.00E+00 | 0.00E+00 | 0.00E+00 | 0.00E+00 |
| 20:0p  | 3.00E+08 | 2.42E+08 | 8.62E+07 | 1.24E+08 | 2.22E+08 | 8.24E+07 | 6.13E+07 | 1.31E+08 | 2.08E+08 | 2.68E+08 | 1.29E+08 | 7.97E+07 |
| d44:2  | 2.84E+08 | 1.47E+08 | 1.77E+08 | 5.69E+06 | 1.17E+07 | 3.65E+07 | 2.45E+08 | 1.91E+07 | 3.55E+07 | 8.24E+06 | 3.27E+07 | 4.27E+07 |
| 4:0    | 1.18E+08 | 3.34E+08 | 1.55E+08 | 4.00E+10 | 3.16E+10 | 3.41E+10 | 1.36E+08 | 1.90E+10 | 1.34E+09 | 3.20E+10 | 2.26E+10 | 2.21E+10 |
| 25:3   | 2.67E+08 | 1.13E+08 | 2.22E+08 | 9.07E+06 | 2.14E+06 | 3.14E+06 | 1.47E+08 | 5.83E+06 | 2.09E+07 | 1.81E+06 | 0.00E+00 | 0.00E+00 |
| 23:0   | 2.71E+08 | 1.53E+08 | 1.54E+08 | 1.24E+07 | 4.27E+06 | 6.49E+06 | 3.99E+07 | 5.23E+06 | 2.16E+07 | 1.21E+07 | 1.07E+07 | 6.68E+06 |
| 38:8   | 1.74E+08 | 1.59E+08 | 2.39E+08 | 1.61E+07 | 6.07E+07 | 1.08E+08 | 1.48E+06 | 1.90E+08 | 1.85E+08 | 8.61E+07 | 1.71E+07 | 1.37E+07 |
| 24:3   | 1.99E+08 | 9.47E+07 | 2.75E+08 | 4.72E+07 | 1.18E+08 | 2.09E+07 | 2.50E+07 | 1.02E+08 | 1.94E+08 | 8.32E+07 | 6.71E+07 | 1.25E+08 |
| 39:4   | 3.02E+08 | 1.67E+08 | 9.22E+07 | 3.16E+08 | 5.63E+08 | 2.67E+08 | 2.66E+08 | 3.25E+08 | 4.04E+08 | 5.72E+08 | 4.41E+08 | 4.08E+08 |
| 34:4   | 5.80E+07 | 2.78E+08 | 2.21E+08 | 3.65E+07 | 2.45E+07 | 4.03E+07 | 2.94E+08 | 1.27E+08 | 3.37E+07 | 1.08E+07 | 3.86E+07 | 1.96E+07 |
| 34:1p  | 2.66E+08 | 1.46E+08 | 1.44E+08 | 1.63E+08 | 1.74E+08 | 1.37E+08 | 1.62E+08 | 1.42E+08 | 9.68E+07 | 1.35E+08 | 2.29E+08 | 8.52E+07 |
| 45:10  | 1.87E+08 | 1.16E+08 | 2.42E+08 | 6.12E+07 | 1.93E+07 | 2.16E+08 | 6.66E+06 | 1.73E+07 | 8.64E+07 | 1.95E+08 | 3.07E+08 | 3.73E+08 |
| 40:2p  | 1.34E+08 | 6.80E+07 | 3.24E+08 | 1.28E+08 | 5.25E+07 | 1.11E+08 | 5.71E+07 | 6.14E+07 | 8.15E+07 | 1.79E+08 | 1.13E+08 | 1.41E+08 |
| 31:1e  | 1.51E+08 | 1.72E+08 | 1.92E+08 | 1.82E+07 | 3.02E+07 | 4.73E+07 | 0.00E+00 | 5.67E+07 | 9.65E+07 | 1.09E+08 | 1.76E+08 | 7.81E+07 |
| 39:5   | 2.05E+08 | 1.60E+08 | 1.41E+08 | 9.07E+07 | 1.35E+07 | 7.67E+07 | 5.01E+07 | 3.12E+08 | 1.02E+08 | 7.47E+07 | 1.23E+08 | 1.52E+08 |
| 35:1   | 2.23E+08 | 2.10E+08 | 6.38E+07 | 3.60E+07 | 4.27E+07 | 1.89E+07 | 6.45E+07 | 1.01E+08 | 1.23E+08 | 4.52E+07 | 4.02E+07 | 2.23E+07 |
| 26:0   | 1.97E+08 | 1.90E+08 | 1.09E+08 | 2.07E+08 | 5.50E+07 | 1.37E+08 | 6.17E+07 | 5.33E+07 | 1.09E+08 | 2.46E+08 | 1.76E+08 | 2.04E+08 |
| 44:10  | 1.62E+08 | 4.40E+07 | 2.83E+08 | 1.37E+08 | 4.67E+07 | 1.10E+08 | 1.41E+07 | 3.11E+07 | 2.57E+07 | 8.16E+07 | 2.63E+08 | 1.21E+08 |
| 36:4p  | 1.76E+08 | 9.56E+07 | 2.01E+08 | 1.24E+09 | 2.09E+09 | 9.72E+08 | 7.73E+07 | 9.21E+08 | 2.34E+08 | 1.11E+09 | 1.35E+09 | 1.15E+09 |
| d42:2  | 4.52E+08 | 8.51E+05 | 3.60E+05 | 6.94E+07 | 5.67E+07 | 4.17E+07 | 1.01E+05 | 4.22E+07 | 4.41E+07 | 5.91E+07 | 5.84E+07 | 6.06E+07 |
| 46:10  | 3.02E+08 | 4.31E+07 | 1.04E+08 | 1.63E+08 | 2.34E+08 | 2.59E+08 | 9.02E+07 | 1.33E+08 | 1.20E+08 | 2.46E+08 | 1.64E+08 | 3.58E+08 |
| 38:6e  | 2.26E+08 | 6.38E+07 | 1.48E+08 | 2.08E+08 | 2.29E+08 | 2.32E+08 | 1.15E+08 | 2.70E+08 | 2.47E+08 | 2.92E+08 | 1.55E+08 | 2.00E+08 |
| 33:4   | 1.65E+08 | 9.64E+07 | 1.72E+08 | 3.55E+08 | 2.80E+08 | 2.39E+08 | 4.52E+07 | 6.73E+07 | 5.03E+07 | 3.85E+08 | 3.21E+08 | 8.86E+07 |
| 16:0+0 | 1.31E+08 | 1.00E+08 | 1.73E+08 | 3.23E+08 | 8.76E+07 | 3.74E+08 | 6.33E+07 | 1.03E+08 | 8.89E+07 | 4.69E+08 | 2.36E+08 | 1.79E+08 |
| 56:1   | 1.18E+08 | 6.04E+07 | 1.83E+08 | 3.50E+08 | 2.20E+08 | 2.79E+08 | 3.72E+07 | 3.51E+08 | 4.66E+08 | 2.67E+08 | 4.69E+08 | 4.47E+08 |
| 22:3   | 1.79E+08 | 1.73E+08 | 0.00E+00 | 3.82E+08 | 3.22E+08 | 1.19E+08 | 6.74E+07 | 3.54E+08 | 4.55E+07 | 3.19E+08 | 1.56E+08 | 1.21E+08 |
| 33:5   | 1.19E+08 | 1.20E+08 | 1.13E+08 | 3.37E+08 | 1.20E+08 | 5.27E+08 | 5.44E+07 | 6.97E+07 | 8.78E+07 | 2.07E+08 | 4.49E+08 | 8.49E+08 |
| 40:10  | 1.58E+08 | 1.09E+08 | 4.41E+07 | 6.93E+07 | 8.65E+06 | 2.66E+08 | 8.49E+06 | 1.66E+07 | 4.83E+07 | 1.31E+08 | 4.48E+08 | 1.20E+08 |
| 24:6   | 1.50E+08 | 2.30E+07 | 1.36E+08 | 5.26E+07 | 3.28E+07 | 3.75E+07 | 9.72E+07 | 3.38E+08 | 2.27E+08 | 7.27E+07 | 1.71E+08 | 4.75E+07 |
| 31:0e  | 1.84E+08 | 1.06E+07 | 1.12E+08 | 3.37E+07 | 6.31E+07 | 4.30E+07 | 2.23E+07 | 4.55E+07 | 6.50E+07 | 1.50E+07 | 5.01E+07 | 3.58E+07 |
| d16:1  | 1.02E+08 | 8.43E+07 | 1.10E+08 | 5.86E+08 | 2.28E+08 | 1.02E+09 | 4.54E+07 | 1.75E+08 | 2.12E+08 | 9.44E+08 | 1.20E+09 | 1.97E+09 |
| d16:0  | 6.34E+07 | 1.12E+08 | 1.18E+08 | 1.73E+08 | 3.87E+08 | 9.17E+08 | 3.93E+07 | 1.38E+08 | 1.35E+07 | 8.58E+08 | 3.94E+07 | 1.92E+09 |
| 38:7p  | 7.20E+07 | 1.15E+08 | 1.02E+08 | 2.31E+07 | 1.10E+06 | 4.30E+06 | 3.44E+05 | 3.01E+06 | 1.11E+07 | 2.90E+07 | 4.41E+08 | 7.07E+07 |
| 36:3   | 1.29E+08 | 8.92E+07 | 7.04E+07 | 2.67E+08 | 1.86E+08 | 2.95E+07 | 1.48E+08 | 7.59E+07 | 1.95E+08 | 1.45E+08 | 1.26E+08 | 1.26E+08 |
| 30:1e  | 1.40E+08 | 6.24E+07 | 7.76E+07 | 2.91E+08 | 6.01E+07 | 3.51E+08 | 2.54E+07 | 4.13E+07 | 7.41E+07 | 3.66E+08 | 5.75E+07 | 9.50E+07 |
| 25:2   | 9.76E+07 | 3.88E+07 | 1.40E+08 | 4.54E+06 | 0.00E+00 | 0.00E+00 | 2.05E+07 | 4.18E+06 | 8.04E+06 | 0.00E+00 | 0.00E+00 | 0.00E+00 |
| d36:4  | 1.73E+07 | 2.00E+08 | 3.83E+07 | 2.53E+07 | 1.12E+08 | 1.40E+07 | 3.65E+07 | 3.49E+07 | 5.80E+08 | 1.62E+07 | 1.40E+07 | 1.93E+07 |
| 36:4   | 6.93E+07 | 1.14E+08 | 6.20E+07 | 2.65E+06 | 2.12E+09 | 1.23E+09 | 5.25E+07 | 7.16E+08 | 4.36E+08 | 1.19E+09 | 2.23E+09 | 1.24E+09 |
| 38:3e  | 2.00E+08 | 2.60E+07 | 1.58E+07 | 6.24E+07 | 1.52E+07 | 9.40E+07 | 1.37E+07 | 9.08E+06 | 2.27E+07 | 1.93E+07 | 2.04E+07 | 3.11E+08 |
| 22:2   | 1.73E+08 | 1.47E+07 | 4.68E+07 | 4.62E+07 | 9.90E+07 | 8.94E+07 | 5.53E+07 | 1.07E+08 | 7.97E+07 | 1.91E+08 | 6.11E+07 | 1.41E+08 |
| d36:2  | 2.11E+07 | 1.27E+07 | 2.00E+08 | 4.76E+07 | 7.75E+08 | 2.14E+08 | 1.66E+08 | 3.65E+08 | 1.34E+09 | 8.43E+08 | 1.27E+08 | 2.28E+08 |
| 30:1   | 1.37E+07 | 1.90E+08 | 8.32E+06 | 1.45E+08 | 1.78E+07 | 4.83E+08 | 2.65E+06 | 6.95E+06 | 1.28E+07 | 2.58E+08 | 5.88E+08 | 5.98E+08 |
| 40:8   | 7.45E+07 | 1.25E+07 | 1.24E+08 | 3.31E+07 | 1.26E+08 | 2.57E+08 | 8.87E+07 | 5.03E+07 | 1.94E+06 | 1.94E+06 | 0.00E+00 | 2.38E+06 |
| 26:2   | 1.49E+08 | 3.39E+07 | 2.82E+07 | 2.22E+07 | 2.76E+07 | 1.66E+08 | 2.16E+08 | 8.75E+07 | 5.89E+07 | 6.93E+07 | 2.16E+08 | 9.51E+07 |
| d43:4  | 8.15E+07 | 9.01E+07 | 3.57E+07 | 0.00E+00 | 0.00E+00 | 0.00E+00 | 4.58E+07 | 6.38E+05 | 2.30E+06 | 0.00E+00 | 0.00E+00 | 0.00E+00 |
| 39:7   | 7.33E+07 | 9.02E+07 | 3.94E+07 | 9.36E+06 | 4.02E+06 | 1.54E+07 | 3.29E+06 | 1.01E+07 | 2.58E+07 | 1.64E+07 | 3.09E+07 | 1.10E+08 |
| 20:1p  | 9.54E+07 | 5.38E+07 | 5.16E+07 | 1.29E+07 | 1.48E+07 | 5.21E+07 | 1.07E+07 | 4.34E+06 | 1.48E+07 | 1.00E+07 | 3.06E+07 | 1.06E+07 |
| 39:2   | 1.81E+07 | 1.23E+08 | 5.38E+07 | 0.00E+00 | 7.30E+06 | 8.50E+06 | 1.39E+07 | 1.82E+07 | 1.37E+07 | 1.91E+07 | 2.66E+07 | 2.04E+07 |
| 31:3   | 6.29E+07 | 1.04E+08 | 2.71E+07 | 1.30E+08 | 1.58E+08 | 2.86E+08 | 1.25E+07 | 3.06E+07 | 9.06E+06 | 3.79E+08 | 2.91E+08 | 2.91E+08 |
| 35:1p  | 7.47E+07 | 4.55E+07 | 6.89E+07 | 5.88E+06 | 1.72E+07 | 1.89E+06 | 1.43E+07 | 2.36E+07 | 5.19E+07 | 3.25E+06 | 5.15E+06 | 2.34E+06 |
| 54:1   | 3.54E+07 | 7.81E+06 | 1.45E+08 | 1.81E+08 | 1.05E+08 | 1.20E+08 | 1.02E+07 | 2.17E+08 | 2.19E+08 | 5.16E+07 | 1.41E+08 | 1.29E+08 |
| 51:9   | 1.01E+08 | 0.00E+00 | 8.72E+07 | 4.95E+08 | 2.12E+08 | 1.53E+08 | 3.54E+07 | 2.83E+08 | 4.14E+08 | 4.56E+08 | 7.11E+08 | 3.29E    |

|       |          |          |          |          |          |          |          |          |          |          |          |          |
|-------|----------|----------|----------|----------|----------|----------|----------|----------|----------|----------|----------|----------|
| 10:0  | 5.18E+06 | 6.22E+07 | 2.57E+07 | 5.14E+09 | 3.97E+09 | 9.71E+09 | 2.48E+08 | 1.88E+09 | 3.38E+08 | 5.40E+09 | 9.19E+09 | 7.59E+09 |
| 35:4  | 4.12E+07 | 1.97E+07 | 2.40E+07 | 8.10E+06 | 2.27E+07 | 4.20E+07 | 3.37E+07 | 9.44E+06 | 7.00E+07 | 3.39E+07 | 6.16E+07 | 1.17E+07 |
| 39:4p | 2.75E+07 | 1.37E+07 | 4.20E+07 | 6.08E+06 | 1.08E+07 | 2.78E+06 | 3.86E+07 | 3.77E+07 | 2.25E+07 | 4.73E+07 | 2.00E+07 | 3.65E+06 |
| 46:7  | 4.54E+07 | 7.38E+06 | 2.99E+07 | 0.00E+00 | 0.00E+00 | 2.94E+07 | 6.80E+06 | 0.00E+00 | 2.53E+06 | 8.14E+06 | 0.00E+00 | 1.53E+07 |
| 41:2  | 1.45E+07 | 6.53E+07 | 1.68E+06 | 0.00E+00 |
| 42:3p | 4.04E+07 | 3.42E+07 | 5.70E+06 | 3.56E+06 | 1.91E+06 | 0.00E+00 | 1.28E+07 | 0.00E+00 | 8.93E+06 | 5.54E+06 | 3.30E+06 | 6.14E+06 |
| 40:3  | 3.21E+07 | 3.47E+07 | 1.16E+07 | 1.66E+07 | 0.00E+00 | 4.90E+06 | 8.09E+06 | 5.22E+06 | 1.56E+07 | 3.42E+06 | 3.05E+07 | 1.00E+08 |
| 35:0  | 2.25E+06 | 1.80E+07 | 5.60E+07 | 1.12E+07 | 5.21E+06 | 1.11E+07 | 2.33E+07 | 1.20E+07 | 1.29E+07 | 1.93E+07 | 5.73E+07 | 1.66E+07 |
| 39:6  | 2.39E+07 | 2.60E+07 | 2.50E+07 | 1.12E+07 | 4.60E+07 | 5.86E+06 | 2.00E+07 | 9.87E+07 | 1.51E+08 | 1.47E+07 | 1.44E+07 | 2.36E+07 |
| 46:4  | 2.24E+07 | 2.54E+07 | 2.20E+07 | 2.98E+07 | 2.61E+07 | 1.84E+07 | 1.20E+07 | 1.41E+07 | 8.07E+06 | 2.05E+07 | 1.35E+07 | 5.03E+06 |
| 23:0e | 1.45E+07 | 2.90E+07 | 2.38E+07 | 6.14E+07 | 1.01E+07 | 6.47E+06 | 1.18E+07 | 2.04E+07 | 1.07E+07 | 5.51E+07 | 7.22E+06 | 4.09E+07 |
| d35:4 | 2.18E+07 | 1.49E+07 | 3.02E+07 | 5.45E+07 | 3.38E+07 | 7.66E+07 | 2.11E+07 | 7.00E+07 | 2.09E+07 | 7.61E+07 | 1.80E+07 | 1.16E+07 |
| 36:4e | 5.39E+07 | 0.00E+00 | 1.29E+07 | 2.61E+07 | 5.33E+07 | 1.83E+07 | 2.70E+07 | 2.90E+07 | 1.54E+07 | 2.56E+07 | 2.06E+07 | 3.02E+06 |
| 48:11 | 3.02E+06 | 1.68E+06 | 6.01E+07 | 2.46E+07 | 9.97E+06 | 0.00E+00 | 2.65E+06 | 8.49E+06 | 2.18E+07 | 3.19E+07 | 0.00E+00 | 1.40E+08 |
| 38:5  | 2.38E+07 | 3.08E+07 | 8.92E+06 | 1.62E+08 | 8.80E+07 | 5.52E+07 | 1.72E+07 | 1.64E+08 | 2.48E+07 | 7.08E+07 | 2.42E+08 | 1.09E+08 |
| 34:4p | 6.51E+06 | 5.11E+06 | 4.96E+07 | 2.64E+08 | 1.73E+08 | 3.56E+08 | 5.78E+07 | 1.68E+08 | 1.92E+07 | 9.01E+07 | 2.00E+08 | 1.10E+08 |
| 26:5  | 2.33E+07 | 2.78E+07 | 9.68E+06 | 5.12E+04 | 2.44E+07 | 2.75E+06 | 7.51E+07 | 6.30E+06 | 9.25E+06 | 0.00E+00 | 4.02E+06 | 4.80E+06 |
| 33:2p | 1.99E+07 | 4.80E+06 | 3.53E+07 | 0.00E+00 | 0.00E+00 | 1.74E+06 | 4.36E+05 | 3.41E+04 | 2.73E+06 | 4.14E+06 | 1.21E+06 | 2.45E+06 |
| 38:4  | 3.08E+07 | 1.16E+07 | 1.50E+07 | 2.66E+07 | 4.13E+07 | 2.02E+07 | 1.70E+07 | 7.37E+07 | 4.94E+07 | 3.92E+07 | 3.98E+07 | 1.10E+07 |
| 39:6p | 2.30E+07 | 1.25E+06 | 3.29E+07 | 1.25E+07 | 1.59E+07 | 1.84E+06 | 4.52E+07 | 6.76E+07 | 4.06E+07 | 1.07E+07 | 6.86E+06 | 1.00E+07 |
| d42:3 | 5.41E+07 | 0.00E+00 | 0.00E+00 | 4.26E+06 | 2.75E+06 | 1.98E+07 | 0.00E+00 | 6.60E+06 | 2.01E+07 | 0.00E+00 | 0.00E+00 | 0.00E+00 |
| 44:9  | 6.89E+06 | 2.77E+07 | 1.47E+07 | 2.58E+07 | 2.07E+07 | 1.76E+07 | 5.00E+07 | 1.72E+07 | 2.47E+07 | 3.59E+07 | 2.12E+07 | 2.33E+07 |
| 36:2  | 2.09E+07 | 1.84E+07 | 7.81E+06 | 1.96E+07 | 1.34E+07 | 2.09E+07 | 1.47E+07 | 1.52E+07 | 1.04E+07 | 1.73E+07 | 2.55E+07 | 1.47E+07 |
| 32:4  | 7.84E+06 | 1.50E+07 | 2.30E+07 | 1.26E+06 | 3.83E+06 | 4.04E+07 | 1.38E+07 | 5.11E+06 | 1.05E+07 | 2.45E+07 | 1.49E+07 | 5.40E+07 |
| 44:8  | 2.11E+07 | 1.54E+07 | 7.84E+06 | 9.59E+06 | 4.51E+07 | 9.83E+07 | 3.21E+07 | 2.80E+07 | 1.62E+07 | 7.64E+07 | 3.88E+06 | 5.07E+07 |
| 36:5  | 2.64E+07 | 1.01E+06 | 1.68E+07 | 5.00E+07 | 4.61E+07 | 6.66E+07 | 4.16E+07 | 6.84E+07 | 4.21E+07 | 8.14E+07 | 1.27E+08 | 1.08E+07 |
| 16:1p | 1.90E+06 | 1.85E+07 | 2.28E+07 | 4.55E+06 | 1.70E+06 | 3.83E+07 | 1.35E+07 | 8.73E+06 | 6.79E+06 | 1.30E+07 | 4.36E+07 | 2.20E+07 |
| 8:0p  | 1.70E+07 | 1.75E+07 | 7.58E+06 | 3.82E+08 | 2.53E+08 | 3.82E+08 | 1.13E+08 | 8.93E+07 | 5.68E+07 | 2.36E+08 | 3.70E+08 | 2.42E+08 |
| 40:2  | 0.00E+00 | 4.18E+07 | 0.00E+00 |
| 44:4  | 1.48E+07 | 0.00E+00 | 2.50E+07 | 0.00E+00 | 0.00E+00 | 0.00E+00 | 5.30E+06 | 0.00E+00 | 0.00E+00 | 0.00E+00 | 0.00E+00 | 0.00E+00 |
| 42:5  | 1.68E+07 | 1.04E+07 | 1.20E+07 | 1.48E+07 | 7.07E+06 | 2.41E+07 | 1.70E+07 | 4.43E+06 | 8.03E+06 | 4.19E+07 | 7.45E+07 | 1.52E+07 |
| d36:5 | 1.55E+07 | 8.31E+06 | 1.39E+07 | 1.55E+07 | 1.21E+08 | 1.15E+07 | 2.21E+07 | 3.87E+07 | 0.00E+00 | 2.05E+07 | 8.27E+06 | 1.76E+06 |
| d46:4 | 1.38E+07 | 1.23E+07 | 6.94E+06 | 0.00E+00 | 0.00E+00 | 0.00E+00 | 0.00E+00 | 0.00E+00 | 1.54E+06 | 0.00E+00 | 0.00E+00 | 0.00E+00 |
| 39:5p | 1.18E+07 | 4.60E+06 | 1.66E+07 | 8.12E+06 | 3.43E+07 | 4.61E+06 | 1.90E+07 | 7.92E+07 | 1.51E+08 | 3.47E+07 | 1.10E+07 | 8.46E+06 |
| 54:6  | 1.91E+07 | 1.18E+07 | 1.17E+06 | 0.00E+00 | 6.92E+04 | 1.66E+05 | 1.04E+06 | 4.07E+04 | 0.00E+00 | 3.95E+05 | 1.31E+06 | 2.57E+06 |
| 14:0e | 1.69E+07 | 7.50E+06 | 7.54E+06 | 0.00E+00 | 0.00E+00 | 0.00E+00 | 0.00E+00 | 3.79E+04 | 3.10E+06 | 4.42E+04 | 3.02E+04 | 0.00E+00 |
| 36:2e | 1.44E+07 | 8.20E+06 | 9.00E+06 | 0.00E+00 | 0.00E+00 | 0.00E+00 | 0.00E+00 | 0.00E+00 | 8.87E+05 | 0.00E+00 | 0.00E+00 | 6.18E+05 |
| 40:7  | 8.99E+06 | 1.38E+07 | 6.60E+06 | 2.56E+08 | 2.82E+08 | 6.21E+08 | 1.65E+08 | 1.93E+08 | 5.76E+07 | 3.46E+08 | 1.86E+08 | 6.82E+08 |
| d47:2 | 4.41E+06 | 1.05E+06 | 2.12E+07 | 1.02E+08 | 2.09E+07 | 3.60E+08 | 1.55E+07 | 7.55E+07 | 1.19E+08 | 3.88E+08 | 4.00E+08 | 3.12E+08 |
| 41:6  | 8.70E+06 | 8.84E+05 | 1.58E+07 | 6.44E+06 | 3.12E+06 | 5.56E+06 | 4.96E+06 | 8.72E+06 | 9.27E+06 | 4.53E+06 | 6.89E+06 | 4.15E+06 |
| 32:1  | 6.18E+06 | 7.70E+06 | 9.12E+06 | 9.79E+07 | 2.37E+07 | 1.44E+08 | 4.84E+06 | 8.21E+06 | 5.05E+06 | 9.22E+07 | 1.25E+08 | 2.89E+08 |
| 41:5  | 0.00E+00 | 1.46E+07 | 6.31E+06 | 0.00E+00 | 2.67E+06 | 0.00E+00 | 1.19E+07 | 3.72E+06 | 8.40E+06 | 0.00E+00 | 0.00E+00 | 0.00E+00 |
| 52:3  | 2.61E+06 | 1.75E+07 | 0.00E+00 | 1.56E+07 | 1.56E+07 | 1.84E+07 | 0.00E+00 | 1.54E+07 | 1.71E+06 | 5.16E+07 | 3.58E+06 | 3.63E+04 |
| 46:6  | 1.72E+06 | 1.82E+07 | 0.00E+00 | 2.97E+06 | 0.00E+00 | 0.00E+00 |
| 54:4  | 1.11E+07 | 7.06E+06 | 1.30E+06 | 2.94E+07 | 3.28E+04 | 5.12E+06 | 0.00E+00 | 1.12E+07 | 2.88E+06 | 4.00E+06 | 4.06E+06 | 0.00E+00 |
| d43:2 | 0.00E+00 | 1.94E+07 | 0.00E+00 | 1.31E+07 | 0.00E+00 | 5.43E+06 | 4.91E+07 | 6.83E+06 | 2.62E+06 | 3.92E+06 | 1.06E+07 | 2.76E+06 |
| 40:5  | 1.18E+06 | 1.82E+06 | 1.53E+07 | 3.97E+07 | 1.90E+07 | 5.26E+07 | 1.79E+07 | 1.91E+07 | 3.14E+07 | 3.36E+07 | 1.06E+08 | 4.80E+07 |
| 56:6  | 8.77E+06 | 7.45E+06 | 1.52E+06 | 0.00E+00 | 9.92E+06 | 4.16E+06 | 1.33E+07 | 2.55E+06 | 1.90E+06 | 3.88E+06 | 0.00E+00 | 0.00E+00 |
| d32:2 | 3.19E+06 | 9.94E+06 | 2.35E+06 | 1.72E+05 | 2.54E+06 | 5.68E+06 | 3.89E+05 | 5.61E+05 | 5.17E+05 | 1.32E+06 | 6.54E+06 | 6.54E+06 |
| d38:1 | 3.80E+06 | 1.92E+06 | 9.67E+06 | 0.00E+00 | 1.92E+06 | 0.00E+00 | 1.21E+07 | 1.65E+06 | 1.62E+07 | 0.00E+00 | 0.00E+00 | 0.00E+00 |
| 42:7  | 1.43E+06 | 4.90E+06 | 8.08E+06 | 3.35E+06 | 1.31E+07 | 3.91E+06 | 2.15E+07 | 8.32E+06 | 7.76E+06 | 2.97E+06 | 4.95E+06 | 5.93E+06 |
| 38:2  | 4.22E+06 | 9.90E+06 | 1.67E+05 | 2.90E+07 | 3.08E+06 | 0.00E+00 | 3.44E+06 | 4.77E+06 | 1.92E+06 | 2.04E+04 | 7.25E+06 | 0.00E+00 |
| 30:2  | 1.99E+06 | 6.89E+06 | 3.54E+06 | 1.57E+07 | 1.55E+07 | 3.95E+07 | 7.31E+06 | 2.71E+06 | 3.51E+06 | 5.73E+07 | 1.01E+08 | 7.17E+07 |
| 10:0p | 1.19E+06 | 3.86E+06 | 6.76E+06 | 5.68E+08 | 5.03E+08 | 6.04E+08 | 8.02E+06 | 2.75E+08 | 1.02E+08 | 6.95E+08 | 6.42E+08 | 3.74E+08 |
| 61:11 | 6.42E+06 | 0.00E+00 | 3.77E+06 | 0.00E+00 | 0.00E+00 | 0.00E+00 | 1.18E+06 | 0.00E+00 | 0.00E+00 | 0.00E+00 | 0.00E+00 | 0.00E+00 |
| 45:11 | 5.86E+06 | 1.90E+06 | 2.34E+06 | 0.00E+00 | 8.69E+03 | 2.67E+06 | 0.00E+00 | 7.27E+06 | 3.97E+06 | 0.00E+00 | 1.72E+06 | 3.31E+06 |
| 32:3  | 4.81E+05 | 1.80E+06 | 7.09E+06 | 3.05E+07 | 1.98E+07 | 3.26E+07 | 1.06E+07 | 1.84E+07 | 5.61E+06 | 7.72E+07 | 7.92E+07 | 5.87E+07 |
| 37:3p | 4.73E+06 | 0.00E+00 | 4.62E+06 | 3.01E+05 | 0.00E+00 | 2.15E+06 | 2.07E+05 | 8.86E+04 | 4.47E+05 | 7.54E+05 | 5.64E+06 | 5.28E+06 |
| 36:5p | 0.00E+00 | 7.25E+06 | 5.49E+05 | 2.01E+08 | 1.18E+08 | 2.94E+07 | 9.92E+05 | 1.04E+08 | 1.44E+07 | 1.35E+08 | 1.82E+08 | 8.35E+07 |
| d34:4 | 6.80E+06 | 0.00E+00 | 7.49E+05 | 1.32E+07 | 1.82E+07 | 2.21E+07 | 5.23E+05 | 8.30E+06 | 8.66E+06 | 4.40E+07 | 2.79E+07 | 2.02E+07 |
| 32:2  | 1.42E+06 | 4.78E+06 | 4.22E+05 | 1.76E+08 | 1.88E+07 | 4.38E+08 | 6.34E+05 | 2.48E+06 | 5.26E+06 | 1.69E+08 | 3.87E+08 | 1.01E+09 |
| 42:6  | 1.66E+03 | 1.16E+06 | 4.95E+06 | 2.46E+07 | 1.90E+07 | 2.70E+07 | 2.23E+07 | 1.42E+07 | 2.57E+07 | 1.39E+07 | 1.23E+08 | 1.86E+08 |
| 25:0  | 2.22E+06 | 4.08E+03 | 3.24E+06 | 1.53E+08 | 1.28E+08 | 2.47E+08 | 1.15E+04 | 6.46E+07 | 4.26E+07 | 1.27E+08 | 1.82E+08 | 1.38E+08 |
| 42:3  | 6.83E+05 | 2.48E+03 | 4.46E+06 | 6.47E+06 | 5.71E+06 | 8.11E+06 | 7.08E+06 | 3.96E+06 | 6.22E+06 | 1.12E+07 | 4.66E+07 | 1.61E+07 |
| 36:1  | 2.20E+06 | 0.00E+00 | 2.50E+06 | 1.18E+08 | 1.11E+08 | 6.40E+07 | 1.31E+06 | 2.48E+07 | 9.57E+06 | 5.01E+07 | 6.48E+07 | 4.71E+07 |
| 30:1p | 3.61E+06 | 0.00E+00 | 1.05E+06 | 1.48E+07 | 3.47E+07 | 1.64E+07 | 5.51E+06 | 2.90E+07 | 5.22E+06 | 9.80E+06 | 4.36E+07 | 1.50E+07 |
| 36:1e | 2.70E+06 | 3.64E+05 | 1.08E+06 | 0.00E+00 | 0.00E+00 | 0.00E+00 | 1.58E+06 | 0.00E+00 | 0.00E+00 | 0.00E+00 | 6.51E+04 | 0.00E+00 |
| 38:9  | 2.29E+05 | 5.50E+03 | 3.76E+06 | 3.76E+05 | 3.82E+05 | 2.25E+06 | 3.40E+05 | 2.08E+06 | 1.41E+06 | 4.39E+05 | 8.56E+06 | 8.20E+05 |
| d33:1 | 9.84E+05 | 1.57E+06 | 8.72E+05 | 9.71E+05 | 1.07E+06 | 8.36E+05 | 1.53E+06 | 6.91E+05 | 0.00E+00 | 5.86E+04 | 2.22E+06 | 0.00E+00 |
| 49:8  | 2.34E+06 | 0.00E+00 | 0.00E+00 | 2.59E+08 | 1.30E+08 | 1.02E+08 | 0.00E+00 | 6.98E+07 | 1.29E+06 | 1.48E+08 | 1.41E+08 | 1.21E+08 |
| 40:6  | 2.33E+06 | 0.00E+00 | 0.00E+00 | 0.00E+00 | 1.56E+07 | 0.00E+00 | 5.28E+06 | 6.23E+06 | 0.00E+00 | 1.07E+08 | 0.00E+00 | 0.00E+00 |
| 29:2  | 1.01E+05 | 5.35E+05 | 1.55E+06 | 3.89E+07 | 4.06E+07 | 4.05E+07 | 1.18E+06 | 3.96E+07 | 1.58E+07 | 4.51E+07 | 6.05E+07 | 2.08E+07 |
| 38:5p | 2.68E+05 | 6.65E+05 | 9.58E+05 | 1.47E+07 | 1.11E+06 | 6.84E+06 | 9.19E+05 | 3.76E+06 | 1.11E+06 | 2.07E+06 | 3.88E+06 | 9.96E+05 |
